# Supplementary material for: β-Catenin/CBP inhibition alters epidermal growth factor receptor fucosylation status in oral squamous cell carcinoma
Source: Royal Society of Chemistry journal article supplement (doi:10.1039/d0mo00009d), 2020-03-11
Supplement: d0mo00009d1.xlsx [file d0mo00009d1.xlsx]

## Sheet: S1 N Glycosylation Site Summary
Supplemental Table 1 - Summary of EGFR N-Glycosylation Sites
Site	Site (+ signal peptide )	Occupancy Data	Glycopeptide Data	Glycan Class
32	56	ü	ü	Complex
104	128	ü	ü	Complex
151	175	ü	ü	Complex >> High Mannose
172	196		ü	High mannose
328	352	ü	ü	High mannose
337	361	ü	ü	High mannose
389	413	ü	ü	Complex >> High Mannose
420	444	ü	ü	Complex >> High Mannose
504	528			N/A
544	568		ü	Complex > High Mannose
579	603	ü	ü	Complex > High Mannose
599	623		ü	High mannose
	> indicates greater than 50%
	>> indicates greater than 90%

## Sheet: S2 HILIC-C18 Summary
Supplemental Table 2 - HILIC-C18-QTOF-MS/MS Summary of EGFR Fucosylated N-Glycopeptides in CAL27 and HSC-3 Cells
SITE	Peptide Sequence	Glycans	Score (Byonic)	z	Obs._x000D_ m/z	Calc._x000D_ m/z	Error (ppm)	Off-_x000D_ By-X	Obs._x000D_ MH	Calc._x000D_ MH	Time (min)	q-value_x000D_ 2D	q-value_x000D_ 1D
N151	R.DIVSSDFLSNMSMDFQNHLGSCQK.C	HexNAc(2)Hex(6)	169.6	4	1035.43	1035.43	1.65		4138.69	4138.68	28.9365	2e-05	2.4e-05
		HexNAc(2)Hex(8)	249	4	1116.45	1116.45	1.88		4462.8	4462.79	28.8875	7e-06	8.1e-06
		HexNAc(2)Hex(9)	481.3	4	1156.97	1156.97	0.05		4624.84	4624.84	28.8695	3.8e-07	4.4e-07
		HexNAc(4)Hex(5)Fuc(1)	417	4	1132.96	1132.97	-0.06	1	4528.83	4527.83	28.8372	2.4e-06	2.8e-06
		HexNAc(4)Hex(5)Fuc(1)NeuAc(1)	320.7	4	1205.73	1205.74	-4.85		4819.92	4819.94	29.187	1e-06	1.2e-06
		HexNAc(4)Hex(5)Fuc(2)	316.3	4	1169.48	1169.48	0.7		4674.91	4674.9	28.8575	1.1e-06	1.2e-06
		HexNAc(4)Hex(5)Fuc(2)NeuAc(1)	67.2	4	1242.26	1242.26	7.76		4966.04	4966	2.5232	0.0035	0.004
		HexNAc(4)Hex(6)	157.6	4	1136.96	1136.97	-5.9		4544.81	4544.84	28.533	0.00013	0.00014
		HexNAc(5)Hex(6)Fuc(1)	325.4	4	1224.25	1224.25	-0.01		4893.98	4893.98	28.7877	1.3e-06	1.5e-06
		HexNAc(5)Hex(6)Fuc(3)	189.1	4	1297.27	1297.02	-4.66	1	5186.05	5185.07	28.7552	2.5e-06	2.9e-06
		HexNAc(5)Hex(6)Fuc(2)	330.6	4	1260.77	1260.76	1.21		5040.04	5040.04	28.7237	1.3e-06	1.5e-06
		HexNAc(5)Hex(6)Fuc(3)	185.7	5	1038.03	1038.02	2.24		5186.11	5186.09	28.7267	4.2e-05	4.9e-05
		HexNAc(5)Hex(6)Fuc(2)NeuAc(1)	392.1	5	1067.04	1066.83	5.96	1	5331.15	5330.11	29.1372	4e-06	4.7e-06
		HexNAc(5)Hex(6)Fuc(3)NeuAc(1)	129	5	1096.25	1096.24	2.1		5477.2	5477.19	29.1208	0.00018	0.0002
N328	R.KVCNGIGIGEFKDSLSINATNIK.H	HexNAc(2)Hex(5)	199.3	4	924.433	924.437	-4.42		3694.71	3694.72	26.5513	3.3e-05	3.8e-05
		HexNAc(2)Hex(6)	411.4	4	964.947	964.95	-3.06		3856.77	3856.78	26.5085	5.2e-07	6e-07
		HexNAc(2)Hex(7)	414.9	4	1005.45	1005.46	-8.15		4018.8	4018.83	26.4887	5.7e-07	6.6e-07
		HexNAc(2)Hex(8)	204.3	4	1046.22	1045.98	-3.79	1	4181.87	4180.88	26.7233	3.4e-05	3.9e-05
N337	K.HFKNCTSISGDLHILPVAFR.G	HexNAc(2)Hex(4)	574.7	4	842.399	842.397	2.73		3366.58	3366.57	26.823	4.7e-07	5.4e-07
		HexNAc(2)Hex(5)	535.4	4	882.906	882.91	-5.05		3528.6	3528.62	26.8365	6e-07	6.9e-07
		HexNAc(2)Hex(6)	535.5	4	923.417	923.424	-7.54		3690.64	3690.67	26.8245	1.2e-06	1.4e-06
		HexNAc(2)Hex(7)	532.9	5	771.348	771.351	-4.18		3852.71	3852.73	26.9055	4.9e-07	5.7e-07
		HexNAc(2)Hex(8)	431.3	5	803.757	803.761	-5		4014.76	4014.78	26.8215	4e-07	4.6e-07
N389	K.TVKEITGFLLIQAWPENRTDLHAFENLEIIR.G	HexNAc(2)Hex(8)	298.5	5	1074.71	1074.71	-9.14		5369.5	5369.55	30.3045	0.00035	0.00041
		HexNAc(2)Hex(9)	279.8	5	1107.12	1107.13	-1.99		5531.59	5531.6	30.2862	0.00049	0.00057
		HexNAc(4)Hex(5)Fuc(1)NeuAc(1)	262.5	6	955.285	955.289	-4.34		5726.67	5726.7	30.6555	0.00023	0.00027
		HexNAc(4)Hex(5)Fuc(1)NeuAc(2)	199.8	5	1204.37	1204.36	1.14		6017.8	6017.79	31.1338	0.00078	0.0009
		HexNAc(4)Hex(5)Fuc(2)NeuAc(1)	68.4	5	1175.36	1175.36	3.38		5872.78	5872.76	30.7143	0.059	0.059
		HexNAc(4)Hex(5)Fuc(3)	96.6	6	955.458	955.459	-1.16		5727.71	5727.72	30.2365	0.016	0.019
		HexNAc(5)Hex(6)Fuc(1)	157.5	5	1160.95	1160.95	-0.7		5800.73	5800.74	30.2172	0.0043	0.0051
		HexNAc(5)Hex(6)Fuc(2)	166.9	5	1190.16	1190.16	-0.76		5946.79	5946.79	30.2143	0.0016	0.0019
N420	R.TKQHGQFSLAVVSLNITSLGLR.S	HexNAc(2)Hex(6)	50.5	4	937.7	937.707	-7.01		3747.78	3747.81	29.0772	0.0059	0.013
		HexNAc(2)Hex(8)	399	4	1018.74	1018.73	3.63		4071.93	4071.91	29.0105	3e-06	3.4e-06
		HexNAc(2)Hex(9)	448.5	4	1059.25	1059.25	2.96		4233.98	4233.96	28.9757	2.3e-06	2.6e-06
		HexNAc(3)Hex(5)NeuAc(1)	278.4	4	1020.74	1020.74	-1.81		4079.92	4079.93	29.6872	2.4e-05	2.8e-05
		HexNAc(3)Hex(6)NeuAc(1)	199	4	1061.25	1061.25	1.95		4241.99	4241.98	29.665	8.1e-05	9.3e-05
		HexNAc(4)Hex(5)	305.5	4	998.739	998.733	5.66		3991.93	3991.91	28.9903	5.3e-06	6.1e-06
		HexNAc(4)Hex(5)Fuc(1)	374.3	4	1035.25	1035.25	1.54		4137.98	4137.97	28.9875	1.9e-06	2.2e-06
		HexNAc(4)Hex(5)Fuc(1)NeuAc(1)	337.9	4	1108.02	1108.02	-0.15		4429.06	4429.06	29.5007	2.6e-06	3.1e-06
		HexNAc(4)Hex(5)Fuc(2)	265.2	4	1071.76	1071.76	2.06		4284.04	4284.03	28.9597	3.2e-06	3.7e-06
		HexNAc(4)Hex(5)NeuAc(1)	500.7	5	857.401	857.407	-7.69		4282.97	4283.01	29.5927	1.7e-06	2e-06
		HexNAc(4)Hex(5)NeuAc(2)	290.9	5	915.626	915.626	-0.7		4574.1	4574.1	30.2342	8.3e-06	9.6e-06
		HexNAc(5)Hex(6)Fuc(1)NeuAc(1)	286.7	4	1199.31	1199.3	1.26		4794.2	4794.2	29.5253	2.2e-06	2.6e-06
		HexNAc(5)Hex(6)NeuAc(2)	42.4	5	988.651	988.653	-2.2		4939.22	4939.23	30.1838	0.0014	0.0016
N544	R.EFVENSECIQCHPECLPQAMNITCTGRGPDNCIQCAHYIDGPHCVK.T	HexNAc(2)Hex(8)	281.7	6	1201.66	1201.66	-2.34		7204.9	7204.92	25.5237	0.00041	0.00047
		HexNAc(2)Hex(9)	102.6	6	1228.66	1228.67	-2.87		7366.95	7366.97	25.573	0.016	0.019
		HexNAc(6)Hex(7)Fuc(1)	134.7	6	1334.38	1334.38	-1		8001.24	8001.24	25.4057	0.0012	0.0014
		HexNAc(6)Hex(7)Fuc(1)NeuAc(1)	152.5	6	1382.9	1382.9	5.27		8292.38	8292.34	25.5962	0.0018	0.0021
		HexNAc(6)Hex(7)Fuc(1)NeuAc(3)	50	6	1479.93	1479.93	-0.57		8874.53	8874.53	26.1208	0.0022	0.0026
		HexNAc(6)Hex(7)NeuAc(1)	65	6	1358.71	1358.55	-7.01	1	8147.23	8146.28	25.398	0.0038	0.0044
		HexNAc(7)Hex(8)Fuc(1)NeuAc(3)	104.2	7	1320.81	1320.82	-6.88		9239.6	9239.66	26.0422	0.0055	0.0063
N579	K.TCPAGVMGENNTLVWK.Y	HexNAc(2)Hex(8)	447.4	3	1160.48	1160.48	3.9		3479.44	3479.42	25.8978	5.5e-07	6.4e-07
		HexNAc(2)Hex(9)	424.5	3	1214.49	1214.5	-5.67		3641.45	3641.47	25.8925	2.9e-07	3.3e-07
		HexNAc(4)Hex(5)Fuc(1)	290.8	3	1182.5	1182.5	2.14		3545.49	3545.48	25.9037	2.2e-06	2.5e-06
		HexNAc(4)Hex(5)Fuc(1)NeuAc(1)	251.1	3	1279.53	1279.53	2.84		3836.59	3836.58	26.3572	2.1e-06	2.4e-06
		HexNAc(4)Hex(5)Fuc(1)NeuAc(2)	216	4	1032.67	1032.67	0.59		4127.67	4127.67	26.7482	7.2e-06	8.4e-06
		HexNAc(4)Hex(5)Fuc(2)	355	4	923.638	923.64	-2.22		3691.53	3691.54	25.8587	4.9e-06	5.7e-06
		HexNAc(4)Hex(5)Fuc(2)NeuAc(1)	186	4	996.408	996.414	-6.16		3982.61	3982.63	26.3763	6.1e-05	7e-05
		HexNAc(5)Hex(6)Fuc(1)	133.1	4	978.403	978.409	-6.18		3910.59	3910.61	25.8495	0.0025	0.0029
		HexNAc(5)Hex(6)Fuc(1)NeuAc(1)	162.4	4	1051.18	1051.18	-1.57		4201.7	4201.71	26.2565	0.00013	0.00015
*Note: EGFR glycopeptides that (a) were fucosylated and (b) in which multiple glycoforms were detected, are included in this table.

## Sheet: S3 HILIC C18 CAL27_DMSO
Supplemental Table 3 - HILIC-C18-QTOF-MS/MS Summary of EGFR N-Glycopeptides in CAL27 cells + DMSO
122116_HILICC18_Cal27_DMSO
SITE	Peptide Sequence	Glycans	Score	z	Obs._x000D_ m/z	Calc._x000D_ m/z	Time (min)	Error (ppm)	Off-_x000D_ By-X	Obs._x000D_ MH	Calc._x000D_ MH	q-value_x000D_ 2D	q-value_x000D_ 1D
N151	R.DIVSSDFLSNMSMDFQNHLGSCQK.C	HexNAc(2)Hex(8)	110	4	1116.45	1116.45	28.482	0.49		4462.79	4462.79	0.0037	0.0041
		HexNAc(4)Hex(5)Fuc(1)NeuAc(1)	109.1	4	1205.74	1205.74	28.9018	-0.22		4819.94	4819.94	0.00061	0.00069
		HexNAc(4)Hex(5)Fuc(2)NeuAc(1)	91.4	4	1242.26	1242.26	28.8982	1.21		4966.01	4966	0.0024	0.0027
		HexNAc(4)Hex(5)Fuc(2)	391.8	4	1169.48	1169.23	28.4018	1.22	1	4674.89	4673.88	4.9e-05	5.6e-05
		HexNAc(5)Hex(6)Fuc(2)	107	4	1260.77	1260.76	28.3775	2.12		5040.05	5040.04	0.0013	0.0015
N328	K.VCNGIGIGEFKDSLSINATNIK.H	HexNAc(2)Hex(5)	145.8	4	892.408	892.413	26.6292	-5.25		3566.61	3566.63	0.00022	0.00025
		HexNAc(2)Hex(6)	408.1	4	932.921	932.926	26.5945	-5.56		3728.66	3728.68	3.9e-06	4.4e-06
		HexNAc(2)Hex(7)	340.3	4	973.442	973.439	26.5972	2.78		3890.75	3890.74	1.4e-05	1.5e-05
		HexNAc(2)Hex(8)	141.5	4	1013.95	1013.95	26.5772	-5.36		4052.77	4052.79	9.6e-05	0.00011
		HexNAc(2)Hex(9)	128.4	4	1054.47	1054.47	26.5543	-0.29		4214.84	4214.84	0.00036	0.0004
N337	K.HFKNCTSISGDLHILPVAFR.G	HexNAc(2)Hex(4)	288.6	4	842.4	842.397	26.0707	3.31		3366.58	3366.57	0.0002	0.00023
		HexNAc(2)Hex(5)	381	4	882.913	882.91	26.1185	3.34		3528.63	3528.62	2.1e-05	2.4e-05
		HexNAc(2)Hex(7)	352.5	5	771.35	771.351	26.122	-1.15		3852.72	3852.73	3.5e-05	4e-05
		HexNAc(2)Hex(8)	208.1	5	803.76	803.761	26.06	-1.88		4014.77	4014.78	9.2e-05	0.0001
N389	K.TVKEITGFLLIQAWPENRTDLHAFENLEIIR.G	HexNAc(4)Hex(5)Fuc(1)NeuAc(1)	242.2	5	1146.14	1146.15	30.453	-4.39		5726.67	5726.7	0.0007	0.0008
		HexNAc(4)Hex(5)Fuc(1)NeuAc(2)	64.4	5	1204.36	1204.36	30.9402	-5.16		6017.76	6017.79	0.021	0.024
		HexNAc(4)Hex(5)Fuc(2)NeuAc(1)	179.2	5	1175.36	1175.36	30.4193	-0.04		5872.76	5872.76	0.019	0.021
N420	R.TKQHGQFSLAVVSLNITSLGLR.S	HexNAc(4)Hex(5)Fuc(1)	101.2	4	1035.25	1035.25	28.4855	1.54		4137.98	4137.97	0.0003	0.00034
		HexNAc(4)Hex(5)Fuc(1)NeuAc(1)	206.2	5	886.616	886.619	29.1418	-3.25		4429.05	4429.06	0.00011	0.00012
		HexNAc(4)Hex(5)NeuAc(1)	342.4	4	1071.5	1071.51	29.1322	-3.82		4282.99	4283.01	3.7e-05	4.2e-05
		HexNAc(4)Hex(5)NeuAc(2)	215	4	1144.28	1144.28	29.933	-3.43		4574.09	4574.1	2.8e-05	3.1e-05
N579	K.TCPAGVMGENNTLVWK.Y	HexNAc(2)Hex(8)	235.6	3	1160.48	1160.48	2.69	-1.97		3479.42	3479.42	0.00042	0.00047
		HexNAc(4)Hex(5)Fuc(1)	264.5	3	1182.49	1182.5	2.6944	-4.7		3545.46	3545.48	0.0005	0.00056
		HexNAc(4)Hex(5)Fuc(1)NeuAc(1)	285.4	4	959.901	959.899	25.631	2.06		3836.58	3836.58	0.0015	0.0018
		HexNAc(4)Hex(5)Fuc(1)NeuAc(2)	214	3	1376.56	1376.56	2.6854	1.81		4127.68	4127.67	0.00018	0.00021
		HexNAc(4)Hex(5)Fuc(2)	61.2	3	1231.18	1231.18	25.0758	0.04		3691.54	3691.54	0.011	0.013

## Sheet: S4 HILIC C18 CAL27_ICG001
Supplemental Table 4 - HILIC-C18-QTOF-MS/MS Summary of EGFR N-Glycopeptides in CAL27 cells + ICG-001
122116_HILICC18_Cal27_ICG001
SITE	Peptide Sequence	Glycans	Score	z	Obs._x000D_ m/z	Calc._x000D_ m/z	PPM	Off-_x000D_ By-X	Obs._x000D_ MH	Calc._x000D_ MH	Scan_x000D_ Time	q-value_x000D_ 2D	q-value_x000D_ 1D
N151	R.DIVSSDFLSNMSMDFQNHLGSCQK.C	HexNAc(2)Hex(6)	88.3	4	1035.42	1035.43	-5.65		4138.66	4138.68	28.4838	2.6e-05	3.3e-05
		HexNAc(2)Hex(8)	239.3	4	1116.46	1116.45	3.16		4462.8	4462.79	28.4793	1.7e-06	2.2e-06
		HexNAc(2)Hex(9)	489.8	4	1156.96	1156.97	-2.35		4624.83	4624.84	28.4025	4.4e-08	5.5e-08
		HexNAc(4)Hex(5)Fuc(1)	255.6	4	1132.96	1132.97	-0.54		4528.83	4527.83	28.4238	3.4e-07	4.3e-07
		HexNAc(4)Hex(5)Fuc(1)NeuAc(1)	394.9	4	1205.74	1205.74	1.99		4819.95	4819.94	28.8515	8.9e-08	1.1e-07
		HexNAc(4)Hex(5)Fuc(1)NeuAc(2)	226	4	1278.51	1278.51	-6.22		5111	5111.04	29.3755	7.9e-07	1e-06
		HexNAc(4)Hex(5)Fuc(2)	262.1	4	1169.48	1169.48	-1.18		4674.9	4674.9	28.3647	4.9e-07	6.2e-07
		HexNAc(4)Hex(5)Fuc(2)NeuAc(1)	335.1	4	1242.26	1242.26	3.41		4966.02	4966	28.8492	1.5e-06	1.9e-06
		HexNAc(4)Hex(5)Fuc(3)	327.6	4	1206	1206	0.33		4820.96	4820.96	28.373	5.8e-07	7.3e-07
		HexNAc(4)Hex(5)Fuc(3)NeuAc(1)	195.5	4	1278.52	1278.77	1.1	-1	5111.06	5112.06	29.406	0.00012	0.00015
		HexNAc(4)Hex(5)NeuAc(1)	310.5	4	1169.48	1169.23	1.47	1	4674.89	4673.88	28.4578	8e-07	1e-06
		HexNAc(4)Hex(5)NeuAc(2)	394.5	4	1242.25	1242	-4.22	1	4965.96	4964.98	28.823	7.5e-08	9.5e-08
		HexNAc(5)Hex(6)Fuc(1)NeuAc(1)	237.3	4	1297.27	1297.02	-1.73	1	5186.07	5185.07	28.3688	4.6e-07	5.7e-07
		HexNAc(5)Hex(6)Fuc(1)NeuAc(2)	70.8	4	1369.79	1369.8	-4.32		5476.15	5476.17	29.3	5.3e-05	6.7e-05
		HexNAc(5)Hex(6)Fuc(2)	63.4	4	1260.77	1260.76	3.01		5040.05	5040.04	28.4335	0.0001	0.00013
		HexNAc(5)Hex(6)Fuc(3)	250.9	4	1297.28	1297.28	4.6		5186.12	5186.09	28.3122	1.6e-06	2e-06
		HexNAc(5)Hex(6)Fuc(3)NeuAc(1)	215.1	5	1096.24	1096.24	1.14		5477.2	5477.19	28.7718	1.7e-06	2.1e-06
		HexNAc(5)Hex(6)NeuAc(2)	183.1	4	1333.53	1333.28	0.49	1	5331.12	5330.11	28.8625	7.3e-07	9.2e-07
N328	K.VCNGIGIGEFKDSLSINATNIK.H	HexNAc(2)Hex(5)	360.3	4	892.408	892.413	-5.59		3566.61	3566.63	26.586	9.6e-07	1.2e-06
		HexNAc(2)Hex(6)	430.5	4	932.921	932.926	-5.68		3728.66	3728.68	26.5528	7.4e-08	9.3e-08
		HexNAc(2)Hex(7)	353.6	4	973.431	973.439	-8.61		3890.7	3890.74	26.53	2.4e-06	3e-06
		HexNAc(2)Hex(8)	378.2	4	1013.95	1013.95	-3.94		4052.77	4052.79	26.5365	8.7e-07	1.1e-06
N337	K.NCTSISGDLHILPVAFR.G	HexNAc(2)Hex(4)	252.8	3	985.454	985.453	1.08		2954.35	2954.34	27.5713	3.3e-06	4.1e-06
		HexNAc(2)Hex(5)	480.5	3	1039.47	1039.47	1.99		3116.4	3116.4	27.4462	6.4e-08	8.1e-08
		HexNAc(2)Hex(6)	560.9	4	820.368	820.368	0.1		3278.45	3278.45	27.5255	3e-09	3.8e-09
		HexNAc(2)Hex(7)	625.1	4	860.877	860.881	-5		3440.49	3440.5	27.458	6e-10	7.5e-10
		HexNAc(2)Hex(8)	694	3	1201.52	1201.52	-2.25		3602.55	3602.56	27.3838	1.5e-10	1.9e-10
		HexNAc(2)Hex(9)	450.8	4	941.901	941.908	-6.72		3764.58	3764.61	27.3933	5.8e-08	7.3e-08
		HexNAc(3)Hex(5)	83.7	4	830.62	830.625	-5.6		3319.46	3319.48	27.6	0.00026	0.00033
		HexNAc(3)Hex(5)NeuAc(1)	74.6	4	903.396	903.399	-2.79		3610.56	3610.57	28.038	0.00021	0.00026
		HexNAc(3)Hex(6)	439.7	4	871.14	871.138	2.39		3481.54	3481.53	27.5275	5.5e-08	6.9e-08
N389	K.EITGFLLIQAWPENR.T	HexNAc(2)Hex(7)	214.5	3	1109.82	1109.83	-9.37		3327.45	3327.48	29.6292	9.4e-06	1.2e-05
		HexNAc(2)Hex(8)	366	3	1163.85	1163.85	-0.2		3489.53	3489.53	29.5645	4.7e-08	5.9e-08
		HexNAc(2)Hex(9)	420.7	3	1217.87	1217.87	-0.24		3651.58	3651.58	29.5292	2.6e-08	3.2e-08
		HexNAc(4)Hex(5)Fuc(1)	248.8	4	889.646	889.653	-7.17		3555.56	3555.59	29.5228	7.8e-06	9.7e-06
		HexNAc(4)Hex(5)Fuc(1)NeuAc(1)	280.2	4	962.424	962.426	-2.42		3846.67	3846.68	30.0057	5e-06	6.2e-06
		HexNAc(4)Hex(5)Fuc(1)NeuAc(2)	338.9	4	1035.2	1035.2	-3.81		4137.76	4137.78	30.828	5.1e-07	6.4e-07
		HexNAc(4)Hex(5)Fuc(2)	286	4	926.165	926.167	-2.32		3701.64	3701.65	29.467	4.9e-06	6.1e-06
		HexNAc(4)Hex(5)Fuc(2)NeuAc(1)	281.6	4	998.939	998.941	-1.32		3992.74	3992.74	30.0862	8.9e-07	1.1e-06
		HexNAc(4)Hex(5)Fuc(3)	191.2	4	962.683	962.681	1.98		3847.71	3847.7	29.4697	1.1e-05	1.4e-05
		HexNAc(5)Hex(6)Fuc(1)NeuAc(1)	167.2	4	1053.96	1053.71	-0.9	1	4212.82	4211.82	29.3843	6.5e-06	8.2e-06
		HexNAc(5)Hex(6)Fuc(1)NeuAc(2)	114.8	4	1126.48	1126.48	0.91		4502.92	4502.91	30.7813	3.3e-05	4.2e-05
N420	R.TKQHGQFSLAVVSLNITSLGLR.S	HexNAc(2)Hex(8)	199.7	4	1018.73	1018.73	-4.36		4071.89	4071.91	28.4622	5.4e-06	6.8e-06
		HexNAc(2)Hex(9)	276.1	4	1059.24	1059.25	-6.24		4233.94	4233.96	28.4542	1.7e-06	2.2e-06
		HexNAc(3)Hex(5)NeuAc(1)	233.5	4	1020.73	1020.74	-8.85		4079.89	4079.93	29.2363	3e-05	3.8e-05
		HexNAc(3)Hex(6)NeuAc(1)	252.1	4	1061.25	1061.25	-4.66		4241.96	4241.98	29.1765	1.9e-06	2.4e-06
		HexNAc(4)Hex(5)Fuc(1)	83.8	4	1035.25	1035.25	2.47		4137.98	4137.97	28.4517	0.0012	0.0016
		HexNAc(4)Hex(5)Fuc(1)NeuAc(1)	391.2	4	1108.02	1108.02	-0.88		4429.06	4429.06	29.121	1.3e-06	1.6e-06
		HexNAc(4)Hex(5)Fuc(2)NeuAc(1)	166.1	4	1144.54	1144.54	0.07		4575.12	4575.12	29.0468	2.2e-06	2.8e-06
		HexNAc(4)Hex(5)NeuAc(1)	464.2	5	857.402	857.407	-6.38		4282.98	4283.01	29.1478	5.9e-07	7.4e-07
		HexNAc(4)Hex(5)NeuAc(2)	379.1	5	915.625	915.626	-1.95		4574.09	4574.1	29.8602	1e-06	1.3e-06
		HexNAc(5)Hex(6)NeuAc(1)	165.5	4	1162.79	1162.79	1.56		4648.15	4648.14	29.0707	2.1e-06	2.6e-06
N579	K.TCPAGVMGENNTLVWK.Y	HexNAc(2)Hex(8)	306.7	3	1160.48	1160.48	-0.86		3479.42	3479.42	25.035	1.8e-07	2.3e-07
		HexNAc(2)Hex(9)	175.1	3	1214.49	1214.5	-2.76		3641.46	3641.47	25.0208	3.5e-07	4.4e-07
		HexNAc(4)Hex(5)Fuc(1)NeuAc(1)	412.1	4	959.902	959.899	2.39		3836.58	3836.58	25.5555	8.4e-08	1.1e-07
		HexNAc(4)Hex(5)Fuc(1)NeuAc(2)	308.2	4	1032.67	1032.67	-5.97		4127.65	4127.67	26.1248	1.1e-06	1.4e-06
		HexNAc(4)Hex(5)Fuc(2)	161.1	4	923.636	923.64	-3.99		3691.52	3691.54	25.0463	1.6e-05	2e-05

## Sheet: S5 HILIC C18 HSC3_DMSO
Supplemental Table 5 - HILIC-C18-QTOF-MS/MS Summary of EGFR N-Glycopeptides in HSC-3 Cells + DMSO
041117_HILICC18_HSC3_DMSO
SITE	Peptide Sequence	Glycans	Score	z	Obs._x000D_ m/z	Calc._x000D_ m/z	ppm_x000D_ err.	Off-_x000D_ By-X	Obs._x000D_ MH	Calc._x000D_ MH	Time (min)	q-value_x000D_ 2D	q-value_x000D_ 1D
N104	R.GNMYYENSYALAVLSNYDANKTGLKELPMR.N	HexNAc(4)Hex(5)Fuc(1)NeuAc(1)	136.4	5	1097.88	1097.88	-3.25		5485.37	5485.39	28.7225	0.0049	0.0057
		HexNAc(4)Hex(5)Fuc(1)NeuAc(2)	100.7	5	1156.1	1156.1	-4.36		5776.46	5776.48	29.0978	0.0055	0.0064
		HexNAc(4)Hex(5)Fuc(2)	87.6	4	1335.85	1335.84	3.25		5340.37	5340.35	28.3773	0.014	0.023
N151	R.DIVSSDFLSNMSMDFQNHLGSCQK.C	HexNAc(2)Hex(6)	169.6	4	1035.43	1035.43	1.65		4138.69	4138.68	28.9365	2e-05	2.4e-05
		HexNAc(4)Hex(5)Fuc(1)	417	4	1132.96	1132.97	-0.06	1	4528.83	4527.83	28.8372	2.4e-06	2.8e-06
		HexNAc(4)Hex(5)Fuc(1)NeuAc(1)	298.9	5	964.796	964.794	2.48		4819.95	4819.94	29.2452	4.1e-05	4.8e-05
		HexNAc(4)Hex(5)Fuc(2)	458.3	4	1169.48	1169.48	2.56		4674.92	4674.9	28.7893	3.2e-06	3.7e-06
		HexNAc(4)Hex(5)NeuAc(2)	106.9	4	1242.25	1242	1.96	1	4965.99	4964.98	29.2937	0.00097	0.0011
		HexNAc(4)Hex(6)	77	4	1136.96	1136.97	-4.64		4544.82	4544.84	28.5847	0.002	0.0024
		HexNAc(5)Hex(6)Fuc(1)	66.2	4	1224.25	1224.25	-0.49		4893.98	4893.98	28.7678	0.0011	0.0013
N328	R.KVCNGIGIGEFKDSLSINATNIK.H	HexNAc(2)Hex(6)	64.1	4	964.943	964.95	-7.06		3856.75	3856.78	26.5148	0.0051	0.006
		HexNAc(2)Hex(7)	284	4	1005.45	1005.46	-9.94		4018.79	4018.83	26.4883	1.9e-05	2.2e-05
		HexNAc(2)Hex(8)	247	4	1045.97	1045.98	-2.05		4180.87	4180.88	26.483	2.9e-05	3.4e-05
N337	K.HFKNCTSISGDLHILPVAFR.G	HexNAc(2)Hex(5)	418.6	4	882.905	882.91	-6.05		3528.6	3528.62	26.8628	2.1e-05	2.4e-05
		HexNAc(2)Hex(6)	520.9	4	923.426	923.424	2.59		3690.68	3690.67	26.8472	1.8e-05	2.1e-05
		HexNAc(2)Hex(7)	420.7	5	771.354	771.351	4.22		3852.74	3852.73	26.8427	1.2e-05	1.5e-05
		HexNAc(2)Hex(8)	385.1	5	803.756	803.761	-6.32		4014.75	4014.78	26.8322	5.3e-06	6.2e-06
		HexNAc(2)Hex(9)	214.5	5	836.17	836.172	-1.82		4176.82	4176.83	26.8037	5.9e-05	6.9e-05
N389	K.TVKEITGFLLIQAWPENRTDLHAFENLEIIR.G	HexNAc(2)Hex(9)	168.3	5	1107.12	1107.13	-5.21		5531.57	5531.6	30.3257	0.0033	0.0039
		HexNAc(4)Hex(5)Fuc(1)NeuAc(1)	222.1	6	955.286	955.289	-3.53		5726.68	5726.7	30.6568	0.0007	0.00082
		HexNAc(4)Hex(5)Fuc(1)NeuAc(2)	362.2	4	1505.2	1505.2	-5.65		6017.76	6017.79	31.1188	0.00013	0.00015
		HexNAc(4)Hex(5)Fuc(3)NeuAc(1)	295.5	5	1204.37	1204.57	-0.89	-1	6017.81	6018.81	31.1063	0.00082	0.00096
		HexNAc(5)Hex(6)Fuc(1)NeuAc(1)	139.8	5	1219.17	1218.97	-2.95	1	6091.8	6090.81	30.5905	0.0025	0.003
		HexNAc(5)Hex(6)Fuc(1)NeuAc(2)	227.8	5	1277.39	1277.39	-3.47		6382.9	6382.93	31.0415	0.00063	0.00074
N420	R.TKQHGQFSLAVVSLNITSLGLR.S	HexNAc(2)Hex(6)	322.4	4	937.701	937.707	-5.96		3747.78	3747.81	29.0457	1.2e-05	1.4e-05
		HexNAc(2)Hex(7)	309	4	978.218	978.22	-1.96		3909.85	3909.86	29.0157	7.8e-06	9.2e-06
		HexNAc(2)Hex(8)	374.6	4	1018.74	1018.73	2.7		4071.92	4071.91	28.9873	1.1e-05	1.2e-05
		HexNAc(2)Hex(9)	413.6	4	1059.25	1059.25	1.32		4233.97	4233.96	28.9992	8.1e-06	9.5e-06
		HexNAc(3)Hex(5)NeuAc(1)	160.1	4	1020.74	1020.74	-1.23		4079.92	4079.93	29.7348	0.0013	0.0015
		HexNAc(3)Hex(6)NeuAc(1)	137.4	4	1061.25	1061.25	3.17		4241.99	4241.98	29.6713	0.00042	0.00049
		HexNAc(4)Hex(5)Fuc(1)	74.7	4	1035.25	1034.99	2.21	1	4137.96	4136.95	29.0003	0.00036	0.00042
		HexNAc(4)Hex(5)Fuc(1)	351.5	4	1035.25	1035.25	0.19		4137.97	4137.97	28.959	7.2e-06	8.5e-06
		HexNAc(4)Hex(5)Fuc(1)NeuAc(1)	334.3	5	886.616	886.619	-2.93		4429.05	4429.06	29.5345	1.2e-05	1.4e-05
		HexNAc(4)Hex(5)Fuc(1)NeuAc(2)	88.8	5	944.835	944.838	-3.05		4720.15	4720.16	30.2082	0.0052	0.0061
		HexNAc(4)Hex(5)Fuc(2)NeuAc(1)	181.6	4	1144.54	1144.54	3.01		4575.14	4575.12	29.5395	0.00015	0.00018
		HexNAc(4)Hex(5)Fuc(3)NeuAc(1)	79.4	4	1180.8	1181.05	0.54	-1	4720.18	4721.18	30.2	0.032	0.036
		HexNAc(4)Hex(5)NeuAc(1)	376.1	4	1071.5	1071.51	-5		4282.99	4283.01	29.5925	1.4e-05	1.6e-05
		HexNAc(4)Hex(5)NeuAc(2)	308.4	4	1144.28	1144.28	-0.84		4574.1	4574.1	30.2313	1.4e-05	1.6e-05
N544	R.EFVENSECIQCHPECLPQAMNITCTGRGPDNCIQCAHYIDGPHCVK.T	HexNAc(2)Hex(8)	251	6	1201.66	1201.66	-2.08		7204.91	7204.92	25.469	0.00089	0.001
		HexNAc(2)Hex(9)	245.7	6	1228.67	1228.67	-2.58		7366.96	7366.97	25.503	0.00046	0.00054
		HexNAc(4)Hex(5)Fuc(1)NeuAc(2)	70.6	6	1309.7	1309.7	-1.93		7853.16	7853.17	25.966	0.006	0.007
N579	K.TCPAGVMGENNTLVWK.Y	HexNAc(2)Hex(8)	440.1	3	1160.48	1160.48	1.63		3479.43	3479.42	25.9273	2.7e-06	3.1e-06
		HexNAc(2)Hex(9)	321.9	3	1214.49	1214.5	-8.34		3641.44	3641.47	25.8713	1.6e-05	1.9e-05
		HexNAc(3)Hex(4)Fuc(1)	324.4	3	1060.79	1060.79	-1.43		3180.34	3180.35	25.8778	5.8e-06	6.8e-06
		HexNAc(4)Hex(5)Fuc(1)	426.9	4	887.126	887.125	0.37		3545.48	3545.48	25.8588	3.5e-06	4.1e-06
		HexNAc(4)Hex(5)Fuc(1)NeuAc(1)	320.4	4	959.894	959.899	-6.09		3836.55	3836.58	26.3443	1.5e-05	1.8e-05
		HexNAc(4)Hex(5)Fuc(1)NeuAc(2)	252	4	1032.67	1032.67	-0.14		4127.67	4127.67	26.7968	9.9e-06	1.2e-05
		HexNAc(4)Hex(5)Fuc(2)	241.7	4	923.638	923.64	-2.7		3691.53	3691.54	25.8322	1.4e-05	1.6e-05
		HexNAc(5)Hex(6)Fuc(1)NeuAc(1)	167.4	4	1051.18	1050.93	1.25	1	4201.7	4200.69	26.2743	0.00011	0.00013
		HexNAc(5)Hex(6)Fuc(1)	187	4	978.402	978.409	-6.66		3910.59	3910.61	25.8232	2.3e-05	2.7e-05
		HexNAc(6)Hex(7)Fuc(1)	193.1	4	1069.69	1069.69	-0.9		4275.74	4275.74	25.7653	1.9e-05	2.3e-05

## Sheet: S6 HILIC C18 HSC3_ICG001
Supplemental Table 6 - HILIC-C18-QTOF-MS/MS Summary of EGFR N-Glycopeptides in HSC-3 Cells + ICG001
041117_HILICC18_HSC3_ICG001
SITE	Peptide Sequence	Glycans	Score	z	Obs._x000D_ m/z	Calc._x000D_ m/z	ppm	Off-_x000D_ By-X	Obs._x000D_ MH	Calc._x000D_ MH	Time (min)	q-value_x000D_ 2D	q-value_x000D_ 1D
N104	R.GNMYYENSYALAVLSNYDANKTGLKELPMR.N	HexNAc(4)Hex(5)Fuc(2)	196	5	1068.88	1068.88	1.27		5340.35	5340.35	28.3282	0.023	0.027
		HexNAc(4)Hex(5)Fuc(2)NeuAc(1)	97.3	5	1127.09	1126.89	-5.11	1	5631.4	5630.42	28.6822	0.066	0.066
N151	R.DIVSSDFLSNMSMDFQNHLGSCQK.C	HexNAc(4)Hex(5)Fuc(1)	517	4	1132.96	1132.71	0.82	1	4528.83	4527.83	28.7922	1.2e-06	1.3e-06
		HexNAc(4)Hex(5)Fuc(1)	137.3	3	1510.29	1510.29	1.76		4528.85	4528.85	2.5236	5.2e-05	5.7e-05
		HexNAc(4)Hex(6)	157.6	4	1136.96	1136.97	-5.9		4544.81	4544.84	28.533	0.00013	0.00014
		HexNAc(4)Hex(5)NeuAc(1)	427.8	4	1169.48	1169.23	4.81	1	4674.91	4673.88	28.7883	4.7e-06	5.3e-06
		HexNAc(4)Hex(5)Fuc(2)	177.9	4	1169.48	1169.48	0.61		4674.91	4674.9	28.7672	1.4e-05	1.5e-05
		HexNAc(4)Hex(5)Fuc(1)NeuAc(1)	345.6	4	1205.74	1205.74	-4.28		4819.92	4819.94	29.1323	5.2e-06	5.8e-06
		HexNAc(4)Hex(5)NeuAc(2)	78.1	5	994.003	993.802	0.41	1	4965.98	4964.98	29.1608	0.0097	0.014
		HexNAc(4)Hex(5)Fuc(2)NeuAc(1)	200.5	4	1242.26	1242.26	-0.19		4966	4966	29.2385	1.2e-05	1.3e-05
		HexNAc(4)Hex(5)Fuc(1)NeuAc(2)	30	4	1278.52	1278.51	1.53		5111.04	5111.04	29.6327	0.0056	0.0056
N328	R.KVCNGIGIGEFKDSLSINATNIK.H	HexNAc(2)Hex(6)	287.6	4	964.945	964.95	-4.86		3856.76	3856.78	26.5153	4.1e-05	4.6e-05
		HexNAc(2)Hex(7)	319.9	4	1005.45	1005.46	-8.99		4018.79	4018.83	26.4733	1.8e-05	2e-05
		HexNAc(2)Hex(8)	265.6	4	1045.98	1045.98	-0.04		4180.88	4180.88	26.4348	2e-05	2.2e-05
N337	K.HFKNCTSISGDLHILPVAFR.G	HexNAc(2)Hex(4)	253.2	4	842.4	842.397	3.63		3366.58	3366.57	26.8737	5.7e-05	6.3e-05
		HexNAc(2)Hex(5)	449.7	4	882.914	882.91	4.4		3528.64	3528.62	26.8182	2.8e-05	3.1e-05
		HexNAc(2)Hex(6)	454.7	4	923.418	923.424	-5.81		3690.65	3690.67	26.8013	1.4e-05	1.6e-05
		HexNAc(2)Hex(7)	343.7	5	771.345	771.351	-7.29		3852.7	3852.73	26.8422	1.2e-05	1.3e-05
		HexNAc(2)Hex(8)	478.7	5	803.759	803.761	-3.27		4014.76	4014.78	26.7797	8e-06	8.8e-06
N389	K.TVKEITGFLLIQAWPENR.T	HexNAc(4)Hex(5)Fuc(2)	125	4	1008.22	1007.96	0.31	1	4029.84	4028.84	29.2465	0.0097	0.0098
		HexNAc(4)Hex(5)Fuc(1)NeuAc(1)	175.3	4	1044.47	1044.48	-8.59		4174.86	4174.89	29.7275	0.0056	0.0056
		HexNAc(4)Hex(5)Fuc(2)NeuAc(1)	143.9	4	1081	1080.74	8.45	1	4320.97	4319.93	29.74	0.0056	0.0056
N420	R.TKQHGQFSLAVVSLNITSLGLR.S	HexNAc(2)Hex(7)	132.4	4	978.218	978.22	-2.22		3909.85	3909.86	29.0448	0.00053	0.00059
		HexNAc(4)Hex(5)Fuc(1)	304.9	4	1035.25	1035.25	1.22		4137.97	4137.97	29.0018	2.4e-05	2.6e-05
		HexNAc(4)Hex(5)NeuAc(1)	303.7	4	1071.5	1071.51	-5.39		4282.98	4283.01	29.6058	1.5e-05	1.6e-05
		HexNAc(4)Hex(5)Fuc(2)	266.9	4	1071.76	1071.76	2.31		4284.04	4284.03	28.9005	2.4e-05	2.7e-05
		HexNAc(4)Hex(5)Fuc(1)NeuAc(1)	377.3	4	1108.02	1108.02	-0.19		4429.06	4429.06	29.5582	1.8e-05	2e-05
		HexNAc(4)Hex(5)Fuc(3)	30	5	887.02	886.823	-3.44	1	4431.07	4430.09	29.561	0.023	0.027
		HexNAc(4)Hex(5)NeuAc(2)	309.4	4	1144.28	1144.28	1.03		4574.11	4574.1	30.1758	0.00019	0.00021
		HexNAc(4)Hex(5)Fuc(2)NeuAc(1)	400.7	4	1144.54	1144.54	3.27		4575.14	4575.12	29.4942	1.7e-05	1.8e-05
		HexNAc(5)Hex(6)NeuAc(1)	138.1	4	1162.78	1162.79	-5.64		4648.11	4648.14	29.5388	0.00039	0.00043
		HexNAc(4)Hex(5)Fuc(1)NeuAc(2)	167.3	4	1180.79	1180.8	-4.17		4720.14	4720.16	30.1688	0.0056	0.0056
N544	R.EFVENSECIQCHPECLPQAMNITCTGRGPDNCIQCAHYIDGPHCVK.T	HexNAc(2)Hex(9)	119.7	6	1228.67	1228.67	-1.08		7366.97	7366.97	25.479	0.039	0.039
		HexNAc(4)Hex(5)NeuAc(1)	215.2	6	1237.01	1236.84	0.66	1	7417.03	7416.02	25.4733	0.00095	0.001
		HexNAc(4)Hex(5)Fuc(1)NeuAc(1)	94.1	6	1261.18	1261.19	-0.9		7562.07	7562.08	25.6842	0.014	0.017
		HexNAc(2)Hex(12)	126.3	6	1309.69	1309.69	-4.91		7853.09	7853.13	25.9392	0.017	0.017
N579	K.TCPAGVMGENNTLVWK.Y	HexNAc(3)Hex(4)Fuc(1)	226.6	3	1060.79	1060.79	0.09		3180.35	3180.35	25.9073	3.5e-05	3.8e-05
		HexNAc(4)Hex(5)Fuc(1)	491	4	887.127	887.125	1.7		3545.49	3545.48	25.919	1.2e-06	1.3e-06
		HexNAc(4)Hex(5)NeuAc(1)	125.2	3	1230.85	1230.84	4.1		3690.53	3690.52	2.6653	3.7e-05	4.1e-05
		HexNAc(4)Hex(5)Fuc(2)	261.6	4	923.638	923.64	-2.45		3691.53	3691.54	25.8318	1.3e-05	1.4e-05
		HexNAc(4)Hex(5)Fuc(1)NeuAc(1)	350.1	4	959.893	959.899	-6.21		3836.55	3836.58	26.3603	3.9e-06	4.3e-06
		HexNAc(5)Hex(6)Fuc(1)	184.1	4	978.413	978.409	4.89		3910.63	3910.61	25.7777	0.00017	0.00019
		HexNAc(4)Hex(5)Fuc(2)NeuAc(1)	251.3	4	996.408	996.414	-6.15		3982.61	3982.63	26.3305	8.7e-06	9.6e-06
		HexNAc(2)Hex(12)	254.5	4	1032.66	1032.66	-0.8		4127.63	4127.63	26.6445	1e-05	1.1e-05
		HexNAc(4)Hex(5)Fuc(1)NeuAc(2)	303.9	4	1032.68	1032.67	1.93		4127.68	4127.67	26.7202	5.1e-06	5.6e-06
		HexNAc(4)Hex(5)Fuc(3)NeuAc(1)	164.3	3	1376.57	1376.9	-0.25	-1	4127.69	4128.69	2.5605	0.0002	0.00022
		HexNAc(5)Hex(6)Fuc(1)NeuAc(1)	327.9	4	1051.18	1051.18	0.28		4201.71	4201.71	26.2327	7.6e-06	8.4e-06
		HexNAc(5)Hex(6)Fuc(1)NeuAc(2)	71.7	4	1123.95	1123.96	-2.66		4492.79	4492.8	26.6613	0.00026	0.00029
		HexNAc(6)Hex(7)Fuc(1)NeuAc(1)	93.3	4	1142.47	1142.47	4.16		4566.86	4566.84	26.0507	0.0056	0.0056
																	0

## Sheet: S7 EGFR Site Occupancy
Supplementary Table 7: EGFR N-Glycosylation Site Occupancy is Unchanged in CAL27 and HSC-3 Cells Treated with DMSO or ICG-001.
		CAL27		HSC3
Site	Peptide	DMSO	ICG001	DMSO	ICG001
N32	R.MFNNCEVVLGNLEITYVQR.N	High	High	High	High
N104	R.GNMYYENSYALAVLSNYDANKTGLK.E	0.405	0.51	0.458	0.598
N151	R.DIVSSDFLSNMSMDFQNHLGSCQK.C	1	0.985	0.978	0.994
N328	K.DSLSINATNIK.H	High	High	High	High
N337	K.NCTSISGDLHILPVAFR.G	High	High	High	High
N389	K.TVKEITGFLLIQAWPENR.T	High	High	High	High
N440	R.TKQHGQFSLAVVSLNITSLGLR.S	High	High	High	High
N603	K.TCPAGVMGENNTLVWK.Y	High	High	High	High
EGFR tryptic peptides were treated with PNGase F in the presence of H218O, the areas of the unmodified and deamidated, 18O-labled
(formerly glycosylated) peptides were extracted, and their ratios calculated. If only the occupied (deamidated, 18O-labled)
peptide was detected, the occupancy is listed as ‘High’.
