# Supplementary material for: β-Catenin/CBP inhibition alters epidermal growth factor receptor fucosylation status in oral squamous cell carcinoma
Source: Royal Society of Chemistry journal article supplement (doi:10.1039/d0mo00009d), 2020-03-11
Supplement: d0mo00009d2.xlsx [file d0mo00009d2.xlsx]

## Sheet: S8 EGFR Site N151 MS-only AREA
	Supplemental Table 8 - EGFR Site N151 Glycopeptide Areas, DMSO v ICG-001 (Extracted Ion Chromatrograms from MS only Analyses)																Yellow: p ≤ 0.05
	N151 (Peptide: DIVSSDFLSNMSMDFQNHLGSCQK)
							HSC3 DMSO					HSC3 ICG001						p-value
Glycan Composition	Observed m/z	z	Error (ppm)	Score	Scan #	Scan Time (min)	Rel. Int. Repl. 1	Rel. Int. Repl. 2	Rel. Int. Repl. 3	Average	Std Dev	Rel. Int. Repl. 1	Rel. Int. Repl. 2	Rel. Int. Repl. 3	Average	Std Dev
N4H5F1	1510.29	3	0	556.44	8593	32.5783	0.870056	0.803611	0.887073	0.85358	0.0360099	0.711543	0.661311	0.709273	0.694042	0.0231629		0.00621429
N4H5F1S1	1205.73	4	-4.85	320.7			0.0935757	0.109081	0.044816	0.082491	0.027382	0.108462	0.153988	0.0990424	0.120497	0.0239913		0.213881
N4H5F2	1558.97	3	-0.6	177.39	8590	32.5578	0.0363683	0.0873079	0.0681114	0.0639292	0.0210052	0.179994	0.184701	0.191685	0.18546	0.00480265		0.00133882
#FUC
1							0.963632	0.912692	0.931889	0.936071	0.0210052	0.820006	0.815299	0.808315	0.81454	0.00480265		0.00133882
2							0.0363683	0.0873079	0.0681114	0.0639292	0.0210052	0.179994	0.184701	0.191685	0.18546	0.00480265		0.00133882

## Sheet: S9 EGFR Site N389 MS-only AREA
Supplemental Table 9 - EGFR Site N389 Glycopeptide Areas, DMSO v ICG-001 (Extracted Ion Chromatrograms from MS only Analyses)
N389 (Peptide: TVKEITGFLLIQAWPENRTDLHAFENLEIIR)				CAL27 DMSO					CAL27 ICG001						HSC3 DMSO					HSC3 ICG001
Glycan	Observed m/z	z	Error (ppm)	Rel. Int. Repl. 1	Rel. Int. Repl. 2	Rel. Int. Repl. 3	Avg.	S.D.	Rel. Int. Repl. 1	Rel. Int. Repl. 2	Rel. Int. Repl. 3	Avg.	S.D.	p-value CAL27	Rel. Int. Repl. 1	Rel. Int. Repl. 2	Rel. Int. Repl. 3	Avg.	S.D.	Rel. Int. Repl. 1	Rel. Int. Repl. 2	Rel. Int. Repl. 3	Avg.	S.D.	p-value HSC3		p-value CAL27 v HSC3
N3H4F1	1268.37	4	0.9	0	0	0	0	0	0	0	0	0	0		0.01766	0.0149348	0.0155635	0.0160528	0.00116511	0.0211996	0.0219475	0.0220859	0.0217443	0.000389301	0.00280519
N3H4F1S1	1073.12	5	-0.4	0	0	0	0	0	0.00334501	0.00303576	0.00182116	0.00273398	0.000657693		0.0280864	0.0068592	0.016853	0.0172662	0.00867087	0.0100724	0.0119941	0.0128259	0.0116308	0.00115308	0.413777
N4H5F1	1087.93	5	0.2	0.0105279	0.00872626	0.0266007	0.015285	0.0080352	0.0494351	0.0173384	0.0195845	0.028786	0.0146299	0.316464	0.14976	0.147292	0.149327	0.148793	0.00107612	0.163845	0.195013	0.175609	0.178155	0.0128512	0.0322822		2.01453e-05
N4H5F1S1	1146.15		0.3	0.471001	0.520887	0.523408	0.505099	0.0241327	0.46846	0.475113	0.493724	0.479099	0.0106925	0.236039	0.51108	0.499018	0.498951	0.503016	0.0057023	0.428433	0.405112	0.436107	0.423217	0.0131804	0.00141696		0.911186
N4H5F1S2	1204.36	5	-0.5	0.390664	0.332253	0.264939	0.329285	0.0513696	0.269225	0.289464	0.274357	0.277682	0.00859043	0.233772	0.210286	0.25439	0.214159	0.226278	0.019941	0.17946	0.153854	0.153815	0.162376	0.0120799	0.0178996		0.057364
N4H5F2	1396.17	4	0.5	0.0106664	0.0125519	0.0153339	0.0128508	0.00191715	0.0291909	0.0246105	0.0288602	0.0275538	0.00208562	0.00183425	0.0269237	0.0325833	0.0458802	0.0351291	0.00794556	0.0799535	0.0863115	0.0810151	0.0824267	0.00278097	0.00135858		0.0182302
N4H5F2S1	1175.36	5	0.1	0.0866315	0.107263	0.136251	0.110049	0.0203528	0.137323	0.147954	0.138999	0.141425	0.00466695	0.100768	0.0487459	0.0386435	0.0545992	0.0473296	0.00659044	0.0844905	0.0912289	0.0899693	0.0885629	0.00292518	0.00127036		0.0143055
N4H5F3	1146.35	5	-0.1	0.0305094	0.0183188	0.0334661	0.0274314	0.00655569	0.0430216	0.0424846	0.0426538	0.04272	0.000224168	0.0300411	0.00745774	0.00627935	0.00466789	0.00613499	0.00114351	0.0325467	0.0345393	0.0285724	0.0318862	0.00248036	0.000182913		0.0106113
				1	1	1			1	1	1				1	1	1
Yellow: p ≤ 0.05
FUC
0
1				0.872193	0.861866	0.814949	0.849669	0.0249104	0.790465	0.784951	0.789487	0.788301	0.00240221	0.0256326	0.916873	0.922494	0.894853	0.911406	0.0119281	0.803009	0.78792	0.800443	0.797124	0.00659199	0.000289497		0.0341438
2				0.0972979	0.119815	0.151585	0.1229	0.0222698	0.166514	0.172565	0.167859	0.168979	0.00259409	0.0438285	0.0756696	0.0712268	0.100479	0.0824586	0.0128711	0.164444	0.17754	0.170984	0.17099	0.00534661	0.000849928		0.0902609
3				0.0305094	0.0183188	0.0334661	0.0274314	0.00655569	0.0430216	0.0424846	0.0426538	0.04272	0.000224168	0.0300411	0.00745774	0.00627935	0.00466789	0.00613499	0.00114351	0.0325467	0.0345393	0.0285724	0.0318862	0.00248036	0.000182913		0.0106113
No Fuc
FUC				1	1	1			1	1	1				1	1	1			1	1	1

## Sheet: S10A EGFR N420 MS-only AREA
Supplemental Table 10A - EGFR Site N420 Glycopeptide Areas, DMSO v ICG-001 (Extracted Ion Chromatrograms from MS only Analyses)
N410 (Peptide: TKQHGQFSLAVVSLNITSLGLR)							CAL27 DMSO		CAL27 ICG001			HSC3 DMSO		HSC3 ICG001
Glycan	m/z	z	Error (ppm)	Byonic Score	Scan #	RT (min)	Rel. Int. Average	Rel. Int. Std Dev	Rel. Int. Average	Rel. Int. Std Dev	CAL27 p-value	Rel. Int. Average	Rel. Int. Std Dev	Rel. Int. Average	Rel. Int. Std Dev	HSC3 p-value		CAL27 v HSC3
N2H3	816.167	4	0.2	1068.48	8707	33.02	0.0120815	0.00122986	0.0473231	0.00502273	0.000648127	0.0474594	0.00366567	0.0539399	0.00337203	0.139591		0.000205744
N2H4	856.681	4				ND	0	0	0.00177483	0.00101635	0.0689754	0.00315607	0.000462639	0.00378312	0.000510994	0.267684		0.000645643
N2H5	897.193	4	-0.1	568.29	8639	32.85	0.00959395	0.00190062	0.0140691	0.00107301	0.0441325	0.0228612	0.0011609	0.024158	0.00189633	0.455808		0.00108695
N2H6	937.707	4	-0.3	778.29	8779	32.73	0.00452889	0.00203408	0.00532228	0.001551	0.683573	0.0889385	0.00552139	0.0727249	0.00350653	0.0247696		3.48544e-05
N2H7	978.22	4	-0.1	696.8	8771	32.68	0.00284742	0.00110007	0.00325995	0.000537554	0.658586	0.0594799	0.00530562	0.048105	0.00329459	0.0616009		0.000121954
N2H8	1018.73	4				32.67	0.0132943	0.00244536	0.0118367	0.00123484	0.493636	0.0225721	0.00131253	0.0194127	0.000652959	0.0381058		0.00911995
N2H9	1059.25	4	0.4	449.58	8751	32.56	0.0184254	0.00203325	0.0132446	0.00246048	0.0833523	0.00993663	0.00200957	0.00924761	0.00151774	0.718508		0.0137026
N3H3	866.937	4	0.4	303.54	8675	ND	0	0	0.00627653	0.000435767	3.42993e-05	0.0117415	0.00313161	0.00737784	0.000189785	0.120582		0.00607732
N3H6F1	1024.99	4	-0.2	169.26	9070	32.7019	0.00230445	0.000508785	0.00411886	0.000720261	0.0436873	0	0	0	0	-		0.00305138
N3H6S1	1061.25	4	0.3	108.11	9438	33.9922	0.0113996	0.00121266	0.0210541	0.00207554	0.00474228	0.0159806	0.000613127	0.01078	0.00102301	0.00351068		0.00885526
N4H4S1	1030.99	4	-1	372.8	9021	34.07	0.000733664	0.00103756	0.00783302	0.00149412	0.00526091	0.00836095	0.00189092	0.0139807	0.00219073	0.0515724		0.00748493
N4H5	998.734	4	0.5	466.82	8598	32.67	0.0143788	0.00266311	0.0150368	0.00157805	0.778695	0.0481881	0.00150532	0.0519157	0.00289744	0.181717		9.78517e-05
N4H5F1	1035.25	4	0.5	513.94	8712	32.5326	0.0494567	0.00305272	0.0490179	0.00465856	0.916654	0.0398642	0.00842425	0.104533	0.0161049	0.00732381		0.204589
N4H5F1S1	1108.02	4	0.2	771.69	9392	33.7934	0.190953	0.0211942	0.131354	0.0290252	0.0789271	0.108086	0.00275797	0.136615	0.00887486	0.01224		0.00538724
N4H5F1S2	1180.8	4	1.1	102.67	9229	34.9838	0.0102438	0.00313999	0.0223169	0.00176349	0.0090304	0.014834	0.00762125	0.0127052	0.00147241	0.717877		0.475006
N4H5F2	1071.76	4	0.1	570.56	8587	32.56	0.0381718	0.00197557	0.0472536	0.00660717	0.13602	0.0183881	0.00234748	0.0568298	0.00227004	7.62648e-05		0.000802286
N4H5F2S1	1144.54	4	-0.2	391.5	8896	33.8127	0.106988	0.00371093	0.10824	0.00834507	0.855721	0.0278422	0.0234854	0.0359034	0.00579792	0.662002		0.00925683
N4H5F3	1108.28	4	0.3	211.26	9011	32.4752	0.0138762	0.00181272	0.0184755	0.00222817	0.0862547	0.000132808	0.000187819	0.010457	0.000931776	0.000104793		0.000437799
N4H5S1	1071.51	4	0	753.23	8920	33.9698	0.315016	0.0127443	0.223081	0.0183846	0.0043614	0.306701	0.016987	0.18922	0.050642	0.0358569		0.609253
N4H5S2	1144.28	4	0	719.18	9236	35.0718	0.17508	0.0272433	0.221688	0.0103314	0.0864649	0.142422	0.00174363	0.133407	0.00634131	0.124607		0.165936
N5H6F1	1126.53	4				32.5	0	0	0.00547343	0.000972978	0.00135223	0	0	0.00184592	0.000146705	5.86049e-05		-
N5H6F1S2	1272.08	4	-0.6	204.38	9193	34.98	0	0	0.00344815	0.00111966	0.0121072	0	0	0	0	-		-
N5H6F2	1163.05	4				32.48	0	0	0.00313293	0.000489053	0.00082268	0	0	0	0	-		-
N5H6F2S1	1235.82	4	1.2	125.26	8843	33.51	0.00431404	0.00228706	0.0102052	0.000688377	0.025163	0	0	0	0	-		0.0559451
N5H6S2	1235.56	4	-0.2	205.88	9314	34.9195	0.00631236	0.00125182	0.00516379	0.000560421	0.301855	0.00276648	0.000314179	0.00305858	0.000493515	0.519083		0.0177599
N5H6S3	1308.34	4	-0.7	162.83	10069	36.2887	0	0	0	0	-	0.000288344	0.000212261	0	0	-		0.127107
Perform F-test to determine if samples have equal variance
F-test (CAL27 DMSO v ICG001)	assumption that variance is equal (b/c F-test is NOT less than 0.05)
F-test (HSC3 DMSO v ICG001)	assumption that variance is equal (b/c F-test is NOT less than 0.05)
F-test (CAL27 v HSC3)	assumption that variance is equal (b/c F-test is NOT less than 0.05)
Therefore, use a 2-tailed t-test with two-sample equal variance (homoscedatstic)
Yellow: p ≤ 0.05

## Sheet: S10B EGFR N420 Fuc Status
Supplemental Table 10B - EGFR Site N420 Fucosylation Status, Based on Glycopeptide Areas, DMSO v ICG-001 (Extracted Ion Chromatrograms from MS only Analyses)
	CAL27 DMSO					CAL27 ICG001					HSC3 DMSO					HSC3 ICG001						p-value CAL27vHSC3		p-value CAL27 D v I		p-value HSC3 D v I
	1	2	3	Average	Std Dev	1	2	3	Average	Std Dev	1	2	3	Average	Std Dev	1	2	3	Average	Std Dev
PAUCI	0.0131663	0.0103617	0.0127163	0.0120815	0.00150627	0.0484115	0.0565737	0.0423084	0.0490979	0.00715736	0.0535816	0.0534404	0.0448244	0.0506155	0.00501571	0.0593504	0.0609261	0.0528926	0.057723	0.00425683		0.000150798		0.000933711		0.134627
HM	0.0547329	0.0397636	0.0515736	0.04869	0.00789026	0.0440252	0.0539876	0.045185	0.0477326	0.00544793	0.192977	0.216471	0.201917	0.203788	0.0118582	0.170819	0.187396	0.162729	0.173648	0.012574		1.62288e-05		0.87109		0.0391457
COMPL	0.932101	0.949875	0.93571	0.939229	0.00939484	0.907563	0.889439	0.912507	0.90317	0.0121454	0.753441	0.730089	0.753259	0.745596	0.0134302	0.76983	0.751678	0.784378	0.768629	0.0163829		2.29811e-05		0.0152543		0.132792
FUC	0.431283	0.425872	0.39177	0.416308	0.0214225	0.391968	0.393376	0.423765	0.403036	0.0179649	0.204592	0.173885	0.248965	0.209147	0.0377467	0.350095	0.394741	0.331832	0.358889	0.0323638		0.00118463		0.457144		0.0064439
NOT FUC	0.568717	0.574128	0.60823	0.583692	0.0214225	0.608032	0.606624	0.576235	0.596964	0.0179649	0.795408	0.826115	0.751035	0.790853	0.0377467	0.649905	0.605259	0.668168	0.641111	0.0323638
NEUAC	0.80736	0.838314	0.817448	0.821041	0.015787	0.761496	0.721686	0.77997	0.754384	0.0297857	0.62255	0.624228	0.635066	0.627281	0.00679386	0.533205	0.495118	0.578687	0.53567	0.0418388		3.78016e-05		0.0266626		0.0200596
NOT NEUAC	0.19264	0.161686	0.182552	0.178959	0.015787	0.238504	0.278314	0.22003	0.245616	0.0297857	0.37745	0.375772	0.364934	0.372719	0.00679386	0.466795	0.504882	0.421313	0.46433	0.0418388
#FUC
0	0.568717	0.574128	0.60823	0.583692	0.0214225	0.608032	0.606624	0.576235	0.596964	0.0179649	0.795408	0.826115	0.751035	0.790853	0.0377467	0.649905	0.605259	0.668168	0.641111	0.0323638		0.00118463		0.457144		0.0064439
1	0.268391	0.270096	0.220387	0.252958	0.02822	0.220991	0.185811	0.240386	0.215729	0.0276652	0.171831	0.14378	0.172742	0.162784	0.0164645	0.250753	0.279894	0.236449	0.255699	0.0221407		0.00712237		0.178079		0.00430546
2	0.151578	0.140527	0.156317	0.149474	0.00810267	0.15534	0.186485	0.16467	0.168832	0.0159839	0.0323635	0.0301049	0.0762227	0.0462304	0.0259987	0.0901945	0.103613	0.0843918	0.0927332	0.00985908		0.00231721		0.134676		0.0442613
3	0.0113148	0.0152486	0.0150653	0.0138762	0.00222012	0.0156374	0.0210803	0.0187089	0.0184755	0.00272894	0.000398424	0	0	0.000132808	0.00023003	0.00914678	0.0112337	0.0109906	0.010457	0.00114119		0.000419202		0.0862547		0.000104793
																					CHANGE Y AXIS LABELS - ITS % AREA, and its compared to total area for all N420 glycopeptides
													DMSO		ICG001
													%	StDev	%	StDev
												CAL27	0.416308	0.0214225	0.403036	0.0179649
												HSC3	0.209147	0.0377467	0.358889	0.0323638

## Sheet: S11 EGFR Site N579 MS-only AREA
Supplemental Table 11 - EGFR Site N579 Glycopeptide Areas, DMSO v ICG-001 (Extracted Ion Chromatrograms from MS only Analyses)
Site N579 (peptide: TCPAGVMGENNTLVWK)					CAL27 DMSO					CAL27 ICG001						HSC3 DMSO					HSC3 ICG001
Glycan Composition	Observed m/z	z	Error (ppm)	Time (min)	Rel. Int. Repl. 1	Rel. Int. Repl. 2	Rel. Int. Repl. 3	Avg.	S.D.	Rel. Int. Repl. 1	Rel. Int. Repl. 2	Rel. Int. Repl. 3	Avg.	S.D.	p-value CAL27	Rel. Int. Repl. 1	Rel. Int. Repl. 2	Rel. Int. Repl. 3	Avg.	S.D.	Rel. Int. Repl. 1	Rel. Int. Repl. 2	Rel. Int. Repl. 3	Avg.	S.D.	p-value HSC3		p-value CAL27 v HSC3
N2H8	1160.48	3		24.35	0.0477949	0.0541674	0.0582607	0.0534076	0.00527407	0.0351685	0.0513994	0.0506905	0.0457528	0.00917316	0.278445	0.0142077	0.0145232	0.016218	0.014983	0.000882771	0.00735122	0.00714684	0.00634588	0.00694798	0.000433849	0.000320681		0.00024609
N2H9	1214.49	3		24.23	0.0837915	0.0771505	0.0786567	0.0798662	0.00348179	0.0308878	0.0501327	0.0607872	0.0472692	0.015154	0.022138	0.0148801	0.0165054	0.0147118	0.0153658	0.000808757	0.0117297	0.00967463	0.00882468	0.0100763	0.00121953	0.00692505		6.568e-06
N3H4F1	1060.79	3	-0.5	24.3249	0	0	0	0	0	0	0	0	0	0		0.00631395	0.00378675	0.00278217	0.00429429	0.00148584	0.0103756	0.0100981	0.00957229	0.0100153	0.00033314	0.00603254
N4H5F1	1182.5	3	-0.5	24.1602	0.112526	0.0700081	0.0736046	0.0853794	0.0235779	0.0543142	0.0274617	0.0191526	0.0336428	0.0183777	0.0400369	0.606074	0.626623	0.620725	0.617807	0.00863913	0.493989	0.483788	0.478951	0.485576	0.00626801	6.23162e-05		3.68113e-06
N4H5F1S1	1279.53	3		25.24	0.578724	0.435634	0.488097	0.500818	0.0723879	0.414591	0.460904	0.499971	0.458488	0.0427412	0.432344	0.198154	0.188425	0.195938	0.194172	0.00416353	0.253134	0.24599	0.240151	0.246425	0.00530903	0.000394749		0.00185404
N4H5F1S2	1376.57		-1.9	26.6302	0.0176373	0.0997306	0.061961	0.0597763	0.0410902	0.231053	0.296312	0.258279	0.261881	0.0327782	0.00264054	0.0183776	0.011192	0.0124411	0.0140035	0.00313464	0.0140365	0.0446846	0.040128	0.0329497	0.0135024	0.125386		0.127116
N4H5F2	1231.19	3		24.3	0.0620092	0.165927	0.174665	0.1342	0.0626719	0.086294	0.0997954	0.10301	0.0963663	0.00886967	0.359013	0.0845459	0.0865869	0.0820754	0.0844027	0.00184456	0.126551	0.115199	0.123244	0.121665	0.00476716	0.000499443		0.24102
N4H5F2S1	1328.22	3		25.2	0.0759051	0.0706356	0.0556714	0.067404	0.0104968	0.143644	0	0	0.0478813	0.0829329	0.706538	0.00384188	0.000973115	0.000807847	0.00187428	0.00139294	0.0285476	0.0218401	0.0259076	0.0254318	0.00275893	0.000419997		0.000436546
N5H6F1	1304.21	3	0.2	23.9394	0.0216129	0.0267465	0.00908348	0.0191476	0.00908592	0.00404786	0.0139952	0.0081109	0.00871797	0.00500136	0.156514	0.0536057	0.0513853	0.0543004	0.0530971	0.0012432	0.0542863	0.0615788	0.0668754	0.0609135	0.00516099	0.10575		0.00309159
#FUC
0					0.131586	0.131318	0.136917	0.133274	0.00257866	0.0660563	0.101532	0.111478	0.093022	0.0194952	0.0443522	0.0290878	0.0310286	0.0309299	0.0303487	0.000892553	0.0190809	0.0168215	0.0151706	0.0170243	0.00160284	0.000506649		7.39355e-07
1					0.730499	0.632119	0.632747	0.665122	0.0462296	0.704006	0.798672	0.785513	0.76273	0.0418707	0.0913059	0.882525	0.881411	0.886187	0.883374	0.00204005	0.825821	0.84614	0.835677	0.835879	0.00829643	0.00141451		0.00262541
2					0.137914	0.236563	0.230336	0.201604	0.0451074	0.229938	0.0997954	0.10301	0.144248	0.0606065	0.343431	0.0883877	0.08756	0.0828833	0.086277	0.0024234	0.155098	0.137039	0.149152	0.147096	0.00751469	0.000403171		0.0225455
			No Fuc
			Fuc		0.868414	0.868682	0.863083	0.866726	0.00257866	0.933944	0.898468	0.888522	0.906978	0.0194952	0.0443522	0.970912	0.968971	0.96907	0.969651	0.000892553	0.980919	0.983179	0.984829	0.982976	0.00160284	0.000506649		7.39355e-07
