# Supplementary material for: β-Catenin/CBP inhibition alters epidermal growth factor receptor fucosylation status in oral squamous cell carcinoma
Source: Royal Society of Chemistry journal article supplement (doi:10.1039/d0mo00009d), 2020-03-11
Supplement: d0mo00009d3.xlsx [file d0mo00009d3.xlsx]

## Sheet: S12 CAL27_DMSO_Mascot_F023038
Supplemental Table 12 - EGFR Peptides from CAL27 cells + DMSO (Mascot Search Results)
Header	--------------------------------------------------------
Search title
Timestamp	2019-09-11T21:11:28Z
User
Email
Report URI	http://bumc-arizona.bumc.bu.edu/mascot/cgi/master_results.pl?file=../data/20190911/F023038.dat
Peak list data path	C:\Users\kbc36\KBC\PROTOCOLS\BUMC_247_EGFR_MSonly\20190910_HCDtrigEThcD\20190910_CAL27_DMSO_EGFR_IP_1_10th.mgf
Peak list format	Mascot generic
Search type	MIS
Mascot version	2.4.1
Database	SwissProt
Fasta file	SwissProt_2013_01.fasta
Total sequences	538849
Total residues	191337357
Sequences after taxonomy filter	20233
Number of queries	10261
Fixed modifications	--------------------------------------------------------
Identifier	Name	Delta	Neutral loss
1	Carbamidomethyl (C)	57.0215
Variable modifications	--------------------------------------------------------
Identifier	Name	Delta	Neutral loss(es)
1	Oxidation (M)	15.9949	0	63.9983
Search Parameters	--------------------------------------------------------
Taxonomy filter	. . . . . . . . . . . . . . . . Homo sapiens (human)
Enzyme	Trypsin
Maximum Missed Cleavages	2
Fixed modifications	Carbamidomethyl (C)
Variable modifications	Oxidation (M)
Peptide Mass Tolerance	10
Peptide Mass Tolerance Units	ppm
Fragment Mass Tolerance	0.1
Fragment Mass Tolerance Units	Da
Mass values	Monoisotopic
Instrument type	Default
Format parameters	--------------------------------------------------------
Significance threshold	0.05
Max. number of hits	0
Use MudPIT protein scoring	1
Ions score cut-off	0
Include same-set proteins	0
Include sub-set proteins	1
Include unassigned	0
Require bold red	0
Use homology threshold	1
Group protein families	1
Protein hits	--------------------------------------------------------
prot_hit_num	prot_family_member	prot_acc	prot_desc	prot_score	prot_mass	prot_matches	prot_matches_sig	prot_sequences	prot_sequences_sig	pep_query	pep_rank	pep_isbold	pep_isunique	pep_exp_mz	pep_exp_mr	pep_exp_z	pep_calc_mr	pep_delta	pep_miss	pep_score	pep_expect	pep_res_before	pep_seq	pep_res_after	pep_var_mod	pep_var_mod_pos	pep_summed_mod_pos	pep_scan_title
1	1	EGFR_HUMAN	Epidermal growth factor receptor OS=Homo sapiens GN=EGFR PE=1 SV=2	10561	137612	303	272	104	97	832	1	1	1	432.745	863.475	2	863.475	-0.0003	0	51.27	5.4e-05	K	ITDFGLAK	L				File4189 Spectrum2452 scans: 4952
1	1	EGFR_HUMAN	Epidermal growth factor receptor OS=Homo sapiens GN=EGFR PE=1 SV=2	10561	137612	303	272	104	97	833	1	1	1	432.745	863.476	2	863.475	0.0005	0	51.46	5.3e-05	K	ITDFGLAK	L				File4189 Spectrum2485 scans: 5006
1	1	EGFR_HUMAN	Epidermal growth factor receptor OS=Homo sapiens GN=EGFR PE=1 SV=2	10561	137612	303	272	104	97	1443	1	1	1	489.779	977.543	2	977.543	0	0	46.51	0.00012	R	ELIIEFSK	M				File4189 Spectrum3857 scans: 6773
1	1	EGFR_HUMAN	Epidermal growth factor receptor OS=Homo sapiens GN=EGFR PE=1 SV=2	10561	137612	303	272	104	97	1566	1	1	1	499.224	996.433	2	996.433	0.0001	0	33.83	0.0012	K	GMNYLEDR	R				File4189 Spectrum1856 scans: 4165
1	1	EGFR_HUMAN	Epidermal growth factor receptor OS=Homo sapiens GN=EGFR PE=1 SV=2	10561	137612	303	272	104	97	1567	1	1	1	499.224	996.434	2	996.433	0.0006	0	42.45	0.00017	K	GMNYLEDR	R				File4189 Spectrum1902 scans: 4228
1	1	EGFR_HUMAN	Epidermal growth factor receptor OS=Homo sapiens GN=EGFR PE=1 SV=2	10561	137612	303	272	104	97	1568	1	1	1	499.224	996.434	2	996.433	0.0009	0	18.55	0.042	K	GMNYLEDR	R				File4189 Spectrum1948 scans: 4295
1	1	EGFR_HUMAN	Epidermal growth factor receptor OS=Homo sapiens GN=EGFR PE=1 SV=2	10561	137612	303	272	104	97	1587	1	1	1	500.261	998.507	2	998.507	-0.0001	0	19.69	0.014	R	NYDLSFLK	T				File4189 Spectrum4269 scans: 7248
1	1	EGFR_HUMAN	Epidermal growth factor receptor OS=Homo sapiens GN=EGFR PE=1 SV=2	10561	137612	303	272	104	97	1618	1	1	1	504.292	1006.57	2	1006.57	0.0004	1	28.6	0.0061	R	ILKETEFK	K				File4189 Spectrum1035 scans: 3129
1	1	EGFR_HUMAN	Epidermal growth factor receptor OS=Homo sapiens GN=EGFR PE=1 SV=2	10561	137612	303	272	104	97	1747	1	1	1	516.745	1031.47	2	1031.47	-0.0002	0	7.49	0.78	K	YSFGATCVK	K				File4189 Spectrum2190 scans: 4611
1	1	EGFR_HUMAN	Epidermal growth factor receptor OS=Homo sapiens GN=EGFR PE=1 SV=2	10561	137612	303	272	104	97	1748	1	1	1	516.745	1031.47	2	1031.47	0.0003	0	50.89	3.5e-05	K	YSFGATCVK	K				File4189 Spectrum1914 scans: 4248
1	1	EGFR_HUMAN	Epidermal growth factor receptor OS=Homo sapiens GN=EGFR PE=1 SV=2	10561	137612	303	272	104	97	1749	1	1	1	516.745	1031.48	2	1031.47	0.0004	0	21.49	0.031	K	YSFGATCVK	K				File4189 Spectrum2006 scans: 4372
1	1	EGFR_HUMAN	Epidermal growth factor receptor OS=Homo sapiens GN=EGFR PE=1 SV=2	10561	137612	303	272	104	97	1750	1	1	1	516.745	1031.48	2	1031.47	0.0008	0	51.07	3.5e-05	K	YSFGATCVK	K				File4189 Spectrum1958 scans: 4309
1	1	EGFR_HUMAN	Epidermal growth factor receptor OS=Homo sapiens GN=EGFR PE=1 SV=2	10561	137612	303	272	104	97	1751	1	1	1	516.745	1031.48	2	1031.47	0.0011	0	11.2	0.089	K	YSFGATCVK	K				File4189 Spectrum2056 scans: 4438
1	1	EGFR_HUMAN	Epidermal growth factor receptor OS=Homo sapiens GN=EGFR PE=1 SV=2	10561	137612	303	272	104	97	1763	1	1	1	519.721	1037.43	2	1037.43	0	0	71.83	1e-07	R	ESDCLVCR	K				File4189 Spectrum659 scans: 2672
1	1	EGFR_HUMAN	Epidermal growth factor receptor OS=Homo sapiens GN=EGFR PE=1 SV=2	10561	137612	303	272	104	97	1764	1	1	1	519.721	1037.43	2	1037.43	0.0001	0	29.4	0.0018	R	ESDCLVCR	K				File4189 Spectrum938 scans: 3016
1	1	EGFR_HUMAN	Epidermal growth factor receptor OS=Homo sapiens GN=EGFR PE=1 SV=2	10561	137612	303	272	104	97	1765	1	1	1	519.721	1037.43	2	1037.43	0.0003	0	71.45	1.2e-07	R	ESDCLVCR	K				File4189 Spectrum771 scans: 2813
1	1	EGFR_HUMAN	Epidermal growth factor receptor OS=Homo sapiens GN=EGFR PE=1 SV=2	10561	137612	303	272	104	97	1766	1	1	1	519.721	1037.43	2	1037.43	0.0005	0	34.26	0.00062	R	ESDCLVCR	K				File4189 Spectrum580 scans: 2570
1	1	EGFR_HUMAN	Epidermal growth factor receptor OS=Homo sapiens GN=EGFR PE=1 SV=2	10561	137612	303	272	104	97	1767	1	1	1	519.721	1037.43	2	1037.43	0.0006	0	71.87	1e-07	R	ESDCLVCR	K				File4189 Spectrum715 scans: 2743
1	1	EGFR_HUMAN	Epidermal growth factor receptor OS=Homo sapiens GN=EGFR PE=1 SV=2	10561	137612	303	272	104	97	1768	1	1	1	519.721	1037.43	2	1037.43	0.0007	0	46.58	3.5e-05	R	ESDCLVCR	K				File4189 Spectrum835 scans: 2895
1	1	EGFR_HUMAN	Epidermal growth factor receptor OS=Homo sapiens GN=EGFR PE=1 SV=2	10561	137612	303	272	104	97	1859	1	1	1	533.799	1065.58	2	1065.58	0.0007	1	5.9	0.28	K	LFGTSGQKTK	I				File4189 Spectrum351 scans: 2285
1	1	EGFR_HUMAN	Epidermal growth factor receptor OS=Homo sapiens GN=EGFR PE=1 SV=2	10561	137612	303	272	104	97	1983	1	1	1	544.264	1086.51	2	1086.51	0.0004	0	12.34	0.28	K	CNLLEGEPR	E				File4189 Spectrum1972 scans: 4326
1	1	EGFR_HUMAN	Epidermal growth factor receptor OS=Homo sapiens GN=EGFR PE=1 SV=2	10561	137612	303	272	104	97	1984	1	1	1	544.264	1086.51	2	1086.51	0.0009	0	31.83	0.0031	K	CNLLEGEPR	E				File4189 Spectrum1920 scans: 4257
1	1	EGFR_HUMAN	Epidermal growth factor receptor OS=Homo sapiens GN=EGFR PE=1 SV=2	10561	137612	303	272	104	97	2013	1	1	1	546.788	1091.56	2	1091.56	0.0003	0	58.7	1.4e-05	R	YLVIQGDER	M				File4189 Spectrum1994 scans: 4356
1	1	EGFR_HUMAN	Epidermal growth factor receptor OS=Homo sapiens GN=EGFR PE=1 SV=2	10561	137612	303	272	104	97	2014	1	1	1	546.788	1091.56	2	1091.56	0.0008	0	58.87	1.6e-05	R	YLVIQGDER	M				File4189 Spectrum2042 scans: 4419
1	1	EGFR_HUMAN	Epidermal growth factor receptor OS=Homo sapiens GN=EGFR PE=1 SV=2	10561	137612	303	272	104	97	2047	1	1	1	549.835	1097.66	2	1097.66	0.0002	1	19.35	0.051	R	DLAARNVLVK	T				File4189 Spectrum1835 scans: 4139
1	1	EGFR_HUMAN	Epidermal growth factor receptor OS=Homo sapiens GN=EGFR PE=1 SV=2	10561	137612	303	272	104	97	2077	1	1	1	553.276	1104.54	2	1104.55	-0.0068	0	24.19	0.043	R	VAPQSSEFIGA	-				File4189 Spectrum2734 scans: 5321
1	1	EGFR_HUMAN	Epidermal growth factor receptor OS=Homo sapiens GN=EGFR PE=1 SV=2	10561	137612	303	272	104	97	2078	1	1	1	553.28	1104.55	2	1104.55	0.0011	0	24.67	0.039	R	VAPQSSEFIGA	-				File4189 Spectrum2846 scans: 5466
1	1	EGFR_HUMAN	Epidermal growth factor receptor OS=Homo sapiens GN=EGFR PE=1 SV=2	10561	137612	303	272	104	97	2079	1	1	1	553.281	1104.55	2	1104.55	0.0018	0	24.31	0.041	R	VAPQSSEFIGA	-				File4189 Spectrum2789 scans: 5393
1	1	EGFR_HUMAN	Epidermal growth factor receptor OS=Homo sapiens GN=EGFR PE=1 SV=2	10561	137612	303	272	104	97	2234	1	1	1	568.34	1134.66	2	1134.66	-0.0002	2	30.23	0.0021	R	ILKETEFKK	I				File4189 Spectrum448 scans: 2412
1	1	EGFR_HUMAN	Epidermal growth factor receptor OS=Homo sapiens GN=EGFR PE=1 SV=2	10561	137612	303	272	104	97	2235	1	1	1	379.229	1134.67	3	1134.66	0.0008	2	35.47	0.00087	R	ILKETEFKK	I				File4189 Spectrum440 scans: 2402
1	1	EGFR_HUMAN	Epidermal growth factor receptor OS=Homo sapiens GN=EGFR PE=1 SV=2	10561	137612	303	272	104	97	2322	1	1	1	577.275	1152.53	2	1152.53	0.0003	1	21.27	0.01	K	GMNYLEDRR	L				File4189 Spectrum1307 scans: 3474
1	1	EGFR_HUMAN	Epidermal growth factor receptor OS=Homo sapiens GN=EGFR PE=1 SV=2	10561	137612	303	272	104	97	2323	1	1	1	577.275	1152.54	2	1152.53	0.0006	1	25.56	0.0043	K	GMNYLEDRR	L				File4189 Spectrum1241 scans: 3393
1	1	EGFR_HUMAN	Epidermal growth factor receptor OS=Homo sapiens GN=EGFR PE=1 SV=2	10561	137612	303	272	104	97	2324	1	1	1	385.186	1152.54	3	1152.53	0.0013	1	22.5	0.0078	K	GMNYLEDRR	L				File4189 Spectrum1247 scans: 3400
1	1	EGFR_HUMAN	Epidermal growth factor receptor OS=Homo sapiens GN=EGFR PE=1 SV=2	10561	137612	303	272	104	97	2325	1	1	1	385.186	1152.54	3	1152.53	0.0014	1	6.03	0.27	K	GMNYLEDRR	L				File4189 Spectrum1316 scans: 3484
1	1	EGFR_HUMAN	Epidermal growth factor receptor OS=Homo sapiens GN=EGFR PE=1 SV=2	10561	137612	303	272	104	97	2369	1	1	1	580.792	1159.57	2	1159.57	0.0003	1	49.88	2.1e-05	K	YSFGATCVKK	C				File4189 Spectrum1224 scans: 3371
1	1	EGFR_HUMAN	Epidermal growth factor receptor OS=Homo sapiens GN=EGFR PE=1 SV=2	10561	137612	303	272	104	97	2370	1	1	1	580.792	1159.57	2	1159.57	0.0005	1	49.93	2.1e-05	K	YSFGATCVKK	C				File4189 Spectrum1168 scans: 3300
1	1	EGFR_HUMAN	Epidermal growth factor receptor OS=Homo sapiens GN=EGFR PE=1 SV=2	10561	137612	303	272	104	97	2401	1	1	1	389.516	1165.52	3	1165.52	0.003	1	24.84	0.016	R	ESDCLVCRK	F				File4189 Spectrum237 scans: 2150
1	1	EGFR_HUMAN	Epidermal growth factor receptor OS=Homo sapiens GN=EGFR PE=1 SV=2	10561	137612	303	272	104	97	2402	1	1	1	583.77	1165.53	2	1165.52	0.003	1	38.9	0.00063	R	ESDCLVCRK	F				File4189 Spectrum239 scans: 2153
1	1	EGFR_HUMAN	Epidermal growth factor receptor OS=Homo sapiens GN=EGFR PE=1 SV=2	10561	137612	303	272	104	97	2514	1	1	1	596.782	1191.55	2	1191.55	-0.0001	0	53.74	2.7e-05	K	IICAQQCSGR	C				File4189 Spectrum217 scans: 2121
1	1	EGFR_HUMAN	Epidermal growth factor receptor OS=Homo sapiens GN=EGFR PE=1 SV=2	10561	137612	303	272	104	97	2515	1	1	1	596.782	1191.55	2	1191.55	0.0002	0	58.72	8.8e-06	K	IICAQQCSGR	C				File4189 Spectrum269 scans: 2190
1	1	EGFR_HUMAN	Epidermal growth factor receptor OS=Homo sapiens GN=EGFR PE=1 SV=2	10561	137612	303	272	104	97	2516	1	1	1	596.782	1191.55	2	1191.55	0.0005	0	57.47	1.2e-05	K	IICAQQCSGR	C				File4189 Spectrum523 scans: 2500
1	1	EGFR_HUMAN	Epidermal growth factor receptor OS=Homo sapiens GN=EGFR PE=1 SV=2	10561	137612	303	272	104	97	2517	1	1	1	596.782	1191.55	2	1191.55	0.0007	0	56.58	9.4e-06	K	IICAQQCSGR	C				File4189 Spectrum385 scans: 2332
1	1	EGFR_HUMAN	Epidermal growth factor receptor OS=Homo sapiens GN=EGFR PE=1 SV=2	10561	137612	303	272	104	97	2518	1	1	1	596.782	1191.55	2	1191.55	0.0009	0	43.31	0.00029	K	IICAQQCSGR	C				File4189 Spectrum453 scans: 2417
1	1	EGFR_HUMAN	Epidermal growth factor receptor OS=Homo sapiens GN=EGFR PE=1 SV=2	10561	137612	303	272	104	97	2519	1	1	1	596.782	1191.55	2	1191.55	0.0009	0	58.3	9.2e-06	K	IICAQQCSGR	C				File4189 Spectrum330 scans: 2260
1	1	EGFR_HUMAN	Epidermal growth factor receptor OS=Homo sapiens GN=EGFR PE=1 SV=2	10561	137612	303	272	104	97	2526	1	1	1	398.899	1193.68	3	1193.68	-0.0005	2	50.38	4.4e-05	K	KLFGTSGQKTK	I				File4189 Spectrum139 scans: 2031
1	1	EGFR_HUMAN	Epidermal growth factor receptor OS=Homo sapiens GN=EGFR PE=1 SV=2	10561	137612	303	272	104	97	2545	1	1	1	599.827	1197.64	2	1197.64	-0.0001	0	63.83	1.9e-06	K	VLGSGAFGTVYK	G				File4189 Spectrum3200 scans: 5948
1	1	EGFR_HUMAN	Epidermal growth factor receptor OS=Homo sapiens GN=EGFR PE=1 SV=2	10561	137612	303	272	104	97	2546	1	1	1	599.827	1197.64	2	1197.64	0.0004	0	71.98	6.1e-07	K	VLGSGAFGTVYK	G				File4189 Spectrum3155 scans: 5886
1	1	EGFR_HUMAN	Epidermal growth factor receptor OS=Homo sapiens GN=EGFR PE=1 SV=2	10561	137612	303	272	104	97	2589	1	1	1	402.911	1205.71	3	1205.71	0.0019	2	19.62	0.037	R	RLVHRDLAAR	N				File4189 Spectrum91 scans: 1979
1	1	EGFR_HUMAN	Epidermal growth factor receptor OS=Homo sapiens GN=EGFR PE=1 SV=2	10561	137612	303	272	104	97	2599	1	1	1	605.789	1209.56	2	1209.56	0.0009	0	38.26	0.00074	K	GSTAENAEYLR	V				File4189 Spectrum1263 scans: 3420
1	1	EGFR_HUMAN	Epidermal growth factor receptor OS=Homo sapiens GN=EGFR PE=1 SV=2	10561	137612	303	272	104	97	2600	1	1	1	605.789	1209.56	2	1209.56	0.0018	0	60.04	4.9e-06	K	GSTAENAEYLR	V				File4189 Spectrum1108 scans: 3226
1	1	EGFR_HUMAN	Epidermal growth factor receptor OS=Homo sapiens GN=EGFR PE=1 SV=2	10561	137612	303	272	104	97	2764	1	1	1	417.239	1248.69	3	1248.69	0.0002	0	35.54	0.0023	R	NLQEILHGAVR	F				File4189 Spectrum3458 scans: 6269
1	1	EGFR_HUMAN	Epidermal growth factor receptor OS=Homo sapiens GN=EGFR PE=1 SV=2	10561	137612	303	272	104	97	2765	1	1	1	625.354	1248.69	2	1248.69	0.0003	0	51	6.5e-05	R	NLQEILHGAVR	F				File4189 Spectrum3468 scans: 6281
1	1	EGFR_HUMAN	Epidermal growth factor receptor OS=Homo sapiens GN=EGFR PE=1 SV=2	10561	137612	303	272	104	97	2831	1	1	1	631.883	1261.75	2	1261.75	0.001	1	43.58	0.00012	R	NVLVKTPQHVK	I				File4189 Spectrum425 scans: 2382
1	1	EGFR_HUMAN	Epidermal growth factor receptor OS=Homo sapiens GN=EGFR PE=1 SV=2	10561	137612	303	272	104	97	2897	1	1	1	426.547	1276.62	3	1276.62	-0.0005	1	3.94	0.44	K	IISNRGENSCK	A				File4189 Spectrum4 scans: 1833
1	1	EGFR_HUMAN	Epidermal growth factor receptor OS=Homo sapiens GN=EGFR PE=1 SV=2	10561	137612	303	272	104	97	2898	1	1	1	426.547	1276.62	3	1276.62	-0.0001	1	1.06	0.79	K	IISNRGENSCK	A				File4189 Spectrum7 scans: 1861
1	1	EGFR_HUMAN	Epidermal growth factor receptor OS=Homo sapiens GN=EGFR PE=1 SV=2	10561	137612	303	272	104	97	2899	1	1	1	639.317	1276.62	2	1276.62	0.0005	1	0.59	0.88	K	IISNRGENSCK	A				File4189 Spectrum6 scans: 1844
1	1	EGFR_HUMAN	Epidermal growth factor receptor OS=Homo sapiens GN=EGFR PE=1 SV=2	10561	137612	303	272	104	97	3135	1	1	1	673.844	1345.67	2	1345.67	0.0015	0	56.46	1.9e-05	K	EISDGDVIISGNK	N				File4189 Spectrum2112 scans: 4513
1	1	EGFR_HUMAN	Epidermal growth factor receptor OS=Homo sapiens GN=EGFR PE=1 SV=2	10561	137612	303	272	104	97	3207	1	1	1	689.816	1377.62	2	1377.62	-0.0003	0	10.25	0.43	K	CWMIDADSRPK	F				File4189 Spectrum2473 scans: 4980
1	1	EGFR_HUMAN	Epidermal growth factor receptor OS=Homo sapiens GN=EGFR PE=1 SV=2	10561	137612	303	272	104	97	3246	1	1	1	698.838	1395.66	2	1395.66	0.0001	0	66.67	5.6e-07	K	NLCYANTINWK	K				File4189 Spectrum3520 scans: 6347
1	1	EGFR_HUMAN	Epidermal growth factor receptor OS=Homo sapiens GN=EGFR PE=1 SV=2	10561	137612	303	272	104	97	3272	1	1	1	469.554	1405.64	3	1405.64	-0.0009	0	22.65	0.025	R	NYVVTDHGSCVR	A				File4189 Spectrum1186 scans: 3322
1	1	EGFR_HUMAN	Epidermal growth factor receptor OS=Homo sapiens GN=EGFR PE=1 SV=2	10561	137612	303	272	104	97	3273	1	1	1	703.828	1405.64	2	1405.64	0	0	21.08	0.038	R	NYVVTDHGSCVR	A				File4189 Spectrum953 scans: 3033
1	1	EGFR_HUMAN	Epidermal growth factor receptor OS=Homo sapiens GN=EGFR PE=1 SV=2	10561	137612	303	272	104	97	3274	1	1	1	703.828	1405.64	2	1405.64	0.0001	0	63.08	2.4e-06	R	NYVVTDHGSCVR	A				File4189 Spectrum658 scans: 2671
1	1	EGFR_HUMAN	Epidermal growth factor receptor OS=Homo sapiens GN=EGFR PE=1 SV=2	10561	137612	303	272	104	97	3275	1	1	1	703.828	1405.64	2	1405.64	0.0002	0	50.08	4.8e-05	R	NYVVTDHGSCVR	A				File4189 Spectrum609 scans: 2606
1	1	EGFR_HUMAN	Epidermal growth factor receptor OS=Homo sapiens GN=EGFR PE=1 SV=2	10561	137612	303	272	104	97	3276	1	1	1	469.554	1405.64	3	1405.64	0.0003	0	23.83	0.02	R	NYVVTDHGSCVR	A				File4189 Spectrum753 scans: 2789
1	1	EGFR_HUMAN	Epidermal growth factor receptor OS=Homo sapiens GN=EGFR PE=1 SV=2	10561	137612	303	272	104	97	3277	1	1	1	703.828	1405.64	2	1405.64	0.0003	0	42.71	0.00026	R	NYVVTDHGSCVR	A				File4189 Spectrum716 scans: 2744
1	1	EGFR_HUMAN	Epidermal growth factor receptor OS=Homo sapiens GN=EGFR PE=1 SV=2	10561	137612	303	272	104	97	3278	1	1	1	469.555	1405.64	3	1405.64	0.0012	0	23.51	0.0062	R	NYVVTDHGSCVR	A				File4189 Spectrum637 scans: 2643
1	1	EGFR_HUMAN	Epidermal growth factor receptor OS=Homo sapiens GN=EGFR PE=1 SV=2	10561	137612	303	272	104	97	3279	1	1	1	469.555	1405.64	3	1405.64	0.0016	0	26.51	0.0033	R	NYVVTDHGSCVR	A				File4189 Spectrum690 scans: 2713
1	1	EGFR_HUMAN	Epidermal growth factor receptor OS=Homo sapiens GN=EGFR PE=1 SV=2	10561	137612	303	272	104	97	3280	1	1	1	703.828	1405.64	2	1405.64	0.0017	0	28.93	0.0019	R	NYVVTDHGSCVR	A				File4189 Spectrum1210 scans: 3353
1	1	EGFR_HUMAN	Epidermal growth factor receptor OS=Homo sapiens GN=EGFR PE=1 SV=2	10561	137612	303	272	104	97	3379	1	1	1	480.613	1438.82	3	1438.82	-0.0004	1	62.15	2.7e-06	K	IKVLGSGAFGTVYK	G				File4189 Spectrum3377 scans: 6170
1	1	EGFR_HUMAN	Epidermal growth factor receptor OS=Homo sapiens GN=EGFR PE=1 SV=2	10561	137612	303	272	104	97	3380	1	1	1	720.416	1438.82	2	1438.82	-0.0003	1	78.06	7e-08	K	IKVLGSGAFGTVYK	G				File4189 Spectrum3374 scans: 6166
1	1	EGFR_HUMAN	Epidermal growth factor receptor OS=Homo sapiens GN=EGFR PE=1 SV=2	10561	137612	303	272	104	97	3587	1	1	1	762.886	1523.76	2	1523.76	0.0027	1	41.75	0.00012	K	NLCYANTINWKK	L				File4189 Spectrum2729 scans: 5315
1	1	EGFR_HUMAN	Epidermal growth factor receptor OS=Homo sapiens GN=EGFR PE=1 SV=2	10561	137612	303	272	104	97	3614	1	1	1	767.895	1533.77	2	1533.78	-0.0009	1	64.32	1.6e-06	K	LTKIICAQQCSGR	C				File4189 Spectrum841 scans: 2902
1	1	EGFR_HUMAN	Epidermal growth factor receptor OS=Homo sapiens GN=EGFR PE=1 SV=2	10561	137612	303	272	104	97	3615	1	1	1	512.266	1533.78	3	1533.78	-0.0003	1	43.24	8.8e-05	K	LTKIICAQQCSGR	C				File4189 Spectrum842 scans: 2904
1	1	EGFR_HUMAN	Epidermal growth factor receptor OS=Homo sapiens GN=EGFR PE=1 SV=2	10561	137612	303	272	104	97	3677	1	1	1	777.934	1553.85	2	1553.86	-0.0024	1	60.82	2e-06	K	TPQHVKITDFGLAK	L				File4189 Spectrum2554 scans: 5093
1	1	EGFR_HUMAN	Epidermal growth factor receptor OS=Homo sapiens GN=EGFR PE=1 SV=2	10561	137612	303	272	104	97	3678	1	1	1	518.959	1553.86	3	1553.86	-0.0002	1	62.45	1.4e-06	K	TPQHVKITDFGLAK	L				File4189 Spectrum2537 scans: 5074
1	1	EGFR_HUMAN	Epidermal growth factor receptor OS=Homo sapiens GN=EGFR PE=1 SV=2	10561	137612	303	272	104	97	3704	1	1	1	522.245	1563.71	3	1563.71	0.0001	0	37.47	0.00031	R	MHLPSPTDSNFYR	A				File4189 Spectrum3316 scans: 6089
1	1	EGFR_HUMAN	Epidermal growth factor receptor OS=Homo sapiens GN=EGFR PE=1 SV=2	10561	137612	303	272	104	97	3705	1	1	1	522.245	1563.71	3	1563.71	0.0001	0	40.97	0.00014	R	MHLPSPTDSNFYR	A				File4189 Spectrum3213 scans: 5964
1	1	EGFR_HUMAN	Epidermal growth factor receptor OS=Homo sapiens GN=EGFR PE=1 SV=2	10561	137612	303	272	104	97	3706	1	1	1	782.864	1563.71	2	1563.71	0.0002	0	61.89	1.6e-06	R	MHLPSPTDSNFYR	A				File4189 Spectrum3218 scans: 5970
1	1	EGFR_HUMAN	Epidermal growth factor receptor OS=Homo sapiens GN=EGFR PE=1 SV=2	10561	137612	303	272	104	97	3707	1	1	1	522.245	1563.71	3	1563.71	0.0002	0	24.14	0.0054	R	MHLPSPTDSNFYR	A				File4189 Spectrum3164 scans: 5897
1	1	EGFR_HUMAN	Epidermal growth factor receptor OS=Homo sapiens GN=EGFR PE=1 SV=2	10561	137612	303	272	104	97	3708	1	1	1	782.864	1563.71	2	1563.71	0.0003	0	60.86	2e-06	R	MHLPSPTDSNFYR	A				File4189 Spectrum3275 scans: 6041
1	1	EGFR_HUMAN	Epidermal growth factor receptor OS=Homo sapiens GN=EGFR PE=1 SV=2	10561	137612	303	272	104	97	3709	1	1	1	522.246	1563.71	3	1563.71	0.001	0	43.75	0.00021	R	MHLPSPTDSNFYR	A				File4189 Spectrum3266 scans: 6031
1	1	EGFR_HUMAN	Epidermal growth factor receptor OS=Homo sapiens GN=EGFR PE=1 SV=2	10561	137612	303	272	104	97	3728	1	1	1	524.279	1569.82	3	1569.82	0.0004	0	50.81	9.1e-05	R	TDLHAFENLEIIR	G				File4189 Spectrum4817 scans: 7881
1	1	EGFR_HUMAN	Epidermal growth factor receptor OS=Homo sapiens GN=EGFR PE=1 SV=2	10561	137612	303	272	104	97	3729	1	1	1	785.916	1569.82	2	1569.82	0.0023	0	50.7	2.6e-05	R	TDLHAFENLEIIR	G				File4189 Spectrum4822 scans: 7886
1	1	EGFR_HUMAN	Epidermal growth factor receptor OS=Homo sapiens GN=EGFR PE=1 SV=2	10561	137612	303	272	104	97	3733	1	1	1	525.259	1572.75	3	1572.75	0.0004	2	37.18	0.00061	K	YSFGATCVKKCPR	N				File4189 Spectrum935 scans: 3013
1	1	EGFR_HUMAN	Epidermal growth factor receptor OS=Homo sapiens GN=EGFR PE=1 SV=2	10561	137612	303	272	104	97	3748	1	1	1	790.861	1579.71	2	1579.71	-0.0012	0	26.02	0.011	R	MHLPSPTDSNFYR	A	Oxidation (M)	0.1000000000000.0		File4189 Spectrum2431 scans: 4922
1	1	EGFR_HUMAN	Epidermal growth factor receptor OS=Homo sapiens GN=EGFR PE=1 SV=2	10561	137612	303	272	104	97	3764	1	1	1	794.908	1587.8	2	1587.8	-0.0001	1	32.45	0.00091	R	DPQRYLVIQGDER	M				File4189 Spectrum2398 scans: 4880
1	1	EGFR_HUMAN	Epidermal growth factor receptor OS=Homo sapiens GN=EGFR PE=1 SV=2	10561	137612	303	272	104	97	3996	1	1	1	837.949	1673.88	2	1673.88	0.0002	1	84.17	1.9e-08	R	SLKEISDGDVIISGNK	N				File4189 Spectrum2640 scans: 5195
1	1	EGFR_HUMAN	Epidermal growth factor receptor OS=Homo sapiens GN=EGFR PE=1 SV=2	10561	137612	303	272	104	97	4025	1	1	1	844.83	1687.64	2	1687.65	-0.0008	0	77.7	1.7e-08	R	ACGADSYEMEEDGVR	K				File4189 Spectrum1768 scans: 4052
1	1	EGFR_HUMAN	Epidermal growth factor receptor OS=Homo sapiens GN=EGFR PE=1 SV=2	10561	137612	303	272	104	97	4026	1	1	1	844.83	1687.64	2	1687.65	-0.0006	0	85.24	3e-09	R	ACGADSYEMEEDGVR	K				File4189 Spectrum1653 scans: 3912
1	1	EGFR_HUMAN	Epidermal growth factor receptor OS=Homo sapiens GN=EGFR PE=1 SV=2	10561	137612	303	272	104	97	4027	1	1	1	844.83	1687.65	2	1687.65	-0.0003	0	63.85	4.1e-07	R	ACGADSYEMEEDGVR	K				File4189 Spectrum1822 scans: 4123
1	1	EGFR_HUMAN	Epidermal growth factor receptor OS=Homo sapiens GN=EGFR PE=1 SV=2	10561	137612	303	272	104	97	4028	1	1	1	844.83	1687.65	2	1687.65	-0.0001	0	80.3	9.3e-09	R	ACGADSYEMEEDGVR	K				File4189 Spectrum1521 scans: 3743
1	1	EGFR_HUMAN	Epidermal growth factor receptor OS=Homo sapiens GN=EGFR PE=1 SV=2	10561	137612	303	272	104	97	4029	1	1	1	844.83	1687.65	2	1687.65	-0.0001	0	84.55	3.5e-09	R	ACGADSYEMEEDGVR	K				File4189 Spectrum1713 scans: 3981
1	1	EGFR_HUMAN	Epidermal growth factor receptor OS=Homo sapiens GN=EGFR PE=1 SV=2	10561	137612	303	272	104	97	4030	1	1	1	844.831	1687.65	2	1687.65	0.0013	0	63.29	4.7e-07	R	ACGADSYEMEEDGVR	K				File4189 Spectrum1577 scans: 3814
1	1	EGFR_HUMAN	Epidermal growth factor receptor OS=Homo sapiens GN=EGFR PE=1 SV=2	10561	137612	303	272	104	97	4065	1	1	1	852.828	1703.64	2	1703.64	0.0016	0	81.69	6.8e-09	R	ACGADSYEMEEDGVR	K	Oxidation (M)	0.000000001000000.0		File4189 Spectrum1006 scans: 3095
1	1	EGFR_HUMAN	Epidermal growth factor receptor OS=Homo sapiens GN=EGFR PE=1 SV=2	10561	137612	303	272	104	97	4114	1	1	1	859.895	1717.78	2	1717.78	-0.0004	1	76.99	9.9e-08	R	ECVDKCNLLEGEPR	E				File4189 Spectrum1999 scans: 4362
1	1	EGFR_HUMAN	Epidermal growth factor receptor OS=Homo sapiens GN=EGFR PE=1 SV=2	10561	137612	303	272	104	97	4115	1	1	1	573.6	1717.78	3	1717.78	0.0005	1	30.42	0.0045	R	ECVDKCNLLEGEPR	E				File4189 Spectrum1944 scans: 4291
1	1	EGFR_HUMAN	Epidermal growth factor receptor OS=Homo sapiens GN=EGFR PE=1 SV=2	10561	137612	303	272	104	97	4116	1	1	1	859.896	1717.78	2	1717.78	0.0007	1	60.12	2.3e-06	R	ECVDKCNLLEGEPR	E				File4189 Spectrum1949 scans: 4296
1	1	EGFR_HUMAN	Epidermal growth factor receptor OS=Homo sapiens GN=EGFR PE=1 SV=2	10561	137612	303	272	104	97	4285	1	1	1	888.924	1775.83	2	1775.83	0.0006	0	75.67	8e-08	K	TCPAGVMGENNTLVWK	Y				File4189 Spectrum3825 scans: 6731
1	1	EGFR_HUMAN	Epidermal growth factor receptor OS=Homo sapiens GN=EGFR PE=1 SV=2	10561	137612	303	272	104	97	4409	1	1	1	908.876	1815.74	2	1815.74	-0.0018	1	85.52	2.8e-09	R	ACGADSYEMEEDGVRK	C				File4189 Spectrum1077 scans: 3186
1	1	EGFR_HUMAN	Epidermal growth factor receptor OS=Homo sapiens GN=EGFR PE=1 SV=2	10561	137612	303	272	104	97	4410	1	1	1	908.877	1815.74	2	1815.74	-0.0015	1	1.21	0.76	R	ACGADSYEMEEDGVRK	C				File4189 Spectrum1076 scans: 3184
1	1	EGFR_HUMAN	Epidermal growth factor receptor OS=Homo sapiens GN=EGFR PE=1 SV=2	10561	137612	303	272	104	97	4411	1	1	1	908.877	1815.74	2	1815.74	-0.001	1	93.3	4.7e-10	R	ACGADSYEMEEDGVRK	C				File4189 Spectrum1025 scans: 3117
1	1	EGFR_HUMAN	Epidermal growth factor receptor OS=Homo sapiens GN=EGFR PE=1 SV=2	10561	137612	303	272	104	97	4412	1	1	1	606.254	1815.74	3	1815.74	-0.0006	1	5.86	0.26	R	ACGADSYEMEEDGVRK	C				File4189 Spectrum1594 scans: 3836
1	1	EGFR_HUMAN	Epidermal growth factor receptor OS=Homo sapiens GN=EGFR PE=1 SV=2	10561	137612	303	272	104	97	4413	1	1	1	908.877	1815.74	2	1815.74	-0.0005	1	72	6.3e-08	R	ACGADSYEMEEDGVRK	C				File4189 Spectrum1193 scans: 3331
1	1	EGFR_HUMAN	Epidermal growth factor receptor OS=Homo sapiens GN=EGFR PE=1 SV=2	10561	137612	303	272	104	97	4414	1	1	1	908.877	1815.74	2	1815.74	-0.0005	1	102.81	5.2e-11	R	ACGADSYEMEEDGVRK	C				File4189 Spectrum1132 scans: 3257
1	1	EGFR_HUMAN	Epidermal growth factor receptor OS=Homo sapiens GN=EGFR PE=1 SV=2	10561	137612	303	272	104	97	4415	1	1	1	908.877	1815.74	2	1815.74	-0.0004	1	89.27	1.2e-09	R	ACGADSYEMEEDGVRK	C				File4189 Spectrum956 scans: 3037
1	1	EGFR_HUMAN	Epidermal growth factor receptor OS=Homo sapiens GN=EGFR PE=1 SV=2	10561	137612	303	272	104	97	4417	1	1	1	606.254	1815.74	3	1815.74	-0.0003	1	71.49	7.1e-08	R	ACGADSYEMEEDGVRK	C				File4189 Spectrum948 scans: 3028
1	1	EGFR_HUMAN	Epidermal growth factor receptor OS=Homo sapiens GN=EGFR PE=1 SV=2	10561	137612	303	272	104	97	4418	1	1	1	908.877	1815.74	2	1815.74	0	1	76.33	2.3e-08	R	ACGADSYEMEEDGVRK	C				File4189 Spectrum884 scans: 2952
1	1	EGFR_HUMAN	Epidermal growth factor receptor OS=Homo sapiens GN=EGFR PE=1 SV=2	10561	137612	303	272	104	97	4419	1	1	1	606.254	1815.74	3	1815.74	0.0001	1	18.75	0.013	R	ACGADSYEMEEDGVRK	C				File4189 Spectrum281 scans: 2203
1	1	EGFR_HUMAN	Epidermal growth factor receptor OS=Homo sapiens GN=EGFR PE=1 SV=2	10561	137612	303	272	104	97	4420	1	1	1	606.254	1815.74	3	1815.74	0.0001	1	9.82	0.1	R	ACGADSYEMEEDGVRK	C				File4189 Spectrum1727 scans: 3998
1	1	EGFR_HUMAN	Epidermal growth factor receptor OS=Homo sapiens GN=EGFR PE=1 SV=2	10561	137612	303	272	104	97	4421	1	1	1	606.254	1815.74	3	1815.74	0.0001	1	56.22	2.4e-06	R	ACGADSYEMEEDGVRK	C				File4189 Spectrum880 scans: 2948
1	1	EGFR_HUMAN	Epidermal growth factor receptor OS=Homo sapiens GN=EGFR PE=1 SV=2	10561	137612	303	272	104	97	4422	1	1	1	606.254	1815.74	3	1815.74	0.0003	1	27.21	0.0019	R	ACGADSYEMEEDGVRK	C				File4189 Spectrum1321 scans: 3490
1	1	EGFR_HUMAN	Epidermal growth factor receptor OS=Homo sapiens GN=EGFR PE=1 SV=2	10561	137612	303	272	104	97	4423	1	1	1	606.254	1815.74	3	1815.74	0.001	1	20.59	0.0087	R	ACGADSYEMEEDGVRK	C				File4189 Spectrum1242 scans: 3394
1	1	EGFR_HUMAN	Epidermal growth factor receptor OS=Homo sapiens GN=EGFR PE=1 SV=2	10561	137612	303	272	104	97	4424	1	1	1	606.254	1815.74	3	1815.74	0.001	1	63.62	4.3e-07	R	ACGADSYEMEEDGVRK	C				File4189 Spectrum1073 scans: 3180
1	1	EGFR_HUMAN	Epidermal growth factor receptor OS=Homo sapiens GN=EGFR PE=1 SV=2	10561	137612	303	272	104	97	4425	1	1	1	606.255	1815.74	3	1815.74	0.0014	1	60.18	9.6e-07	R	ACGADSYEMEEDGVRK	C				File4189 Spectrum1016 scans: 3107
1	1	EGFR_HUMAN	Epidermal growth factor receptor OS=Homo sapiens GN=EGFR PE=1 SV=2	10561	137612	303	272	104	97	4426	1	1	1	606.255	1815.74	3	1815.74	0.0014	1	24.3	0.0037	R	ACGADSYEMEEDGVRK	C				File4189 Spectrum1187 scans: 3324
1	1	EGFR_HUMAN	Epidermal growth factor receptor OS=Homo sapiens GN=EGFR PE=1 SV=2	10561	137612	303	272	104	97	4480	1	1	1	611.585	1831.73	3	1831.74	-0.0015	1	15.61	0.027	R	ACGADSYEMEEDGVRK	C	Oxidation (M)	0.0000000010000000.0		File4189 Spectrum924 scans: 2999
1	1	EGFR_HUMAN	Epidermal growth factor receptor OS=Homo sapiens GN=EGFR PE=1 SV=2	10561	137612	303	272	104	97	4481	1	1	1	611.586	1831.74	3	1831.74	-0.0002	1	12.27	0.059	R	ACGADSYEMEEDGVRK	C	Oxidation (M)	0.0000000010000000.0		File4189 Spectrum722 scans: 2751
1	1	EGFR_HUMAN	Epidermal growth factor receptor OS=Homo sapiens GN=EGFR PE=1 SV=2	10561	137612	303	272	104	97	4482	1	1	1	611.586	1831.74	3	1831.74	0	1	55.77	2.6e-06	R	ACGADSYEMEEDGVRK	C	Oxidation (M)	0.0000000010000000.0		File4189 Spectrum569 scans: 2558
1	1	EGFR_HUMAN	Epidermal growth factor receptor OS=Homo sapiens GN=EGFR PE=1 SV=2	10561	137612	303	272	104	97	4483	1	1	1	916.875	1831.74	2	1831.74	0.0012	1	66.05	2.5e-07	R	ACGADSYEMEEDGVRK	C	Oxidation (M)	0.0000000010000000.0		File4189 Spectrum579 scans: 2568
1	1	EGFR_HUMAN	Epidermal growth factor receptor OS=Homo sapiens GN=EGFR PE=1 SV=2	10561	137612	303	272	104	97	4484	1	1	1	611.586	1831.74	3	1831.74	0.0013	1	18.24	0.015	R	ACGADSYEMEEDGVRK	C	Oxidation (M)	0.0000000010000000.0		File4189 Spectrum1028 scans: 3121
1	1	EGFR_HUMAN	Epidermal growth factor receptor OS=Homo sapiens GN=EGFR PE=1 SV=2	10561	137612	303	272	104	97	4485	1	1	1	611.586	1831.74	3	1831.74	0.0015	1	24.54	0.0035	R	ACGADSYEMEEDGVRK	C	Oxidation (M)	0.0000000010000000.0		File4189 Spectrum782 scans: 2826
1	1	EGFR_HUMAN	Epidermal growth factor receptor OS=Homo sapiens GN=EGFR PE=1 SV=2	10561	137612	303	272	104	97	4673	1	1	1	631.316	1890.93	3	1890.93	0.0005	1	40.95	0.00014	R	NGLQSCPIKEDSFLQR	Y				File4189 Spectrum3020 scans: 5701
1	1	EGFR_HUMAN	Epidermal growth factor receptor OS=Homo sapiens GN=EGFR PE=1 SV=2	10561	137612	303	272	104	97	4674	1	1	1	946.471	1890.93	2	1890.93	0.0006	1	33.42	0.00073	R	NGLQSCPIKEDSFLQR	Y				File4189 Spectrum3019 scans: 5699
1	1	EGFR_HUMAN	Epidermal growth factor receptor OS=Homo sapiens GN=EGFR PE=1 SV=2	10561	137612	303	272	104	97	4675	1	1	1	631.316	1890.93	3	1890.93	0.0009	1	47.43	3.6e-05	R	NGLQSCPIKEDSFLQR	Y				File4189 Spectrum3061 scans: 5760
1	1	EGFR_HUMAN	Epidermal growth factor receptor OS=Homo sapiens GN=EGFR PE=1 SV=2	10561	137612	303	272	104	97	4676	1	1	1	946.471	1890.93	2	1890.93	0.0018	1	110.21	4.6e-11	R	NGLQSCPIKEDSFLQR	Y				File4189 Spectrum3062 scans: 5761
1	1	EGFR_HUMAN	Epidermal growth factor receptor OS=Homo sapiens GN=EGFR PE=1 SV=2	10561	137612	303	272	104	97	4704	1	1	1	952.996	1903.98	2	1903.98	-0.0011	0	102.06	2.7e-10	K	LTQLGTFEDHFLSLQR	M				File4189 Spectrum5560 scans: 8716
1	1	EGFR_HUMAN	Epidermal growth factor receptor OS=Homo sapiens GN=EGFR PE=1 SV=2	10561	137612	303	272	104	97	4705	1	1	1	635.667	1903.98	3	1903.98	-0.001	0	62.72	1.3e-06	K	LTQLGTFEDHFLSLQR	M				File4189 Spectrum5559 scans: 8715
1	1	EGFR_HUMAN	Epidermal growth factor receptor OS=Homo sapiens GN=EGFR PE=1 SV=2	10561	137612	303	272	104	97	4767	1	1	1	966.456	1930.9	2	1930.9	-0.0022	2	22.46	0.0078	R	GRECVDKCNLLEGEPR	E				File4189 Spectrum1651 scans: 3910
1	1	EGFR_HUMAN	Epidermal growth factor receptor OS=Homo sapiens GN=EGFR PE=1 SV=2	10561	137612	303	272	104	97	4768	1	1	1	644.64	1930.9	3	1930.9	-0.0001	2	70.63	2.4e-07	R	GRECVDKCNLLEGEPR	E				File4189 Spectrum1560 scans: 3792
1	1	EGFR_HUMAN	Epidermal growth factor receptor OS=Homo sapiens GN=EGFR PE=1 SV=2	10561	137612	303	272	104	97	4769	1	1	1	966.457	1930.9	2	1930.9	0.0002	2	80.89	5.9e-08	R	GRECVDKCNLLEGEPR	E				File4189 Spectrum1596 scans: 3839
1	1	EGFR_HUMAN	Epidermal growth factor receptor OS=Homo sapiens GN=EGFR PE=1 SV=2	10561	137612	303	272	104	97	4770	1	1	1	644.64	1930.9	3	1930.9	0.0004	2	79.17	4.8e-08	R	GRECVDKCNLLEGEPR	E				File4189 Spectrum1605 scans: 3854
1	1	EGFR_HUMAN	Epidermal growth factor receptor OS=Homo sapiens GN=EGFR PE=1 SV=2	10561	137612	303	272	104	97	4771	1	1	1	644.641	1930.9	3	1930.9	0.0009	2	55.1	8.4e-06	R	GRECVDKCNLLEGEPR	E				File4189 Spectrum1660 scans: 3920
1	1	EGFR_HUMAN	Epidermal growth factor receptor OS=Homo sapiens GN=EGFR PE=1 SV=2	10561	137612	303	272	104	97	4776	1	1	1	967.962	1933.91	2	1933.91	-0.0006	0	100.3	6.8e-10	R	FSNNPALCNVESIQWR	D				File4189 Spectrum4436 scans: 7444
1	1	EGFR_HUMAN	Epidermal growth factor receptor OS=Homo sapiens GN=EGFR PE=1 SV=2	10561	137612	303	272	104	97	4777	1	1	1	645.644	1933.91	3	1933.91	0.0006	0	62.07	1.5e-06	R	FSNNPALCNVESIQWR	D				File4189 Spectrum4461 scans: 7472
1	1	EGFR_HUMAN	Epidermal growth factor receptor OS=Homo sapiens GN=EGFR PE=1 SV=2	10561	137612	303	272	104	97	4778	1	1	1	967.963	1933.91	2	1933.91	0.001	0	100.34	3.9e-10	R	FSNNPALCNVESIQWR	D				File4189 Spectrum4500 scans: 7518
1	1	EGFR_HUMAN	Epidermal growth factor receptor OS=Homo sapiens GN=EGFR PE=1 SV=2	10561	137612	303	272	104	97	4779	1	1	1	967.965	1933.91	2	1933.91	0.0045	0	69.69	2.9e-07	R	FSNNPALCNVESIQWR	D				File4189 Spectrum4580 scans: 7606
1	1	EGFR_HUMAN	Epidermal growth factor receptor OS=Homo sapiens GN=EGFR PE=1 SV=2	10561	137612	303	272	104	97	4810	1	1	1	649.667	1945.98	3	1945.98	-0.0008	2	28.7	0.002	K	MARDPQRYLVIQGDER	M				File4189 Spectrum2266 scans: 4709
1	1	EGFR_HUMAN	Epidermal growth factor receptor OS=Homo sapiens GN=EGFR PE=1 SV=2	10561	137612	303	272	104	97	4906	1	1	1	663.706	1988.09	3	1988.09	0.0005	0	49.09	2.5e-05	K	TIQEVAGYVLIALNTVER	I				File4189 Spectrum8811 scans: 12488
1	1	EGFR_HUMAN	Epidermal growth factor receptor OS=Homo sapiens GN=EGFR PE=1 SV=2	10561	137612	303	272	104	97	4907	1	1	1	663.706	1988.1	3	1988.09	0.001	0	32.51	0.00089	K	TIQEVAGYVLIALNTVER	I				File4189 Spectrum8755 scans: 12417
1	1	EGFR_HUMAN	Epidermal growth factor receptor OS=Homo sapiens GN=EGFR PE=1 SV=2	10561	137612	303	272	104	97	4908	1	1	1	995.055	1988.1	2	1988.09	0.0013	0	64.22	9.5e-07	K	TIQEVAGYVLIALNTVER	I				File4189 Spectrum8773 scans: 12440
1	1	EGFR_HUMAN	Epidermal growth factor receptor OS=Homo sapiens GN=EGFR PE=1 SV=2	10561	137612	303	272	104	97	4987	1	1	1	673.356	2017.04	3	2017.05	-0.0003	0	28.95	0.0019	R	LPQPPICTIDVYMIMVK	C				File4189 Spectrum7259 scans: 10652
1	1	EGFR_HUMAN	Epidermal growth factor receptor OS=Homo sapiens GN=EGFR PE=1 SV=2	10561	137612	303	272	104	97	4988	1	1	1	1009.53	2017.05	2	2017.05	0.0006	0	52.81	1.1e-05	R	LPQPPICTIDVYMIMVK	C				File4189 Spectrum7257 scans: 10650
1	1	EGFR_HUMAN	Epidermal growth factor receptor OS=Homo sapiens GN=EGFR PE=1 SV=2	10561	137612	303	272	104	97	4996	1	1	1	1011.51	2021	2	2021	0.0006	0	82.15	2e-08	K	DNIGSQYLLNWCVQIAK	G				File4189 Spectrum6252 scans: 9507
1	1	EGFR_HUMAN	Epidermal growth factor receptor OS=Homo sapiens GN=EGFR PE=1 SV=2	10561	137612	303	272	104	97	5020	1	1	1	678.7	2033.08	3	2033.08	-0.0014	0	62.82	1.3e-06	R	ELVEPLTPSGEAPNQALLR	I				File4189 Spectrum4246 scans: 7222
1	1	EGFR_HUMAN	Epidermal growth factor receptor OS=Homo sapiens GN=EGFR PE=1 SV=2	10561	137612	303	272	104	97	5021	1	1	1	1017.55	2033.08	2	2033.08	0	0	67.58	4.7e-07	R	ELVEPLTPSGEAPNQALLR	I				File4189 Spectrum4241 scans: 7216
1	1	EGFR_HUMAN	Epidermal growth factor receptor OS=Homo sapiens GN=EGFR PE=1 SV=2	10561	137612	303	272	104	97	5022	1	1	1	1017.55	2033.08	2	2033.08	0.0005	0	52.07	1.3e-05	R	ELVEPLTPSGEAPNQALLR	I				File4189 Spectrum4309 scans: 7297
1	1	EGFR_HUMAN	Epidermal growth factor receptor OS=Homo sapiens GN=EGFR PE=1 SV=2	10561	137612	303	272	104	97	5026	1	1	1	678.93	2033.77	3	2033.76	0.0113	0	72.7	5.4e-08	K	SPSDCCHNQCAAGCTGPR	E				File4189 Spectrum84 scans: 1972
1	1	EGFR_HUMAN	Epidermal growth factor receptor OS=Homo sapiens GN=EGFR PE=1 SV=2	10561	137612	303	272	104	97	5195	1	1	1	1052.94	2103.87	2	2103.87	-0.0009	2	76.78	2.1e-08	R	ACGADSYEMEEDGVRKCK	K				File4189 Spectrum868 scans: 2934
1	1	EGFR_HUMAN	Epidermal growth factor receptor OS=Homo sapiens GN=EGFR PE=1 SV=2	10561	137612	303	272	104	97	5196	1	1	1	702.296	2103.87	3	2103.87	0.0001	2	47.65	1.7e-05	R	ACGADSYEMEEDGVRKCK	K				File4189 Spectrum872 scans: 2939
1	1	EGFR_HUMAN	Epidermal growth factor receptor OS=Homo sapiens GN=EGFR PE=1 SV=2	10561	137612	303	272	104	97	5197	1	1	1	526.974	2103.87	4	2103.87	0.0007	2	27.38	0.0018	R	ACGADSYEMEEDGVRKCK	K				File4189 Spectrum931 scans: 3008
1	1	EGFR_HUMAN	Epidermal growth factor receptor OS=Homo sapiens GN=EGFR PE=1 SV=2	10561	137612	303	272	104	97	5198	1	1	1	526.974	2103.87	4	2103.87	0.0009	2	28.69	0.0014	R	ACGADSYEMEEDGVRKCK	K				File4189 Spectrum627 scans: 2630
1	1	EGFR_HUMAN	Epidermal growth factor receptor OS=Homo sapiens GN=EGFR PE=1 SV=2	10561	137612	303	272	104	97	5199	1	1	1	526.974	2103.87	4	2103.87	0.0009	2	37.39	0.00018	R	ACGADSYEMEEDGVRKCK	K				File4189 Spectrum804 scans: 2856
1	1	EGFR_HUMAN	Epidermal growth factor receptor OS=Homo sapiens GN=EGFR PE=1 SV=2	10561	137612	303	272	104	97	5200	1	1	1	1052.94	2103.87	2	2103.87	0.0013	2	93.31	4.7e-10	R	ACGADSYEMEEDGVRKCK	K				File4189 Spectrum807 scans: 2859
1	1	EGFR_HUMAN	Epidermal growth factor receptor OS=Homo sapiens GN=EGFR PE=1 SV=2	10561	137612	303	272	104	97	5201	1	1	1	702.296	2103.87	3	2103.87	0.0014	2	52.69	5.4e-06	R	ACGADSYEMEEDGVRKCK	K				File4189 Spectrum809 scans: 2863
1	1	EGFR_HUMAN	Epidermal growth factor receptor OS=Homo sapiens GN=EGFR PE=1 SV=2	10561	137612	303	272	104	97	5202	1	1	1	526.974	2103.87	4	2103.87	0.0027	2	36.02	0.00025	R	ACGADSYEMEEDGVRKCK	K				File4189 Spectrum866 scans: 2932
1	1	EGFR_HUMAN	Epidermal growth factor receptor OS=Homo sapiens GN=EGFR PE=1 SV=2	10561	137612	303	272	104	97	5210	1	1	1	703.412	2107.22	3	2107.22	0	2	36.49	0.00029	R	NVLVKTPQHVKITDFGLAK	L				File4189 Spectrum3284 scans: 6051
1	1	EGFR_HUMAN	Epidermal growth factor receptor OS=Homo sapiens GN=EGFR PE=1 SV=2	10561	137612	303	272	104	97	5242	1	1	1	1062.03	2122.05	2	2122.06	-0.0045	0	17.65	0.022	R	GDSFTHTPPLDPQELDILK	T				File4189 Spectrum5345 scans: 8478
1	1	EGFR_HUMAN	Epidermal growth factor receptor OS=Homo sapiens GN=EGFR PE=1 SV=2	10561	137612	303	272	104	97	5243	1	1	1	708.359	2122.06	3	2122.06	-0.0018	0	48.8	2.9e-05	R	GDSFTHTPPLDPQELDILK	T				File4189 Spectrum5324 scans: 8456
1	1	EGFR_HUMAN	Epidermal growth factor receptor OS=Homo sapiens GN=EGFR PE=1 SV=2	10561	137612	303	272	104	97	5244	1	1	1	708.36	2122.06	3	2122.06	-0.0003	0	22.37	0.008	R	GDSFTHTPPLDPQELDILK	T				File4189 Spectrum5394 scans: 8534
1	1	EGFR_HUMAN	Epidermal growth factor receptor OS=Homo sapiens GN=EGFR PE=1 SV=2	10561	137612	303	272	104	97	5455	1	1	1	1098.06	2194.1	2	2194.1	-0.0016	1	91.91	2.4e-09	K	EAKPNGIFKGSTAENAEYLR	V				File4189 Spectrum2356 scans: 4825
1	1	EGFR_HUMAN	Epidermal growth factor receptor OS=Homo sapiens GN=EGFR PE=1 SV=2	10561	137612	303	272	104	97	5456	1	1	1	549.533	2194.1	4	2194.1	-0.0003	1	29.16	0.0018	K	EAKPNGIFKGSTAENAEYLR	V				File4189 Spectrum2349 scans: 4816
1	1	EGFR_HUMAN	Epidermal growth factor receptor OS=Homo sapiens GN=EGFR PE=1 SV=2	10561	137612	303	272	104	97	5457	1	1	1	732.375	2194.1	3	2194.1	-0.0001	1	56.55	5e-06	K	EAKPNGIFKGSTAENAEYLR	V				File4189 Spectrum2344 scans: 4810
1	1	EGFR_HUMAN	Epidermal growth factor receptor OS=Homo sapiens GN=EGFR PE=1 SV=2	10561	137612	303	272	104	97	5458	1	1	1	732.375	2194.1	3	2194.1	0.001	1	56.52	5e-06	K	EAKPNGIFKGSTAENAEYLR	V				File4189 Spectrum2395 scans: 4876
1	1	EGFR_HUMAN	Epidermal growth factor receptor OS=Homo sapiens GN=EGFR PE=1 SV=2	10561	137612	303	272	104	97	5487	1	1	1	1104.05	2206.09	2	2206.09	-0.0012	0	108.58	6.6e-11	R	TPLLSSLSATSNNSTVACIDR	N				File4189 Spectrum4243 scans: 7218
1	1	EGFR_HUMAN	Epidermal growth factor receptor OS=Homo sapiens GN=EGFR PE=1 SV=2	10561	137612	303	272	104	97	5488	1	1	1	1104.05	2206.09	2	2206.09	-0.0005	0	37.36	0.00031	R	TPLLSSLSATSNNSTVACIDR	N				File4189 Spectrum4311 scans: 7299
1	1	EGFR_HUMAN	Epidermal growth factor receptor OS=Homo sapiens GN=EGFR PE=1 SV=2	10561	137612	303	272	104	97	5489	1	1	1	1104.05	2206.09	2	2206.09	-0.0003	0	125.75	1.6e-12	R	TPLLSSLSATSNNSTVACIDR	N				File4189 Spectrum4118 scans: 7071
1	1	EGFR_HUMAN	Epidermal growth factor receptor OS=Homo sapiens GN=EGFR PE=1 SV=2	10561	137612	303	272	104	97	5490	1	1	1	736.371	2206.09	3	2206.09	0.0001	0	68.32	3.9e-07	R	TPLLSSLSATSNNSTVACIDR	N				File4189 Spectrum4165 scans: 7126
1	1	EGFR_HUMAN	Epidermal growth factor receptor OS=Homo sapiens GN=EGFR PE=1 SV=2	10561	137612	303	272	104	97	5491	1	1	1	1104.05	2206.09	2	2206.09	0.0002	0	109.42	5.5e-11	R	TPLLSSLSATSNNSTVACIDR	N				File4189 Spectrum4177 scans: 7140
1	1	EGFR_HUMAN	Epidermal growth factor receptor OS=Homo sapiens GN=EGFR PE=1 SV=2	10561	137612	303	272	104	97	5492	1	1	1	1104.05	2206.09	2	2206.09	0.0029	0	66.46	5.9e-07	R	TPLLSSLSATSNNSTVACIDR	N				File4189 Spectrum4559 scans: 7581
1	1	EGFR_HUMAN	Epidermal growth factor receptor OS=Homo sapiens GN=EGFR PE=1 SV=2	10561	137612	303	272	104	97	5497	1	1	1	736.729	2207.16	3	2207.16	0.0011	1	48.73	2.7e-05	K	VLGSGAFGTVYKGLWIPEGEK	V				File4189 Spectrum5733 scans: 8914
1	1	EGFR_HUMAN	Epidermal growth factor receptor OS=Homo sapiens GN=EGFR PE=1 SV=2	10561	137612	303	272	104	97	5525	1	1	1	1109.52	2217.02	2	2217.02	0.0007	0	109.91	6.2e-11	K	EILDEAYVMASVDNPHVCR	L				File4189 Spectrum4614 scans: 7647
1	1	EGFR_HUMAN	Epidermal growth factor receptor OS=Homo sapiens GN=EGFR PE=1 SV=2	10561	137612	303	272	104	97	5526	1	1	1	740.015	2217.02	3	2217.02	0.0031	0	63.94	1e-06	K	EILDEAYVMASVDNPHVCR	L				File4189 Spectrum4593 scans: 7623
1	1	EGFR_HUMAN	Epidermal growth factor receptor OS=Homo sapiens GN=EGFR PE=1 SV=2	10561	137612	303	272	104	97	5527	1	1	1	555.725	2218.87	4	2218.87	0	1	28.31	0.0015	R	GKSPSDCCHNQCAAGCTGPR	E				File4189 Spectrum18 scans: 1893
1	1	EGFR_HUMAN	Epidermal growth factor receptor OS=Homo sapiens GN=EGFR PE=1 SV=2	10561	137612	303	272	104	97	5528	1	1	1	740.631	2218.87	3	2218.87	0.0003	1	44.85	3.3e-05	R	GKSPSDCCHNQCAAGCTGPR	E				File4189 Spectrum19 scans: 1894
1	1	EGFR_HUMAN	Epidermal growth factor receptor OS=Homo sapiens GN=EGFR PE=1 SV=2	10561	137612	303	272	104	97	5569	1	1	1	746.015	2235.02	3	2235.02	-0.0011	0	70.51	3.6e-07	K	GSHQISLDNPDYQQDFFPK	E				File4189 Spectrum3996 scans: 6932
1	1	EGFR_HUMAN	Epidermal growth factor receptor OS=Homo sapiens GN=EGFR PE=1 SV=2	10561	137612	303	272	104	97	5570	1	1	1	1118.52	2235.02	2	2235.02	0.0005	0	106.86	8.6e-11	K	GSHQISLDNPDYQQDFFPK	E				File4189 Spectrum4087 scans: 7036
1	1	EGFR_HUMAN	Epidermal growth factor receptor OS=Homo sapiens GN=EGFR PE=1 SV=2	10561	137612	303	272	104	97	5571	1	1	1	1118.52	2235.02	2	2235.02	0.0005	0	104.22	1.6e-10	K	GSHQISLDNPDYQQDFFPK	E				File4189 Spectrum4030 scans: 6971
1	1	EGFR_HUMAN	Epidermal growth factor receptor OS=Homo sapiens GN=EGFR PE=1 SV=2	10561	137612	303	272	104	97	5572	1	1	1	746.017	2235.03	3	2235.02	0.0055	0	64.22	1.7e-06	K	GSHQISLDNPDYQQDFFPK	E				File4189 Spectrum4066 scans: 7012
1	1	EGFR_HUMAN	Epidermal growth factor receptor OS=Homo sapiens GN=EGFR PE=1 SV=2	10561	137612	303	272	104	97	5587	1	1	1	1120.98	2239.95	2	2239.96	-0.0022	0	63.5	6.7e-07	R	GPDNCIQCAHYIDGPHCVK	T				File4189 Spectrum1823 scans: 4124
1	1	EGFR_HUMAN	Epidermal growth factor receptor OS=Homo sapiens GN=EGFR PE=1 SV=2	10561	137612	303	272	104	97	5588	1	1	1	560.996	2239.96	4	2239.96	-0.0001	0	37.4	0.00027	R	GPDNCIQCAHYIDGPHCVK	T				File4189 Spectrum1815 scans: 4114
1	1	EGFR_HUMAN	Epidermal growth factor receptor OS=Homo sapiens GN=EGFR PE=1 SV=2	10561	137612	303	272	104	97	5589	1	1	1	747.659	2239.96	3	2239.96	0.0001	0	63.28	7.3e-07	R	GPDNCIQCAHYIDGPHCVK	T				File4189 Spectrum1816 scans: 4115
1	1	EGFR_HUMAN	Epidermal growth factor receptor OS=Homo sapiens GN=EGFR PE=1 SV=2	10561	137612	303	272	104	97	5801	1	1	1	1149.05	2296.1	2	2296.1	-0.0018	1	40.65	0.00015	K	GSTAENAEYLRVAPQSSEFIGA	-				File4189 Spectrum4209 scans: 7176
1	1	EGFR_HUMAN	Epidermal growth factor receptor OS=Homo sapiens GN=EGFR PE=1 SV=2	10561	137612	303	272	104	97	5840	1	1	1	1156.93	2311.84	2	2311.84	0.0004	0	79.41	1.1e-08	K	CDPSCPNGSCWGAGEENCQK	L				File4189 Spectrum1388 scans: 3577
1	1	EGFR_HUMAN	Epidermal growth factor receptor OS=Homo sapiens GN=EGFR PE=1 SV=2	10561	137612	303	272	104	97	5841	1	1	1	1156.93	2311.84	2	2311.84	0.0027	0	96.87	2.1e-10	K	CDPSCPNGSCWGAGEENCQK	L				File4189 Spectrum1339 scans: 3511
1	1	EGFR_HUMAN	Epidermal growth factor receptor OS=Homo sapiens GN=EGFR PE=1 SV=2	10561	137612	303	272	104	97	5919	1	1	1	781.734	2342.18	3	2342.18	-0.0026	2	31.16	0.0012	K	NLCYANTINWKKLFGTSGQK	T				File4189 Spectrum4945 scans: 8028
1	1	EGFR_HUMAN	Epidermal growth factor receptor OS=Homo sapiens GN=EGFR PE=1 SV=2	10561	137612	303	272	104	97	5964	1	1	1	787.41	2359.21	3	2359.21	-0.001	1	53.34	1e-05	K	GERLPQPPICTIDVYMIMVK	C				File4189 Spectrum6716 scans: 10037
1	1	EGFR_HUMAN	Epidermal growth factor receptor OS=Homo sapiens GN=EGFR PE=1 SV=2	10561	137612	303	272	104	97	5987	1	1	1	790.339	2368	3	2368.01	-0.019	0	106.25	2.4e-11	K	ATGQVCHALCSPEGCWGPEPR	D				File4189 Spectrum2740 scans: 5332
1	1	EGFR_HUMAN	Epidermal growth factor receptor OS=Homo sapiens GN=EGFR PE=1 SV=2	10561	137612	303	272	104	97	5988	1	1	1	1185.01	2368	2	2368.01	-0.018	0	82.71	5.4e-09	K	ATGQVCHALCSPEGCWGPEPR	D				File4189 Spectrum2749 scans: 5345
1	1	EGFR_HUMAN	Epidermal growth factor receptor OS=Homo sapiens GN=EGFR PE=1 SV=2	10561	137612	303	272	104	97	5989	1	1	1	1185.01	2368.01	2	2368.01	-0.0019	0	77.13	2.7e-08	K	ATGQVCHALCSPEGCWGPEPR	D				File4189 Spectrum2998 scans: 5669
1	1	EGFR_HUMAN	Epidermal growth factor receptor OS=Homo sapiens GN=EGFR PE=1 SV=2	10561	137612	303	272	104	97	5990	1	1	1	790.345	2368.01	3	2368.01	-0.0018	0	53.73	5.9e-06	K	ATGQVCHALCSPEGCWGPEPR	D				File4189 Spectrum3385 scans: 6180
1	1	EGFR_HUMAN	Epidermal growth factor receptor OS=Homo sapiens GN=EGFR PE=1 SV=2	10561	137612	303	272	104	97	5991	1	1	1	1185.01	2368.01	2	2368.01	-0.0007	0	82.71	7.5e-09	K	ATGQVCHALCSPEGCWGPEPR	D				File4189 Spectrum2815 scans: 5424
1	1	EGFR_HUMAN	Epidermal growth factor receptor OS=Homo sapiens GN=EGFR PE=1 SV=2	10561	137612	303	272	104	97	5992	1	1	1	790.345	2368.01	3	2368.01	-0.0004	0	56.43	3.2e-06	K	ATGQVCHALCSPEGCWGPEPR	D				File4189 Spectrum3085 scans: 5793
1	1	EGFR_HUMAN	Epidermal growth factor receptor OS=Homo sapiens GN=EGFR PE=1 SV=2	10561	137612	303	272	104	97	5993	1	1	1	790.346	2368.01	3	2368.01	-0.0002	0	92.44	8e-10	K	ATGQVCHALCSPEGCWGPEPR	D				File4189 Spectrum3007 scans: 5681
1	1	EGFR_HUMAN	Epidermal growth factor receptor OS=Homo sapiens GN=EGFR PE=1 SV=2	10561	137612	303	272	104	97	5994	1	1	1	790.346	2368.01	3	2368.01	0	0	42.82	7.3e-05	K	ATGQVCHALCSPEGCWGPEPR	D				File4189 Spectrum3333 scans: 6110
1	1	EGFR_HUMAN	Epidermal growth factor receptor OS=Homo sapiens GN=EGFR PE=1 SV=2	10561	137612	303	272	104	97	5995	1	1	1	1185.01	2368.01	2	2368.01	0	0	92.21	8.4e-10	K	ATGQVCHALCSPEGCWGPEPR	D				File4189 Spectrum2876 scans: 5505
1	1	EGFR_HUMAN	Epidermal growth factor receptor OS=Homo sapiens GN=EGFR PE=1 SV=2	10561	137612	303	272	104	97	5996	1	1	1	1185.01	2368.01	2	2368.01	0.0003	0	79.58	1.5e-08	K	ATGQVCHALCSPEGCWGPEPR	D				File4189 Spectrum2936 scans: 5582
1	1	EGFR_HUMAN	Epidermal growth factor receptor OS=Homo sapiens GN=EGFR PE=1 SV=2	10561	137612	303	272	104	97	5997	1	1	1	790.346	2368.02	3	2368.01	0.0009	0	72.83	7.6e-08	K	ATGQVCHALCSPEGCWGPEPR	D				File4189 Spectrum2954 scans: 5608
1	1	EGFR_HUMAN	Epidermal growth factor receptor OS=Homo sapiens GN=EGFR PE=1 SV=2	10561	137612	303	272	104	97	5998	1	1	1	790.346	2368.02	3	2368.01	0.0009	0	93.56	6.4e-10	K	ATGQVCHALCSPEGCWGPEPR	D				File4189 Spectrum2850 scans: 5472
1	1	EGFR_HUMAN	Epidermal growth factor receptor OS=Homo sapiens GN=EGFR PE=1 SV=2	10561	137612	303	272	104	97	5999	1	1	1	790.346	2368.02	3	2368.01	0.0013	0	89.05	1.8e-09	K	ATGQVCHALCSPEGCWGPEPR	D				File4189 Spectrum2906 scans: 5543
1	1	EGFR_HUMAN	Epidermal growth factor receptor OS=Homo sapiens GN=EGFR PE=1 SV=2	10561	137612	303	272	104	97	6000	1	1	1	790.346	2368.02	3	2368.01	0.0028	0	58.51	2e-06	K	ATGQVCHALCSPEGCWGPEPR	D				File4189 Spectrum3044 scans: 5736
1	1	EGFR_HUMAN	Epidermal growth factor receptor OS=Homo sapiens GN=EGFR PE=1 SV=2	10561	137612	303	272	104	97	6001	1	1	1	790.346	2368.02	3	2368.01	0.0029	0	45.44	4.1e-05	K	ATGQVCHALCSPEGCWGPEPR	D				File4189 Spectrum3287 scans: 6054
1	1	EGFR_HUMAN	Epidermal growth factor receptor OS=Homo sapiens GN=EGFR PE=1 SV=2	10561	137612	303	272	104	97	6002	1	1	1	790.347	2368.02	3	2368.01	0.0033	0	110.88	1.2e-11	K	ATGQVCHALCSPEGCWGPEPR	D				File4189 Spectrum2799 scans: 5405
1	1	EGFR_HUMAN	Epidermal growth factor receptor OS=Homo sapiens GN=EGFR PE=1 SV=2	10561	137612	303	272	104	97	6003	1	1	1	1185.02	2368.02	2	2368.01	0.0056	0	58.96	1.9e-06	K	ATGQVCHALCSPEGCWGPEPR	D				File4189 Spectrum3041 scans: 5731
1	1	EGFR_HUMAN	Epidermal growth factor receptor OS=Homo sapiens GN=EGFR PE=1 SV=2	10561	137612	303	272	104	97	6129	1	1	1	604.807	2415.2	4	2415.2	-0.0003	1	47.34	3.6e-05	R	EHKDNIGSQYLLNWCVQIAK	G				File4189 Spectrum4934 scans: 8014
1	1	EGFR_HUMAN	Epidermal growth factor receptor OS=Homo sapiens GN=EGFR PE=1 SV=2	10561	137612	303	272	104	97	6130	1	1	1	806.074	2415.2	3	2415.2	0.0009	1	84.64	1.2e-08	R	EHKDNIGSQYLLNWCVQIAK	G				File4189 Spectrum4935 scans: 8015
1	1	EGFR_HUMAN	Epidermal growth factor receptor OS=Homo sapiens GN=EGFR PE=1 SV=2	10561	137612	303	272	104	97	6131	1	1	1	806.077	2415.21	3	2415.2	0.0093	1	12.22	0.071	R	EHKDNIGSQYLLNWCVQIAK	G				File4189 Spectrum5058 scans: 8156
1	1	EGFR_HUMAN	Epidermal growth factor receptor OS=Homo sapiens GN=EGFR PE=1 SV=2	10561	137612	303	272	104	97	6193	1	1	1	812.449	2434.33	3	2434.33	0.0007	2	34.29	0.0017	K	VLGSGAFGTVYKGLWIPEGEKVK	I				File4189 Spectrum5256 scans: 8379
1	1	EGFR_HUMAN	Epidermal growth factor receptor OS=Homo sapiens GN=EGFR PE=1 SV=2	10561	137612	303	272	104	97	6194	1	1	1	609.589	2434.33	4	2434.33	0.002	2	13.13	0.23	K	VLGSGAFGTVYKGLWIPEGEKVK	I				File4189 Spectrum5246 scans: 8368
1	1	EGFR_HUMAN	Epidermal growth factor receptor OS=Homo sapiens GN=EGFR PE=1 SV=2	10561	137612	303	272	104	97	6220	1	1	1	817.763	2450.27	3	2450.27	-0.0009	1	54.52	7.7e-06	R	GDSFTHTPPLDPQELDILKTVK	E				File4189 Spectrum5234 scans: 8355
1	1	EGFR_HUMAN	Epidermal growth factor receptor OS=Homo sapiens GN=EGFR PE=1 SV=2	10561	137612	303	272	104	97	6221	1	1	1	613.574	2450.27	4	2450.27	-0.0003	1	35.88	0.00043	R	GDSFTHTPPLDPQELDILKTVK	E				File4189 Spectrum5212 scans: 8330
1	1	EGFR_HUMAN	Epidermal growth factor receptor OS=Homo sapiens GN=EGFR PE=1 SV=2	10561	137612	303	272	104	97	6425	1	1	1	633.556	2530.2	4	2530.19	0.0006	1	61.42	1.7e-06	K	ANKEILDEAYVMASVDNPHVCR	L				File4189 Spectrum4152 scans: 7112
1	1	EGFR_HUMAN	Epidermal growth factor receptor OS=Homo sapiens GN=EGFR PE=1 SV=2	10561	137612	303	272	104	97	6426	1	1	1	844.406	2530.2	3	2530.19	0.0009	1	1.74	0.69	K	ANKEILDEAYVMASVDNPHVCR	L				File4189 Spectrum4156 scans: 7116
1	1	EGFR_HUMAN	Epidermal growth factor receptor OS=Homo sapiens GN=EGFR PE=1 SV=2	10561	137612	303	272	104	97	6427	1	1	1	844.406	2530.2	3	2530.19	0.0009	1	95.14	1.2e-09	K	ANKEILDEAYVMASVDNPHVCR	L				File4189 Spectrum4153 scans: 7113
1	1	EGFR_HUMAN	Epidermal growth factor receptor OS=Homo sapiens GN=EGFR PE=1 SV=2	10561	137612	303	272	104	97	6443	1	1	1	634.758	2535	4	2535	-0.0006	2	40.23	9.5e-05	R	CRGKSPSDCCHNQCAAGCTGPR	E				File4189 Spectrum10 scans: 1868
1	1	EGFR_HUMAN	Epidermal growth factor receptor OS=Homo sapiens GN=EGFR PE=1 SV=2	10561	137612	303	272	104	97	6444	1	1	1	508.008	2535	5	2535	-0.0006	2	25.96	0.0025	R	CRGKSPSDCCHNQCAAGCTGPR	E				File4189 Spectrum11 scans: 1871
1	1	EGFR_HUMAN	Epidermal growth factor receptor OS=Homo sapiens GN=EGFR PE=1 SV=2	10561	137612	303	272	104	97	6445	1	1	1	846.009	2535.01	3	2535	0.001	2	21.04	0.0079	R	CRGKSPSDCCHNQCAAGCTGPR	E				File4189 Spectrum12 scans: 1873
1	1	EGFR_HUMAN	Epidermal growth factor receptor OS=Homo sapiens GN=EGFR PE=1 SV=2	10561	137612	303	272	104	97	6678	1	1	1	880.095	2637.26	3	2637.26	-0.0015	1	53.31	1e-05	R	YLVIQGDERMHLPSPTDSNFYR	A				File4189 Spectrum4326 scans: 7316
1	1	EGFR_HUMAN	Epidermal growth factor receptor OS=Homo sapiens GN=EGFR PE=1 SV=2	10561	137612	303	272	104	97	6679	1	1	1	660.323	2637.26	4	2637.26	-0.0007	1	26.02	0.0036	R	YLVIQGDERMHLPSPTDSNFYR	A				File4189 Spectrum4307 scans: 7295
1	1	EGFR_HUMAN	Epidermal growth factor receptor OS=Homo sapiens GN=EGFR PE=1 SV=2	10561	137612	303	272	104	97	6680	1	1	1	660.323	2637.26	4	2637.26	-0.0002	1	31.57	0.0011	R	YLVIQGDERMHLPSPTDSNFYR	A				File4189 Spectrum4370 scans: 7369
1	1	EGFR_HUMAN	Epidermal growth factor receptor OS=Homo sapiens GN=EGFR PE=1 SV=2	10561	137612	303	272	104	97	6681	1	1	1	880.096	2637.27	3	2637.26	0.0018	1	39.83	0.00018	R	YLVIQGDERMHLPSPTDSNFYR	A				File4189 Spectrum4386 scans: 7388
1	1	EGFR_HUMAN	Epidermal growth factor receptor OS=Homo sapiens GN=EGFR PE=1 SV=2	10561	137612	303	272	104	97	6725	1	1	1	885.427	2653.26	3	2653.26	0.0008	1	23.01	0.0069	R	YLVIQGDERMHLPSPTDSNFYR	A	Oxidation (M)	0.0000000001000000000000.0		File4189 Spectrum3642 scans: 6496
1	1	EGFR_HUMAN	Epidermal growth factor receptor OS=Homo sapiens GN=EGFR PE=1 SV=2	10561	137612	303	272	104	97	6728	1	1	1	885.695	2654.06	3	2654.06	0.0003	1	48.66	1.4e-05	K	CDPSCPNGSCWGAGEENCQKLTK	I				File4189 Spectrum1721 scans: 3990
1	1	EGFR_HUMAN	Epidermal growth factor receptor OS=Homo sapiens GN=EGFR PE=1 SV=2	10561	137612	303	272	104	97	6729	1	1	1	1328.04	2654.06	2	2654.06	0.0006	1	67.04	2e-07	K	CDPSCPNGSCWGAGEENCQKLTK	I				File4189 Spectrum1746 scans: 4023
1	1	EGFR_HUMAN	Epidermal growth factor receptor OS=Homo sapiens GN=EGFR PE=1 SV=2	10561	137612	303	272	104	97	6730	1	1	1	885.695	2654.06	3	2654.06	0.0007	1	66.89	2e-07	K	CDPSCPNGSCWGAGEENCQKLTK	I				File4189 Spectrum1776 scans: 4062
1	1	EGFR_HUMAN	Epidermal growth factor receptor OS=Homo sapiens GN=EGFR PE=1 SV=2	10561	137612	303	272	104	97	6772	1	1	1	891.824	2672.45	3	2672.45	0	1	15.83	0.11	R	LLQERELVEPLTPSGEAPNQALLR	I				File4189 Spectrum4797 scans: 7857
1	1	EGFR_HUMAN	Epidermal growth factor receptor OS=Homo sapiens GN=EGFR PE=1 SV=2	10561	137612	303	272	104	97	6773	1	1	1	669.12	2672.45	4	2672.45	0.0007	1	50.29	3.9e-05	R	LLQERELVEPLTPSGEAPNQALLR	I				File4189 Spectrum4505 scans: 7523
1	1	EGFR_HUMAN	Epidermal growth factor receptor OS=Homo sapiens GN=EGFR PE=1 SV=2	10561	137612	303	272	104	97	6774	1	1	1	891.824	2672.45	3	2672.45	0.001	1	20.84	0.034	R	LLQERELVEPLTPSGEAPNQALLR	I				File4189 Spectrum4694 scans: 7741
1	1	EGFR_HUMAN	Epidermal growth factor receptor OS=Homo sapiens GN=EGFR PE=1 SV=2	10561	137612	303	272	104	97	6775	1	1	1	1337.23	2672.45	2	2672.45	0.0026	1	72.32	2.4e-07	R	LLQERELVEPLTPSGEAPNQALLR	I				File4189 Spectrum4503 scans: 7521
1	1	EGFR_HUMAN	Epidermal growth factor receptor OS=Homo sapiens GN=EGFR PE=1 SV=2	10561	137612	303	272	104	97	6776	1	1	1	891.825	2672.45	3	2672.45	0.0026	1	42.32	0.00024	R	LLQERELVEPLTPSGEAPNQALLR	I				File4189 Spectrum4622 scans: 7658
1	1	EGFR_HUMAN	Epidermal growth factor receptor OS=Homo sapiens GN=EGFR PE=1 SV=2	10561	137612	303	272	104	97	6777	1	1	1	891.825	2672.45	3	2672.45	0.0028	1	7.56	0.72	R	LLQERELVEPLTPSGEAPNQALLR	I				File4189 Spectrum4928 scans: 8007
1	1	EGFR_HUMAN	Epidermal growth factor receptor OS=Homo sapiens GN=EGFR PE=1 SV=2	10561	137612	303	272	104	97	6778	1	1	1	891.826	2672.46	3	2672.45	0.0065	1	80.12	3.7e-08	R	LLQERELVEPLTPSGEAPNQALLR	I				File4189 Spectrum4560 scans: 7583
1	1	EGFR_HUMAN	Epidermal growth factor receptor OS=Homo sapiens GN=EGFR PE=1 SV=2	10561	137612	303	272	104	97	6806	1	1	1	1342.61	2683.2	2	2683.2	-0.0009	0	30.8	0.0024	K	DTCPPLMLYNPTTYQMDVNPEGK	Y				File4189 Spectrum5745 scans: 8927
1	1	EGFR_HUMAN	Epidermal growth factor receptor OS=Homo sapiens GN=EGFR PE=1 SV=2	10561	137612	303	272	104	97	6875	1	1	1	908.782	2723.32	3	2723.32	0.0017	1	70.84	2.3e-07	K	EISDGDVIISGNKNLCYANTINWK	K				File4189 Spectrum4435 scans: 7443
1	1	EGFR_HUMAN	Epidermal growth factor receptor OS=Homo sapiens GN=EGFR PE=1 SV=2	10561	137612	303	272	104	97	6931	1	1	1	920.74	2759.2	3	2759.2	-0.0008	0	8.96	0.2	R	DIVSSDFLSNMSMDFQNHLGSCQK	C				File4189 Spectrum6510 scans: 9805
1	1	EGFR_HUMAN	Epidermal growth factor receptor OS=Homo sapiens GN=EGFR PE=1 SV=2	10561	137612	303	272	104	97	6971	1	1	1	927.132	2778.37	3	2778.38	-0.0021	1	59.43	2.7e-06	K	VCQGTSNKLTQLGTFEDHFLSLQR	M				File4189 Spectrum5399 scans: 8539
1	1	EGFR_HUMAN	Epidermal growth factor receptor OS=Homo sapiens GN=EGFR PE=1 SV=2	10561	137612	303	272	104	97	6972	1	1	1	695.601	2778.38	4	2778.38	-0.0008	1	35.75	0.00044	K	VCQGTSNKLTQLGTFEDHFLSLQR	M				File4189 Spectrum5416 scans: 8558
1	1	EGFR_HUMAN	Epidermal growth factor receptor OS=Homo sapiens GN=EGFR PE=1 SV=2	10561	137612	303	272	104	97	7105	1	1	1	943.858	2828.55	3	2828.55	0.0011	2	67.98	3.8e-07	R	RLLQERELVEPLTPSGEAPNQALLR	I				File4189 Spectrum4106 scans: 7058
1	1	EGFR_HUMAN	Epidermal growth factor receptor OS=Homo sapiens GN=EGFR PE=1 SV=2	10561	137612	303	272	104	97	7106	1	1	1	708.146	2828.55	4	2828.55	0.0041	2	57.41	4.1e-06	R	RLLQERELVEPLTPSGEAPNQALLR	I				File4189 Spectrum4083 scans: 7031
1	1	EGFR_HUMAN	Epidermal growth factor receptor OS=Homo sapiens GN=EGFR PE=1 SV=2	10561	137612	303	272	104	97	7146	1	1	1	951.48	2851.42	3	2851.42	-0.0002	2	51.16	1.6e-05	K	EISDGDVIISGNKNLCYANTINWKK	L				File4189 Spectrum3870 scans: 6787
1	1	EGFR_HUMAN	Epidermal growth factor receptor OS=Homo sapiens GN=EGFR PE=1 SV=2	10561	137612	303	272	104	97	7147	1	1	1	713.862	2851.42	4	2851.42	0	2	26.16	0.0035	K	EISDGDVIISGNKNLCYANTINWKK	L				File4189 Spectrum3869 scans: 6786
1	1	EGFR_HUMAN	Epidermal growth factor receptor OS=Homo sapiens GN=EGFR PE=1 SV=2	10561	137612	303	272	104	97	7270	1	1	1	727.625	2906.47	4	2906.47	0.0005	2	62.27	1.4e-06	K	KVCQGTSNKLTQLGTFEDHFLSLQR	M				File4189 Spectrum4816 scans: 7880
1	1	EGFR_HUMAN	Epidermal growth factor receptor OS=Homo sapiens GN=EGFR PE=1 SV=2	10561	137612	303	272	104	97	7517	1	1	1	1015.43	3043.28	3	3043.28	-0.0011	1	75.84	2.6e-08	R	GENSCKATGQVCHALCSPEGCWGPEPR	D				File4189 Spectrum2627 scans: 5180
1	1	EGFR_HUMAN	Epidermal growth factor receptor OS=Homo sapiens GN=EGFR PE=1 SV=2	10561	137612	303	272	104	97	7518	1	1	1	761.827	3043.28	4	3043.28	0.0014	1	69.65	1.1e-07	R	GENSCKATGQVCHALCSPEGCWGPEPR	D				File4189 Spectrum2621 scans: 5172
1	1	EGFR_HUMAN	Epidermal growth factor receptor OS=Homo sapiens GN=EGFR PE=1 SV=2	10561	137612	303	272	104	97	7535	1	1	1	1018.18	3051.53	3	3051.53	-0.0009	2	65.49	7.2e-07	R	SLKEISDGDVIISGNKNLCYANTINWK	K				File4189 Spectrum4618 scans: 7653
1	1	EGFR_HUMAN	Epidermal growth factor receptor OS=Homo sapiens GN=EGFR PE=1 SV=2	10561	137612	303	272	104	97	7536	1	1	1	1018.19	3051.53	3	3051.53	-0.0001	2	86.12	8.4e-09	R	SLKEISDGDVIISGNKNLCYANTINWK	K				File4189 Spectrum4478 scans: 7492
1	1	EGFR_HUMAN	Epidermal growth factor receptor OS=Homo sapiens GN=EGFR PE=1 SV=2	10561	137612	303	272	104	97	7537	1	1	1	763.891	3051.53	4	3051.53	0.0004	2	70.01	2.7e-07	R	SLKEISDGDVIISGNKNLCYANTINWK	K				File4189 Spectrum4475 scans: 7489
1	1	EGFR_HUMAN	Epidermal growth factor receptor OS=Homo sapiens GN=EGFR PE=1 SV=2	10561	137612	303	272	104	97	7538	1	1	1	763.891	3051.53	4	3051.53	0.0006	2	71.1	2.2e-07	R	SLKEISDGDVIISGNKNLCYANTINWK	K				File4189 Spectrum4397 scans: 7400
1	1	EGFR_HUMAN	Epidermal growth factor receptor OS=Homo sapiens GN=EGFR PE=1 SV=2	10561	137612	303	272	104	97	7539	1	1	1	1018.19	3051.53	3	3051.53	0.0013	2	91.07	2.9e-09	R	SLKEISDGDVIISGNKNLCYANTINWK	K				File4189 Spectrum4398 scans: 7401
1	1	EGFR_HUMAN	Epidermal growth factor receptor OS=Homo sapiens GN=EGFR PE=1 SV=2	10561	137612	303	272	104	97	7540	1	1	1	763.891	3051.54	4	3051.53	0.0016	2	58.93	3e-06	R	SLKEISDGDVIISGNKNLCYANTINWK	K				File4189 Spectrum4550 scans: 7572
1	1	EGFR_HUMAN	Epidermal growth factor receptor OS=Homo sapiens GN=EGFR PE=1 SV=2	10561	137612	303	272	104	97	7559	1	1	1	1018.73	3053.17	3	3053.17	0.0002	1	53.68	4.3e-06	K	SPSDCCHNQCAAGCTGPRESDCLVCR	K				File4189 Spectrum1015 scans: 3106
1	1	EGFR_HUMAN	Epidermal growth factor receptor OS=Homo sapiens GN=EGFR PE=1 SV=2	10561	137612	303	272	104	97	7560	1	1	1	764.301	3053.17	4	3053.17	0.0008	1	18.91	0.013	K	SPSDCCHNQCAAGCTGPRESDCLVCR	K				File4189 Spectrum1001 scans: 3090
1	1	EGFR_HUMAN	Epidermal growth factor receptor OS=Homo sapiens GN=EGFR PE=1 SV=2	10561	137612	303	272	104	97	7598	1	1	1	769.825	3075.27	4	3075.28	-0.0045	1	5.06	0.31	R	NYVVTDHGSCVRACGADSYEMEEDGVR	K				File4189 Spectrum2263 scans: 4705
1	1	EGFR_HUMAN	Epidermal growth factor receptor OS=Homo sapiens GN=EGFR PE=1 SV=2	10561	137612	303	272	104	97	7599	1	1	1	1026.1	3075.28	3	3075.28	-0.0002	1	10.59	0.087	R	NYVVTDHGSCVRACGADSYEMEEDGVR	K				File4189 Spectrum2275 scans: 4720
1	1	EGFR_HUMAN	Epidermal growth factor receptor OS=Homo sapiens GN=EGFR PE=1 SV=2	10561	137612	303	272	104	97	7715	1	1	1	786.883	3143.5	4	3143.5	0.0006	2	89.43	4.1e-09	R	EATSPKANKEILDEAYVMASVDNPHVCR	L				File4189 Spectrum4055 scans: 6999
1	1	EGFR_HUMAN	Epidermal growth factor receptor OS=Homo sapiens GN=EGFR PE=1 SV=2	10561	137612	303	272	104	97	7716	1	1	1	629.708	3143.5	5	3143.5	0.0015	2	59.73	2.5e-06	R	EATSPKANKEILDEAYVMASVDNPHVCR	L				File4189 Spectrum4032 scans: 6973
1	1	EGFR_HUMAN	Epidermal growth factor receptor OS=Homo sapiens GN=EGFR PE=1 SV=2	10561	137612	303	272	104	97	7764	1	1	1	1060.28	3177.81	3	3177.81	-0.0001	1	50.72	8.5e-06	K	TIQEVAGYVLIALNTVERIPLENLQIIR	G				File4189 Spectrum10898 scans: 16210
1	1	EGFR_HUMAN	Epidermal growth factor receptor OS=Homo sapiens GN=EGFR PE=1 SV=2	10561	137612	303	272	104	97	7765	1	1	1	795.461	3177.81	4	3177.81	0.0012	1	64.18	3.8e-07	K	TIQEVAGYVLIALNTVERIPLENLQIIR	G				File4189 Spectrum10899 scans: 16211
1	1	EGFR_HUMAN	Epidermal growth factor receptor OS=Homo sapiens GN=EGFR PE=1 SV=2	10561	137612	303	272	104	97	7784	1	1	1	637.261	3181.27	5	3181.27	-0.0008	2	18.24	0.015	K	SPSDCCHNQCAAGCTGPRESDCLVCRK	F				File4189 Spectrum673 scans: 2690
1	1	EGFR_HUMAN	Epidermal growth factor receptor OS=Homo sapiens GN=EGFR PE=1 SV=2	10561	137612	303	272	104	97	7786	1	1	1	796.324	3181.27	4	3181.27	0.0008	2	12.79	0.053	K	SPSDCCHNQCAAGCTGPRESDCLVCRK	F				File4189 Spectrum667 scans: 2683
1	1	EGFR_HUMAN	Epidermal growth factor receptor OS=Homo sapiens GN=EGFR PE=1 SV=2	10561	137612	303	272	104	97	7809	1	1	1	801.849	3203.37	4	3203.37	-0.0026	2	2.51	0.73	R	NYVVTDHGSCVRACGADSYEMEEDGVRK	C				File4189 Spectrum1854 scans: 4162
1	1	EGFR_HUMAN	Epidermal growth factor receptor OS=Homo sapiens GN=EGFR PE=1 SV=2	10561	137612	303	272	104	97	7810	1	1	1	801.85	3203.37	4	3203.37	0.0009	2	25.67	0.0033	R	NYVVTDHGSCVRACGADSYEMEEDGVRK	C				File4189 Spectrum1911 scans: 4243
1	1	EGFR_HUMAN	Epidermal growth factor receptor OS=Homo sapiens GN=EGFR PE=1 SV=2	10561	137612	303	272	104	97	7832	1	1	1	644.92	3219.56	5	3219.56	0.0007	1	32.22	0.00095	K	GSHQISLDNPDYQQDFFPKEAKPNGIFK	G				File4189 Spectrum4204 scans: 7171
1	1	EGFR_HUMAN	Epidermal growth factor receptor OS=Homo sapiens GN=EGFR PE=1 SV=2	10561	137612	303	272	104	97	7833	1	1	1	805.898	3219.56	4	3219.56	0.0019	1	39.76	0.00019	K	GSHQISLDNPDYQQDFFPKEAKPNGIFK	G				File4189 Spectrum4217 scans: 7188
1	1	EGFR_HUMAN	Epidermal growth factor receptor OS=Homo sapiens GN=EGFR PE=1 SV=2	10561	137612	303	272	104	97	7860	1	1	1	648.665	3238.29	5	3238.29	0.0011	2	29.38	0.0012	R	GKSPSDCCHNQCAAGCTGPRESDCLVCR	K				File4189 Spectrum731 scans: 2762
1	1	EGFR_HUMAN	Epidermal growth factor receptor OS=Homo sapiens GN=EGFR PE=1 SV=2	10561	137612	303	272	104	97	7861	1	1	1	1080.44	3238.29	3	3238.29	0.0014	2	26.92	0.002	R	GKSPSDCCHNQCAAGCTGPRESDCLVCR	K				File4189 Spectrum741 scans: 2774
1	1	EGFR_HUMAN	Epidermal growth factor receptor OS=Homo sapiens GN=EGFR PE=1 SV=2	10561	137612	303	272	104	97	7862	1	1	1	810.58	3238.29	4	3238.29	0.0015	2	9.8	0.1	R	GKSPSDCCHNQCAAGCTGPRESDCLVCR	K				File4189 Spectrum780 scans: 2824
1	1	EGFR_HUMAN	Epidermal growth factor receptor OS=Homo sapiens GN=EGFR PE=1 SV=2	10561	137612	303	272	104	97	7863	1	1	1	810.58	3238.29	4	3238.29	0.0018	2	29.69	0.0011	R	GKSPSDCCHNQCAAGCTGPRESDCLVCR	K				File4189 Spectrum724 scans: 2754
1	1	EGFR_HUMAN	Epidermal growth factor receptor OS=Homo sapiens GN=EGFR PE=1 SV=2	10561	137612	303	272	104	97	8110	1	1	1	1130.17	3387.48	3	3387.48	0.0009	1	17.47	0.036	R	DEATCKDTCPPLMLYNPTTYQMDVNPEGK	Y				File4189 Spectrum5227 scans: 8347
1	1	EGFR_HUMAN	Epidermal growth factor receptor OS=Homo sapiens GN=EGFR PE=1 SV=2	10561	137612	303	272	104	97	8118	1	1	1	1133.54	3397.61	3	3397.61	0	0	4.65	0.37	R	YSSDPTGALTEDSIDDTFLPVPEYINQSVPK	R				File4189 Spectrum6810 scans: 10142
1	1	EGFR_HUMAN	Epidermal growth factor receptor OS=Homo sapiens GN=EGFR PE=1 SV=2	10561	137612	303	272	104	97	8119	1	1	1	1133.54	3397.61	3	3397.61	0	0	80.22	4.7e-08	R	YSSDPTGALTEDSIDDTFLPVPEYINQSVPK	R				File4189 Spectrum6808 scans: 10140
1	1	EGFR_HUMAN	Epidermal growth factor receptor OS=Homo sapiens GN=EGFR PE=1 SV=2	10561	137612	303	272	104	97	8120	1	1	1	1133.54	3397.61	3	3397.61	0.0003	0	69.62	3.5e-07	R	YSSDPTGALTEDSIDDTFLPVPEYINQSVPK	R				File4189 Spectrum6743 scans: 10066
1	1	EGFR_HUMAN	Epidermal growth factor receptor OS=Homo sapiens GN=EGFR PE=1 SV=2	10561	137612	303	272	104	97	8121	1	1	1	1699.81	3397.61	2	3397.61	0.001	0	66.06	6.4e-07	R	YSSDPTGALTEDSIDDTFLPVPEYINQSVPK	R				File4189 Spectrum6757 scans: 10082
1	1	EGFR_HUMAN	Epidermal growth factor receptor OS=Homo sapiens GN=EGFR PE=1 SV=2	10561	137612	303	272	104	97	8160	1	1	1	857.168	3424.64	4	3424.64	-0.0003	2	63.3	1.2e-06	R	GNMYYENSYALAVLSNYDANKTGLKELPMR	N				File4189 Spectrum5993 scans: 9211
1	1	EGFR_HUMAN	Epidermal growth factor receptor OS=Homo sapiens GN=EGFR PE=1 SV=2	10561	137612	303	272	104	97	8448	1	1	1	1203.19	3606.56	3	3606.57	-0.0098	0	94.6	3.5e-10	R	ALMDEEDMDDVVDADEYLIPQQGFFSSPSTSR	T				File4189 Spectrum6935 scans: 10286
1	1	EGFR_HUMAN	Epidermal growth factor receptor OS=Homo sapiens GN=EGFR PE=1 SV=2	10561	137612	303	272	104	97	8449	1	1	1	1804.29	3606.56	2	3606.57	-0.0043	0	102.79	5.5e-11	R	ALMDEEDMDDVVDADEYLIPQQGFFSSPSTSR	T				File4189 Spectrum6950 scans: 10303
1	1	EGFR_HUMAN	Epidermal growth factor receptor OS=Homo sapiens GN=EGFR PE=1 SV=2	10561	137612	303	272	104	97	8450	1	1	1	1203.2	3606.56	3	3606.57	-0.0006	0	69.2	1.3e-07	R	ALMDEEDMDDVVDADEYLIPQQGFFSSPSTSR	T				File4189 Spectrum7032 scans: 10394
1	1	EGFR_HUMAN	Epidermal growth factor receptor OS=Homo sapiens GN=EGFR PE=1 SV=2	10561	137612	303	272	104	97	8451	1	1	1	1804.29	3606.57	2	3606.57	0.0021	0	24.12	0.0041	R	ALMDEEDMDDVVDADEYLIPQQGFFSSPSTSR	T				File4189 Spectrum7012 scans: 10371
1	1	EGFR_HUMAN	Epidermal growth factor receptor OS=Homo sapiens GN=EGFR PE=1 SV=2	10561	137612	303	272	104	97	8452	1	1	1	902.649	3606.57	4	3606.57	0.0034	0	92.17	6.4e-10	R	ALMDEEDMDDVVDADEYLIPQQGFFSSPSTSR	T				File4189 Spectrum6962 scans: 10316
1	1	EGFR_HUMAN	Epidermal growth factor receptor OS=Homo sapiens GN=EGFR PE=1 SV=2	10561	137612	303	272	104	97	8453	1	1	1	1203.2	3606.57	3	3606.57	0.0038	0	16.32	0.025	R	ALMDEEDMDDVVDADEYLIPQQGFFSSPSTSR	T				File4189 Spectrum6988 scans: 10344
1	1	EGFR_HUMAN	Epidermal growth factor receptor OS=Homo sapiens GN=EGFR PE=1 SV=2	10561	137612	303	272	104	97	8454	1	1	1	1203.2	3606.57	3	3606.57	0.0038	0	80.24	9.9e-09	R	ALMDEEDMDDVVDADEYLIPQQGFFSSPSTSR	T				File4189 Spectrum6986 scans: 10342
1	1	EGFR_HUMAN	Epidermal growth factor receptor OS=Homo sapiens GN=EGFR PE=1 SV=2	10561	137612	303	272	104	97	8485	1	1	1	1208.52	3622.55	3	3622.56	-0.0078	0	3.58	0.48	R	ALMDEEDMDDVVDADEYLIPQQGFFSSPSTSR	T	Oxidation (M)	0.00100000000000000000000000000000.0		File4189 Spectrum6608 scans: 9910
1	1	EGFR_HUMAN	Epidermal growth factor receptor OS=Homo sapiens GN=EGFR PE=1 SV=2	10561	137612	303	272	104	97	8486	1	1	1	1208.52	3622.55	3	3622.56	-0.0078	0	92.36	6.4e-10	R	ALMDEEDMDDVVDADEYLIPQQGFFSSPSTSR	T	Oxidation (M)	0.00100000000000000000000000000000.0		File4189 Spectrum6605 scans: 9907
1	1	EGFR_HUMAN	Epidermal growth factor receptor OS=Homo sapiens GN=EGFR PE=1 SV=2	10561	137612	303	272	104	97	8487	1	1	1	1208.53	3622.56	3	3622.56	-0.0027	0	72.97	5.8e-08	R	ALMDEEDMDDVVDADEYLIPQQGFFSSPSTSR	T	Oxidation (M)	0.00000001000000000000000000000000.0		File4189 Spectrum6461 scans: 9751
1	1	EGFR_HUMAN	Epidermal growth factor receptor OS=Homo sapiens GN=EGFR PE=1 SV=2	10561	137612	303	272	104	97	8488	1	1	1	1208.53	3622.56	3	3622.56	0.001	0	22.71	0.0059	R	ALMDEEDMDDVVDADEYLIPQQGFFSSPSTSR	T	Oxidation (M)	0.00100000000000000000000000000000.0		File4189 Spectrum6664 scans: 9975
1	1	EGFR_HUMAN	Epidermal growth factor receptor OS=Homo sapiens GN=EGFR PE=1 SV=2	10561	137612	303	272	104	97	8492	1	1	1	907.661	3626.62	4	3626.62	-0.0081	2	46.97	5.3e-05	K	IISNRGENSCKATGQVCHALCSPEGCWGPEPR	D				File4189 Spectrum2644 scans: 5199
1	1	EGFR_HUMAN	Epidermal growth factor receptor OS=Homo sapiens GN=EGFR PE=1 SV=2	10561	137612	303	272	104	97	8493	1	1	1	907.663	3626.62	4	3626.62	0.0007	2	87.72	4.5e-09	K	IISNRGENSCKATGQVCHALCSPEGCWGPEPR	D				File4189 Spectrum2530 scans: 5065
1	1	EGFR_HUMAN	Epidermal growth factor receptor OS=Homo sapiens GN=EGFR PE=1 SV=2	10561	137612	303	272	104	97	8494	1	1	1	726.333	3626.63	5	3626.62	0.003	2	25.25	0.0084	K	IISNRGENSCKATGQVCHALCSPEGCWGPEPR	D				File4189 Spectrum2587 scans: 5131
1	1	EGFR_HUMAN	Epidermal growth factor receptor OS=Homo sapiens GN=EGFR PE=1 SV=2	10561	137612	303	272	104	97	8495	1	1	1	726.333	3626.63	5	3626.62	0.0039	2	16.81	0.059	K	IISNRGENSCKATGQVCHALCSPEGCWGPEPR	D				File4189 Spectrum2520 scans: 5052
1	1	EGFR_HUMAN	Epidermal growth factor receptor OS=Homo sapiens GN=EGFR PE=1 SV=2	10561	137612	303	272	104	97	8496	1	1	1	726.335	3626.64	5	3626.62	0.0134	2	4.82	0.94	K	IISNRGENSCKATGQVCHALCSPEGCWGPEPR	D				File4189 Spectrum2688 scans: 5256
1	1	EGFR_HUMAN	Epidermal growth factor receptor OS=Homo sapiens GN=EGFR PE=1 SV=2	10561	137612	303	272	104	97	8628	1	1	1	923.669	3690.65	4	3690.65	-0.0003	2	66.04	6.5e-07	K	FRDEATCKDTCPPLMLYNPTTYQMDVNPEGK	Y				File4189 Spectrum4675 scans: 7719
1	1	EGFR_HUMAN	Epidermal growth factor receptor OS=Homo sapiens GN=EGFR PE=1 SV=2	10561	137612	303	272	104	97	8629	1	1	1	923.669	3690.65	4	3690.65	0.0014	2	53.66	1.1e-05	K	FRDEATCKDTCPPLMLYNPTTYQMDVNPEGK	Y				File4189 Spectrum4747 scans: 7801
1	1	EGFR_HUMAN	Epidermal growth factor receptor OS=Homo sapiens GN=EGFR PE=1 SV=2	10561	137612	303	272	104	97	8630	1	1	1	1231.22	3690.65	3	3690.65	0.0043	2	89.31	3e-09	K	FRDEATCKDTCPPLMLYNPTTYQMDVNPEGK	Y				File4189 Spectrum4700 scans: 7748
1	1	EGFR_HUMAN	Epidermal growth factor receptor OS=Homo sapiens GN=EGFR PE=1 SV=2	10561	137612	303	272	104	97	8645	1	1	1	1233.23	3696.66	3	3696.66	-0.0001	1	40.17	0.00024	K	DTCPPLMLYNPTTYQMDVNPEGKYSFGATCVK	K				File4189 Spectrum6005 scans: 9225
1	1	EGFR_HUMAN	Epidermal growth factor receptor OS=Homo sapiens GN=EGFR PE=1 SV=2	10561	137612	303	272	104	97	8791	1	1	1	957.198	3824.76	4	3824.76	0.0056	2	15.97	0.1	K	DTCPPLMLYNPTTYQMDVNPEGKYSFGATCVKK	C				File4189 Spectrum5570 scans: 8727
1	1	EGFR_HUMAN	Epidermal growth factor receptor OS=Homo sapiens GN=EGFR PE=1 SV=2	10561	137612	303	272	104	97	9125	1	1	1	1020.75	4078.97	4	4079.01	-0.0367	2	19.16	0.016	R	TPLLSSLSATSNNSTVACIDRNGLQSCPIKEDSFLQR	Y				File4189 Spectrum5548 scans: 8703
1	1	EGFR_HUMAN	Epidermal growth factor receptor OS=Homo sapiens GN=EGFR PE=1 SV=2	10561	137612	303	272	104	97	9128	1	1	1	1020.76	4079	4	4079.01	-0.006	2	17.48	0.023	R	TPLLSSLSATSNNSTVACIDRNGLQSCPIKEDSFLQR	Y				File4189 Spectrum5006 scans: 8097
1	1	EGFR_HUMAN	Epidermal growth factor receptor OS=Homo sapiens GN=EGFR PE=1 SV=2	10561	137612	303	272	104	97	9129	1	1	1	1020.76	4079	4	4079.01	-0.0035	2	1.42	0.73	R	TPLLSSLSATSNNSTVACIDRNGLQSCPIKEDSFLQR	Y				File4189 Spectrum9496 scans: 13532
1	1	EGFR_HUMAN	Epidermal growth factor receptor OS=Homo sapiens GN=EGFR PE=1 SV=2	10561	137612	303	272	104	97	9130	1	1	1	1360.67	4079	3	4079.01	-0.0026	2	38.38	0.00025	R	TPLLSSLSATSNNSTVACIDRNGLQSCPIKEDSFLQR	Y				File4189 Spectrum5044 scans: 8141
1	1	EGFR_HUMAN	Epidermal growth factor receptor OS=Homo sapiens GN=EGFR PE=1 SV=2	10561	137612	303	272	104	97	9641	1	1	1	1101.24	4400.94	4	4400.94	-0.0031	2	51.56	9.4e-06	R	DEATCKDTCPPLMLYNPTTYQMDVNPEGKYSFGATCVK	K				File4189 Spectrum5668 scans: 8840
1	1	EGFR_HUMAN	Epidermal growth factor receptor OS=Homo sapiens GN=EGFR PE=1 SV=2	10561	137612	303	272	104	97	9644	1	1	1	883.23	4411.12	5	4411.11	0.0009	2	50.61	4.3e-05	K	GSHQISLDNPDYQQDFFPKEAKPNGIFKGSTAENAEYLR	V				File4189 Spectrum4214 scans: 7185
1	1	EGFR_HUMAN	Epidermal growth factor receptor OS=Homo sapiens GN=EGFR PE=1 SV=2	10561	137612	303	272	104	97	9645	1	1	1	736.194	4411.12	6	4411.11	0.006	2	37.35	0.00031	K	GSHQISLDNPDYQQDFFPKEAKPNGIFKGSTAENAEYLR	V				File4189 Spectrum4216 scans: 7187
1	1	EGFR_HUMAN	Epidermal growth factor receptor OS=Homo sapiens GN=EGFR PE=1 SV=2	10561	137612	303	272	104	97	9766	1	1	1	1134.31	4533.22	4	4533.21	0.0085	0	23.19	0.0068	R	IYTHQSDVWSYGVTVWELMTFGSKPYDGIPASEISSILEK	G				File4189 Spectrum8986 scans: 12719
1	1	EGFR_HUMAN	Epidermal growth factor receptor OS=Homo sapiens GN=EGFR PE=1 SV=2	10561	137612	303	272	104	97	9920	1	1	1	1169.79	4675.12	4	4675.1	0.0185	1	6.03	0.5	R	FSNNPALCNVESIQWRDIVSSDFLSNMSMDFQNHLGSCQK	C				File4189 Spectrum7468 scans: 10892
1		ERBB2_HUMAN	Receptor tyrosine-protein kinase erbB-2 OS=Homo sapiens GN=ERBB2 PE=1 SV=1	202	141185	6	6	4	4	2047	1	0	1	549.835	1097.66	2	1097.66	0.0002	1	19.35	0.051	R	DLAARNVLVK	S				File4189 Spectrum1835 scans: 4139
1		ERBB2_HUMAN	Receptor tyrosine-protein kinase erbB-2 OS=Homo sapiens GN=ERBB2 PE=1 SV=1	202	141185	6	6	4	4	2545	1	0	1	599.827	1197.64	2	1197.64	-0.0001	0	63.83	1.9e-06	K	VLGSGAFGTVYK	G				File4189 Spectrum3200 scans: 5948
1		ERBB2_HUMAN	Receptor tyrosine-protein kinase erbB-2 OS=Homo sapiens GN=ERBB2 PE=1 SV=1	202	141185	6	6	4	4	2546	1	0	1	599.827	1197.64	2	1197.64	0.0004	0	71.98	6.1e-07	K	VLGSGAFGTVYK	G				File4189 Spectrum3155 scans: 5886
1		ERBB2_HUMAN	Receptor tyrosine-protein kinase erbB-2 OS=Homo sapiens GN=ERBB2 PE=1 SV=1	202	141185	6	6	4	4	4987	1	0	1	673.356	2017.04	3	2017.05	-0.0003	0	28.95	0.0019	R	LPQPPICTIDVYMIMVK	C				File4189 Spectrum7259 scans: 10652
1		ERBB2_HUMAN	Receptor tyrosine-protein kinase erbB-2 OS=Homo sapiens GN=ERBB2 PE=1 SV=1	202	141185	6	6	4	4	4988	1	0	1	1009.53	2017.05	2	2017.05	0.0006	0	52.81	1.1e-05	R	LPQPPICTIDVYMIMVK	C				File4189 Spectrum7257 scans: 10650
1		ERBB2_HUMAN	Receptor tyrosine-protein kinase erbB-2 OS=Homo sapiens GN=ERBB2 PE=1 SV=1	202	141185	6	6	4	4	5964	1	0	1	787.41	2359.21	3	2359.21	-0.001	1	53.34	1e-05	K	GERLPQPPICTIDVYMIMVK	C				File4189 Spectrum6716 scans: 10037
1		ERBB4_HUMAN	Receptor tyrosine-protein kinase erbB-4 OS=Homo sapiens GN=ERBB4 PE=1 SV=1	116	150020	5	4	4	3	2047	1	0	1	549.835	1097.66	2	1097.66	0.0002	1	19.35	0.051	R	DLAARNVLVK	S				File4189 Spectrum1835 scans: 4139
1		ERBB4_HUMAN	Receptor tyrosine-protein kinase erbB-4 OS=Homo sapiens GN=ERBB4 PE=1 SV=1	116	150020	5	4	4	3	2545	1	0	1	599.827	1197.64	2	1197.64	-0.0001	0	63.83	1.9e-06	K	VLGSGAFGTVYK	G				File4189 Spectrum3200 scans: 5948
1		ERBB4_HUMAN	Receptor tyrosine-protein kinase erbB-4 OS=Homo sapiens GN=ERBB4 PE=1 SV=1	116	150020	5	4	4	3	2546	1	0	1	599.827	1197.64	2	1197.64	0.0004	0	71.98	6.1e-07	K	VLGSGAFGTVYK	G				File4189 Spectrum3155 scans: 5886
1		ERBB4_HUMAN	Receptor tyrosine-protein kinase erbB-4 OS=Homo sapiens GN=ERBB4 PE=1 SV=1	116	150020	5	4	4	3	2589	1	0	1	402.911	1205.71	3	1205.71	0.0019	2	19.62	0.037	R	RLVHRDLAAR	N				File4189 Spectrum91 scans: 1979
1		ERBB4_HUMAN	Receptor tyrosine-protein kinase erbB-4 OS=Homo sapiens GN=ERBB4 PE=1 SV=1	116	150020	5	4	4	3	3207	1	0	1	689.816	1377.62	2	1377.62	-0.0003	0	10.25	0.43	K	CWMIDADSRPK	F				File4189 Spectrum2473 scans: 4980
2	1	K2C1_HUMAN	Keratin, type II cytoskeletal 1 OS=Homo sapiens GN=KRT1 PE=1 SV=6	2929	66170	67	62	36	34	680	1	1	1	416.748	831.482	2	831.481	0.0004	0	47.95	0.00018	K	SISISVAR	G				File4189 Spectrum1927 scans: 4269
2	1	K2C1_HUMAN	Keratin, type II cytoskeletal 1 OS=Homo sapiens GN=KRT1 PE=1 SV=6	2929	66170	67	62	36	34	681	1	1	1	416.748	831.482	2	831.481	0.0009	0	54.7	3.9e-05	K	SISISVAR	G				File4189 Spectrum1899 scans: 4219
2	1	K2C1_HUMAN	Keratin, type II cytoskeletal 1 OS=Homo sapiens GN=KRT1 PE=1 SV=6	2929	66170	67	62	36	34	880	1	1	1	437.753	873.492	2	873.492	-0.0001	0	47.77	0.00022	R	SLVNLGGSK	S				File4189 Spectrum1873 scans: 4185
2	1	K2C1_HUMAN	Keratin, type II cytoskeletal 1 OS=Homo sapiens GN=KRT1 PE=1 SV=6	2929	66170	67	62	36	34	1754	1	1	1	517.262	1032.51	2	1032.51	0	0	35.29	0.0033	R	TLLEGEESR	M				File4189 Spectrum1086 scans: 3197
2	1	K2C1_HUMAN	Keratin, type II cytoskeletal 1 OS=Homo sapiens GN=KRT1 PE=1 SV=6	2929	66170	67	62	36	34	1854	1	1	1	533.264	1064.51	2	1064.51	0	0	43.9	9.2e-05	K	AQYEDIAQK	S				File4189 Spectrum683 scans: 2704
2	1	K2C1_HUMAN	Keratin, type II cytoskeletal 1 OS=Homo sapiens GN=KRT1 PE=1 SV=6	2929	66170	67	62	36	34	2468	1	1	1	590.304	1178.59	2	1178.59	0.0002	0	69.62	1.3e-06	K	YEELQITAGR	H				File4189 Spectrum2322 scans: 4782
2	1	K2C1_HUMAN	Keratin, type II cytoskeletal 1 OS=Homo sapiens GN=KRT1 PE=1 SV=6	2929	66170	67	62	36	34	2839	1	1	1	633.322	1264.63	2	1264.63	0.0004	0	57.27	2e-05	R	TNAENEFVTIK	K				File4189 Spectrum2604 scans: 5151
2	1	K2C1_HUMAN	Keratin, type II cytoskeletal 1 OS=Homo sapiens GN=KRT1 PE=1 SV=6	2929	66170	67	62	36	34	2900	1	1	1	639.359	1276.7	2	1276.7	0.0001	0	65.48	2.6e-06	K	LALDLEIATYR	T				File4189 Spectrum5162 scans: 8274
2	1	K2C1_HUMAN	Keratin, type II cytoskeletal 1 OS=Homo sapiens GN=KRT1 PE=1 SV=6	2929	66170	67	62	36	34	2909	1	1	1	640.828	1279.64	2	1279.64	-0.0001	1	46.4	4.5e-05	K	AQYEDIAQKSK	A				File4189 Spectrum411 scans: 2364
2	1	K2C1_HUMAN	Keratin, type II cytoskeletal 1 OS=Homo sapiens GN=KRT1 PE=1 SV=6	2929	66170	67	62	36	34	2996	1	1	1	651.861	1301.71	2	1301.71	-0.0001	0	85.46	3.3e-08	R	SLDLDSIIAEVK	A				File4189 Spectrum6301 scans: 9565
2	1	K2C1_HUMAN	Keratin, type II cytoskeletal 1 OS=Homo sapiens GN=KRT1 PE=1 SV=6	2929	66170	67	62	36	34	2997	1	1	1	651.861	1301.71	2	1301.71	0	0	49.64	0.00012	R	SLDLDSIIAEVK	A				File4189 Spectrum6353 scans: 9630
2	1	K2C1_HUMAN	Keratin, type II cytoskeletal 1 OS=Homo sapiens GN=KRT1 PE=1 SV=6	2929	66170	67	62	36	34	3019	1	1	0	436.89	1307.65	3	1307.65	0.0008	2	38.69	0.00028	R	NKYEDEINKR	T				File4189 Spectrum331 scans: 2261
2	1	K2C1_HUMAN	Keratin, type II cytoskeletal 1 OS=Homo sapiens GN=KRT1 PE=1 SV=6	2929	66170	67	62	36	34	3108	1	1	1	670.838	1339.66	2	1339.66	0.0002	1	46.99	0.00014	K	SKAEAESLYQSK	Y				File4189 Spectrum525 scans: 2503
2	1	K2C1_HUMAN	Keratin, type II cytoskeletal 1 OS=Homo sapiens GN=KRT1 PE=1 SV=6	2929	66170	67	62	36	34	3237	1	1	1	465.249	1392.72	3	1392.72	-0.0002	1	59.04	2.9e-06	R	TNAENEFVTIKK	D				File4189 Spectrum1760 scans: 4042
2	1	K2C1_HUMAN	Keratin, type II cytoskeletal 1 OS=Homo sapiens GN=KRT1 PE=1 SV=6	2929	66170	67	62	36	34	3238	1	1	1	697.37	1392.73	2	1392.72	0.0002	1	77.66	5.2e-08	R	TNAENEFVTIKK	D				File4189 Spectrum1753 scans: 4033
2	1	K2C1_HUMAN	Keratin, type II cytoskeletal 1 OS=Homo sapiens GN=KRT1 PE=1 SV=6	2929	66170	67	62	36	34	3470	1	1	0	738.396	1474.78	2	1474.78	-0.0001	0	68.95	1.6e-06	R	FLEQQNQVLQTK	W				File4189 Spectrum2209 scans: 4637
2	1	K2C1_HUMAN	Keratin, type II cytoskeletal 1 OS=Homo sapiens GN=KRT1 PE=1 SV=6	2929	66170	67	62	36	34	3885	1	1	1	819.933	1637.85	2	1637.85	-0.0003	1	84.33	3.7e-08	K	SLNNQFASFIDKVR	F				File4189 Spectrum5103 scans: 8208
2	1	K2C1_HUMAN	Keratin, type II cytoskeletal 1 OS=Homo sapiens GN=KRT1 PE=1 SV=6	2929	66170	67	62	36	34	3886	1	1	1	546.958	1637.85	3	1637.85	0	1	47.12	0.0002	K	SLNNQFASFIDKVR	F				File4189 Spectrum5066 scans: 8165
2	1	K2C1_HUMAN	Keratin, type II cytoskeletal 1 OS=Homo sapiens GN=KRT1 PE=1 SV=6	2929	66170	67	62	36	34	3947	1	1	1	829.4	1656.78	2	1656.79	-0.0007	0	75.99	7.5e-08	R	SGGGFSSGSAGIINYQR	R				File4189 Spectrum2793 scans: 5397
2	1	K2C1_HUMAN	Keratin, type II cytoskeletal 1 OS=Homo sapiens GN=KRT1 PE=1 SV=6	2929	66170	67	62	36	34	4023	1	1	1	844.489	1686.96	2	1686.96	-0.0003	1	91.4	2.7e-09	R	SLVNLGGSKSISISVAR	G				File4189 Spectrum3650 scans: 6507
2	1	K2C1_HUMAN	Keratin, type II cytoskeletal 1 OS=Homo sapiens GN=KRT1 PE=1 SV=6	2929	66170	67	62	36	34	4024	1	1	1	563.328	1686.96	3	1686.96	0.0001	1	61.45	2.6e-06	R	SLVNLGGSKSISISVAR	G				File4189 Spectrum3651 scans: 6509
2	1	K2C1_HUMAN	Keratin, type II cytoskeletal 1 OS=Homo sapiens GN=KRT1 PE=1 SV=6	2929	66170	67	62	36	34	4208	1	1	1	584.614	1750.82	3	1750.82	0	1	14.85	0.052	R	GSGGGSSGGSIGGRGSSSGGVK	S				File4189 Spectrum51 scans: 1935
2	1	K2C1_HUMAN	Keratin, type II cytoskeletal 1 OS=Homo sapiens GN=KRT1 PE=1 SV=6	2929	66170	67	62	36	34	4235	1	1	1	883.37	1764.73	2	1764.73	-0.0014	0	94.4	4e-10	R	FSSCGGGGGSFGAGGGFGSR	S				File4189 Spectrum2495 scans: 5018
2	1	K2C1_HUMAN	Keratin, type II cytoskeletal 1 OS=Homo sapiens GN=KRT1 PE=1 SV=6	2929	66170	67	62	36	34	4236	1	1	1	883.37	1764.73	2	1764.73	-0.0014	0	115.29	3.3e-12	R	FSSCGGGGGSFGAGGGFGSR	S				File4189 Spectrum2408 scans: 4893
2	1	K2C1_HUMAN	Keratin, type II cytoskeletal 1 OS=Homo sapiens GN=KRT1 PE=1 SV=6	2929	66170	67	62	36	34	4237	1	1	1	883.37	1764.73	2	1764.73	-0.001	0	53.27	5.2e-06	R	FSSCGGGGGSFGAGGGFGSR	S				File4189 Spectrum2668 scans: 5228
2	1	K2C1_HUMAN	Keratin, type II cytoskeletal 1 OS=Homo sapiens GN=KRT1 PE=1 SV=6	2929	66170	67	62	36	34	4238	1	1	1	883.371	1764.73	2	1764.73	-0.0005	0	129.6	1.2e-13	R	FSSCGGGGGSFGAGGGFGSR	S				File4189 Spectrum2355 scans: 4824
2	1	K2C1_HUMAN	Keratin, type II cytoskeletal 1 OS=Homo sapiens GN=KRT1 PE=1 SV=6	2929	66170	67	62	36	34	4239	1	1	1	883.371	1764.73	2	1764.73	-0.0003	0	136.75	2.3e-14	R	FSSCGGGGGSFGAGGGFGSR	S				File4189 Spectrum2457 scans: 4958
2	1	K2C1_HUMAN	Keratin, type II cytoskeletal 1 OS=Homo sapiens GN=KRT1 PE=1 SV=6	2929	66170	67	62	36	34	4397	1	1	1	907.45	1812.89	2	1812.89	-0.0005	1	15.9	0.068	R	SGGGFSSGSAGIINYQRR	T				File4189 Spectrum2326 scans: 4786
2	1	K2C1_HUMAN	Keratin, type II cytoskeletal 1 OS=Homo sapiens GN=KRT1 PE=1 SV=6	2929	66170	67	62	36	34	4398	1	1	1	605.303	1812.89	3	1812.89	0.0004	1	44.06	7.4e-05	R	SGGGFSSGSAGIINYQRR	T				File4189 Spectrum2333 scans: 4794
2	1	K2C1_HUMAN	Keratin, type II cytoskeletal 1 OS=Homo sapiens GN=KRT1 PE=1 SV=6	2929	66170	67	62	36	34	4919	1	1	1	665.331	1992.97	3	1992.97	0.0004	0	54.22	8.2e-06	R	THNLEPYFESFINNLR	R				File4189 Spectrum6625 scans: 9929
2	1	K2C1_HUMAN	Keratin, type II cytoskeletal 1 OS=Homo sapiens GN=KRT1 PE=1 SV=6	2929	66170	67	62	36	34	4920	1	1	1	997.494	1992.97	2	1992.98	-0.002	1	22.31	0.0081	K	SSGGSSSVKFVSTTYSGVTR	-				File4189 Spectrum2391 scans: 4868
2	1	K2C1_HUMAN	Keratin, type II cytoskeletal 1 OS=Homo sapiens GN=KRT1 PE=1 SV=6	2929	66170	67	62	36	34	4921	1	1	1	665.332	1992.98	3	1992.98	0.0005	1	36.71	0.00036	K	SSGGSSSVKFVSTTYSGVTR	-				File4189 Spectrum2389 scans: 4866
2	1	K2C1_HUMAN	Keratin, type II cytoskeletal 1 OS=Homo sapiens GN=KRT1 PE=1 SV=6	2929	66170	67	62	36	34	5429	1	1	1	728.715	2183.12	3	2183.12	0.0034	2	68.06	4.2e-07	K	NKLNDLEDALQQAKEDLAR	L				File4189 Spectrum5814 scans: 9006
2	1	K2C1_HUMAN	Keratin, type II cytoskeletal 1 OS=Homo sapiens GN=KRT1 PE=1 SV=6	2929	66170	67	62	36	34	5713	1	1	1	759.709	2276.1	3	2276.1	-0.0004	2	4.96	0.34	R	SGYRSGGGFSSGSAGIINYQRR	T				File4189 Spectrum2175 scans: 4592
2	1	K2C1_HUMAN	Keratin, type II cytoskeletal 1 OS=Homo sapiens GN=KRT1 PE=1 SV=6	2929	66170	67	62	36	34	5764	1	1	1	762.713	2285.12	3	2285.12	-0.0007	1	66.97	5.3e-07	K	AEAESLYQSKYEELQITAGR	H				File4189 Spectrum3466 scans: 6278
2	1	K2C1_HUMAN	Keratin, type II cytoskeletal 1 OS=Homo sapiens GN=KRT1 PE=1 SV=6	2929	66170	67	62	36	34	5779	1	1	1	764.74	2291.2	3	2291.2	-0.0012	1	12.09	0.073	K	LALDLEIATYRTLLEGEESR	M				File4189 Spectrum6693 scans: 10011
2	1	K2C1_HUMAN	Keratin, type II cytoskeletal 1 OS=Homo sapiens GN=KRT1 PE=1 SV=6	2929	66170	67	62	36	34	5786	1	1	1	1147.49	2292.97	2	2292.97	0.0021	1	6.85	0.29	R	SGGGGGRFSSCGGGGGSFGAGGGFGSR	S				File4189 Spectrum2038 scans: 4413
2	1	K2C1_HUMAN	Keratin, type II cytoskeletal 1 OS=Homo sapiens GN=KRT1 PE=1 SV=6	2929	66170	67	62	36	34	5787	1	1	1	765.331	2292.97	3	2292.97	0.0023	1	94.41	5.1e-10	R	SGGGGGRFSSCGGGGGSFGAGGGFGSR	S				File4189 Spectrum2029 scans: 4402
2	1	K2C1_HUMAN	Keratin, type II cytoskeletal 1 OS=Homo sapiens GN=KRT1 PE=1 SV=6	2929	66170	67	62	36	34	5928	1	1	1	1175.11	2348.21	2	2348.21	-0.0025	1	46.78	4.1e-05	R	SLDLDSIIAEVKAQYEDIAQK	S				File4189 Spectrum8026 scans: 11545
2	1	K2C1_HUMAN	Keratin, type II cytoskeletal 1 OS=Homo sapiens GN=KRT1 PE=1 SV=6	2929	66170	67	62	36	34	5929	1	1	1	1175.11	2348.21	2	2348.21	-0.002	1	63.09	1.2e-06	R	SLDLDSIIAEVKAQYEDIAQK	S				File4189 Spectrum7950 scans: 11461
2	1	K2C1_HUMAN	Keratin, type II cytoskeletal 1 OS=Homo sapiens GN=KRT1 PE=1 SV=6	2929	66170	67	62	36	34	5931	1	1	1	588.06	2348.21	4	2348.21	-0.0004	1	31.58	0.002	R	SLDLDSIIAEVKAQYEDIAQK	S				File4189 Spectrum7983 scans: 11497
2	1	K2C1_HUMAN	Keratin, type II cytoskeletal 1 OS=Homo sapiens GN=KRT1 PE=1 SV=6	2929	66170	67	62	36	34	5932	1	1	1	783.745	2348.21	3	2348.21	0.0004	1	59.81	2.5e-06	R	SLDLDSIIAEVKAQYEDIAQK	S				File4189 Spectrum7948 scans: 11459
2	1	K2C1_HUMAN	Keratin, type II cytoskeletal 1 OS=Homo sapiens GN=KRT1 PE=1 SV=6	2929	66170	67	62	36	34	5933	1	1	1	783.745	2348.21	3	2348.21	0.0006	1	63.59	1.1e-06	R	SLDLDSIIAEVKAQYEDIAQK	S				File4189 Spectrum8010 scans: 11528
2	1	K2C1_HUMAN	Keratin, type II cytoskeletal 1 OS=Homo sapiens GN=KRT1 PE=1 SV=6	2929	66170	67	62	36	34	5934	1	1	1	783.745	2348.21	3	2348.21	0.0034	1	18.4	0.019	R	SLDLDSIIAEVKAQYEDIAQK	S				File4189 Spectrum8082 scans: 11608
2	1	K2C1_HUMAN	Keratin, type II cytoskeletal 1 OS=Homo sapiens GN=KRT1 PE=1 SV=6	2929	66170	67	62	36	34	6017	1	1	1	792.057	2373.15	3	2373.15	-0.0021	2	58.27	3.4e-06	R	TNAENEFVTIKKDVDGAYMTK	V				File4189 Spectrum3924 scans: 6851
2	1	K2C1_HUMAN	Keratin, type II cytoskeletal 1 OS=Homo sapiens GN=KRT1 PE=1 SV=6	2929	66170	67	62	36	34	6018	1	1	1	594.295	2373.15	4	2373.15	-0.0001	2	38.49	0.00025	R	TNAENEFVTIKKDVDGAYMTK	V				File4189 Spectrum3922 scans: 6849
2	1	K2C1_HUMAN	Keratin, type II cytoskeletal 1 OS=Homo sapiens GN=KRT1 PE=1 SV=6	2929	66170	67	62	36	34	6040	1	1	1	1192.48	2382.94	2	2382.94	-0.0012	0	130.46	9e-14	R	GGGGGGYGSGGSSYGSGGGSYGSGGGGGGGR	G				File4189 Spectrum624 scans: 2625
2	1	K2C1_HUMAN	Keratin, type II cytoskeletal 1 OS=Homo sapiens GN=KRT1 PE=1 SV=6	2929	66170	67	62	36	34	6041	1	1	1	1192.48	2382.94	2	2382.94	-0.0002	0	140.72	8.5e-15	R	GGGGGGYGSGGSSYGSGGGSYGSGGGGGGGR	G				File4189 Spectrum562 scans: 2550
2	1	K2C1_HUMAN	Keratin, type II cytoskeletal 1 OS=Homo sapiens GN=KRT1 PE=1 SV=6	2929	66170	67	62	36	34	6042	1	1	1	795.322	2382.95	3	2382.94	0.0005	0	67.41	1.8e-07	R	GGGGGGYGSGGSSYGSGGGSYGSGGGGGGGR	G				File4189 Spectrum576 scans: 2565
2	1	K2C1_HUMAN	Keratin, type II cytoskeletal 1 OS=Homo sapiens GN=KRT1 PE=1 SV=6	2929	66170	67	62	36	34	6048	1	1	1	796.396	2386.17	3	2386.17	0.0001	2	38.15	0.00026	K	AQYEDIAQKSKAEAESLYQSK	Y				File4189 Spectrum3356 scans: 6139
2	1	K2C1_HUMAN	Keratin, type II cytoskeletal 1 OS=Homo sapiens GN=KRT1 PE=1 SV=6	2929	66170	67	62	36	34	6351	1	1	1	834.422	2500.24	3	2500.24	0.0002	2	43.12	9e-05	K	SKAEAESLYQSKYEELQITAGR	H				File4189 Spectrum3182 scans: 5921
2	1	K2C1_HUMAN	Keratin, type II cytoskeletal 1 OS=Homo sapiens GN=KRT1 PE=1 SV=6	2929	66170	67	62	36	34	6352	1	1	1	626.069	2500.25	4	2500.24	0.0011	2	55.59	6.1e-06	K	SKAEAESLYQSKYEELQITAGR	H				File4189 Spectrum3131 scans: 5856
2	1	K2C1_HUMAN	Keratin, type II cytoskeletal 1 OS=Homo sapiens GN=KRT1 PE=1 SV=6	2929	66170	67	62	36	34	6353	1	1	1	834.423	2500.25	3	2500.24	0.0013	2	102.85	5e-10	K	SKAEAESLYQSKYEELQITAGR	H				File4189 Spectrum3121 scans: 5841
2	1	K2C1_HUMAN	Keratin, type II cytoskeletal 1 OS=Homo sapiens GN=KRT1 PE=1 SV=6	2929	66170	67	62	36	34	6354	1	1	1	1251.13	2500.25	2	2500.24	0.0015	2	94.13	1.5e-09	K	SKAEAESLYQSKYEELQITAGR	H				File4189 Spectrum3128 scans: 5851
2	1	K2C1_HUMAN	Keratin, type II cytoskeletal 1 OS=Homo sapiens GN=KRT1 PE=1 SV=6	2929	66170	67	62	36	34	6511	1	1	1	641.842	2563.34	4	2563.34	-0.0002	2	50.32	2.2e-05	R	SLDLDSIIAEVKAQYEDIAQKSK	A				File4189 Spectrum7676 scans: 11144
2	1	K2C1_HUMAN	Keratin, type II cytoskeletal 1 OS=Homo sapiens GN=KRT1 PE=1 SV=6	2929	66170	67	62	36	34	6512	1	1	1	855.454	2563.34	3	2563.34	0.0011	2	72.23	2.5e-07	R	SLDLDSIIAEVKAQYEDIAQKSK	A				File4189 Spectrum7677 scans: 11145
2	1	K2C1_HUMAN	Keratin, type II cytoskeletal 1 OS=Homo sapiens GN=KRT1 PE=1 SV=6	2929	66170	67	62	36	34	6513	1	1	1	1283.09	2564.16	2	2564.16	-0.0015	0	107.94	5.5e-11	R	MSGECAPNVSVSVSTSHTTISGGGSR	G				File4189 Spectrum2232 scans: 4666
2	1	K2C1_HUMAN	Keratin, type II cytoskeletal 1 OS=Homo sapiens GN=KRT1 PE=1 SV=6	2929	66170	67	62	36	34	6514	1	1	1	855.727	2564.16	3	2564.16	-0.0004	0	1.14	2.7	R	MSGECAPNVSVSVSTSHTTISGGGSR	G				File4189 Spectrum2417 scans: 4904
2	1	K2C1_HUMAN	Keratin, type II cytoskeletal 1 OS=Homo sapiens GN=KRT1 PE=1 SV=6	2929	66170	67	62	36	34	6515	1	1	1	855.727	2564.16	3	2564.16	-0.0002	0	68	5.5e-07	R	MSGECAPNVSVSVSTSHTTISGGGSR	G				File4189 Spectrum2271 scans: 4716
2	1	K2C1_HUMAN	Keratin, type II cytoskeletal 1 OS=Homo sapiens GN=KRT1 PE=1 SV=6	2929	66170	67	62	36	34	6516	1	1	1	855.727	2564.16	3	2564.16	0.0009	0	21.12	0.028	R	MSGECAPNVSVSVSTSHTTISGGGSR	G				File4189 Spectrum2357 scans: 4826
2	1	K2C1_HUMAN	Keratin, type II cytoskeletal 1 OS=Homo sapiens GN=KRT1 PE=1 SV=6	2929	66170	67	62	36	34	6517	1	1	1	855.727	2564.16	3	2564.16	0.0012	0	66.1	9e-07	R	MSGECAPNVSVSVSTSHTTISGGGSR	G				File4189 Spectrum2215 scans: 4644
2	1	K2C1_HUMAN	Keratin, type II cytoskeletal 1 OS=Homo sapiens GN=KRT1 PE=1 SV=6	2929	66170	67	62	36	34	6554	1	1	1	861.059	2580.16	3	2580.15	0.0009	0	73.2	1.4e-07	R	MSGECAPNVSVSVSTSHTTISGGGSR	G	Oxidation (M)	0.10000000000000000000000000.0		File4189 Spectrum2012 scans: 4381
2	1	K2C1_HUMAN	Keratin, type II cytoskeletal 1 OS=Homo sapiens GN=KRT1 PE=1 SV=6	2929	66170	67	62	36	34	6699	1	1	1	661.589	2642.33	4	2642.33	0.0014	2	25.31	0.0042	K	QISNLQQSISDAEQRGENALKDAK	N				File4189 Spectrum4704 scans: 7752
2	1	K2C1_HUMAN	Keratin, type II cytoskeletal 1 OS=Homo sapiens GN=KRT1 PE=1 SV=6	2929	66170	67	62	36	34	7327	1	1	1	978.177	2931.51	3	2931.51	0.0007	1	104.79	2.1e-10	R	FLEQQNQVLQTKWELLQQVDTSTR	T				File4189 Spectrum5508 scans: 8659
2	1	K2C1_HUMAN	Keratin, type II cytoskeletal 1 OS=Homo sapiens GN=KRT1 PE=1 SV=6	2929	66170	67	62	36	34	7329	1	1	1	978.178	2931.51	3	2931.51	0.0036	1	83.39	2.7e-08	R	FLEQQNQVLQTKWELLQQVDTSTR	T				File4189 Spectrum5582 scans: 8741
2	1	K2C1_HUMAN	Keratin, type II cytoskeletal 1 OS=Homo sapiens GN=KRT1 PE=1 SV=6	2929	66170	67	62	36	34	8398	1	1	1	895.671	3578.65	4	3578.66	-0.0032	1	38.41	0.00066	R	TLLEGEESRMSGECAPNVSVSVSTSHTTISGGGSR	G				File4189 Spectrum3165 scans: 5898
2	1	K2C1_HUMAN	Keratin, type II cytoskeletal 1 OS=Homo sapiens GN=KRT1 PE=1 SV=6	2929	66170	67	62	36	34	8425	1	1	1	899.671	3594.66	4	3594.65	0.0023	1	47.49	8.5e-05	R	TLLEGEESRMSGECAPNVSVSVSTSHTTISGGGSR	G	Oxidation (M)	0.00000000010000000000000000000000000.0		File4189 Spectrum2719 scans: 5301
2	2	K22E_HUMAN	Keratin, type II cytoskeletal 2 epidermal OS=Homo sapiens GN=KRT2 PE=1 SV=2	2011	65678	43	38	26	23	676	1	0	1	416.25	830.486	2	830.486	-0.0002	0	48.37	0.00016	R	SLVGLGGTK	S				File4189 Spectrum1786 scans: 4074
2	2	K22E_HUMAN	Keratin, type II cytoskeletal 2 epidermal OS=Homo sapiens GN=KRT2 PE=1 SV=2	2011	65678	43	38	26	23	1760	1	0	1	519.267	1036.52	2	1036.52	-0.0003	0	14.66	0.042	R	YLDGLTAER	T				File4189 Spectrum2248 scans: 4687
2	2	K22E_HUMAN	Keratin, type II cytoskeletal 2 epidermal OS=Homo sapiens GN=KRT2 PE=1 SV=2	2011	65678	43	38	26	23	2084	1	0	0	554.275	1106.53	2	1106.54	-0.0008	0	41.96	0.00045	K	AQYEEIAQR	S				File4189 Spectrum874 scans: 2941
2	2	K22E_HUMAN	Keratin, type II cytoskeletal 2 epidermal OS=Homo sapiens GN=KRT2 PE=1 SV=2	2011	65678	43	38	26	23	2085	1	0	0	554.275	1106.54	2	1106.54	-0.0004	0	32.83	0.002	K	AQYEEIAQR	S				File4189 Spectrum943 scans: 3022
2	2	K22E_HUMAN	Keratin, type II cytoskeletal 2 epidermal OS=Homo sapiens GN=KRT2 PE=1 SV=2	2011	65678	43	38	26	23	2403	2	0	1	389.544	1165.61	3	1165.6	0.0115	2	2.63	1.6	K	KKYEDEINK	R				File4189 Spectrum734 scans: 2766
2	2	K22E_HUMAN	Keratin, type II cytoskeletal 2 epidermal OS=Homo sapiens GN=KRT2 PE=1 SV=2	2011	65678	43	38	26	23	2785	1	0	1	627.807	1253.6	2	1253.6	0	0	77.72	5.2e-08	R	GFSSGSAVVSGGSR	R				File4189 Spectrum1068 scans: 3172
2	2	K22E_HUMAN	Keratin, type II cytoskeletal 2 epidermal OS=Homo sapiens GN=KRT2 PE=1 SV=2	2011	65678	43	38	26	23	2939	1	0	1	644.309	1286.6	2	1286.6	0.0005	1	20.55	0.012	R	RSTSSFSCLSR	H				File4189 Spectrum970 scans: 3055
2	2	K22E_HUMAN	Keratin, type II cytoskeletal 2 epidermal OS=Homo sapiens GN=KRT2 PE=1 SV=2	2011	65678	43	38	26	23	2940	1	0	1	429.875	1286.6	3	1286.6	0.0006	1	50.72	1.8e-05	R	RSTSSFSCLSR	H				File4189 Spectrum971 scans: 3056
2	2	K22E_HUMAN	Keratin, type II cytoskeletal 2 epidermal OS=Homo sapiens GN=KRT2 PE=1 SV=2	2011	65678	43	38	26	23	3051	1	0	1	660.795	1319.57	2	1319.58	-0.0008	0	103.07	1.2e-10	R	HGGGGGGFGGGGFGSR	S				File4189 Spectrum1049 scans: 3146
2	2	K22E_HUMAN	Keratin, type II cytoskeletal 2 epidermal OS=Homo sapiens GN=KRT2 PE=1 SV=2	2011	65678	43	38	26	23	3082	1	0	0	665.367	1328.72	2	1328.72	0.0016	0	76.45	2.5e-07	R	NLDLDSIIAEVK	A				File4189 Spectrum6292 scans: 9555
2	2	K22E_HUMAN	Keratin, type II cytoskeletal 2 epidermal OS=Homo sapiens GN=KRT2 PE=1 SV=2	2011	65678	43	38	26	23	3470	1	0	0	738.396	1474.78	2	1474.78	-0.0001	0	68.95	1.6e-06	R	FLEQQNQVLQTK	W				File4189 Spectrum2209 scans: 4637
2	2	K22E_HUMAN	Keratin, type II cytoskeletal 2 epidermal OS=Homo sapiens GN=KRT2 PE=1 SV=2	2011	65678	43	38	26	23	4172	1	0	1	870.859	1739.7	2	1739.7	0.0048	0	105.17	3e-11	R	GSSSGGGYSSGSSSYGSGGR	Q				File4189 Spectrum186 scans: 2083
2	2	K22E_HUMAN	Keratin, type II cytoskeletal 2 epidermal OS=Homo sapiens GN=KRT2 PE=1 SV=2	2011	65678	43	38	26	23	4177	1	0	1	871.378	1740.74	2	1740.74	-0.0008	0	132.3	1.1e-13	R	GGSGGGGSISGGGYGSGGGSGGR	Y				File4189 Spectrum271 scans: 2192
2	2	K22E_HUMAN	Keratin, type II cytoskeletal 2 epidermal OS=Homo sapiens GN=KRT2 PE=1 SV=2	2011	65678	43	38	26	23	4178	1	0	1	871.378	1740.74	2	1740.74	0.0009	0	99.97	1.9e-10	R	GGSGGGGSISGGGYGSGGGSGGR	Y				File4189 Spectrum332 scans: 2262
2	2	K22E_HUMAN	Keratin, type II cytoskeletal 2 epidermal OS=Homo sapiens GN=KRT2 PE=1 SV=2	2011	65678	43	38	26	23	4179	1	0	1	871.379	1740.74	2	1740.74	0.0012	0	4.95	0.61	R	GGSGGGGSISGGGYGSGGGSGGR	Y				File4189 Spectrum388 scans: 2335
2	2	K22E_HUMAN	Keratin, type II cytoskeletal 2 epidermal OS=Homo sapiens GN=KRT2 PE=1 SV=2	2011	65678	43	38	26	23	4508	1	0	1	919.96	1837.91	2	1837.91	-0.0015	0	114.09	2e-11	K	SISISVAGGGGGFGAAGGFGGR	G				File4189 Spectrum4235 scans: 7207
2	2	K22E_HUMAN	Keratin, type II cytoskeletal 2 epidermal OS=Homo sapiens GN=KRT2 PE=1 SV=2	2011	65678	43	38	26	23	4509	1	0	1	919.961	1837.91	2	1837.91	-0.0001	0	76.97	6.1e-08	K	SISISVAGGGGGFGAAGGFGGR	G				File4189 Spectrum4295 scans: 7280
2	2	K22E_HUMAN	Keratin, type II cytoskeletal 2 epidermal OS=Homo sapiens GN=KRT2 PE=1 SV=2	2011	65678	43	38	26	23	4510	1	0	1	919.961	1837.91	2	1837.91	0.0007	0	76.74	6.4e-08	K	SISISVAGGGGGFGAAGGFGGR	G				File4189 Spectrum4381 scans: 7381
2	2	K22E_HUMAN	Keratin, type II cytoskeletal 2 epidermal OS=Homo sapiens GN=KRT2 PE=1 SV=2	2011	65678	43	38	26	23	4672	1	0	1	630.957	1889.85	3	1889.85	-0.0002	1	76.12	9.8e-08	R	YGSGGGSKGGSISGGGYGSGGGK	H				File4189 Spectrum245 scans: 2162
2	2	K22E_HUMAN	Keratin, type II cytoskeletal 2 epidermal OS=Homo sapiens GN=KRT2 PE=1 SV=2	2011	65678	43	38	26	23	4696	1	0	1	950.456	1898.9	2	1898.9	-0.0003	1	22.24	0.0082	R	GGGGGGFRGFSSGSAVVSGGSR	R				File4189 Spectrum2226 scans: 4659
2	2	K22E_HUMAN	Keratin, type II cytoskeletal 2 epidermal OS=Homo sapiens GN=KRT2 PE=1 SV=2	2011	65678	43	38	26	23	5472	1	0	1	733.385	2197.13	3	2197.13	-0.0001	2	61.32	1.8e-06	R	NKLNDLEEALQQAKEDLAR	L				File4189 Spectrum5979 scans: 9195
2	2	K22E_HUMAN	Keratin, type II cytoskeletal 2 epidermal OS=Homo sapiens GN=KRT2 PE=1 SV=2	2011	65678	43	38	26	23	5637	1	0	1	753.003	2255.99	3	2255.99	0	1	64.4	1.1e-06	R	QSGSRGGSGGGGSISGGGYGSGGGSGGR	Y				File4189 Spectrum154 scans: 2048
2	2	K22E_HUMAN	Keratin, type II cytoskeletal 2 epidermal OS=Homo sapiens GN=KRT2 PE=1 SV=2	2011	65678	43	38	26	23	5828	1	0	1	577.541	2306.14	4	2306.14	-0.0001	2	7.33	0.21	K	NVQDAIADAEQRGEHALKDAR	N				File4189 Spectrum4020 scans: 6959
2	2	K22E_HUMAN	Keratin, type II cytoskeletal 2 epidermal OS=Homo sapiens GN=KRT2 PE=1 SV=2	2011	65678	43	38	26	23	6080	1	0	1	1200.01	2398.01	2	2398.01	-0.0009	0	181.78	7.3e-19	R	GGGFGGGSSFGGGSGFSGGGFGGGGFGGGR	F				File4189 Spectrum4358 scans: 7354
2	2	K22E_HUMAN	Keratin, type II cytoskeletal 2 epidermal OS=Homo sapiens GN=KRT2 PE=1 SV=2	2011	65678	43	38	26	23	6081	1	0	1	800.344	2398.01	3	2398.01	-0.0009	0	29	0.0014	R	GGGFGGGSSFGGGSGFSGGGFGGGGFGGGR	F				File4189 Spectrum4376 scans: 7376
2	2	K22E_HUMAN	Keratin, type II cytoskeletal 2 epidermal OS=Homo sapiens GN=KRT2 PE=1 SV=2	2011	65678	43	38	26	23	6140	1	0	0	1209.63	2417.24	2	2417.24	-0.0039	1	82.26	2.3e-08	R	NLDLDSIIAEVKAQYEEIAQR	S				File4189 Spectrum8349 scans: 11922
2	2	K22E_HUMAN	Keratin, type II cytoskeletal 2 epidermal OS=Homo sapiens GN=KRT2 PE=1 SV=2	2011	65678	43	38	26	23	6141	1	0	0	1209.63	2417.24	2	2417.24	-0.002	1	51.06	1.6e-05	R	NLDLDSIIAEVKAQYEEIAQR	S				File4189 Spectrum8422 scans: 12005
2	2	K22E_HUMAN	Keratin, type II cytoskeletal 2 epidermal OS=Homo sapiens GN=KRT2 PE=1 SV=2	2011	65678	43	38	26	23	6142	1	0	0	605.318	2417.24	4	2417.24	0.0003	1	9.64	0.12	R	NLDLDSIIAEVKAQYEEIAQR	S				File4189 Spectrum8373 scans: 11949
2	2	K22E_HUMAN	Keratin, type II cytoskeletal 2 epidermal OS=Homo sapiens GN=KRT2 PE=1 SV=2	2011	65678	43	38	26	23	6143	1	0	0	806.755	2417.24	3	2417.24	0.0009	1	62.96	1.2e-06	R	NLDLDSIIAEVKAQYEEIAQR	S				File4189 Spectrum8338 scans: 11910
2	2	K22E_HUMAN	Keratin, type II cytoskeletal 2 epidermal OS=Homo sapiens GN=KRT2 PE=1 SV=2	2011	65678	43	38	26	23	6144	1	0	0	806.756	2417.24	3	2417.24	0.0013	1	72.52	1.6e-07	R	NLDLDSIIAEVKAQYEEIAQR	S				File4189 Spectrum8411 scans: 11993
2	2	K22E_HUMAN	Keratin, type II cytoskeletal 2 epidermal OS=Homo sapiens GN=KRT2 PE=1 SV=2	2011	65678	43	38	26	23	6191	1	0	1	812.357	2434.05	3	2434.05	0.0003	1	35.86	0.0006	R	GGSGGGGSISGGGYGSGGGSGGRYGSGGGSK	G				File4189 Spectrum391 scans: 2339
2	2	K22E_HUMAN	Keratin, type II cytoskeletal 2 epidermal OS=Homo sapiens GN=KRT2 PE=1 SV=2	2011	65678	43	38	26	23	6246	1	0	1	1229.6	2457.19	2	2457.19	-0.0014	0	105.57	1.3e-10	R	MSGDLSSNVTVSVTSSTISSNVASK	A				File4189 Spectrum3687 scans: 6556
2	2	K22E_HUMAN	Keratin, type II cytoskeletal 2 epidermal OS=Homo sapiens GN=KRT2 PE=1 SV=2	2011	65678	43	38	26	23	6247	1	0	1	1229.6	2457.19	2	2457.19	0.0015	0	68.15	4.8e-07	R	MSGDLSSNVTVSVTSSTISSNVASK	A				File4189 Spectrum3735 scans: 6616
2	2	K22E_HUMAN	Keratin, type II cytoskeletal 2 epidermal OS=Homo sapiens GN=KRT2 PE=1 SV=2	2011	65678	43	38	26	23	6248	1	0	1	820.071	2457.19	3	2457.19	0.0016	0	41.72	0.00012	R	MSGDLSSNVTVSVTSSTISSNVASK	A				File4189 Spectrum3640 scans: 6494
2	2	K22E_HUMAN	Keratin, type II cytoskeletal 2 epidermal OS=Homo sapiens GN=KRT2 PE=1 SV=2	2011	65678	43	38	26	23	6249	1	0	1	1229.6	2457.19	2	2457.19	0.0027	0	110.82	4.1e-11	R	MSGDLSSNVTVSVTSSTISSNVASK	A				File4189 Spectrum3637 scans: 6489
2	2	K22E_HUMAN	Keratin, type II cytoskeletal 2 epidermal OS=Homo sapiens GN=KRT2 PE=1 SV=2	2011	65678	43	38	26	23	6348	1	0	1	834.36	2500.06	3	2500.06	-0.0028	1	74.74	5.9e-08	K	AAFGGSGGRGSSSGGGYSSGSSSYGSGGR	Q				File4189 Spectrum677 scans: 2696
2	2	K22E_HUMAN	Keratin, type II cytoskeletal 2 epidermal OS=Homo sapiens GN=KRT2 PE=1 SV=2	2011	65678	43	38	26	23	6349	1	0	1	1251.04	2500.06	2	2500.06	0.0009	1	38.12	0.00028	K	AAFGGSGGRGSSSGGGYSSGSSSYGSGGR	Q				File4189 Spectrum694 scans: 2717
2	2	K22E_HUMAN	Keratin, type II cytoskeletal 2 epidermal OS=Homo sapiens GN=KRT2 PE=1 SV=2	2011	65678	43	38	26	23	6350	1	0	1	834.361	2500.06	3	2500.06	0.0014	1	56.2	4.6e-06	K	AAFGGSGGRGSSSGGGYSSGSSSYGSGGR	Q				File4189 Spectrum740 scans: 2773
2	2	K22E_HUMAN	Keratin, type II cytoskeletal 2 epidermal OS=Homo sapiens GN=KRT2 PE=1 SV=2	2011	65678	43	38	26	23	6520	1	0	1	856.097	2565.27	3	2565.27	-0.0028	2	77.42	9e-08	R	SKEEAEALYHSKYEELQVTVGR	H				File4189 Spectrum2977 scans: 5640
2	2	K22E_HUMAN	Keratin, type II cytoskeletal 2 epidermal OS=Homo sapiens GN=KRT2 PE=1 SV=2	2011	65678	43	38	26	23	6521	1	0	1	642.325	2565.27	4	2565.27	0.0004	2	61.67	1.6e-06	R	SKEEAEALYHSKYEELQVTVGR	H				File4189 Spectrum2981 scans: 5645
2	2	K22E_HUMAN	Keratin, type II cytoskeletal 2 epidermal OS=Homo sapiens GN=KRT2 PE=1 SV=2	2011	65678	43	38	26	23	6716	1	0	1	884.468	2650.38	3	2650.38	-0.0007	1	90.51	3.3e-09	R	SLVGLGGTKSISISVAGGGGGFGAAGGFGGR	G				File4189 Spectrum5086 scans: 8189
2	2	K22E_HUMAN	Keratin, type II cytoskeletal 2 epidermal OS=Homo sapiens GN=KRT2 PE=1 SV=2	2011	65678	43	38	26	23	7461	1	0	1	754.835	3015.31	4	3015.31	0.0051	2	9.02	0.24	K	AAFGGSGGRGSSSGGGYSSGSSSYGSGGRQSGSR	G				File4189 Spectrum413 scans: 2367
2	2	K22E_HUMAN	Keratin, type II cytoskeletal 2 epidermal OS=Homo sapiens GN=KRT2 PE=1 SV=2	2011	65678	43	38	26	23	7529	1	0	1	1016.84	3047.5	3	3047.49	0.01	0	30.8	0.0021	K	VLYDAEISQIHQSVTDTNVILSMDNSR	N				File4189 Spectrum5804 scans: 8994
2	3	K2C5_HUMAN	Keratin, type II cytoskeletal 5 OS=Homo sapiens GN=KRT5 PE=1 SV=3	445	62568	15	13	11	9	2025	1	0	1	547.802	1093.59	2	1093.59	0.0006	1	24.21	0.0054	R	SLYNLGGSKR	I				File4189 Spectrum1278 scans: 3438
2	3	K2C5_HUMAN	Keratin, type II cytoskeletal 5 OS=Homo sapiens GN=KRT5 PE=1 SV=3	445	62568	15	13	11	9	2107	1	0	1	556.291	1110.57	2	1110.57	-0.0002	0	45.69	5.2e-05	R	ISISTSGGSFR	N				File4189 Spectrum2265 scans: 4708
2	3	K2C5_HUMAN	Keratin, type II cytoskeletal 5 OS=Homo sapiens GN=KRT5 PE=1 SV=3	445	62568	15	13	11	9	3019	1	0	0	436.89	1307.65	3	1307.65	0.0008	2	38.69	0.00028	K	NKYEDEINKR	T				File4189 Spectrum331 scans: 2261
2	3	K2C5_HUMAN	Keratin, type II cytoskeletal 5 OS=Homo sapiens GN=KRT5 PE=1 SV=3	445	62568	15	13	11	9	3082	1	0	0	665.367	1328.72	2	1328.72	0.0016	0	76.45	2.5e-07	R	NLDLDSIIAEVK	A				File4189 Spectrum6292 scans: 9555
2	3	K2C5_HUMAN	Keratin, type II cytoskeletal 5 OS=Homo sapiens GN=KRT5 PE=1 SV=3	445	62568	15	13	11	9	3378	1	0	1	720.36	1438.7	2	1438.71	-0.0006	0	59.44	2.7e-06	R	GLGVGFGSGGGSSSSVK	F				File4189 Spectrum2297 scans: 4752
2	3	K2C5_HUMAN	Keratin, type II cytoskeletal 5 OS=Homo sapiens GN=KRT5 PE=1 SV=3	445	62568	15	13	11	9	4227	1	0	0	587.325	1758.95	3	1758.95	0.0014	1	22.6	0.0076	K	VLDTKWTLLQEQGTK	T				File4189 Spectrum3647 scans: 6503
2	3	K2C5_HUMAN	Keratin, type II cytoskeletal 5 OS=Homo sapiens GN=KRT5 PE=1 SV=3	445	62568	15	13	11	9	5059	1	0	0	683.029	2046.07	3	2046.06	0.0015	1	0.18	0.96	R	QNLEPLFEQYINNLRR	Q				File4189 Spectrum6426 scans: 9712
2	3	K2C5_HUMAN	Keratin, type II cytoskeletal 5 OS=Homo sapiens GN=KRT5 PE=1 SV=3	445	62568	15	13	11	9	6094	1	0	1	1202.62	2403.23	2	2403.23	0.0012	1	83.49	1.5e-08	R	NLDLDSIIAEVKAQYEEIANR	S				File4189 Spectrum8437 scans: 12023
2	3	K2C5_HUMAN	Keratin, type II cytoskeletal 5 OS=Homo sapiens GN=KRT5 PE=1 SV=3	445	62568	15	13	11	9	6095	1	0	1	802.084	2403.23	3	2403.23	0.0016	1	55.62	6.1e-06	R	NLDLDSIIAEVKAQYEEIANR	S				File4189 Spectrum8460 scans: 12050
2	3	K2C5_HUMAN	Keratin, type II cytoskeletal 5 OS=Homo sapiens GN=KRT5 PE=1 SV=3	445	62568	15	13	11	9	6096	1	0	1	802.084	2403.23	3	2403.23	0.0026	1	52.79	1.1e-05	R	NLDLDSIIAEVKAQYEEIANR	S				File4189 Spectrum8397 scans: 11977
2	3	K2C5_HUMAN	Keratin, type II cytoskeletal 5 OS=Homo sapiens GN=KRT5 PE=1 SV=3	445	62568	15	13	11	9	6136	1	0	1	1209.56	2417.11	2	2417.11	-0.0033	1	28.76	0.0058	R	TEAESWYQTKYEELQQTAGR	H				File4189 Spectrum3714 scans: 6591
2	3	K2C5_HUMAN	Keratin, type II cytoskeletal 5 OS=Homo sapiens GN=KRT5 PE=1 SV=3	445	62568	15	13	11	9	6137	1	0	1	806.712	2417.11	3	2417.11	0.0002	1	53.31	2.2e-05	R	TEAESWYQTKYEELQQTAGR	H				File4189 Spectrum3705 scans: 6580
2	3	K2C5_HUMAN	Keratin, type II cytoskeletal 5 OS=Homo sapiens GN=KRT5 PE=1 SV=3	445	62568	15	13	11	9	6713	1	0	1	662.597	2646.36	4	2646.36	-0.0002	2	6.14	0.27	R	NLDLDSIIAEVKAQYEEIANRSR	T				File4189 Spectrum7971 scans: 11484
2	3	K2C5_HUMAN	Keratin, type II cytoskeletal 5 OS=Homo sapiens GN=KRT5 PE=1 SV=3	445	62568	15	13	11	9	6754	1	0	1	666.068	2660.25	4	2660.25	-0.0016	2	39.61	0.00019	R	SRTEAESWYQTKYEELQQTAGR	H				File4189 Spectrum3408 scans: 6209
2	3	K2C5_HUMAN	Keratin, type II cytoskeletal 5 OS=Homo sapiens GN=KRT5 PE=1 SV=3	445	62568	15	13	11	9	6755	1	0	1	887.756	2660.25	3	2660.25	0	2	65.75	6.8e-07	R	SRTEAESWYQTKYEELQQTAGR	H				File4189 Spectrum3402 scans: 6202
2	4	K2C6C_HUMAN	Keratin, type II cytoskeletal 6C OS=Homo sapiens GN=KRT6C PE=1 SV=3	440	60273	13	11	8	7	2084	1	0	0	554.275	1106.53	2	1106.54	-0.0008	0	41.96	0.00045	K	AQYEEIAQR	S				File4189 Spectrum874 scans: 2941
2	4	K2C6C_HUMAN	Keratin, type II cytoskeletal 6C OS=Homo sapiens GN=KRT6C PE=1 SV=3	440	60273	13	11	8	7	2085	1	0	0	554.275	1106.54	2	1106.54	-0.0004	0	32.83	0.002	K	AQYEEIAQR	S				File4189 Spectrum943 scans: 3022
2	4	K2C6C_HUMAN	Keratin, type II cytoskeletal 6C OS=Homo sapiens GN=KRT6C PE=1 SV=3	440	60273	13	11	8	7	3019	1	0	0	436.89	1307.65	3	1307.65	0.0008	2	38.69	0.00028	K	NKYEDEINKR	T				File4189 Spectrum331 scans: 2261
2	4	K2C6C_HUMAN	Keratin, type II cytoskeletal 6C OS=Homo sapiens GN=KRT6C PE=1 SV=3	440	60273	13	11	8	7	3082	1	0	0	665.367	1328.72	2	1328.72	0.0016	0	76.45	2.5e-07	R	NLDLDSIIAEVK	A				File4189 Spectrum6292 scans: 9555
2	4	K2C6C_HUMAN	Keratin, type II cytoskeletal 6C OS=Homo sapiens GN=KRT6C PE=1 SV=3	440	60273	13	11	8	7	3785	1	0	1	799.885	1597.75	2	1597.75	0.0026	0	88.68	4.8e-09	R	ISIGGGSCAISGGYGSR	A				File4189 Spectrum2489 scans: 5010
2	4	K2C6C_HUMAN	Keratin, type II cytoskeletal 6C OS=Homo sapiens GN=KRT6C PE=1 SV=3	440	60273	13	11	8	7	4227	1	0	0	587.325	1758.95	3	1758.95	0.0014	1	22.6	0.0076	K	VLDTKWTLLQEQGTK	T				File4189 Spectrum3647 scans: 6503
2	4	K2C6C_HUMAN	Keratin, type II cytoskeletal 6C OS=Homo sapiens GN=KRT6C PE=1 SV=3	440	60273	13	11	8	7	5059	1	0	0	683.029	2046.07	3	2046.06	0.0015	1	0.18	0.96	R	QNLEPLFEQYINNLRR	Q				File4189 Spectrum6426 scans: 9712
2	4	K2C6C_HUMAN	Keratin, type II cytoskeletal 6C OS=Homo sapiens GN=KRT6C PE=1 SV=3	440	60273	13	11	8	7	6139	1	0	1	806.743	2417.21	3	2417.2	0.0028	1	45.01	6e-05	R	AIGGGLSSVGGGSSTIKYTTTSSSSR	K				File4189 Spectrum2456 scans: 4956
2	4	K2C6C_HUMAN	Keratin, type II cytoskeletal 6C OS=Homo sapiens GN=KRT6C PE=1 SV=3	440	60273	13	11	8	7	6140	1	0	0	1209.63	2417.24	2	2417.24	-0.0039	1	82.26	2.3e-08	R	NLDLDSIIAEVKAQYEEIAQR	S				File4189 Spectrum8349 scans: 11922
2	4	K2C6C_HUMAN	Keratin, type II cytoskeletal 6C OS=Homo sapiens GN=KRT6C PE=1 SV=3	440	60273	13	11	8	7	6141	1	0	0	1209.63	2417.24	2	2417.24	-0.002	1	51.06	1.6e-05	R	NLDLDSIIAEVKAQYEEIAQR	S				File4189 Spectrum8422 scans: 12005
2	4	K2C6C_HUMAN	Keratin, type II cytoskeletal 6C OS=Homo sapiens GN=KRT6C PE=1 SV=3	440	60273	13	11	8	7	6142	1	0	0	605.318	2417.24	4	2417.24	0.0003	1	9.64	0.12	R	NLDLDSIIAEVKAQYEEIAQR	S				File4189 Spectrum8373 scans: 11949
2	4	K2C6C_HUMAN	Keratin, type II cytoskeletal 6C OS=Homo sapiens GN=KRT6C PE=1 SV=3	440	60273	13	11	8	7	6143	1	0	0	806.755	2417.24	3	2417.24	0.0009	1	62.96	1.2e-06	R	NLDLDSIIAEVKAQYEEIAQR	S				File4189 Spectrum8338 scans: 11910
2	4	K2C6C_HUMAN	Keratin, type II cytoskeletal 6C OS=Homo sapiens GN=KRT6C PE=1 SV=3	440	60273	13	11	8	7	6144	1	0	0	806.756	2417.24	3	2417.24	0.0013	1	72.52	1.6e-07	R	NLDLDSIIAEVKAQYEEIAQR	S				File4189 Spectrum8411 scans: 11993
2	5	K2C8_HUMAN	Keratin, type II cytoskeletal 8 OS=Homo sapiens GN=KRT8 PE=1 SV=7	339	53671	13	11	12	11	846	1	0	1	435.719	869.424	2	869.424	0.0002	0	37.73	0.00029	R	ISSSSFSR	V				File4189 Spectrum617 scans: 2616
2	5	K2C8_HUMAN	Keratin, type II cytoskeletal 8 OS=Homo sapiens GN=KRT8 PE=1 SV=7	339	53671	13	11	12	11	1913	1	0	1	540.26	1078.5	2	1078.5	0.0003	0	18.81	0.017	K	AQYEDIANR	S				File4189 Spectrum863 scans: 2928
2	5	K2C8_HUMAN	Keratin, type II cytoskeletal 8 OS=Homo sapiens GN=KRT8 PE=1 SV=7	339	53671	13	11	12	11	2900	1	0	1	639.359	1276.7	2	1276.7	0.0001	0	65.48	2.6e-06	K	LALDIEIATYR	K				File4189 Spectrum5162 scans: 8274
2	5	K2C8_HUMAN	Keratin, type II cytoskeletal 8 OS=Homo sapiens GN=KRT8 PE=1 SV=7	339	53671	13	11	12	11	3019	1	0	0	436.89	1307.65	3	1307.65	0.0008	2	38.69	0.00028	K	NKYEDEINKR	T				File4189 Spectrum331 scans: 2261
2	5	K2C8_HUMAN	Keratin, type II cytoskeletal 8 OS=Homo sapiens GN=KRT8 PE=1 SV=7	339	53671	13	11	12	11	3052	1	0	1	660.839	1319.66	2	1319.66	0	0	50.67	2.1e-05	R	SLDMDSIIAEVK	A				File4189 Spectrum5531 scans: 8684
2	5	K2C8_HUMAN	Keratin, type II cytoskeletal 8 OS=Homo sapiens GN=KRT8 PE=1 SV=7	339	53671	13	11	12	11	3118	1	0	1	671.378	1340.74	2	1340.74	0.0011	1	19.03	0.02	R	LQAEIEGLKGQR	A				File4189 Spectrum1684 scans: 3947
2	5	K2C8_HUMAN	Keratin, type II cytoskeletal 8 OS=Homo sapiens GN=KRT8 PE=1 SV=7	339	53671	13	11	12	11	3460	1	0	1	737.394	1472.77	2	1472.77	0.0011	1	38.01	0.00062	R	DGKLVSESSDVLPK	-				File4189 Spectrum2180 scans: 4598
2	5	K2C8_HUMAN	Keratin, type II cytoskeletal 8 OS=Homo sapiens GN=KRT8 PE=1 SV=7	339	53671	13	11	12	11	3874	1	0	1	544.964	1631.87	3	1631.87	0.0008	1	23.97	0.0056	K	MLETKWSLLQQQK	T				File4189 Spectrum3546 scans: 6379
2	5	K2C8_HUMAN	Keratin, type II cytoskeletal 8 OS=Homo sapiens GN=KRT8 PE=1 SV=7	339	53671	13	11	12	11	3875	1	0	1	816.943	1631.87	2	1631.87	0.0011	1	5.41	0.31	K	MLETKWSLLQQQK	T				File4189 Spectrum3558 scans: 6392
2	5	K2C8_HUMAN	Keratin, type II cytoskeletal 8 OS=Homo sapiens GN=KRT8 PE=1 SV=7	339	53671	13	11	12	11	4943	1	0	1	668.64	2002.9	3	2002.9	-0.0003	1	15.25	0.14	R	SNMDNMFESYINNLRR	Q				File4189 Spectrum5928 scans: 9138
2	5	K2C8_HUMAN	Keratin, type II cytoskeletal 8 OS=Homo sapiens GN=KRT8 PE=1 SV=7	339	53671	13	11	12	11	6034	1	0	1	794.393	2380.16	3	2380.16	-0.0001	1	63.89	1e-06	R	SLDMDSIIAEVKAQYEDIANR	S				File4189 Spectrum7565 scans: 11013
2	5	K2C8_HUMAN	Keratin, type II cytoskeletal 8 OS=Homo sapiens GN=KRT8 PE=1 SV=7	339	53671	13	11	12	11	8679	1	0	1	1242.58	3724.71	3	3724.71	-0.0018	0	78.47	5.8e-08	K	TTSGYAGGLSSAYGGLTSPGLSYSLGSSFGSGAGSSSFSR	T				File4189 Spectrum5982 scans: 9198
2	5	K2C8_HUMAN	Keratin, type II cytoskeletal 8 OS=Homo sapiens GN=KRT8 PE=1 SV=7	339	53671	13	11	12	11	8924	1	0	1	1309.03	3924.06	3	3924.04	0.019	0	70.77	3.3e-07	R	GGLGGGYGGASGMGGITAVTVNQSLLSPLVLEVDPNIQAVR	T				File4189 Spectrum7731 scans: 11211
2		K2C6B_HUMAN	Keratin, type II cytoskeletal 6B OS=Homo sapiens GN=KRT6B PE=1 SV=5	458	60315	13	11	8	7	2084	1	0	0	554.275	1106.53	2	1106.54	-0.0008	0	41.96	0.00045	K	AQYEEIAQR	S				File4189 Spectrum874 scans: 2941
2		K2C6B_HUMAN	Keratin, type II cytoskeletal 6B OS=Homo sapiens GN=KRT6B PE=1 SV=5	458	60315	13	11	8	7	2085	1	0	0	554.275	1106.54	2	1106.54	-0.0004	0	32.83	0.002	K	AQYEEIAQR	S				File4189 Spectrum943 scans: 3022
2		K2C6B_HUMAN	Keratin, type II cytoskeletal 6B OS=Homo sapiens GN=KRT6B PE=1 SV=5	458	60315	13	11	8	7	2468	1	0	1	590.304	1178.59	2	1178.59	0.0002	0	69.62	1.3e-06	K	YEELQITAGR	H				File4189 Spectrum2322 scans: 4782
2		K2C6B_HUMAN	Keratin, type II cytoskeletal 6B OS=Homo sapiens GN=KRT6B PE=1 SV=5	458	60315	13	11	8	7	3019	1	0	0	436.89	1307.65	3	1307.65	0.0008	2	38.69	0.00028	K	NKYEDEINKR	T				File4189 Spectrum331 scans: 2261
2		K2C6B_HUMAN	Keratin, type II cytoskeletal 6B OS=Homo sapiens GN=KRT6B PE=1 SV=5	458	60315	13	11	8	7	3082	1	0	0	665.367	1328.72	2	1328.72	0.0016	0	76.45	2.5e-07	R	NLDLDSIIAEVK	A				File4189 Spectrum6292 scans: 9555
2		K2C6B_HUMAN	Keratin, type II cytoskeletal 6B OS=Homo sapiens GN=KRT6B PE=1 SV=5	458	60315	13	11	8	7	3785	1	0	1	799.885	1597.75	2	1597.75	0.0026	0	88.68	4.8e-09	R	ISIGGGSCAISGGYGSR	A				File4189 Spectrum2489 scans: 5010
2		K2C6B_HUMAN	Keratin, type II cytoskeletal 6B OS=Homo sapiens GN=KRT6B PE=1 SV=5	458	60315	13	11	8	7	4227	1	0	0	587.325	1758.95	3	1758.95	0.0014	1	22.6	0.0076	K	VLDTKWTLLQEQGTK	T				File4189 Spectrum3647 scans: 6503
2		K2C6B_HUMAN	Keratin, type II cytoskeletal 6B OS=Homo sapiens GN=KRT6B PE=1 SV=5	458	60315	13	11	8	7	5059	1	0	0	683.029	2046.07	3	2046.06	0.0015	1	0.18	0.96	R	QNLEPLFEQYINNLRR	Q				File4189 Spectrum6426 scans: 9712
2		K2C6B_HUMAN	Keratin, type II cytoskeletal 6B OS=Homo sapiens GN=KRT6B PE=1 SV=5	458	60315	13	11	8	7	6140	1	0	0	1209.63	2417.24	2	2417.24	-0.0039	1	82.26	2.3e-08	R	NLDLDSIIAEVKAQYEEIAQR	S				File4189 Spectrum8349 scans: 11922
2		K2C6B_HUMAN	Keratin, type II cytoskeletal 6B OS=Homo sapiens GN=KRT6B PE=1 SV=5	458	60315	13	11	8	7	6141	1	0	0	1209.63	2417.24	2	2417.24	-0.002	1	51.06	1.6e-05	R	NLDLDSIIAEVKAQYEEIAQR	S				File4189 Spectrum8422 scans: 12005
2		K2C6B_HUMAN	Keratin, type II cytoskeletal 6B OS=Homo sapiens GN=KRT6B PE=1 SV=5	458	60315	13	11	8	7	6142	1	0	0	605.318	2417.24	4	2417.24	0.0003	1	9.64	0.12	R	NLDLDSIIAEVKAQYEEIAQR	S				File4189 Spectrum8373 scans: 11949
2		K2C6B_HUMAN	Keratin, type II cytoskeletal 6B OS=Homo sapiens GN=KRT6B PE=1 SV=5	458	60315	13	11	8	7	6143	1	0	0	806.755	2417.24	3	2417.24	0.0009	1	62.96	1.2e-06	R	NLDLDSIIAEVKAQYEEIAQR	S				File4189 Spectrum8338 scans: 11910
2		K2C6B_HUMAN	Keratin, type II cytoskeletal 6B OS=Homo sapiens GN=KRT6B PE=1 SV=5	458	60315	13	11	8	7	6144	1	0	0	806.756	2417.24	3	2417.24	0.0013	1	72.52	1.6e-07	R	NLDLDSIIAEVKAQYEEIAQR	S				File4189 Spectrum8411 scans: 11993
2		K2C6A_HUMAN	Keratin, type II cytoskeletal 6A OS=Homo sapiens GN=KRT6A PE=1 SV=3	432	60293	12	10	7	6	2084	1	0	0	554.275	1106.53	2	1106.54	-0.0008	0	41.96	0.00045	K	AQYEEIAQR	S				File4189 Spectrum874 scans: 2941
2		K2C6A_HUMAN	Keratin, type II cytoskeletal 6A OS=Homo sapiens GN=KRT6A PE=1 SV=3	432	60293	12	10	7	6	2085	1	0	0	554.275	1106.54	2	1106.54	-0.0004	0	32.83	0.002	K	AQYEEIAQR	S				File4189 Spectrum943 scans: 3022
2		K2C6A_HUMAN	Keratin, type II cytoskeletal 6A OS=Homo sapiens GN=KRT6A PE=1 SV=3	432	60293	12	10	7	6	3019	1	0	0	436.89	1307.65	3	1307.65	0.0008	2	38.69	0.00028	K	NKYEDEINKR	T				File4189 Spectrum331 scans: 2261
2		K2C6A_HUMAN	Keratin, type II cytoskeletal 6A OS=Homo sapiens GN=KRT6A PE=1 SV=3	432	60293	12	10	7	6	3082	1	0	0	665.367	1328.72	2	1328.72	0.0016	0	76.45	2.5e-07	R	NLDLDSIIAEVK	A				File4189 Spectrum6292 scans: 9555
2		K2C6A_HUMAN	Keratin, type II cytoskeletal 6A OS=Homo sapiens GN=KRT6A PE=1 SV=3	432	60293	12	10	7	6	3785	1	0	1	799.885	1597.75	2	1597.75	0.0026	0	88.68	4.8e-09	R	ISIGGGSCAISGGYGSR	A				File4189 Spectrum2489 scans: 5010
2		K2C6A_HUMAN	Keratin, type II cytoskeletal 6A OS=Homo sapiens GN=KRT6A PE=1 SV=3	432	60293	12	10	7	6	5059	1	0	0	683.029	2046.07	3	2046.06	0.0015	1	0.18	0.96	R	QNLEPLFEQYINNLRR	Q				File4189 Spectrum6426 scans: 9712
2		K2C6A_HUMAN	Keratin, type II cytoskeletal 6A OS=Homo sapiens GN=KRT6A PE=1 SV=3	432	60293	12	10	7	6	6139	1	0	1	806.743	2417.21	3	2417.2	0.0028	1	45.01	6e-05	R	AIGGGLSSVGGGSSTIKYTTTSSSSR	K				File4189 Spectrum2456 scans: 4956
2		K2C6A_HUMAN	Keratin, type II cytoskeletal 6A OS=Homo sapiens GN=KRT6A PE=1 SV=3	432	60293	12	10	7	6	6140	1	0	0	1209.63	2417.24	2	2417.24	-0.0039	1	82.26	2.3e-08	R	NLDLDSIIAEVKAQYEEIAQR	S				File4189 Spectrum8349 scans: 11922
2		K2C6A_HUMAN	Keratin, type II cytoskeletal 6A OS=Homo sapiens GN=KRT6A PE=1 SV=3	432	60293	12	10	7	6	6141	1	0	0	1209.63	2417.24	2	2417.24	-0.002	1	51.06	1.6e-05	R	NLDLDSIIAEVKAQYEEIAQR	S				File4189 Spectrum8422 scans: 12005
2		K2C6A_HUMAN	Keratin, type II cytoskeletal 6A OS=Homo sapiens GN=KRT6A PE=1 SV=3	432	60293	12	10	7	6	6142	1	0	0	605.318	2417.24	4	2417.24	0.0003	1	9.64	0.12	R	NLDLDSIIAEVKAQYEEIAQR	S				File4189 Spectrum8373 scans: 11949
2		K2C6A_HUMAN	Keratin, type II cytoskeletal 6A OS=Homo sapiens GN=KRT6A PE=1 SV=3	432	60293	12	10	7	6	6143	1	0	0	806.755	2417.24	3	2417.24	0.0009	1	62.96	1.2e-06	R	NLDLDSIIAEVKAQYEEIAQR	S				File4189 Spectrum8338 scans: 11910
2		K2C6A_HUMAN	Keratin, type II cytoskeletal 6A OS=Homo sapiens GN=KRT6A PE=1 SV=3	432	60293	12	10	7	6	6144	1	0	0	806.756	2417.24	3	2417.24	0.0013	1	72.52	1.6e-07	R	NLDLDSIIAEVKAQYEEIAQR	S				File4189 Spectrum8411 scans: 11993
2		K2C4_HUMAN	Keratin, type II cytoskeletal 4 OS=Homo sapiens GN=KRT4 PE=1 SV=4	100	57649	3	3	2	2	2084	1	0	0	554.275	1106.53	2	1106.54	-0.0008	0	41.96	0.00045	R	AQYEEIAQR	S				File4189 Spectrum874 scans: 2941
2		K2C4_HUMAN	Keratin, type II cytoskeletal 4 OS=Homo sapiens GN=KRT4 PE=1 SV=4	100	57649	3	3	2	2	2085	1	0	0	554.275	1106.54	2	1106.54	-0.0004	0	32.83	0.002	R	AQYEEIAQR	S				File4189 Spectrum943 scans: 3022
2		K2C4_HUMAN	Keratin, type II cytoskeletal 4 OS=Homo sapiens GN=KRT4 PE=1 SV=4	100	57649	3	3	2	2	2900	1	0	1	639.359	1276.7	2	1276.7	0.0001	0	65.48	2.6e-06	K	LALDIEIATYR	K				File4189 Spectrum5162 scans: 8274
2		K2C75_HUMAN	Keratin, type II cytoskeletal 75 OS=Homo sapiens GN=KRT75 PE=1 SV=2	77	59809	2	2	2	2	1913	1	0	1	540.26	1078.5	2	1078.5	0.0003	0	18.81	0.017	K	AQYEDIANR	S				File4189 Spectrum863 scans: 2928
2		K2C75_HUMAN	Keratin, type II cytoskeletal 75 OS=Homo sapiens GN=KRT75 PE=1 SV=2	77	59809	2	2	2	2	3082	1	0	0	665.367	1328.72	2	1328.72	0.0016	0	76.45	2.5e-07	R	NLDLDSIIAEVK	A				File4189 Spectrum6292 scans: 9555
2		K2C79_HUMAN	Keratin, type II cytoskeletal 79 OS=Homo sapiens GN=KRT79 PE=1 SV=2	76	58085	1	1	1	1	3082	1	0	0	665.367	1328.72	2	1328.72	0.0016	0	76.45	2.5e-07	R	NLDLDSIIAEVK	A				File4189 Spectrum6292 scans: 9555
2		K2C1B_HUMAN	Keratin, type II cytoskeletal 1b OS=Homo sapiens GN=KRT77 PE=1 SV=3	69	62149	1	1	1	1	3470	1	0	0	738.396	1474.78	2	1474.78	-0.0001	0	68.95	1.6e-06	R	FLEQQNQVLQTK	W				File4189 Spectrum2209 scans: 4637
2		GFAP_HUMAN	Glial fibrillary acidic protein OS=Homo sapiens GN=GFAP PE=1 SV=1	65	49907	1	1	1	1	2900	1	0	1	639.359	1276.7	2	1276.7	0.0001	0	65.48	2.6e-06	K	LALDIEIATYR	K				File4189 Spectrum5162 scans: 8274
2		K22O_HUMAN	Keratin, type II cytoskeletal 2 oral OS=Homo sapiens GN=KRT76 PE=1 SV=2	55	66370	3	2	2	1	2084	1	0	0	554.275	1106.53	2	1106.54	-0.0008	0	41.96	0.00045	R	AQYEEIAQR	S				File4189 Spectrum874 scans: 2941
2		K22O_HUMAN	Keratin, type II cytoskeletal 2 oral OS=Homo sapiens GN=KRT76 PE=1 SV=2	55	66370	3	2	2	1	2085	1	0	0	554.275	1106.54	2	1106.54	-0.0004	0	32.83	0.002	R	AQYEEIAQR	S				File4189 Spectrum943 scans: 3022
2		K22O_HUMAN	Keratin, type II cytoskeletal 2 oral OS=Homo sapiens GN=KRT76 PE=1 SV=2	55	66370	3	2	2	1	2403	2	0	1	389.544	1165.61	3	1165.6	0.0115	2	2.63	1.6	K	KKYEDEINK	R				File4189 Spectrum734 scans: 2766
3	1	K1C10_HUMAN	Keratin, type I cytoskeletal 10 OS=Homo sapiens GN=KRT10 PE=1 SV=6	2904	59020	61	59	21	21	2001	1	1	0	545.769	1089.52	2	1089.52	-0.0004	0	30.95	0.0082	K	VTMQNLNDR	L				File4189 Spectrum1040 scans: 3135
3	1	K1C10_HUMAN	Keratin, type I cytoskeletal 10 OS=Homo sapiens GN=KRT10 PE=1 SV=6	2904	59020	61	59	21	21	2400	1	1	1	583.296	1164.58	2	1164.58	0.0005	0	27.6	0.0026	R	LENEIQTYR	S				File4189 Spectrum1511 scans: 3731
3	1	K1C10_HUMAN	Keratin, type I cytoskeletal 10 OS=Homo sapiens GN=KRT10 PE=1 SV=6	2904	59020	61	59	21	21	2830	1	1	1	631.801	1261.59	2	1261.59	-0.0018	0	65.58	8.1e-07	R	SLLEGEGSSGGGGR	G				File4189 Spectrum1027 scans: 3120
3	1	K1C10_HUMAN	Keratin, type I cytoskeletal 10 OS=Homo sapiens GN=KRT10 PE=1 SV=6	2904	59020	61	59	21	21	2990	1	1	1	434.203	1299.59	3	1299.59	0	1	41.17	0.00022	K	NHEEEMKDLR	N				File4189 Spectrum250 scans: 2169
3	1	K1C10_HUMAN	Keratin, type I cytoskeletal 10 OS=Homo sapiens GN=KRT10 PE=1 SV=6	2904	59020	61	59	21	21	3164	1	1	1	453.244	1356.71	3	1356.71	-0.0001	1	19.24	0.018	R	QSVEADINGLRR	V				File4189 Spectrum2133 scans: 4540
3	1	K1C10_HUMAN	Keratin, type I cytoskeletal 10 OS=Homo sapiens GN=KRT10 PE=1 SV=6	2904	59020	61	59	21	21	3165	1	1	1	679.363	1356.71	2	1356.71	0	1	28.33	0.016	R	QSVEADINGLRR	V				File4189 Spectrum2126 scans: 4532
3	1	K1C10_HUMAN	Keratin, type I cytoskeletal 10 OS=Homo sapiens GN=KRT10 PE=1 SV=6	2904	59020	61	59	21	21	3215	1	1	1	691.328	1380.64	2	1380.64	0.0005	0	107.64	1.1e-10	R	ALEESNYELEGK	I				File4189 Spectrum1800 scans: 4095
3	1	K1C10_HUMAN	Keratin, type I cytoskeletal 10 OS=Homo sapiens GN=KRT10 PE=1 SV=6	2904	59020	61	59	21	21	3514	1	1	1	498.583	1492.73	3	1492.73	0.0014	1	29.65	0.0017	R	SQYEQLAEQNRK	D				File4189 Spectrum605 scans: 2601
3	1	K1C10_HUMAN	Keratin, type I cytoskeletal 10 OS=Homo sapiens GN=KRT10 PE=1 SV=6	2904	59020	61	59	21	21	3515	1	1	1	747.372	1492.73	2	1492.73	0.0023	1	70.18	2.6e-07	R	SQYEQLAEQNRK	D				File4189 Spectrum606 scans: 2602
3	1	K1C10_HUMAN	Keratin, type I cytoskeletal 10 OS=Homo sapiens GN=KRT10 PE=1 SV=6	2904	59020	61	59	21	21	3665	1	1	1	775.342	1548.67	2	1548.67	-0.0005	0	50.47	1.8e-05	R	SGGGGGGGGCGGGGGVSSLR	I				File4189 Spectrum623 scans: 2623
3	1	K1C10_HUMAN	Keratin, type I cytoskeletal 10 OS=Homo sapiens GN=KRT10 PE=1 SV=6	2904	59020	61	59	21	21	3666	1	1	1	775.342	1548.67	2	1548.67	0	0	145.3	6e-15	R	SGGGGGGGGCGGGGGVSSLR	I				File4189 Spectrum558 scans: 2545
3	1	K1C10_HUMAN	Keratin, type I cytoskeletal 10 OS=Homo sapiens GN=KRT10 PE=1 SV=6	2904	59020	61	59	21	21	3667	1	1	1	775.343	1548.67	2	1548.67	0.0011	0	130.27	1.9e-13	R	SGGGGGGGGCGGGGGVSSLR	I				File4189 Spectrum502 scans: 2474
3	1	K1C10_HUMAN	Keratin, type I cytoskeletal 10 OS=Homo sapiens GN=KRT10 PE=1 SV=6	2904	59020	61	59	21	21	4071	1	1	1	854.388	1706.76	2	1706.76	-0.0035	0	59.81	4.4e-06	K	GSLGGGFSSGGFSGGSFSR	G				File4189 Spectrum4877 scans: 7949
3	1	K1C10_HUMAN	Keratin, type I cytoskeletal 10 OS=Homo sapiens GN=KRT10 PE=1 SV=6	2904	59020	61	59	21	21	4072	1	1	1	854.389	1706.76	2	1706.76	-0.0007	0	47.9	7.1e-05	K	GSLGGGFSSGGFSGGSFSR	G				File4189 Spectrum4671 scans: 7714
3	1	K1C10_HUMAN	Keratin, type I cytoskeletal 10 OS=Homo sapiens GN=KRT10 PE=1 SV=6	2904	59020	61	59	21	21	4073	1	1	1	854.389	1706.76	2	1706.76	-0.0005	0	41.09	0.00034	K	GSLGGGFSSGGFSGGSFSR	G				File4189 Spectrum5165 scans: 8277
3	1	K1C10_HUMAN	Keratin, type I cytoskeletal 10 OS=Homo sapiens GN=KRT10 PE=1 SV=6	2904	59020	61	59	21	21	4074	1	1	1	854.389	1706.76	2	1706.76	-0.0004	0	100.5	3.9e-10	K	GSLGGGFSSGGFSGGSFSR	G				File4189 Spectrum3573 scans: 6410
3	1	K1C10_HUMAN	Keratin, type I cytoskeletal 10 OS=Homo sapiens GN=KRT10 PE=1 SV=6	2904	59020	61	59	21	21	4075	1	1	1	854.39	1706.76	2	1706.76	-0.0002	0	39.08	0.00054	K	GSLGGGFSSGGFSGGSFSR	G				File4189 Spectrum5497 scans: 8646
3	1	K1C10_HUMAN	Keratin, type I cytoskeletal 10 OS=Homo sapiens GN=KRT10 PE=1 SV=6	2904	59020	61	59	21	21	4076	1	1	1	854.39	1706.76	2	1706.76	-0.0002	0	51.61	3e-05	K	GSLGGGFSSGGFSGGSFSR	G				File4189 Spectrum4289 scans: 7271
3	1	K1C10_HUMAN	Keratin, type I cytoskeletal 10 OS=Homo sapiens GN=KRT10 PE=1 SV=6	2904	59020	61	59	21	21	4077	1	1	1	854.39	1706.76	2	1706.76	-0.0002	0	80.04	4.4e-08	K	GSLGGGFSSGGFSGGSFSR	G				File4189 Spectrum3622 scans: 6471
3	1	K1C10_HUMAN	Keratin, type I cytoskeletal 10 OS=Homo sapiens GN=KRT10 PE=1 SV=6	2904	59020	61	59	21	21	4078	1	1	1	854.39	1706.77	2	1706.76	0.0001	0	44.08	0.00017	K	GSLGGGFSSGGFSGGSFSR	G				File4189 Spectrum5289 scans: 8417
3	1	K1C10_HUMAN	Keratin, type I cytoskeletal 10 OS=Homo sapiens GN=KRT10 PE=1 SV=6	2904	59020	61	59	21	21	4079	1	1	1	854.39	1706.77	2	1706.76	0.0004	0	49.84	4.6e-05	K	GSLGGGFSSGGFSGGSFSR	G				File4189 Spectrum4558 scans: 7580
3	1	K1C10_HUMAN	Keratin, type I cytoskeletal 10 OS=Homo sapiens GN=KRT10 PE=1 SV=6	2904	59020	61	59	21	21	4080	1	1	1	854.391	1706.77	2	1706.76	0.0018	0	104.1	1.8e-10	K	GSLGGGFSSGGFSGGSFSR	G				File4189 Spectrum3528 scans: 6356
3	1	K1C10_HUMAN	Keratin, type I cytoskeletal 10 OS=Homo sapiens GN=KRT10 PE=1 SV=6	2904	59020	61	59	21	21	4081	1	1	1	854.391	1706.77	2	1706.76	0.0033	0	45.52	0.00012	K	GSLGGGFSSGGFSGGSFSR	G				File4189 Spectrum4756 scans: 7810
3	1	K1C10_HUMAN	Keratin, type I cytoskeletal 10 OS=Homo sapiens GN=KRT10 PE=1 SV=6	2904	59020	61	59	21	21	4082	1	1	1	854.391	1706.77	2	1706.76	0.0033	0	50.5	3.8e-05	K	GSLGGGFSSGGFSGGSFSR	G				File4189 Spectrum5035 scans: 8130
3	1	K1C10_HUMAN	Keratin, type I cytoskeletal 10 OS=Homo sapiens GN=KRT10 PE=1 SV=6	2904	59020	61	59	21	21	4360	1	1	1	899.009	1796	2	1796	-0.0002	0	46.65	4.2e-05	R	NVQALEIELQSQLALK	Q				File4189 Spectrum6231 scans: 9484
3	1	K1C10_HUMAN	Keratin, type I cytoskeletal 10 OS=Homo sapiens GN=KRT10 PE=1 SV=6	2904	59020	61	59	21	21	4361	1	1	1	599.675	1796	3	1796	0.0001	0	0.91	0.82	R	NVQALEIELQSQLALK	Q				File4189 Spectrum6240 scans: 9493
3	1	K1C10_HUMAN	Keratin, type I cytoskeletal 10 OS=Homo sapiens GN=KRT10 PE=1 SV=6	2904	59020	61	59	21	21	5068	1	1	1	684.656	2050.95	3	2050.95	0.0013	1	40.89	0.00015	R	SGGGGGGGGCGGGGGVSSLRISSSK	G				File4189 Spectrum1268 scans: 3426
3	1	K1C10_HUMAN	Keratin, type I cytoskeletal 10 OS=Homo sapiens GN=KRT10 PE=1 SV=6	2904	59020	61	59	21	21	5275	1	1	0	712.713	2135.12	3	2135.12	0.0006	2	31.54	0.0011	K	VTMQNLNDRLASYLDKVR	A				File4189 Spectrum4988 scans: 8076
3	1	K1C10_HUMAN	Keratin, type I cytoskeletal 10 OS=Homo sapiens GN=KRT10 PE=1 SV=6	2904	59020	61	59	21	21	5319	1	1	0	538.785	2151.11	4	2151.11	0.0014	2	9.99	0.12	K	VTMQNLNDRLASYLDKVR	A	Oxidation (M)	0.001000000000000000.0		File4189 Spectrum4096 scans: 7047
3	1	K1C10_HUMAN	Keratin, type I cytoskeletal 10 OS=Homo sapiens GN=KRT10 PE=1 SV=6	2904	59020	61	59	21	21	5501	1	1	1	1105.53	2209.04	2	2209.04	-0.003	1	117.73	1.4e-11	R	ISSSKGSLGGGFSSGGFSGGSFSR	G				File4189 Spectrum3096 scans: 5808
3	1	K1C10_HUMAN	Keratin, type I cytoskeletal 10 OS=Homo sapiens GN=KRT10 PE=1 SV=6	2904	59020	61	59	21	21	5502	1	1	1	737.354	2209.04	3	2209.04	-0.0013	1	20.47	0.012	R	ISSSKGSLGGGFSSGGFSGGSFSR	G				File4189 Spectrum3232 scans: 5986
3	1	K1C10_HUMAN	Keratin, type I cytoskeletal 10 OS=Homo sapiens GN=KRT10 PE=1 SV=6	2904	59020	61	59	21	21	5503	1	1	1	737.354	2209.04	3	2209.04	-0.0004	1	83.61	1.4e-08	R	ISSSKGSLGGGFSSGGFSGGSFSR	G				File4189 Spectrum3139 scans: 5866
3	1	K1C10_HUMAN	Keratin, type I cytoskeletal 10 OS=Homo sapiens GN=KRT10 PE=1 SV=6	2904	59020	61	59	21	21	5504	1	1	1	737.354	2209.04	3	2209.04	0.0006	1	81.03	2.5e-08	R	ISSSKGSLGGGFSSGGFSGGSFSR	G				File4189 Spectrum3090 scans: 5800
3	1	K1C10_HUMAN	Keratin, type I cytoskeletal 10 OS=Homo sapiens GN=KRT10 PE=1 SV=6	2904	59020	61	59	21	21	5915	1	1	1	781.665	2341.97	3	2341.98	-0.0033	0	62.81	5.2e-07	R	GSSGGGCFGGSSGGYGGLGGFGGGSFR	G				File4189 Spectrum4166 scans: 7127
3	1	K1C10_HUMAN	Keratin, type I cytoskeletal 10 OS=Homo sapiens GN=KRT10 PE=1 SV=6	2904	59020	61	59	21	21	5916	1	1	1	1172	2341.98	2	2341.98	-0.001	0	58.41	1.4e-06	R	GSSGGGCFGGSSGGYGGLGGFGGGSFR	G				File4189 Spectrum4322 scans: 7310
3	1	K1C10_HUMAN	Keratin, type I cytoskeletal 10 OS=Homo sapiens GN=KRT10 PE=1 SV=6	2904	59020	61	59	21	21	5917	1	1	1	1172	2341.98	2	2341.98	-0.0007	0	115.05	3.1e-12	R	GSSGGGCFGGSSGGYGGLGGFGGGSFR	G				File4189 Spectrum4249 scans: 7225
3	1	K1C10_HUMAN	Keratin, type I cytoskeletal 10 OS=Homo sapiens GN=KRT10 PE=1 SV=6	2904	59020	61	59	21	21	5918	1	1	1	1172	2341.98	2	2341.98	-0.0005	0	149.22	1.2e-15	R	GSSGGGCFGGSSGGYGGLGGFGGGSFR	G				File4189 Spectrum4164 scans: 7125
3	1	K1C10_HUMAN	Keratin, type I cytoskeletal 10 OS=Homo sapiens GN=KRT10 PE=1 SV=6	2904	59020	61	59	21	21	6561	1	1	1	862.073	2583.2	3	2583.2	-0.0016	2	33.64	0.0007	R	SQYEQLAEQNRKDAEAWFNEK	S				File4189 Spectrum3770 scans: 6661
3	1	K1C10_HUMAN	Keratin, type I cytoskeletal 10 OS=Homo sapiens GN=KRT10 PE=1 SV=6	2904	59020	61	59	21	21	6564	1	1	1	862.073	2583.2	3	2583.2	-0.0001	2	27.52	0.0026	R	SQYEQLAEQNRKDAEAWFNEK	S				File4189 Spectrum3721 scans: 6600
3	1	K1C10_HUMAN	Keratin, type I cytoskeletal 10 OS=Homo sapiens GN=KRT10 PE=1 SV=6	2904	59020	61	59	21	21	6565	1	1	1	646.807	2583.2	4	2583.2	0.001	2	19.48	0.015	R	SQYEQLAEQNRKDAEAWFNEK	S				File4189 Spectrum3732 scans: 6613
3	1	K1C10_HUMAN	Keratin, type I cytoskeletal 10 OS=Homo sapiens GN=KRT10 PE=1 SV=6	2904	59020	61	59	21	21	6903	1	1	1	916.145	2745.41	3	2745.41	0.002	0	101.3	4.7e-10	R	YCVQLSQIQAQISALEEQLQQIR	A				File4189 Spectrum8419 scans: 12001
3	1	K1C10_HUMAN	Keratin, type I cytoskeletal 10 OS=Homo sapiens GN=KRT10 PE=1 SV=6	2904	59020	61	59	21	21	7175	1	1	1	958.136	2871.39	3	2871.39	0.0005	0	94.94	1.3e-09	R	NVSTGDVNVEMNAAPGVDLTQLLNNMR	S				File4189 Spectrum7062 scans: 10426
3	1	K1C10_HUMAN	Keratin, type I cytoskeletal 10 OS=Homo sapiens GN=KRT10 PE=1 SV=6	2904	59020	61	59	21	21	7176	1	1	1	1436.7	2871.39	2	2871.39	0.0016	0	137.5	1.3e-13	R	NVSTGDVNVEMNAAPGVDLTQLLNNMR	S				File4189 Spectrum7064 scans: 10428
3	1	K1C10_HUMAN	Keratin, type I cytoskeletal 10 OS=Homo sapiens GN=KRT10 PE=1 SV=6	2904	59020	61	59	21	21	7177	1	1	1	1436.7	2871.39	2	2871.39	0.0018	0	51.81	1.4e-05	R	NVSTGDVNVEMNAAPGVDLTQLLNNMR	S				File4189 Spectrum7118 scans: 10487
3	1	K1C10_HUMAN	Keratin, type I cytoskeletal 10 OS=Homo sapiens GN=KRT10 PE=1 SV=6	2904	59020	61	59	21	21	7227	1	1	1	1444.7	2887.38	2	2887.38	-0.0016	0	124.91	1.9e-12	R	NVSTGDVNVEMNAAPGVDLTQLLNNMR	S	Oxidation (M)	0.000000000010000000000000000.0		File4189 Spectrum6688 scans: 10005
3	1	K1C10_HUMAN	Keratin, type I cytoskeletal 10 OS=Homo sapiens GN=KRT10 PE=1 SV=6	2904	59020	61	59	21	21	7228	1	1	1	963.467	2887.38	3	2887.38	-0.0002	0	85.65	1.3e-08	R	NVSTGDVNVEMNAAPGVDLTQLLNNMR	S	Oxidation (M)	0.000000000010000000000000000.0		File4189 Spectrum6683 scans: 10000
3	1	K1C10_HUMAN	Keratin, type I cytoskeletal 10 OS=Homo sapiens GN=KRT10 PE=1 SV=6	2904	59020	61	59	21	21	7229	1	1	1	1444.7	2887.39	2	2887.38	0.0047	0	81.23	2.4e-08	R	NVSTGDVNVEMNAAPGVDLTQLLNNMR	S	Oxidation (M)	0.000000000000000000000000010.0		File4189 Spectrum6080 scans: 9308
3	1	K1C10_HUMAN	Keratin, type I cytoskeletal 10 OS=Homo sapiens GN=KRT10 PE=1 SV=6	2904	59020	61	59	21	21	7258	1	1	1	968.798	2903.37	3	2903.38	-0.0021	0	79.69	3.4e-08	R	NVSTGDVNVEMNAAPGVDLTQLLNNMR	S	2 Oxidation (M)	0.000000000010000000000000010.0		File4189 Spectrum5450 scans: 8596
3	1	K1C10_HUMAN	Keratin, type I cytoskeletal 10 OS=Homo sapiens GN=KRT10 PE=1 SV=6	2904	59020	61	59	21	21	7259	1	1	1	1452.7	2903.38	2	2903.38	0.002	0	113.19	2.4e-11	R	NVSTGDVNVEMNAAPGVDLTQLLNNMR	S	2 Oxidation (M)	0.000000000010000000000000010.0		File4189 Spectrum5484 scans: 8633
3	1	K1C10_HUMAN	Keratin, type I cytoskeletal 10 OS=Homo sapiens GN=KRT10 PE=1 SV=6	2904	59020	61	59	21	21	7260	1	1	1	968.801	2903.38	3	2903.38	0.005	0	41.61	0.00013	R	NVSTGDVNVEMNAAPGVDLTQLLNNMR	S	2 Oxidation (M)	0.000000000010000000000000010.0		File4189 Spectrum5533 scans: 8686
3	1	K1C10_HUMAN	Keratin, type I cytoskeletal 10 OS=Homo sapiens GN=KRT10 PE=1 SV=6	2904	59020	61	59	21	21	7543	1	1	1	1018.21	3051.62	3	3051.62	-0.001	1	63.41	2.1e-06	K	TIDDLKNQILNLTTDNANILLQIDNAR	L				File4189 Spectrum7599 scans: 11054
3	1	K1C10_HUMAN	Keratin, type I cytoskeletal 10 OS=Homo sapiens GN=KRT10 PE=1 SV=6	2904	59020	61	59	21	21	7544	1	1	1	763.912	3051.62	4	3051.62	0.0003	1	57.11	8.8e-06	K	TIDDLKNQILNLTTDNANILLQIDNAR	L				File4189 Spectrum7572 scans: 11020
3	1	K1C10_HUMAN	Keratin, type I cytoskeletal 10 OS=Homo sapiens GN=KRT10 PE=1 SV=6	2904	59020	61	59	21	21	7545	1	1	1	1018.21	3051.62	3	3051.62	0.0014	1	121.97	2.9e-12	K	TIDDLKNQILNLTTDNANILLQIDNAR	L				File4189 Spectrum7556 scans: 11000
3	1	K1C10_HUMAN	Keratin, type I cytoskeletal 10 OS=Homo sapiens GN=KRT10 PE=1 SV=6	2904	59020	61	59	21	21	7855	1	1	1	809.936	3235.72	4	3235.71	0.0012	2	40.55	0.00033	R	VLDELTLTKADLEMQIESLTEELAYLKK	N				File4189 Spectrum8436 scans: 12022
3	1	K1C10_HUMAN	Keratin, type I cytoskeletal 10 OS=Homo sapiens GN=KRT10 PE=1 SV=6	2904	59020	61	59	21	21	7856	1	1	1	1079.58	3235.72	3	3235.71	0.0014	2	55.38	1.1e-05	R	VLDELTLTKADLEMQIESLTEELAYLKK	N				File4189 Spectrum8440 scans: 12026
3	1	K1C10_HUMAN	Keratin, type I cytoskeletal 10 OS=Homo sapiens GN=KRT10 PE=1 SV=6	2904	59020	61	59	21	21	7883	1	1	1	1084.91	3251.71	3	3251.71	-0.0044	2	21.9	0.0088	R	VLDELTLTKADLEMQIESLTEELAYLKK	N	Oxidation (M)	0.0000000000000100000000000000.0		File4189 Spectrum8301 scans: 11866
3	1	K1C10_HUMAN	Keratin, type I cytoskeletal 10 OS=Homo sapiens GN=KRT10 PE=1 SV=6	2904	59020	61	59	21	21	7884	1	1	1	813.935	3251.71	4	3251.71	0.0004	2	40.67	0.00015	R	VLDELTLTKADLEMQIESLTEELAYLKK	N	Oxidation (M)	0.0000000000000100000000000000.0		File4189 Spectrum8331 scans: 11902
3	1	K1C10_HUMAN	Keratin, type I cytoskeletal 10 OS=Homo sapiens GN=KRT10 PE=1 SV=6	2904	59020	61	59	21	21	7885	1	1	1	813.936	3251.72	4	3251.71	0.0053	2	49.48	2.3e-05	R	VLDELTLTKADLEMQIESLTEELAYLKK	N	Oxidation (M)	0.0000000000000100000000000000.0		File4189 Spectrum8263 scans: 11821
3	1	K1C10_HUMAN	Keratin, type I cytoskeletal 10 OS=Homo sapiens GN=KRT10 PE=1 SV=6	2904	59020	61	59	21	21	8280	1	1	1	877.468	3505.84	4	3505.84	0.0004	2	57.33	4.3e-06	K	YYKTIDDLKNQILNLTTDNANILLQIDNAR	L				File4189 Spectrum7590 scans: 11043
3	1	K1C10_HUMAN	Keratin, type I cytoskeletal 10 OS=Homo sapiens GN=KRT10 PE=1 SV=6	2904	59020	61	59	21	21	8281	1	1	1	1169.62	3505.84	3	3505.84	0.0006	2	122.87	2.9e-12	K	YYKTIDDLKNQILNLTTDNANILLQIDNAR	L				File4189 Spectrum7591 scans: 11044
3	1	K1C10_HUMAN	Keratin, type I cytoskeletal 10 OS=Homo sapiens GN=KRT10 PE=1 SV=6	2904	59020	61	59	21	21	9609	1	1	1	1087.53	4346.11	4	4346.1	0.0038	2	13.93	0.049	R	NVSTGDVNVEMNAAPGVDLTQLLNNMRSQYEQLAEQNRK	D				File4189 Spectrum7578 scans: 11028
3	2	K1C14_HUMAN	Keratin, type I cytoskeletal 14 OS=Homo sapiens GN=KRT14 PE=1 SV=4	359	51872	14	13	10	10	271	1	0	1	373.706	745.397	2	745.397	0.0002	0	34.25	0.005	K	TIEDLR	N				File4189 Spectrum918 scans: 2992
3	2	K1C14_HUMAN	Keratin, type I cytoskeletal 14 OS=Homo sapiens GN=KRT14 PE=1 SV=4	359	51872	14	13	10	10	2001	1	0	0	545.769	1089.52	2	1089.52	-0.0004	0	30.95	0.0082	K	VTMQNLNDR	L				File4189 Spectrum1040 scans: 3135
3	2	K1C14_HUMAN	Keratin, type I cytoskeletal 14 OS=Homo sapiens GN=KRT14 PE=1 SV=4	359	51872	14	13	10	10	2081	1	0	1	553.785	1105.56	2	1105.56	0.0009	0	44.25	0.00014	R	ISSVLAGGSCR	A				File4189 Spectrum1254 scans: 3409
3	2	K1C14_HUMAN	Keratin, type I cytoskeletal 14 OS=Homo sapiens GN=KRT14 PE=1 SV=4	359	51872	14	13	10	10	2902	1	0	1	639.797	1277.58	2	1277.58	0.0004	0	36.61	0.00058	K	GSCGIGGGIGGGSSR	I				File4189 Spectrum831 scans: 2890
3	2	K1C14_HUMAN	Keratin, type I cytoskeletal 14 OS=Homo sapiens GN=KRT14 PE=1 SV=4	359	51872	14	13	10	10	2991	1	0	0	651.333	1300.65	2	1300.65	0.0007	0	37.97	0.0004	R	ALEEANADLEVK	I				File4189 Spectrum2035 scans: 4410
3	2	K1C14_HUMAN	Keratin, type I cytoskeletal 14 OS=Homo sapiens GN=KRT14 PE=1 SV=4	359	51872	14	13	10	10	3320	1	0	1	713.352	1424.69	2	1424.69	-0.0005	0	82.54	1.8e-08	R	APSTYGGGLSVSSSR	F				File4189 Spectrum1583 scans: 3822
3	2	K1C14_HUMAN	Keratin, type I cytoskeletal 14 OS=Homo sapiens GN=KRT14 PE=1 SV=4	359	51872	14	13	10	10	3371	1	0	1	719.854	1437.69	2	1437.69	0.0007	1	15.25	0.037	R	ILNEMRDQYEK	M				File4189 Spectrum1479 scans: 3694
3	2	K1C14_HUMAN	Keratin, type I cytoskeletal 14 OS=Homo sapiens GN=KRT14 PE=1 SV=4	359	51872	14	13	10	10	3409	1	0	1	727.852	1453.69	2	1453.69	0.0017	1	27.08	0.0029	R	ILNEMRDQYEK	M	Oxidation (M)	0.00001000000.0		File4189 Spectrum460 scans: 2425
3	2	K1C14_HUMAN	Keratin, type I cytoskeletal 14 OS=Homo sapiens GN=KRT14 PE=1 SV=4	359	51872	14	13	10	10	5275	1	0	0	712.713	2135.12	3	2135.12	0.0006	2	31.54	0.0011	K	VTMQNLNDRLASYLDKVR	A				File4189 Spectrum4988 scans: 8076
3	2	K1C14_HUMAN	Keratin, type I cytoskeletal 14 OS=Homo sapiens GN=KRT14 PE=1 SV=4	359	51872	14	13	10	10	5319	1	0	0	538.785	2151.11	4	2151.11	0.0014	2	9.99	0.12	K	VTMQNLNDRLASYLDKVR	A	Oxidation (M)	0.001000000000000000.0		File4189 Spectrum4096 scans: 7047
3	2	K1C14_HUMAN	Keratin, type I cytoskeletal 14 OS=Homo sapiens GN=KRT14 PE=1 SV=4	359	51872	14	13	10	10	5662	1	0	1	754.68	2261.02	3	2261.02	0.0006	1	61.51	3.3e-06	R	QFTSSSSMKGSCGIGGGIGGGSSR	I				File4189 Spectrum1811 scans: 4109
3	2	K1C14_HUMAN	Keratin, type I cytoskeletal 14 OS=Homo sapiens GN=KRT14 PE=1 SV=4	359	51872	14	13	10	10	5716	1	0	1	760.011	2277.01	3	2277.01	0.0001	1	61.31	2.9e-06	R	QFTSSSSMKGSCGIGGGIGGGSSR	I	Oxidation (M)	0.000000010000000000000000.0		File4189 Spectrum1261 scans: 3417
3	2	K1C14_HUMAN	Keratin, type I cytoskeletal 14 OS=Homo sapiens GN=KRT14 PE=1 SV=4	359	51872	14	13	10	10	6389	1	0	1	1257.12	2512.22	2	2512.23	-0.012	1	25.9	0.0037	R	ISSVLAGGSCRAPSTYGGGLSVSSSR	F				File4189 Spectrum2888 scans: 5519
3	2	K1C14_HUMAN	Keratin, type I cytoskeletal 14 OS=Homo sapiens GN=KRT14 PE=1 SV=4	359	51872	14	13	10	10	6390	1	0	1	838.418	2512.23	3	2512.23	-0.0014	1	77.19	5.8e-08	R	ISSVLAGGSCRAPSTYGGGLSVSSSR	F				File4189 Spectrum2879 scans: 5509
3	3	K1C15_HUMAN	Keratin, type I cytoskeletal 15 OS=Homo sapiens GN=KRT15 PE=1 SV=3	39	49409	2	2	2	2	2991	1	0	0	651.333	1300.65	2	1300.65	0.0007	0	37.97	0.0004	R	ALEEANADLEVK	I				File4189 Spectrum2035 scans: 4410
3	3	K1C15_HUMAN	Keratin, type I cytoskeletal 15 OS=Homo sapiens GN=KRT15 PE=1 SV=3	39	49409	2	2	2	2	4442	1	0	1	911.445	1820.88	2	1820.88	-0.0006	0	16.03	0.031	R	GGSLLAGGGGFGGGSLSGGGGSR	S				File4189 Spectrum3391 scans: 6188
3		K1C16_HUMAN	Keratin, type I cytoskeletal 16 OS=Homo sapiens GN=KRT16 PE=1 SV=4	208	51578	10	8	8	7	271	1	0	1	373.706	745.397	2	745.397	0.0002	0	34.25	0.005	K	TIEDLR	N				File4189 Spectrum918 scans: 2992
3		K1C16_HUMAN	Keratin, type I cytoskeletal 16 OS=Homo sapiens GN=KRT16 PE=1 SV=4	208	51578	10	8	8	7	2001	1	0	0	545.769	1089.52	2	1089.52	-0.0004	0	30.95	0.0082	K	VTMQNLNDR	L				File4189 Spectrum1040 scans: 3135
3		K1C16_HUMAN	Keratin, type I cytoskeletal 16 OS=Homo sapiens GN=KRT16 PE=1 SV=4	208	51578	10	8	8	7	2081	1	0	1	553.785	1105.56	2	1105.56	0.0009	0	44.25	0.00014	R	ISSVLAGGSCR	A				File4189 Spectrum1254 scans: 3409
3		K1C16_HUMAN	Keratin, type I cytoskeletal 16 OS=Homo sapiens GN=KRT16 PE=1 SV=4	208	51578	10	8	8	7	2902	1	0	1	639.797	1277.58	2	1277.58	0.0004	0	36.61	0.00058	K	GSCGIGGGIGGGSSR	I				File4189 Spectrum831 scans: 2890
3		K1C16_HUMAN	Keratin, type I cytoskeletal 16 OS=Homo sapiens GN=KRT16 PE=1 SV=4	208	51578	10	8	8	7	2991	1	0	0	651.333	1300.65	2	1300.65	0.0007	0	37.97	0.0004	R	ALEEANADLEVK	I				File4189 Spectrum2035 scans: 4410
3		K1C16_HUMAN	Keratin, type I cytoskeletal 16 OS=Homo sapiens GN=KRT16 PE=1 SV=4	208	51578	10	8	8	7	3165	8	0	1	679.363	1356.71	2	1356.71	-0.0001	1	0.42	9.7	R	QTVEADVNGLRR	V				File4189 Spectrum2126 scans: 4532
3		K1C16_HUMAN	Keratin, type I cytoskeletal 16 OS=Homo sapiens GN=KRT16 PE=1 SV=4	208	51578	10	8	8	7	5275	1	0	0	712.713	2135.12	3	2135.12	0.0006	2	31.54	0.0011	K	VTMQNLNDRLASYLDKVR	A				File4189 Spectrum4988 scans: 8076
3		K1C16_HUMAN	Keratin, type I cytoskeletal 16 OS=Homo sapiens GN=KRT16 PE=1 SV=4	208	51578	10	8	8	7	5319	1	0	0	538.785	2151.11	4	2151.11	0.0014	2	9.99	0.12	K	VTMQNLNDRLASYLDKVR	A	Oxidation (M)	0.001000000000000000.0		File4189 Spectrum4096 scans: 7047
3		K1C16_HUMAN	Keratin, type I cytoskeletal 16 OS=Homo sapiens GN=KRT16 PE=1 SV=4	208	51578	10	8	8	7	5662	1	0	1	754.68	2261.02	3	2261.02	0.0006	1	61.51	3.3e-06	R	QFTSSSSMKGSCGIGGGIGGGSSR	I				File4189 Spectrum1811 scans: 4109
3		K1C16_HUMAN	Keratin, type I cytoskeletal 16 OS=Homo sapiens GN=KRT16 PE=1 SV=4	208	51578	10	8	8	7	5716	1	0	1	760.011	2277.01	3	2277.01	0.0001	1	61.31	2.9e-06	R	QFTSSSSMKGSCGIGGGIGGGSSR	I	Oxidation (M)	0.000000010000000000000000.0		File4189 Spectrum1261 scans: 3417
3		K1C13_HUMAN	Keratin, type I cytoskeletal 13 OS=Homo sapiens GN=KRT13 PE=1 SV=4	50	49900	3	3	2	2	2991	1	0	0	651.333	1300.65	2	1300.65	0.0007	0	37.97	0.0004	R	ALEEANADLEVK	I				File4189 Spectrum2035 scans: 4410
3		K1C13_HUMAN	Keratin, type I cytoskeletal 13 OS=Homo sapiens GN=KRT13 PE=1 SV=4	50	49900	3	3	2	2	3164	1	0	1	453.244	1356.71	3	1356.71	-0.0001	1	19.24	0.018	R	QSVEADINGLRR	V				File4189 Spectrum2133 scans: 4540
3		K1C13_HUMAN	Keratin, type I cytoskeletal 13 OS=Homo sapiens GN=KRT13 PE=1 SV=4	50	49900	3	3	2	2	3165	1	0	1	679.363	1356.71	2	1356.71	0	1	28.33	0.016	R	QSVEADINGLRR	V				File4189 Spectrum2126 scans: 4532
3		DPOLB_HUMAN	DNA polymerase beta OS=Homo sapiens GN=POLB PE=1 SV=3	34	38325	1	1	1	1	271	1	0	1	373.706	745.397	2	745.397	0.0002	0	34.25	0.005	K	TLEDLR	K				File4189 Spectrum918 scans: 2992
3		K1C25_HUMAN	Keratin, type I cytoskeletal 25 OS=Homo sapiens GN=KRT25 PE=1 SV=1	31	49858	1	1	1	1	2001	1	0	0	545.769	1089.52	2	1089.52	-0.0004	0	30.95	0.0082	K	VTMQNLNDR	L				File4189 Spectrum1040 scans: 3135
3		K1C17_HUMAN	Keratin, type I cytoskeletal 17 OS=Homo sapiens GN=KRT17 PE=1 SV=2	29	48361	2	2	1	1	3371	1	0	1	719.854	1437.69	2	1437.69	0.0007	1	15.25	0.037	R	ILNEMRDQYEK	M				File4189 Spectrum1479 scans: 3694
3		K1C17_HUMAN	Keratin, type I cytoskeletal 17 OS=Homo sapiens GN=KRT17 PE=1 SV=2	29	48361	2	2	1	1	3409	1	0	1	727.852	1453.69	2	1453.69	0.0017	1	27.08	0.0029	R	ILNEMRDQYEK	M	Oxidation (M)	0.00001000000.0		File4189 Spectrum460 scans: 2425
4	1	CH60_HUMAN	60 kDa heat shock protein, mitochondrial OS=Homo sapiens GN=HSPD1 PE=1 SV=2	1533	61187	38	33	20	19	982	1	1	1	451.271	900.528	2	900.528	-0.0002	0	50.2	7.1e-05	K	LSDGVAVLK	V				File4189 Spectrum2074 scans: 4463
4	1	CH60_HUMAN	60 kDa heat shock protein, mitochondrial OS=Homo sapiens GN=HSPD1 PE=1 SV=2	1533	61187	38	33	20	19	1306	1	1	1	480.759	959.504	2	959.504	0.0002	0	52.23	6e-05	R	VTDALNATR	A				File4189 Spectrum594 scans: 2588
4	1	CH60_HUMAN	60 kDa heat shock protein, mitochondrial OS=Homo sapiens GN=HSPD1 PE=1 SV=2	1533	61187	38	33	20	19	2613	1	1	1	608.333	1214.65	2	1214.65	0.0004	0	64.66	5e-06	K	NAGVEGSLIVEK	I				File4189 Spectrum2290 scans: 4743
4	1	CH60_HUMAN	60 kDa heat shock protein, mitochondrial OS=Homo sapiens GN=HSPD1 PE=1 SV=2	1533	61187	38	33	20	19	3130	1	1	1	672.861	1343.71	2	1343.71	0	0	45.35	5.6e-05	R	TVIIEQSWGSPK	V				File4189 Spectrum3132 scans: 5857
4	1	CH60_HUMAN	60 kDa heat shock protein, mitochondrial OS=Homo sapiens GN=HSPD1 PE=1 SV=2	1533	61187	38	33	20	19	3131	1	1	1	672.862	1343.71	2	1343.71	0.0008	0	69.18	1.3e-06	R	TVIIEQSWGSPK	V				File4189 Spectrum3084 scans: 5792
4	1	CH60_HUMAN	60 kDa heat shock protein, mitochondrial OS=Homo sapiens GN=HSPD1 PE=1 SV=2	1533	61187	38	33	20	19	3681	1	1	1	778.957	1555.9	2	1555.9	-0.0005	1	50.84	3.9e-05	R	GVMLAVDAVIAELKK	Q				File4189 Spectrum7139 scans: 10512
4	1	CH60_HUMAN	60 kDa heat shock protein, mitochondrial OS=Homo sapiens GN=HSPD1 PE=1 SV=2	1533	61187	38	33	20	19	3872	1	1	1	408.961	1631.81	4	1631.81	0.0019	2	6.53	0.24	K	VGGTSDVEVNEKKDR	V				File4189 Spectrum121 scans: 2012
4	1	CH60_HUMAN	60 kDa heat shock protein, mitochondrial OS=Homo sapiens GN=HSPD1 PE=1 SV=2	1533	61187	38	33	20	19	3990	1	1	1	836.966	1671.92	2	1671.92	-0.0024	1	32.71	0.00086	R	TVIIEQSWGSPKVTK	D				File4189 Spectrum2915 scans: 5555
4	1	CH60_HUMAN	60 kDa heat shock protein, mitochondrial OS=Homo sapiens GN=HSPD1 PE=1 SV=2	1533	61187	38	33	20	19	4012	1	1	1	842.956	1683.9	2	1683.9	-0.0007	0	69.97	1e-06	R	AAVEEGIVLGGGCALLR	C				File4189 Spectrum4826 scans: 7891
4	1	CH60_HUMAN	60 kDa heat shock protein, mitochondrial OS=Homo sapiens GN=HSPD1 PE=1 SV=2	1533	61187	38	33	20	19	4013	1	1	1	562.307	1683.9	3	1683.9	0	0	56.9	4.6e-06	R	AAVEEGIVLGGGCALLR	C				File4189 Spectrum4831 scans: 7897
4	1	CH60_HUMAN	60 kDa heat shock protein, mitochondrial OS=Homo sapiens GN=HSPD1 PE=1 SV=2	1533	61187	38	33	20	19	4014	1	1	1	842.957	1683.9	2	1683.9	0.0011	0	35.33	0.00049	R	AAVEEGIVLGGGCALLR	C				File4189 Spectrum4906 scans: 7982
4	1	CH60_HUMAN	60 kDa heat shock protein, mitochondrial OS=Homo sapiens GN=HSPD1 PE=1 SV=2	1533	61187	38	33	20	19	4137	1	1	1	577.287	1728.84	3	1728.84	0.0003	1	22.83	0.0072	K	CEFQDAYVLLSEKK	I				File4189 Spectrum4121 scans: 7074
4	1	CH60_HUMAN	60 kDa heat shock protein, mitochondrial OS=Homo sapiens GN=HSPD1 PE=1 SV=2	1533	61187	38	33	20	19	5215	1	1	1	1057.07	2112.13	2	2112.13	0.0001	0	113.95	3.2e-11	R	ALMLQGVDLLADAVAVTMGPK	G				File4189 Spectrum9249 scans: 13121
4	1	CH60_HUMAN	60 kDa heat shock protein, mitochondrial OS=Homo sapiens GN=HSPD1 PE=1 SV=2	1533	61187	38	33	20	19	5216	1	1	1	705.052	2112.13	3	2112.13	0.0008	0	102.02	2.7e-10	R	ALMLQGVDLLADAVAVTMGPK	G				File4189 Spectrum9245 scans: 13115
4	1	CH60_HUMAN	60 kDa heat shock protein, mitochondrial OS=Homo sapiens GN=HSPD1 PE=1 SV=2	1533	61187	38	33	20	19	5217	1	1	1	1057.07	2112.13	2	2112.13	0.0014	0	102.87	4e-10	R	ALMLQGVDLLADAVAVTMGPK	G				File4189 Spectrum9294 scans: 13183
4	1	CH60_HUMAN	60 kDa heat shock protein, mitochondrial OS=Homo sapiens GN=HSPD1 PE=1 SV=2	1533	61187	38	33	20	19	5218	1	1	1	705.052	2112.13	3	2112.13	0.0015	0	68.95	3.4e-07	R	ALMLQGVDLLADAVAVTMGPK	G				File4189 Spectrum9197 scans: 13049
4	1	CH60_HUMAN	60 kDa heat shock protein, mitochondrial OS=Homo sapiens GN=HSPD1 PE=1 SV=2	1533	61187	38	33	20	19	5219	1	1	1	705.052	2112.13	3	2112.13	0.0017	0	97.58	7.1e-10	R	ALMLQGVDLLADAVAVTMGPK	G				File4189 Spectrum9292 scans: 13179
4	1	CH60_HUMAN	60 kDa heat shock protein, mitochondrial OS=Homo sapiens GN=HSPD1 PE=1 SV=2	1533	61187	38	33	20	19	5221	1	1	1	1057.07	2112.13	2	2112.13	0.0026	0	115.71	1.4e-11	R	ALMLQGVDLLADAVAVTMGPK	G				File4189 Spectrum9205 scans: 13059
4	1	CH60_HUMAN	60 kDa heat shock protein, mitochondrial OS=Homo sapiens GN=HSPD1 PE=1 SV=2	1533	61187	38	33	20	19	5255	1	1	1	1065.07	2128.13	2	2128.13	0.0008	0	34.69	0.00056	R	ALMLQGVDLLADAVAVTMGPK	G	Oxidation (M)	0.000000000000000001000.0		File4189 Spectrum7870 scans: 11369
4	1	CH60_HUMAN	60 kDa heat shock protein, mitochondrial OS=Homo sapiens GN=HSPD1 PE=1 SV=2	1533	61187	38	33	20	19	5883	1	1	1	776.092	2325.25	3	2325.25	-0.0006	1	72.93	1.5e-07	R	ALMLQGVDLLADAVAVTMGPKGR	T				File4189 Spectrum8484 scans: 12078
4	1	CH60_HUMAN	60 kDa heat shock protein, mitochondrial OS=Homo sapiens GN=HSPD1 PE=1 SV=2	1533	61187	38	33	20	19	5921	1	1	1	586.578	2342.28	4	2342.28	0.0003	2	25.72	0.012	R	TVIIEQSWGSPKVTKDGVTVAK	S				File4189 Spectrum3230 scans: 5984
4	1	CH60_HUMAN	60 kDa heat shock protein, mitochondrial OS=Homo sapiens GN=HSPD1 PE=1 SV=2	1533	61187	38	33	20	19	6377	1	1	1	836.708	2507.1	3	2507.1	0.0018	0	4.31	1.2	K	IMQSSSEVGYDAMAGDFVNMVEK	G				File4189 Spectrum6235 scans: 9488
4	1	CH60_HUMAN	60 kDa heat shock protein, mitochondrial OS=Homo sapiens GN=HSPD1 PE=1 SV=2	1533	61187	38	33	20	19	6378	1	1	1	1254.56	2507.1	2	2507.1	0.0023	0	109.54	3.6e-11	K	IMQSSSEVGYDAMAGDFVNMVEK	G				File4189 Spectrum6228 scans: 9479
4	1	CH60_HUMAN	60 kDa heat shock protein, mitochondrial OS=Homo sapiens GN=HSPD1 PE=1 SV=2	1533	61187	38	33	20	19	6504	1	1	1	854.088	2559.24	3	2559.24	-0.0003	0	85.5	9.6e-09	K	LVQDVANNTNEEAGDGTTTATVLAR	S				File4189 Spectrum2705 scans: 5280
4	1	CH60_HUMAN	60 kDa heat shock protein, mitochondrial OS=Homo sapiens GN=HSPD1 PE=1 SV=2	1533	61187	38	33	20	19	6505	1	1	1	1280.63	2559.24	2	2559.24	-0.0002	0	135.2	2.1e-13	K	LVQDVANNTNEEAGDGTTTATVLAR	S				File4189 Spectrum2664 scans: 5223
4	1	CH60_HUMAN	60 kDa heat shock protein, mitochondrial OS=Homo sapiens GN=HSPD1 PE=1 SV=2	1533	61187	38	33	20	19	6506	1	1	1	854.088	2559.24	3	2559.24	0.0019	0	88.48	5.1e-09	K	LVQDVANNTNEEAGDGTTTATVLAR	S				File4189 Spectrum2654 scans: 5211
4	1	CH60_HUMAN	60 kDa heat shock protein, mitochondrial OS=Homo sapiens GN=HSPD1 PE=1 SV=2	1533	61187	38	33	20	19	6651	1	1	1	876.136	2625.39	3	2625.39	-0.0038	1	64.22	9.5e-07	R	VTDALNATRAAVEEGIVLGGGCALLR	C				File4189 Spectrum6737 scans: 10059
4	1	CH60_HUMAN	60 kDa heat shock protein, mitochondrial OS=Homo sapiens GN=HSPD1 PE=1 SV=2	1533	61187	38	33	20	19	6823	1	1	1	674.368	2693.44	4	2693.44	0.0004	2	44.61	0.00017	R	CIPALDSLTPANEDQKIGIEIIKR	T				File4189 Spectrum4980 scans: 8067
4	1	CH60_HUMAN	60 kDa heat shock protein, mitochondrial OS=Homo sapiens GN=HSPD1 PE=1 SV=2	1533	61187	38	33	20	19	7051	1	1	1	702.613	2806.42	4	2806.42	-0.0018	2	71.83	1.8e-07	R	IQEIIEQLDVTTSEYEKEKLNER	L				File4189 Spectrum4738 scans: 7791
4	1	CH60_HUMAN	60 kDa heat shock protein, mitochondrial OS=Homo sapiens GN=HSPD1 PE=1 SV=2	1533	61187	38	33	20	19	7052	1	1	1	936.482	2806.43	3	2806.42	0.0017	2	71.39	2e-07	R	IQEIIEQLDVTTSEYEKEKLNER	L				File4189 Spectrum4741 scans: 7794
4	1	CH60_HUMAN	60 kDa heat shock protein, mitochondrial OS=Homo sapiens GN=HSPD1 PE=1 SV=2	1533	61187	38	33	20	19	7514	1	1	1	1015.18	3042.52	3	3042.52	0.0006	1	24.42	0.0051	K	NIGAKLVQDVANNTNEEAGDGTTTATVLAR	S				File4189 Spectrum4122 scans: 7075
4	1	CH60_HUMAN	60 kDa heat shock protein, mitochondrial OS=Homo sapiens GN=HSPD1 PE=1 SV=2	1533	61187	38	33	20	19	8404	1	1	1	897.444	3585.75	4	3585.75	-0.0032	2	48.19	3e-05	K	IMQSSSEVGYDAMAGDFVNMVEKGIIDPTKVVR	T				File4189 Spectrum7610 scans: 11070
4	1	CH60_HUMAN	60 kDa heat shock protein, mitochondrial OS=Homo sapiens GN=HSPD1 PE=1 SV=2	1533	61187	38	33	20	19	9749	1	1	1	1508.73	4523.17	3	4523.18	-0.0034	2	13.75	0.19	R	TALLDAAGVASLLTTAEVVVTEIPKEEKDPGMGAMGGMGGGMGGGMF	-				File4189 Spectrum9974 scans: 14436
4	1	CH60_HUMAN	60 kDa heat shock protein, mitochondrial OS=Homo sapiens GN=HSPD1 PE=1 SV=2	1533	61187	38	33	20	19	9750	1	1	1	1131.8	4523.17	4	4523.18	-0.0026	2	30.35	0.0041	R	TALLDAAGVASLLTTAEVVVTEIPKEEKDPGMGAMGGMGGGMGGGMF	-				File4189 Spectrum10011 scans: 14490
4	1	CH60_HUMAN	60 kDa heat shock protein, mitochondrial OS=Homo sapiens GN=HSPD1 PE=1 SV=2	1533	61187	38	33	20	19	9751	1	1	1	1508.73	4523.18	3	4523.18	-0.0001	2	14.74	0.15	R	TALLDAAGVASLLTTAEVVVTEIPKEEKDPGMGAMGGMGGGMGGGMF	-				File4189 Spectrum10016 scans: 14496
4	1	CH60_HUMAN	60 kDa heat shock protein, mitochondrial OS=Homo sapiens GN=HSPD1 PE=1 SV=2	1533	61187	38	33	20	19	9752	1	1	1	1131.8	4523.18	4	4523.18	0.0047	2	31.89	0.003	R	TALLDAAGVASLLTTAEVVVTEIPKEEKDPGMGAMGGMGGGMGGGMF	-				File4189 Spectrum10059 scans: 14557
4	1	CH60_HUMAN	60 kDa heat shock protein, mitochondrial OS=Homo sapiens GN=HSPD1 PE=1 SV=2	1533	61187	38	33	20	19	9753	1	1	1	1131.81	4523.19	4	4523.18	0.0179	2	31.42	0.0027	R	TALLDAAGVASLLTTAEVVVTEIPKEEKDPGMGAMGGMGGGMGGGMF	-				File4189 Spectrum9971 scans: 14432
4	1	CH60_HUMAN	60 kDa heat shock protein, mitochondrial OS=Homo sapiens GN=HSPD1 PE=1 SV=2	1533	61187	38	33	20	19	9769	1	1	1	1135.8	4539.17	4	4539.17	0.0025	2	6.9	0.94	R	TALLDAAGVASLLTTAEVVVTEIPKEEKDPGMGAMGGMGGGMGGGMF	-	Oxidation (M)	0.00000000000000000000000000000000000000000000010.0		File4189 Spectrum9740 scans: 14023
5	1	ACTB_HUMAN	Actin, cytoplasmic 1 OS=Homo sapiens GN=ACTB PE=1 SV=1	1133	42052	29	28	20	19	1423	1	1	0	488.728	975.44	2	975.441	-0.0006	0	52.28	2.1e-05	K	AGFAGDDAPR	A				File4189 Spectrum728 scans: 2759
5	1	ACTB_HUMAN	Actin, cytoplasmic 1 OS=Homo sapiens GN=ACTB PE=1 SV=1	1133	42052	29	28	20	19	1424	1	1	0	488.728	975.441	2	975.441	-0.0003	0	71.59	2.4e-07	K	AGFAGDDAPR	A				File4189 Spectrum666 scans: 2682
5	1	ACTB_HUMAN	Actin, cytoplasmic 1 OS=Homo sapiens GN=ACTB PE=1 SV=1	1133	42052	29	28	20	19	2373	1	1	0	581.313	1160.61	2	1160.61	0.0001	0	40.36	0.0013	K	EITALAPSTMK	I				File4189 Spectrum2438 scans: 4932
5	1	ACTB_HUMAN	Actin, cytoplasmic 1 OS=Homo sapiens GN=ACTB PE=1 SV=1	1133	42052	29	28	20	19	2434	1	1	0	586.289	1170.56	2	1170.56	0.0002	0	77.27	7.9e-08	R	HQGVMVGMGQK	D				File4189 Spectrum773 scans: 2815
5	1	ACTB_HUMAN	Actin, cytoplasmic 1 OS=Homo sapiens GN=ACTB PE=1 SV=1	1133	42052	29	28	20	19	2542	1	1	0	599.765	1197.52	2	1197.52	0.0002	0	39.98	0.00028	K	DSYVGDEAQSK	R				File4189 Spectrum314 scans: 2240
5	1	ACTB_HUMAN	Actin, cytoplasmic 1 OS=Homo sapiens GN=ACTB PE=1 SV=1	1133	42052	29	28	20	19	2548	1	1	0	400.24	1197.7	3	1197.7	0.0001	0	27.81	0.0025	R	AVFPSIVGRPR	H				File4189 Spectrum2938 scans: 5586
5	1	ACTB_HUMAN	Actin, cytoplasmic 1 OS=Homo sapiens GN=ACTB PE=1 SV=1	1133	42052	29	28	20	19	3156	1	1	0	452.212	1353.62	3	1353.62	-0.0003	1	47.88	4.7e-05	K	DSYVGDEAQSKR	G				File4189 Spectrum209 scans: 2112
5	1	ACTB_HUMAN	Actin, cytoplasmic 1 OS=Homo sapiens GN=ACTB PE=1 SV=1	1133	42052	29	28	20	19	3157	1	1	0	677.815	1353.62	2	1353.62	-0.0001	1	59.43	2.7e-06	K	DSYVGDEAQSKR	G				File4189 Spectrum207 scans: 2109
5	1	ACTB_HUMAN	Actin, cytoplasmic 1 OS=Homo sapiens GN=ACTB PE=1 SV=1	1133	42052	29	28	20	19	3265	1	1	0	468.271	1401.79	3	1401.79	0.0001	1	21.74	0.0091	K	EITALAPSTMKIK	I				File4189 Spectrum2929 scans: 5574
5	1	ACTB_HUMAN	Actin, cytoplasmic 1 OS=Homo sapiens GN=ACTB PE=1 SV=1	1133	42052	29	28	20	19	3657	1	1	0	774.909	1547.8	2	1547.81	-0.002	1	45.68	0.00032	R	MQKEITALAPSTMK	I				File4189 Spectrum2383 scans: 4858
5	1	ACTB_HUMAN	Actin, cytoplasmic 1 OS=Homo sapiens GN=ACTB PE=1 SV=1	1133	42052	29	28	20	19	3658	1	1	0	774.91	1547.8	2	1547.81	-0.0004	1	73.73	5e-07	R	MQKEITALAPSTMK	I				File4189 Spectrum2324 scans: 4784
5	1	ACTB_HUMAN	Actin, cytoplasmic 1 OS=Homo sapiens GN=ACTB PE=1 SV=1	1133	42052	29	28	20	19	3659	1	1	0	516.942	1547.81	3	1547.81	0	1	77.35	2.2e-07	R	MQKEITALAPSTMK	I				File4189 Spectrum2335 scans: 4797
5	1	ACTB_HUMAN	Actin, cytoplasmic 1 OS=Homo sapiens GN=ACTB PE=1 SV=1	1133	42052	29	28	20	19	4312	1	1	0	895.95	1789.89	2	1789.88	0.0006	0	80	1.1e-07	K	SYELPDGQVITIGNER	F				File4189 Spectrum4432 scans: 7440
5	1	ACTB_HUMAN	Actin, cytoplasmic 1 OS=Homo sapiens GN=ACTB PE=1 SV=1	1133	42052	29	28	20	19	4839	1	1	1	977.536	1953.06	2	1953.06	-0.0002	0	51.31	4.7e-05	R	VAPEEHPVLLTEAPLNPK	A				File4189 Spectrum3475 scans: 6290
5	1	ACTB_HUMAN	Actin, cytoplasmic 1 OS=Homo sapiens GN=ACTB PE=1 SV=1	1133	42052	29	28	20	19	4840	1	1	1	652.026	1953.06	3	1953.06	0.0002	0	34.36	0.0023	R	VAPEEHPVLLTEAPLNPK	A				File4189 Spectrum3521 scans: 6348
5	1	ACTB_HUMAN	Actin, cytoplasmic 1 OS=Homo sapiens GN=ACTB PE=1 SV=1	1133	42052	29	28	20	19	4841	1	1	1	652.026	1953.06	3	1953.06	0.0004	0	45.83	0.00016	R	VAPEEHPVLLTEAPLNPK	A				File4189 Spectrum3472 scans: 6287
5	1	ACTB_HUMAN	Actin, cytoplasmic 1 OS=Homo sapiens GN=ACTB PE=1 SV=1	1133	42052	29	28	20	19	4842	1	1	1	977.536	1953.06	2	1953.06	0.0006	0	55.12	1.9e-05	R	VAPEEHPVLLTEAPLNPK	A				File4189 Spectrum3523 scans: 6350
5	1	ACTB_HUMAN	Actin, cytoplasmic 1 OS=Homo sapiens GN=ACTB PE=1 SV=1	1133	42052	29	28	20	19	5171	1	1	0	698.692	2093.06	3	2093.05	0.0012	1	16.41	0.029	K	SYELPDGQVITIGNERFR	C				File4189 Spectrum4512 scans: 7530
5	1	ACTB_HUMAN	Actin, cytoplasmic 1 OS=Homo sapiens GN=ACTB PE=1 SV=1	1133	42052	29	28	20	19	5331	1	1	0	719.385	2155.13	3	2155.13	0.0042	1	22.09	0.0085	K	AGFAGDDAPRAVFPSIVGRPR	H				File4189 Spectrum3800 scans: 6698
5	1	ACTB_HUMAN	Actin, cytoplasmic 1 OS=Homo sapiens GN=ACTB PE=1 SV=1	1133	42052	29	28	20	19	5520	1	1	1	1108.04	2214.06	2	2214.06	0.0011	0	126.83	1.3e-12	K	DLYANTVLSGGTTMYPGIADR	M				File4189 Spectrum5067 scans: 8166
5	1	ACTB_HUMAN	Actin, cytoplasmic 1 OS=Homo sapiens GN=ACTB PE=1 SV=1	1133	42052	29	28	20	19	5941	1	1	0	784.364	2350.07	3	2350.07	0.0009	1	103.26	2.1e-10	R	HQGVMVGMGQKDSYVGDEAQSK	R				File4189 Spectrum1694 scans: 3959
5	1	ACTB_HUMAN	Actin, cytoplasmic 1 OS=Homo sapiens GN=ACTB PE=1 SV=1	1133	42052	29	28	20	19	6375	1	1	0	627.55	2506.17	4	2506.17	0.0003	2	85.15	1e-08	R	HQGVMVGMGQKDSYVGDEAQSKR	G				File4189 Spectrum1410 scans: 3609
5	1	ACTB_HUMAN	Actin, cytoplasmic 1 OS=Homo sapiens GN=ACTB PE=1 SV=1	1133	42052	29	28	20	19	6415	1	1	0	631.548	2522.16	4	2522.16	0	2	31.05	0.0012	R	HQGVMVGMGQKDSYVGDEAQSKR	G	Oxidation (M)	0.00000001000000000000000.0		File4189 Spectrum725 scans: 2755
5	1	ACTB_HUMAN	Actin, cytoplasmic 1 OS=Homo sapiens GN=ACTB PE=1 SV=1	1133	42052	29	28	20	19	6487	1	1	1	1275.59	2549.17	2	2549.17	-0.0002	0	79.51	4.1e-08	K	LCYVALDFEQEMATAASSSSLEK	S				File4189 Spectrum6670 scans: 9981
5	1	ACTB_HUMAN	Actin, cytoplasmic 1 OS=Homo sapiens GN=ACTB PE=1 SV=1	1133	42052	29	28	20	19	7645	1	1	1	1034.5	3100.49	3	3100.5	-0.007	2	108.92	6.1e-11	K	CDVDIRKDLYANTVLSGGTTMYPGIADR	M				File4189 Spectrum4849 scans: 7916
5	1	ACTB_HUMAN	Actin, cytoplasmic 1 OS=Homo sapiens GN=ACTB PE=1 SV=1	1133	42052	29	28	20	19	7646	1	1	1	776.13	3100.49	4	3100.5	-0.0034	2	52.9	1.1e-05	K	CDVDIRKDLYANTVLSGGTTMYPGIADR	M				File4189 Spectrum4834 scans: 7900
5	1	ACTB_HUMAN	Actin, cytoplasmic 1 OS=Homo sapiens GN=ACTB PE=1 SV=1	1133	42052	29	28	20	19	7848	1	1	1	1077.83	3230.45	3	3230.45	-0.0007	0	50.83	3.1e-05	R	CPEALFQPSFLGMESCGIHETTFNSIMK	C				File4189 Spectrum6656 scans: 9964
5	1	ACTB_HUMAN	Actin, cytoplasmic 1 OS=Homo sapiens GN=ACTB PE=1 SV=1	1133	42052	29	28	20	19	9308	1	1	1	1025.76	4099.02	4	4099.01	0.0048	1	55.49	1.7e-05	K	YSVWIGGSILASLSTFQQMWISKQEYDESGPSIVHR	K				File4189 Spectrum9178 scans: 13021
5	1	ACTB_HUMAN	Actin, cytoplasmic 1 OS=Homo sapiens GN=ACTB PE=1 SV=1	1133	42052	29	28	20	19	9482	1	1	1	846.429	4227.11	5	4227.11	0.0003	2	14.46	0.06	K	YSVWIGGSILASLSTFQQMWISKQEYDESGPSIVHRK	C				File4189 Spectrum8800 scans: 12474
5	2	ACTC_HUMAN	Actin, alpha cardiac muscle 1 OS=Homo sapiens GN=ACTC1 PE=1 SV=1	677	42334	21	19	16	14	1423	1	0	0	488.728	975.44	2	975.441	-0.0006	0	52.28	2.1e-05	K	AGFAGDDAPR	A				File4189 Spectrum728 scans: 2759
5	2	ACTC_HUMAN	Actin, alpha cardiac muscle 1 OS=Homo sapiens GN=ACTC1 PE=1 SV=1	677	42334	21	19	16	14	1424	1	0	0	488.728	975.441	2	975.441	-0.0003	0	71.59	2.4e-07	K	AGFAGDDAPR	A				File4189 Spectrum666 scans: 2682
5	2	ACTC_HUMAN	Actin, alpha cardiac muscle 1 OS=Homo sapiens GN=ACTC1 PE=1 SV=1	677	42334	21	19	16	14	2373	1	0	0	581.313	1160.61	2	1160.61	0.0001	0	40.36	0.0013	K	EITALAPSTMK	I				File4189 Spectrum2438 scans: 4932
5	2	ACTC_HUMAN	Actin, alpha cardiac muscle 1 OS=Homo sapiens GN=ACTC1 PE=1 SV=1	677	42334	21	19	16	14	2434	1	0	0	586.289	1170.56	2	1170.56	0.0002	0	77.27	7.9e-08	R	HQGVMVGMGQK	D				File4189 Spectrum773 scans: 2815
5	2	ACTC_HUMAN	Actin, alpha cardiac muscle 1 OS=Homo sapiens GN=ACTC1 PE=1 SV=1	677	42334	21	19	16	14	2542	1	0	0	599.765	1197.52	2	1197.52	0.0002	0	39.98	0.00028	K	DSYVGDEAQSK	R				File4189 Spectrum314 scans: 2240
5	2	ACTC_HUMAN	Actin, alpha cardiac muscle 1 OS=Homo sapiens GN=ACTC1 PE=1 SV=1	677	42334	21	19	16	14	2548	1	0	0	400.24	1197.7	3	1197.7	0.0001	0	27.81	0.0025	R	AVFPSIVGRPR	H				File4189 Spectrum2938 scans: 5586
5	2	ACTC_HUMAN	Actin, alpha cardiac muscle 1 OS=Homo sapiens GN=ACTC1 PE=1 SV=1	677	42334	21	19	16	14	3156	1	0	0	452.212	1353.62	3	1353.62	-0.0003	1	47.88	4.7e-05	K	DSYVGDEAQSKR	G				File4189 Spectrum209 scans: 2112
5	2	ACTC_HUMAN	Actin, alpha cardiac muscle 1 OS=Homo sapiens GN=ACTC1 PE=1 SV=1	677	42334	21	19	16	14	3157	1	0	0	677.815	1353.62	2	1353.62	-0.0001	1	59.43	2.7e-06	K	DSYVGDEAQSKR	G				File4189 Spectrum207 scans: 2109
5	2	ACTC_HUMAN	Actin, alpha cardiac muscle 1 OS=Homo sapiens GN=ACTC1 PE=1 SV=1	677	42334	21	19	16	14	3265	1	0	0	468.271	1401.79	3	1401.79	0.0001	1	21.74	0.0091	K	EITALAPSTMKIK	I				File4189 Spectrum2929 scans: 5574
5	2	ACTC_HUMAN	Actin, alpha cardiac muscle 1 OS=Homo sapiens GN=ACTC1 PE=1 SV=1	677	42334	21	19	16	14	3657	1	0	0	774.909	1547.8	2	1547.81	-0.002	1	45.68	0.00032	R	MQKEITALAPSTMK	I				File4189 Spectrum2383 scans: 4858
5	2	ACTC_HUMAN	Actin, alpha cardiac muscle 1 OS=Homo sapiens GN=ACTC1 PE=1 SV=1	677	42334	21	19	16	14	3658	1	0	0	774.91	1547.8	2	1547.81	-0.0004	1	73.73	5e-07	R	MQKEITALAPSTMK	I				File4189 Spectrum2324 scans: 4784
5	2	ACTC_HUMAN	Actin, alpha cardiac muscle 1 OS=Homo sapiens GN=ACTC1 PE=1 SV=1	677	42334	21	19	16	14	3659	1	0	0	516.942	1547.81	3	1547.81	0	1	77.35	2.2e-07	R	MQKEITALAPSTMK	I				File4189 Spectrum2335 scans: 4797
5	2	ACTC_HUMAN	Actin, alpha cardiac muscle 1 OS=Homo sapiens GN=ACTC1 PE=1 SV=1	677	42334	21	19	16	14	4312	1	0	0	895.95	1789.89	2	1789.88	0.0006	0	80	1.1e-07	K	SYELPDGQVITIGNER	F				File4189 Spectrum4432 scans: 7440
5	2	ACTC_HUMAN	Actin, alpha cardiac muscle 1 OS=Homo sapiens GN=ACTC1 PE=1 SV=1	677	42334	21	19	16	14	5171	1	0	0	698.692	2093.06	3	2093.05	0.0012	1	16.41	0.029	K	SYELPDGQVITIGNERFR	C				File4189 Spectrum4512 scans: 7530
5	2	ACTC_HUMAN	Actin, alpha cardiac muscle 1 OS=Homo sapiens GN=ACTC1 PE=1 SV=1	677	42334	21	19	16	14	5331	1	0	0	719.385	2155.13	3	2155.13	0.0042	1	22.09	0.0085	K	AGFAGDDAPRAVFPSIVGRPR	H				File4189 Spectrum3800 scans: 6698
5	2	ACTC_HUMAN	Actin, alpha cardiac muscle 1 OS=Homo sapiens GN=ACTC1 PE=1 SV=1	677	42334	21	19	16	14	5941	1	0	0	784.364	2350.07	3	2350.07	0.0009	1	103.26	2.1e-10	R	HQGVMVGMGQKDSYVGDEAQSK	R				File4189 Spectrum1694 scans: 3959
5	2	ACTC_HUMAN	Actin, alpha cardiac muscle 1 OS=Homo sapiens GN=ACTC1 PE=1 SV=1	677	42334	21	19	16	14	6375	1	0	0	627.55	2506.17	4	2506.17	0.0003	2	85.15	1e-08	R	HQGVMVGMGQKDSYVGDEAQSKR	G				File4189 Spectrum1410 scans: 3609
5	2	ACTC_HUMAN	Actin, alpha cardiac muscle 1 OS=Homo sapiens GN=ACTC1 PE=1 SV=1	677	42334	21	19	16	14	6415	1	0	0	631.548	2522.16	4	2522.16	0	2	31.05	0.0012	R	HQGVMVGMGQKDSYVGDEAQSKR	G	Oxidation (M)	0.00000001000000000000000.0		File4189 Spectrum725 scans: 2755
5	2	ACTC_HUMAN	Actin, alpha cardiac muscle 1 OS=Homo sapiens GN=ACTC1 PE=1 SV=1	677	42334	21	19	16	14	9289	1	0	1	817.418	4082.06	5	4082.05	0.005	2	27.96	0.0024	R	GILTLKYPIEHGIITNWDDMEKIWHHTFYNELR	V				File4189 Spectrum7161 scans: 10536
5	2	ACTC_HUMAN	Actin, alpha cardiac muscle 1 OS=Homo sapiens GN=ACTC1 PE=1 SV=1	677	42334	21	19	16	14	9308	2	0	1	1025.76	4099.02	4	4099.01	0.0048	1	15.04	0.19	K	YSVWIGGSILASLSTFQQMWISKQEYDEAGPSIVHR	K	Oxidation (M)	0.000000000000000000100000000000000000.0		File4189 Spectrum9178 scans: 13021
5	2	ACTC_HUMAN	Actin, alpha cardiac muscle 1 OS=Homo sapiens GN=ACTC1 PE=1 SV=1	677	42334	21	19	16	14	9482	2	0	1	846.429	4227.11	5	4227.11	0.0003	2	1.38	1.2	K	YSVWIGGSILASLSTFQQMWISKQEYDEAGPSIVHRK	C	Oxidation (M)	0.0000000000000000001000000000000000000.0		File4189 Spectrum8800 scans: 12474
5		ACTA_HUMAN	Actin, aortic smooth muscle OS=Homo sapiens GN=ACTA2 PE=1 SV=1	663	42381	20	18	15	13	1423	1	0	0	488.728	975.44	2	975.441	-0.0006	0	52.28	2.1e-05	K	AGFAGDDAPR	A				File4189 Spectrum728 scans: 2759
5		ACTA_HUMAN	Actin, aortic smooth muscle OS=Homo sapiens GN=ACTA2 PE=1 SV=1	663	42381	20	18	15	13	1424	1	0	0	488.728	975.441	2	975.441	-0.0003	0	71.59	2.4e-07	K	AGFAGDDAPR	A				File4189 Spectrum666 scans: 2682
5		ACTA_HUMAN	Actin, aortic smooth muscle OS=Homo sapiens GN=ACTA2 PE=1 SV=1	663	42381	20	18	15	13	2373	1	0	0	581.313	1160.61	2	1160.61	0.0001	0	40.36	0.0013	K	EITALAPSTMK	I				File4189 Spectrum2438 scans: 4932
5		ACTA_HUMAN	Actin, aortic smooth muscle OS=Homo sapiens GN=ACTA2 PE=1 SV=1	663	42381	20	18	15	13	2434	1	0	0	586.289	1170.56	2	1170.56	0.0002	0	77.27	7.9e-08	R	HQGVMVGMGQK	D				File4189 Spectrum773 scans: 2815
5		ACTA_HUMAN	Actin, aortic smooth muscle OS=Homo sapiens GN=ACTA2 PE=1 SV=1	663	42381	20	18	15	13	2542	1	0	0	599.765	1197.52	2	1197.52	0.0002	0	39.98	0.00028	K	DSYVGDEAQSK	R				File4189 Spectrum314 scans: 2240
5		ACTA_HUMAN	Actin, aortic smooth muscle OS=Homo sapiens GN=ACTA2 PE=1 SV=1	663	42381	20	18	15	13	2548	1	0	0	400.24	1197.7	3	1197.7	0.0001	0	27.81	0.0025	R	AVFPSIVGRPR	H				File4189 Spectrum2938 scans: 5586
5		ACTA_HUMAN	Actin, aortic smooth muscle OS=Homo sapiens GN=ACTA2 PE=1 SV=1	663	42381	20	18	15	13	3156	1	0	0	452.212	1353.62	3	1353.62	-0.0003	1	47.88	4.7e-05	K	DSYVGDEAQSKR	G				File4189 Spectrum209 scans: 2112
5		ACTA_HUMAN	Actin, aortic smooth muscle OS=Homo sapiens GN=ACTA2 PE=1 SV=1	663	42381	20	18	15	13	3157	1	0	0	677.815	1353.62	2	1353.62	-0.0001	1	59.43	2.7e-06	K	DSYVGDEAQSKR	G				File4189 Spectrum207 scans: 2109
5		ACTA_HUMAN	Actin, aortic smooth muscle OS=Homo sapiens GN=ACTA2 PE=1 SV=1	663	42381	20	18	15	13	3265	1	0	0	468.271	1401.79	3	1401.79	0.0001	1	21.74	0.0091	K	EITALAPSTMKIK	I				File4189 Spectrum2929 scans: 5574
5		ACTA_HUMAN	Actin, aortic smooth muscle OS=Homo sapiens GN=ACTA2 PE=1 SV=1	663	42381	20	18	15	13	3657	1	0	0	774.909	1547.8	2	1547.81	-0.002	1	45.68	0.00032	R	MQKEITALAPSTMK	I				File4189 Spectrum2383 scans: 4858
5		ACTA_HUMAN	Actin, aortic smooth muscle OS=Homo sapiens GN=ACTA2 PE=1 SV=1	663	42381	20	18	15	13	3658	1	0	0	774.91	1547.8	2	1547.81	-0.0004	1	73.73	5e-07	R	MQKEITALAPSTMK	I				File4189 Spectrum2324 scans: 4784
5		ACTA_HUMAN	Actin, aortic smooth muscle OS=Homo sapiens GN=ACTA2 PE=1 SV=1	663	42381	20	18	15	13	3659	1	0	0	516.942	1547.81	3	1547.81	0	1	77.35	2.2e-07	R	MQKEITALAPSTMK	I				File4189 Spectrum2335 scans: 4797
5		ACTA_HUMAN	Actin, aortic smooth muscle OS=Homo sapiens GN=ACTA2 PE=1 SV=1	663	42381	20	18	15	13	4312	1	0	0	895.95	1789.89	2	1789.88	0.0006	0	80	1.1e-07	K	SYELPDGQVITIGNER	F				File4189 Spectrum4432 scans: 7440
5		ACTA_HUMAN	Actin, aortic smooth muscle OS=Homo sapiens GN=ACTA2 PE=1 SV=1	663	42381	20	18	15	13	5171	1	0	0	698.692	2093.06	3	2093.05	0.0012	1	16.41	0.029	K	SYELPDGQVITIGNERFR	C				File4189 Spectrum4512 scans: 7530
5		ACTA_HUMAN	Actin, aortic smooth muscle OS=Homo sapiens GN=ACTA2 PE=1 SV=1	663	42381	20	18	15	13	5331	1	0	0	719.385	2155.13	3	2155.13	0.0042	1	22.09	0.0085	K	AGFAGDDAPRAVFPSIVGRPR	H				File4189 Spectrum3800 scans: 6698
5		ACTA_HUMAN	Actin, aortic smooth muscle OS=Homo sapiens GN=ACTA2 PE=1 SV=1	663	42381	20	18	15	13	5941	1	0	0	784.364	2350.07	3	2350.07	0.0009	1	103.26	2.1e-10	R	HQGVMVGMGQKDSYVGDEAQSK	R				File4189 Spectrum1694 scans: 3959
5		ACTA_HUMAN	Actin, aortic smooth muscle OS=Homo sapiens GN=ACTA2 PE=1 SV=1	663	42381	20	18	15	13	6375	1	0	0	627.55	2506.17	4	2506.17	0.0003	2	85.15	1e-08	R	HQGVMVGMGQKDSYVGDEAQSKR	G				File4189 Spectrum1410 scans: 3609
5		ACTA_HUMAN	Actin, aortic smooth muscle OS=Homo sapiens GN=ACTA2 PE=1 SV=1	663	42381	20	18	15	13	6415	1	0	0	631.548	2522.16	4	2522.16	0	2	31.05	0.0012	R	HQGVMVGMGQKDSYVGDEAQSKR	G	Oxidation (M)	0.00000001000000000000000.0		File4189 Spectrum725 scans: 2755
5		ACTA_HUMAN	Actin, aortic smooth muscle OS=Homo sapiens GN=ACTA2 PE=1 SV=1	663	42381	20	18	15	13	9308	2	0	1	1025.76	4099.02	4	4099.01	0.0048	1	15.04	0.19	K	YSVWIGGSILASLSTFQQMWISKQEYDEAGPSIVHR	K	Oxidation (M)	0.000000000000000000100000000000000000.0		File4189 Spectrum9178 scans: 13021
5		ACTA_HUMAN	Actin, aortic smooth muscle OS=Homo sapiens GN=ACTA2 PE=1 SV=1	663	42381	20	18	15	13	9482	2	0	1	846.429	4227.11	5	4227.11	0.0003	2	1.38	1.2	K	YSVWIGGSILASLSTFQQMWISKQEYDEAGPSIVHRK	C	Oxidation (M)	0.0000000000000000001000000000000000000.0		File4189 Spectrum8800 scans: 12474
5		POTEE_HUMAN	POTE ankyrin domain family member E OS=Homo sapiens GN=POTEE PE=1 SV=3	248	122882	10	7	8	6	1423	1	0	0	488.728	975.44	2	975.441	-0.0006	0	52.28	2.1e-05	K	AGFAGDDAPR	A				File4189 Spectrum728 scans: 2759
5		POTEE_HUMAN	POTE ankyrin domain family member E OS=Homo sapiens GN=POTEE PE=1 SV=3	248	122882	10	7	8	6	1424	1	0	0	488.728	975.441	2	975.441	-0.0003	0	71.59	2.4e-07	K	AGFAGDDAPR	A				File4189 Spectrum666 scans: 2682
5		POTEE_HUMAN	POTE ankyrin domain family member E OS=Homo sapiens GN=POTEE PE=1 SV=3	248	122882	10	7	8	6	2084	2	0	1	554.275	1106.53	2	1106.53	0.007	0	5.84	1.8	K	MSQELEINK	D	Oxidation (M)	0.100000000.0		File4189 Spectrum874 scans: 2941
5		POTEE_HUMAN	POTE ankyrin domain family member E OS=Homo sapiens GN=POTEE PE=1 SV=3	248	122882	10	7	8	6	2085	2	0	1	554.275	1106.54	2	1106.53	0.0075	0	3.72	1.6	K	MSQELEINK	D	Oxidation (M)	0.100000000.0		File4189 Spectrum943 scans: 3022
5		POTEE_HUMAN	POTE ankyrin domain family member E OS=Homo sapiens GN=POTEE PE=1 SV=3	248	122882	10	7	8	6	2548	1	0	0	400.24	1197.7	3	1197.7	0.0001	0	27.81	0.0025	R	AVFPSIVGRPR	Q				File4189 Spectrum2938 scans: 5586
5		POTEE_HUMAN	POTE ankyrin domain family member E OS=Homo sapiens GN=POTEE PE=1 SV=3	248	122882	10	7	8	6	4312	1	0	0	895.95	1789.89	2	1789.88	0.0006	0	80	1.1e-07	K	SYELPDGQVITIGNER	F				File4189 Spectrum4432 scans: 7440
5		POTEE_HUMAN	POTE ankyrin domain family member E OS=Homo sapiens GN=POTEE PE=1 SV=3	248	122882	10	7	8	6	5171	1	0	0	698.692	2093.06	3	2093.05	0.0012	1	16.41	0.029	K	SYELPDGQVITIGNERFR	C				File4189 Spectrum4512 scans: 7530
5		POTEE_HUMAN	POTE ankyrin domain family member E OS=Homo sapiens GN=POTEE PE=1 SV=3	248	122882	10	7	8	6	5331	1	0	0	719.385	2155.13	3	2155.13	0.0042	1	22.09	0.0085	K	AGFAGDDAPRAVFPSIVGRPR	Q				File4189 Spectrum3800 scans: 6698
5		POTEE_HUMAN	POTE ankyrin domain family member E OS=Homo sapiens GN=POTEE PE=1 SV=3	248	122882	10	7	8	6	5723	2	0	1	760.734	2279.18	3	2279.17	0.0143	1	0.8	1.7	-	MVVEVDSMPAASSVKKPFGLR	S	2 Oxidation (M)	0.100000010000000000000.0		File4189 Spectrum5822 scans: 9016
5		POTEE_HUMAN	POTE ankyrin domain family member E OS=Homo sapiens GN=POTEE PE=1 SV=3	248	122882	10	7	8	6	6487	1	0	1	1275.59	2549.17	2	2549.17	-0.0002	0	79.51	4.1e-08	K	LCYVALDFEQEMATAASSSSLEK	S				File4189 Spectrum6670 scans: 9981
5		POTEF_HUMAN	POTE ankyrin domain family member F OS=Homo sapiens GN=POTEF PE=1 SV=2	186	123020	7	6	6	5	1423	1	0	0	488.728	975.44	2	975.441	-0.0006	0	52.28	2.1e-05	K	AGFAGDDAPR	A				File4189 Spectrum728 scans: 2759
5		POTEF_HUMAN	POTE ankyrin domain family member F OS=Homo sapiens GN=POTEF PE=1 SV=2	186	123020	7	6	6	5	1424	1	0	0	488.728	975.441	2	975.441	-0.0003	0	71.59	2.4e-07	K	AGFAGDDAPR	A				File4189 Spectrum666 scans: 2682
5		POTEF_HUMAN	POTE ankyrin domain family member F OS=Homo sapiens GN=POTEF PE=1 SV=2	186	123020	7	6	6	5	2548	1	0	0	400.24	1197.7	3	1197.7	0.0001	0	27.81	0.0025	R	AVFPSIVGRPR	Q				File4189 Spectrum2938 scans: 5586
5		POTEF_HUMAN	POTE ankyrin domain family member F OS=Homo sapiens GN=POTEF PE=1 SV=2	186	123020	7	6	6	5	4312	1	0	0	895.95	1789.89	2	1789.88	0.0006	0	80	1.1e-07	K	SYELPDGQVITIGNER	F				File4189 Spectrum4432 scans: 7440
5		POTEF_HUMAN	POTE ankyrin domain family member F OS=Homo sapiens GN=POTEF PE=1 SV=2	186	123020	7	6	6	5	5171	1	0	0	698.692	2093.06	3	2093.05	0.0012	1	16.41	0.029	K	SYELPDGQVITIGNERFR	C				File4189 Spectrum4512 scans: 7530
5		POTEF_HUMAN	POTE ankyrin domain family member F OS=Homo sapiens GN=POTEF PE=1 SV=2	186	123020	7	6	6	5	5331	1	0	0	719.385	2155.13	3	2155.13	0.0042	1	22.09	0.0085	K	AGFAGDDAPRAVFPSIVGRPR	Q				File4189 Spectrum3800 scans: 6698
5		POTEF_HUMAN	POTE ankyrin domain family member F OS=Homo sapiens GN=POTEF PE=1 SV=2	186	123020	7	6	6	5	5723	2	0	1	760.734	2279.18	3	2279.17	0.0143	1	0.8	1.7	-	MVVEVDSMPAASSVKKPFGLR	S	2 Oxidation (M)	0.100000010000000000000.0		File4189 Spectrum5822 scans: 9016
5		ACTBL_HUMAN	Beta-actin-like protein 2 OS=Homo sapiens GN=ACTBL2 PE=1 SV=2	152	42318	7	6	4	4	2434	1	0	0	586.289	1170.56	2	1170.56	0.0002	0	77.27	7.9e-08	R	HQGVMVGMGQK	D				File4189 Spectrum773 scans: 2815
5		ACTBL_HUMAN	Beta-actin-like protein 2 OS=Homo sapiens GN=ACTBL2 PE=1 SV=2	152	42318	7	6	4	4	4312	1	0	0	895.95	1789.89	2	1789.88	0.0006	0	80	1.1e-07	R	SYELPDGQVITIGNER	F				File4189 Spectrum4432 scans: 7440
5		ACTBL_HUMAN	Beta-actin-like protein 2 OS=Homo sapiens GN=ACTBL2 PE=1 SV=2	152	42318	7	6	4	4	4839	2	0	1	977.536	1953.06	2	1953.06	-0.0002	0	21.93	0.04	R	VAPDEHPILLTEAPLNPK	I				File4189 Spectrum3475 scans: 6290
5		ACTBL_HUMAN	Beta-actin-like protein 2 OS=Homo sapiens GN=ACTBL2 PE=1 SV=2	152	42318	7	6	4	4	4840	2	0	1	652.026	1953.06	3	1953.06	0.0002	0	14.2	0.24	R	VAPDEHPILLTEAPLNPK	I				File4189 Spectrum3521 scans: 6348
5		ACTBL_HUMAN	Beta-actin-like protein 2 OS=Homo sapiens GN=ACTBL2 PE=1 SV=2	152	42318	7	6	4	4	4841	2	0	1	652.026	1953.06	3	1953.06	0.0004	0	29.68	0.0067	R	VAPDEHPILLTEAPLNPK	I				File4189 Spectrum3472 scans: 6287
5		ACTBL_HUMAN	Beta-actin-like protein 2 OS=Homo sapiens GN=ACTBL2 PE=1 SV=2	152	42318	7	6	4	4	4842	2	0	1	977.536	1953.06	2	1953.06	0.0006	0	24.19	0.024	R	VAPDEHPILLTEAPLNPK	I				File4189 Spectrum3523 scans: 6350
5		ACTBL_HUMAN	Beta-actin-like protein 2 OS=Homo sapiens GN=ACTBL2 PE=1 SV=2	152	42318	7	6	4	4	5171	1	0	0	698.692	2093.06	3	2093.05	0.0012	1	16.41	0.029	R	SYELPDGQVITIGNERFR	C				File4189 Spectrum4512 scans: 7530
5		POTEI_HUMAN	POTE ankyrin domain family member I OS=Homo sapiens GN=POTEI PE=3 SV=1	126	122858	4	4	3	3	1423	1	0	0	488.728	975.44	2	975.441	-0.0006	0	52.28	2.1e-05	K	AGFAGDDAPR	A				File4189 Spectrum728 scans: 2759
5		POTEI_HUMAN	POTE ankyrin domain family member I OS=Homo sapiens GN=POTEI PE=3 SV=1	126	122858	4	4	3	3	1424	1	0	0	488.728	975.441	2	975.441	-0.0003	0	71.59	2.4e-07	K	AGFAGDDAPR	A				File4189 Spectrum666 scans: 2682
5		POTEI_HUMAN	POTE ankyrin domain family member I OS=Homo sapiens GN=POTEI PE=3 SV=1	126	122858	4	4	3	3	2548	1	0	0	400.24	1197.7	3	1197.7	0.0001	0	27.81	0.0025	R	AVFPSIVGRPR	Q				File4189 Spectrum2938 scans: 5586
5		POTEI_HUMAN	POTE ankyrin domain family member I OS=Homo sapiens GN=POTEI PE=3 SV=1	126	122858	4	4	3	3	5331	1	0	0	719.385	2155.13	3	2155.13	0.0042	1	22.09	0.0085	K	AGFAGDDAPRAVFPSIVGRPR	Q				File4189 Spectrum3800 scans: 6698
5		POTEJ_HUMAN	POTE ankyrin domain family member J OS=Homo sapiens GN=POTEJ PE=3 SV=1	106	118740	2	2	1	1	1423	1	0	0	488.728	975.44	2	975.441	-0.0006	0	52.28	2.1e-05	K	AGFAGDDAPR	A				File4189 Spectrum728 scans: 2759
5		POTEJ_HUMAN	POTE ankyrin domain family member J OS=Homo sapiens GN=POTEJ PE=3 SV=1	106	118740	2	2	1	1	1424	1	0	0	488.728	975.441	2	975.441	-0.0003	0	71.59	2.4e-07	K	AGFAGDDAPR	A				File4189 Spectrum666 scans: 2682
5		ACTBM_HUMAN	Putative beta-actin-like protein 3 OS=Homo sapiens GN=POTEKP PE=5 SV=1	78	42331	2	2	2	2	4312	1	0	0	895.95	1789.89	2	1789.88	0.0006	0	80	1.1e-07	K	SYELPDGQVITIGNER	F				File4189 Spectrum4432 scans: 7440
5		ACTBM_HUMAN	Putative beta-actin-like protein 3 OS=Homo sapiens GN=POTEKP PE=5 SV=1	78	42331	2	2	2	2	5171	1	0	0	698.692	2093.06	3	2093.05	0.0012	1	16.41	0.029	K	SYELPDGQVITIGNERFR	C				File4189 Spectrum4512 scans: 7530
6	1	GRP75_HUMAN	Stress-70 protein, mitochondrial OS=Homo sapiens GN=HSPA9 PE=1 SV=2	1030	73920	29	29	20	20	2719	1	1	1	621.844	1241.67	2	1241.67	0.0002	0	62.3	7.2e-06	K	DAGQISGLNVLR	V				File4189 Spectrum3611 scans: 6457
6	1	GRP75_HUMAN	Stress-70 protein, mitochondrial OS=Homo sapiens GN=HSPA9 PE=1 SV=2	1030	73920	29	29	20	20	2930	1	1	1	643.347	1284.68	2	1284.68	0.0004	1	32.48	0.0011	K	QAKVLENAEGAR	T				File4189 Spectrum412 scans: 2366
6	1	GRP75_HUMAN	Stress-70 protein, mitochondrial OS=Homo sapiens GN=HSPA9 PE=1 SV=2	1030	73920	29	29	20	20	3113	1	1	1	671.313	1340.61	2	1340.61	0.0006	0	67.41	4.8e-07	R	ASNGDAWVEAHGK	L				File4189 Spectrum806 scans: 2858
6	1	GRP75_HUMAN	Stress-70 protein, mitochondrial OS=Homo sapiens GN=HSPA9 PE=1 SV=2	1030	73920	29	29	20	20	3175	1	1	1	681.375	1360.74	2	1360.74	0.0001	0	49.2	2.4e-05	R	AQFEGIVTDLIR	R				File4189 Spectrum5929 scans: 9139
6	1	GRP75_HUMAN	Stress-70 protein, mitochondrial OS=Homo sapiens GN=HSPA9 PE=1 SV=2	1030	73920	29	29	20	20	3400	1	1	1	725.862	1449.71	2	1449.71	0.0004	0	66.53	5.9e-07	R	TTPSVVAFTADGER	L				File4189 Spectrum3001 scans: 5673
6	1	GRP75_HUMAN	Stress-70 protein, mitochondrial OS=Homo sapiens GN=HSPA9 PE=1 SV=2	1030	73920	29	29	20	20	3543	1	1	1	502.591	1504.75	3	1504.75	0.0003	2	24.2	0.028	R	RYDDPEVQKDIK	N				File4189 Spectrum656 scans: 2668
6	1	GRP75_HUMAN	Stress-70 protein, mitochondrial OS=Homo sapiens GN=HSPA9 PE=1 SV=2	1030	73920	29	29	20	20	3571	1	1	1	506.619	1516.84	3	1516.84	-0.0004	1	39.64	0.00019	R	AQFEGIVTDLIRR	T				File4189 Spectrum5184 scans: 8299
6	1	GRP75_HUMAN	Stress-70 protein, mitochondrial OS=Homo sapiens GN=HSPA9 PE=1 SV=2	1030	73920	29	29	20	20	3572	1	1	1	759.426	1516.84	2	1516.84	0.0021	1	19.78	0.014	R	AQFEGIVTDLIRR	T				File4189 Spectrum5213 scans: 8331
6	1	GRP75_HUMAN	Stress-70 protein, mitochondrial OS=Homo sapiens GN=HSPA9 PE=1 SV=2	1030	73920	29	29	20	20	3674	1	1	1	777.423	1552.83	2	1552.83	-0.0002	0	55.11	6.8e-06	K	LYSPSQIGAFVLMK	M				File4189 Spectrum6322 scans: 9589
6	1	GRP75_HUMAN	Stress-70 protein, mitochondrial OS=Homo sapiens GN=HSPA9 PE=1 SV=2	1030	73920	29	29	20	20	3675	1	1	1	777.424	1552.83	2	1552.83	0.0004	0	64.29	9.4e-07	K	LYSPSQIGAFVLMK	M				File4189 Spectrum6271 scans: 9530
6	1	GRP75_HUMAN	Stress-70 protein, mitochondrial OS=Homo sapiens GN=HSPA9 PE=1 SV=2	1030	73920	29	29	20	20	3722	1	1	1	784.889	1567.76	2	1567.76	0.0002	0	82.79	1.7e-08	R	QAVTNPNNTFYATK	R				File4189 Spectrum1732 scans: 4005
6	1	GRP75_HUMAN	Stress-70 protein, mitochondrial OS=Homo sapiens GN=HSPA9 PE=1 SV=2	1030	73920	29	29	20	20	3771	1	1	1	796.889	1591.76	2	1591.77	-0.002	1	24.19	0.0054	K	MKETAENYLGHTAK	N				File4189 Spectrum927 scans: 3002
6	1	GRP75_HUMAN	Stress-70 protein, mitochondrial OS=Homo sapiens GN=HSPA9 PE=1 SV=2	1030	73920	29	29	20	20	3772	1	1	1	531.596	1591.77	3	1591.77	-0.0004	1	77.85	9.9e-08	K	MKETAENYLGHTAK	N				File4189 Spectrum901 scans: 2973
6	1	GRP75_HUMAN	Stress-70 protein, mitochondrial OS=Homo sapiens GN=HSPA9 PE=1 SV=2	1030	73920	29	29	20	20	3981	1	1	1	835.963	1669.91	2	1669.91	-0.0003	1	73.04	3.8e-07	R	QATKDAGQISGLNVLR	V				File4189 Spectrum2885 scans: 5516
6	1	GRP75_HUMAN	Stress-70 protein, mitochondrial OS=Homo sapiens GN=HSPA9 PE=1 SV=2	1030	73920	29	29	20	20	3993	1	1	1	837.452	1672.89	2	1672.89	-0.0001	1	49.38	2.3e-05	K	VQQTVQDLFGRAPSK	A				File4189 Spectrum2990 scans: 5658
6	1	GRP75_HUMAN	Stress-70 protein, mitochondrial OS=Homo sapiens GN=HSPA9 PE=1 SV=2	1030	73920	29	29	20	20	4033	1	1	1	845.925	1689.84	2	1689.84	-0.0005	1	55.68	6e-06	R	ETGVDLTKDNMALQR	V				File4189 Spectrum2393 scans: 4873
6	1	GRP75_HUMAN	Stress-70 protein, mitochondrial OS=Homo sapiens GN=HSPA9 PE=1 SV=2	1030	73920	29	29	20	20	4041	1	1	1	847.928	1693.84	2	1693.84	-0.0013	0	51.2	1.6e-05	K	NAVITVPAYFNDSQR	Q				File4189 Spectrum4130 scans: 7084
6	1	GRP75_HUMAN	Stress-70 protein, mitochondrial OS=Homo sapiens GN=HSPA9 PE=1 SV=2	1030	73920	29	29	20	20	4042	1	1	1	847.928	1693.84	2	1693.84	-0.0005	0	19.36	0.015	K	NAVITVPAYFNDSQR	Q				File4189 Spectrum4192 scans: 7156
6	1	GRP75_HUMAN	Stress-70 protein, mitochondrial OS=Homo sapiens GN=HSPA9 PE=1 SV=2	1030	73920	29	29	20	20	4121	1	1	1	575.629	1723.86	3	1723.86	0.0003	1	37.39	0.00031	R	QAVTNPNNTFYATKR	L				File4189 Spectrum1368 scans: 3548
6	1	GRP75_HUMAN	Stress-70 protein, mitochondrial OS=Homo sapiens GN=HSPA9 PE=1 SV=2	1030	73920	29	29	20	20	4122	1	1	1	575.629	1723.86	3	1723.86	0.0006	1	41.07	0.00014	R	QAVTNPNNTFYATKR	L				File4189 Spectrum1304 scans: 3470
6	1	GRP75_HUMAN	Stress-70 protein, mitochondrial OS=Homo sapiens GN=HSPA9 PE=1 SV=2	1030	73920	29	29	20	20	5072	1	1	1	1028.48	2054.95	2	2054.95	-0.004	0	48.68	3.2e-05	K	STNGDTFLGGEDFDQALLR	H				File4189 Spectrum5750 scans: 8933
6	1	GRP75_HUMAN	Stress-70 protein, mitochondrial OS=Homo sapiens GN=HSPA9 PE=1 SV=2	1030	73920	29	29	20	20	5127	1	1	1	1039.52	2077.02	2	2077.02	0.0022	0	77.05	6e-08	K	GAVVGIDLGTTNSCVAVMEGK	Q				File4189 Spectrum4517 scans: 7535
6	1	GRP75_HUMAN	Stress-70 protein, mitochondrial OS=Homo sapiens GN=HSPA9 PE=1 SV=2	1030	73920	29	29	20	20	5819	1	1	1	576.56	2302.21	4	2302.21	-0.0012	2	33.41	0.00074	R	TTPSVVAFTADGERLVGMPAKR	Q				File4189 Spectrum4469 scans: 7481
6	1	GRP75_HUMAN	Stress-70 protein, mitochondrial OS=Homo sapiens GN=HSPA9 PE=1 SV=2	1030	73920	29	29	20	20	5820	1	1	1	768.41	2302.21	3	2302.21	-0.0012	2	29.46	0.0017	R	TTPSVVAFTADGERLVGMPAKR	Q				File4189 Spectrum4490 scans: 7506
6	1	GRP75_HUMAN	Stress-70 protein, mitochondrial OS=Homo sapiens GN=HSPA9 PE=1 SV=2	1030	73920	29	29	20	20	6100	1	1	1	802.739	2405.19	3	2405.19	0.0005	1	71.73	4.3e-07	K	AMQDAEVSKSDIGEVILVGGMTR	M				File4189 Spectrum4840 scans: 7907
6	1	GRP75_HUMAN	Stress-70 protein, mitochondrial OS=Homo sapiens GN=HSPA9 PE=1 SV=2	1030	73920	29	29	20	20	6101	1	1	1	802.739	2405.2	3	2405.19	0.0026	1	82.81	3.8e-08	K	AMQDAEVSKSDIGEVILVGGMTR	M				File4189 Spectrum4772 scans: 7828
6	1	GRP75_HUMAN	Stress-70 protein, mitochondrial OS=Homo sapiens GN=HSPA9 PE=1 SV=2	1030	73920	29	29	20	20	6102	1	1	1	1203.61	2405.2	2	2405.19	0.0026	1	135.84	3.2e-13	K	AMQDAEVSKSDIGEVILVGGMTR	M				File4189 Spectrum4791 scans: 7850
6	1	GRP75_HUMAN	Stress-70 protein, mitochondrial OS=Homo sapiens GN=HSPA9 PE=1 SV=2	1030	73920	29	29	20	20	8064	1	1	1	837.442	3345.74	4	3345.74	-0.0032	2	16.4	0.029	K	NAVITVPAYFNDSQRQATKDAGQISGLNVLR	V				File4189 Spectrum5287 scans: 8415
6	1	GRP75_HUMAN	Stress-70 protein, mitochondrial OS=Homo sapiens GN=HSPA9 PE=1 SV=2	1030	73920	29	29	20	20	8065	1	1	1	1116.25	3345.74	3	3345.74	-0.0012	2	14.38	0.045	K	NAVITVPAYFNDSQRQATKDAGQISGLNVLR	V				File4189 Spectrum5302 scans: 8431
7	1	K1C9_HUMAN	Keratin, type I cytoskeletal 9 OS=Homo sapiens GN=KRT9 PE=1 SV=3	905	62255	23	19	16	15	1853	1	1	1	533.254	1064.49	2	1064.49	0.0004	0	47.84	3.3e-05	K	STMQELNSR	L				File4189 Spectrum604 scans: 2600
7	1	K1C9_HUMAN	Keratin, type I cytoskeletal 9 OS=Homo sapiens GN=KRT9 PE=1 SV=3	905	62255	23	19	16	15	2683	1	1	1	616.803	1231.59	2	1231.59	-0.0001	0	103.74	3.6e-10	R	SGGGGGGGLGSGGSIR	S				File4189 Spectrum568 scans: 2557
7	1	K1C9_HUMAN	Keratin, type I cytoskeletal 9 OS=Homo sapiens GN=KRT9 PE=1 SV=3	905	62255	23	19	16	15	2694	1	1	1	618.268	1234.52	2	1234.52	-0.0007	0	58.75	2.5e-06	R	FSSSSGYGGGSSR	V				File4189 Spectrum242 scans: 2159
7	1	K1C9_HUMAN	Keratin, type I cytoskeletal 9 OS=Homo sapiens GN=KRT9 PE=1 SV=3	905	62255	23	19	16	15	3014	1	1	1	436.564	1306.67	3	1306.67	-0.0008	1	51.74	6.9e-05	R	IKFEMEQNLR	Q				File4189 Spectrum2698 scans: 5271
7	1	K1C9_HUMAN	Keratin, type I cytoskeletal 9 OS=Homo sapiens GN=KRT9 PE=1 SV=3	905	62255	23	19	16	15	3015	1	1	1	654.342	1306.67	2	1306.67	-0.0001	1	46.38	0.0002	R	IKFEMEQNLR	Q				File4189 Spectrum2695 scans: 5267
7	1	K1C9_HUMAN	Keratin, type I cytoskeletal 9 OS=Homo sapiens GN=KRT9 PE=1 SV=3	905	62255	23	19	16	15	3142	1	1	1	450.901	1349.68	3	1349.68	0.0006	1	18	0.02	K	IGLGGRGGSGGSYGR	G				File4189 Spectrum729 scans: 2760
7	1	K1C9_HUMAN	Keratin, type I cytoskeletal 9 OS=Homo sapiens GN=KRT9 PE=1 SV=3	905	62255	23	19	16	15	4315	1	1	1	896.367	1790.72	2	1790.72	-0.0001	0	126.05	2.5e-13	R	GGSGGSYGGGGSGGGYGGGSGSR	G				File4189 Spectrum163 scans: 2058
7	1	K1C9_HUMAN	Keratin, type I cytoskeletal 9 OS=Homo sapiens GN=KRT9 PE=1 SV=3	905	62255	23	19	16	15	4506	1	1	1	613.327	1836.96	3	1836.96	0.0002	0	50.76	1.7e-05	R	HGVQELEIELQSQLSK	K				File4189 Spectrum4642 scans: 7682
7	1	K1C9_HUMAN	Keratin, type I cytoskeletal 9 OS=Homo sapiens GN=KRT9 PE=1 SV=3	905	62255	23	19	16	15	4546	1	1	1	617.98	1850.92	3	1850.92	-0.0004	1	10.71	0.17	K	TLNDMRQEYEQLIAK	N				File4189 Spectrum4252 scans: 7229
7	1	K1C9_HUMAN	Keratin, type I cytoskeletal 9 OS=Homo sapiens GN=KRT9 PE=1 SV=3	905	62255	23	19	16	15	4547	1	1	1	926.468	1850.92	2	1850.92	0.001	1	62.95	5.8e-06	K	TLNDMRQEYEQLIAK	N				File4189 Spectrum4256 scans: 7233
7	1	K1C9_HUMAN	Keratin, type I cytoskeletal 9 OS=Homo sapiens GN=KRT9 PE=1 SV=3	905	62255	23	19	16	15	4616	1	1	1	934.465	1866.91	2	1866.91	-0.0001	1	16.22	0.03	K	TLNDMRQEYEQLIAK	N	Oxidation (M)	0.000010000000000.0		File4189 Spectrum2935 scans: 5581
7	1	K1C9_HUMAN	Keratin, type I cytoskeletal 9 OS=Homo sapiens GN=KRT9 PE=1 SV=3	905	62255	23	19	16	15	5434	1	1	1	729.362	2185.06	3	2185.07	-0.0013	2	14.79	0.041	R	MTLDDFRIKFEMEQNLR	Q				File4189 Spectrum5328 scans: 8460
7	1	K1C9_HUMAN	Keratin, type I cytoskeletal 9 OS=Homo sapiens GN=KRT9 PE=1 SV=3	905	62255	23	19	16	15	5473	1	1	1	733.653	2197.94	3	2197.94	-0.0005	1	28.8	0.0015	R	FSSSGGGGGGGRFSSSSGYGGGSSR	V				File4189 Spectrum783 scans: 2828
7	1	K1C9_HUMAN	Keratin, type I cytoskeletal 9 OS=Homo sapiens GN=KRT9 PE=1 SV=3	905	62255	23	19	16	15	5474	1	1	1	1099.98	2197.94	2	2197.94	0.0005	1	5.12	0.35	R	FSSSGGGGGGGRFSSSSGYGGGSSR	V				File4189 Spectrum727 scans: 2757
7	1	K1C9_HUMAN	Keratin, type I cytoskeletal 9 OS=Homo sapiens GN=KRT9 PE=1 SV=3	905	62255	23	19	16	15	5475	1	1	1	733.654	2197.94	3	2197.94	0.0013	1	56.18	3e-06	R	FSSSGGGGGGGRFSSSSGYGGGSSR	V				File4189 Spectrum723 scans: 2753
7	1	K1C9_HUMAN	Keratin, type I cytoskeletal 9 OS=Homo sapiens GN=KRT9 PE=1 SV=3	905	62255	23	19	16	15	6384	1	1	1	837.382	2509.12	3	2509.12	-0.0006	0	1.59	2.2	K	EIETYHNLLEGGQEDFESSGAGK	I				File4189 Spectrum3713 scans: 6590
7	1	K1C9_HUMAN	Keratin, type I cytoskeletal 9 OS=Homo sapiens GN=KRT9 PE=1 SV=3	905	62255	23	19	16	15	6836	1	1	1	902.391	2704.15	3	2704.15	-0.0015	0	56.87	2.9e-06	R	GGGGSFGYSYGGGSGGGFSASSLGGGFGGGSR	G				File4189 Spectrum4328 scans: 7319
7	1	K1C9_HUMAN	Keratin, type I cytoskeletal 9 OS=Homo sapiens GN=KRT9 PE=1 SV=3	905	62255	23	19	16	15	6837	1	1	1	1353.08	2704.15	2	2704.15	-0.0007	0	138.79	1.9e-14	R	GGGGSFGYSYGGGSGGGFSASSLGGGFGGGSR	G				File4189 Spectrum4325 scans: 7315
7	1	K1C9_HUMAN	Keratin, type I cytoskeletal 9 OS=Homo sapiens GN=KRT9 PE=1 SV=3	905	62255	23	19	16	15	7257	1	1	1	968.141	2901.4	3	2901.4	-0.0008	1	68.25	4e-07	K	NYSPYYNTIDDLKDQIVDLTVGNNK	T				File4189 Spectrum6999 scans: 10356
7	1	K1C9_HUMAN	Keratin, type I cytoskeletal 9 OS=Homo sapiens GN=KRT9 PE=1 SV=3	905	62255	23	19	16	15	7841	1	1	1	1075.1	3222.27	3	3222.27	-0.0018	0	140.47	9e-15	R	GGSGGSHGGGSGFGGESGGSYGGGEEASGSGGGYGGGSGK	S				File4189 Spectrum964 scans: 3048
7	1	K1C9_HUMAN	Keratin, type I cytoskeletal 9 OS=Homo sapiens GN=KRT9 PE=1 SV=3	905	62255	23	19	16	15	8947	1	1	1	1315.32	3942.94	3	3942.95	-0.0052	2	0.15	0.97	K	NYSPYYNTIDDLKDQIVDLTVGNNKTLLDIDNTR	M				File4189 Spectrum7544 scans: 10985
7	1	K1C9_HUMAN	Keratin, type I cytoskeletal 9 OS=Homo sapiens GN=KRT9 PE=1 SV=3	905	62255	23	19	16	15	8949	1	1	1	986.744	3942.95	4	3942.95	-0.0015	2	70.29	2.6e-07	K	NYSPYYNTIDDLKDQIVDLTVGNNKTLLDIDNTR	M				File4189 Spectrum7512 scans: 10948
7	1	K1C9_HUMAN	Keratin, type I cytoskeletal 9 OS=Homo sapiens GN=KRT9 PE=1 SV=3	905	62255	23	19	16	15	9007	1	1	1	998.486	3989.91	4	3989.91	0.004	1	38.03	0.00027	K	DIENQYETQITQIEHEVSSSGQEVQSSAKEVTQLR	H				File4189 Spectrum6654 scans: 9962
8	1	HSP7C_HUMAN	Heat shock cognate 71 kDa protein OS=Homo sapiens GN=HSPA8 PE=1 SV=1	690	71082	22	21	14	14	2776	1	1	1	418.225	1251.65	3	1251.65	-0.0001	1	36.58	0.0022	K	MKEIAEAYLGK	T				File4189 Spectrum2317 scans: 4776
8	1	HSP7C_HUMAN	Heat shock cognate 71 kDa protein OS=Homo sapiens GN=HSPA8 PE=1 SV=1	690	71082	22	21	14	14	3502	1	1	0	744.354	1486.69	2	1486.69	0.0002	0	49.79	2.1e-05	R	TTPSYVAFTDTER	L				File4189 Spectrum2908 scans: 5546
8	1	HSP7C_HUMAN	Heat shock cognate 71 kDa protein OS=Homo sapiens GN=HSPA8 PE=1 SV=1	690	71082	22	21	14	14	3839	1	1	1	808.897	1615.78	2	1615.78	-0.0005	0	58.09	3.6e-06	K	SFYPEEVSSMVLTK	M				File4189 Spectrum5071 scans: 8171
8	1	HSP7C_HUMAN	Heat shock cognate 71 kDa protein OS=Homo sapiens GN=HSPA8 PE=1 SV=1	690	71082	22	21	14	14	3840	1	1	1	808.898	1615.78	2	1615.78	0.0006	0	34.22	0.00062	K	SFYPEEVSSMVLTK	M				File4189 Spectrum4997 scans: 8087
8	1	HSP7C_HUMAN	Heat shock cognate 71 kDa protein OS=Homo sapiens GN=HSPA8 PE=1 SV=1	690	71082	22	21	14	14	3858	1	1	1	814.459	1626.9	2	1626.91	-0.0012	1	67.58	4.9e-07	R	QATKDAGTIAGLNVLR	I				File4189 Spectrum3325 scans: 6099
8	1	HSP7C_HUMAN	Heat shock cognate 71 kDa protein OS=Homo sapiens GN=HSPA8 PE=1 SV=1	690	71082	22	21	14	14	3859	1	1	1	543.309	1626.91	3	1626.91	-0.0001	1	61.08	4.3e-06	R	QATKDAGTIAGLNVLR	I				File4189 Spectrum3323 scans: 6097
8	1	HSP7C_HUMAN	Heat shock cognate 71 kDa protein OS=Homo sapiens GN=HSPA8 PE=1 SV=1	690	71082	22	21	14	14	3924	1	1	1	825.402	1648.79	2	1648.79	0.0009	0	71.39	2e-07	K	NQVAMNPTNTVFDAK	R				File4189 Spectrum3037 scans: 5725
8	1	HSP7C_HUMAN	Heat shock cognate 71 kDa protein OS=Homo sapiens GN=HSPA8 PE=1 SV=1	690	71082	22	21	14	14	3957	1	1	0	830.451	1658.89	2	1658.89	-0.0002	0	68.9	3.5e-07	R	IINEPTAAAIAYGLDK	K				File4189 Spectrum4402 scans: 7405
8	1	HSP7C_HUMAN	Heat shock cognate 71 kDa protein OS=Homo sapiens GN=HSPA8 PE=1 SV=1	690	71082	22	21	14	14	4306	1	1	1	894.499	1786.98	2	1786.98	0	1	86.31	1.2e-08	R	IINEPTAAAIAYGLDKK	V				File4189 Spectrum3838 scans: 6748
8	1	HSP7C_HUMAN	Heat shock cognate 71 kDa protein OS=Homo sapiens GN=HSPA8 PE=1 SV=1	690	71082	22	21	14	14	4307	1	1	1	596.668	1786.98	3	1786.98	0.0007	1	57.43	5.9e-06	R	IINEPTAAAIAYGLDKK	V				File4189 Spectrum3832 scans: 6740
8	1	HSP7C_HUMAN	Heat shock cognate 71 kDa protein OS=Homo sapiens GN=HSPA8 PE=1 SV=1	690	71082	22	21	14	14	4384	1	1	1	602.637	1804.89	3	1804.89	0.001	1	29.95	0.0016	K	NQVAMNPTNTVFDAKR	L				File4189 Spectrum2559 scans: 5099
8	1	HSP7C_HUMAN	Heat shock cognate 71 kDa protein OS=Homo sapiens GN=HSPA8 PE=1 SV=1	690	71082	22	21	14	14	4894	1	1	1	661.337	1980.99	3	1980.99	-0.0002	0	27.16	0.0028	K	TVTNAVVTVPAYFNDSQR	Q				File4189 Spectrum4160 scans: 7120
8	1	HSP7C_HUMAN	Heat shock cognate 71 kDa protein OS=Homo sapiens GN=HSPA8 PE=1 SV=1	690	71082	22	21	14	14	4895	1	1	1	991.503	1980.99	2	1980.99	0.0011	0	53.57	9.5e-06	K	TVTNAVVTVPAYFNDSQR	Q				File4189 Spectrum4155 scans: 7115
8	1	HSP7C_HUMAN	Heat shock cognate 71 kDa protein OS=Homo sapiens GN=HSPA8 PE=1 SV=1	690	71082	22	21	14	14	5863	1	1	1	580.803	2319.18	4	2319.19	-0.0016	2	3.15	0.51	R	ARFEELNADLFRGTLDPVEK	A				File4189 Spectrum4890 scans: 7963
8	1	HSP7C_HUMAN	Heat shock cognate 71 kDa protein OS=Homo sapiens GN=HSPA8 PE=1 SV=1	690	71082	22	21	14	14	5864	1	1	1	774.069	2319.19	3	2319.19	0.0008	2	13.22	0.057	R	ARFEELNADLFRGTLDPVEK	A				File4189 Spectrum4884 scans: 7957
8	1	HSP7C_HUMAN	Heat shock cognate 71 kDa protein OS=Homo sapiens GN=HSPA8 PE=1 SV=1	690	71082	22	21	14	14	6290	1	1	1	825.433	2473.28	3	2473.27	0.001	2	56.96	4.6e-06	R	LIGDAAKNQVAMNPTNTVFDAKR	L				File4189 Spectrum3119 scans: 5838
8	1	HSP7C_HUMAN	Heat shock cognate 71 kDa protein OS=Homo sapiens GN=HSPA8 PE=1 SV=1	690	71082	22	21	14	14	6967	1	1	1	695.353	2777.38	4	2777.38	-0.0001	2	34.1	0.00063	K	VQVEYKGETKSFYPEEVSSMVLTK	M				File4189 Spectrum4220 scans: 7191
8	1	HSP7C_HUMAN	Heat shock cognate 71 kDa protein OS=Homo sapiens GN=HSPA8 PE=1 SV=1	690	71082	22	21	14	14	7421	1	1	1	1499.23	2996.45	2	2996.45	-0.0043	0	36.93	0.00068	R	TLSSSTQASIEIDSLYEGIDFYTSITR	A				File4189 Spectrum7827 scans: 11320
8	1	HSP7C_HUMAN	Heat shock cognate 71 kDa protein OS=Homo sapiens GN=HSPA8 PE=1 SV=1	690	71082	22	21	14	14	7422	1	1	1	999.825	2996.45	3	2996.45	0.0039	0	51.49	1.5e-05	R	TLSSSTQASIEIDSLYEGIDFYTSITR	A				File4189 Spectrum7817 scans: 11308
8	1	HSP7C_HUMAN	Heat shock cognate 71 kDa protein OS=Homo sapiens GN=HSPA8 PE=1 SV=1	690	71082	22	21	14	14	7423	1	1	1	1499.24	2996.46	2	2996.45	0.0059	0	29.32	0.0018	R	TLSSSTQASIEIDSLYEGIDFYTSITR	A				File4189 Spectrum7888 scans: 11392
8	1	HSP7C_HUMAN	Heat shock cognate 71 kDa protein OS=Homo sapiens GN=HSPA8 PE=1 SV=1	690	71082	22	21	14	14	7424	1	1	1	999.826	2996.46	3	2996.45	0.0063	0	46.41	4.4e-05	R	TLSSSTQASIEIDSLYEGIDFYTSITR	A				File4189 Spectrum7886 scans: 11390
8	1	HSP7C_HUMAN	Heat shock cognate 71 kDa protein OS=Homo sapiens GN=HSPA8 PE=1 SV=1	690	71082	22	21	14	14	7827	1	1	1	804.666	3214.64	4	3214.63	0.0018	2	47.73	3.3e-05	K	MKEIAEAYLGKTVTNAVVTVPAYFNDSQR	Q				File4189 Spectrum5829 scans: 9023
8	2	GRP78_HUMAN	78 kDa glucose-regulated protein OS=Homo sapiens GN=HSPA5 PE=1 SV=2	610	72402	15	15	14	14	3185	1	0	1	456.911	1367.71	3	1367.71	-0.0005	2	26.82	0.0031	K	MKETAEAYLGKK	V				File4189 Spectrum830 scans: 2889
8	2	GRP78_HUMAN	78 kDa glucose-regulated protein OS=Homo sapiens GN=HSPA5 PE=1 SV=2	610	72402	15	15	14	14	3560	1	0	1	756.879	1511.74	2	1511.74	-0.0002	1	51.67	6.6e-05	R	AKFEELNMDLFR	S				File4189 Spectrum4885 scans: 7958
8	2	GRP78_HUMAN	78 kDa glucose-regulated protein OS=Homo sapiens GN=HSPA5 PE=1 SV=2	610	72402	15	15	14	14	3621	1	0	1	768.903	1535.79	2	1535.79	0.0004	0	75.84	7.7e-08	K	TFAPEEISAMVLTK	M				File4189 Spectrum5860 scans: 9061
8	2	GRP78_HUMAN	78 kDa glucose-regulated protein OS=Homo sapiens GN=HSPA5 PE=1 SV=2	610	72402	15	15	14	14	3802	1	0	1	802.936	1603.86	2	1603.86	0.0007	0	51.15	1.6e-05	K	TKPYIQVDIGGGQTK	T				File4189 Spectrum2420 scans: 4908
8	2	GRP78_HUMAN	78 kDa glucose-regulated protein OS=Homo sapiens GN=HSPA5 PE=1 SV=2	610	72402	15	15	14	14	3903	1	0	1	823.439	1644.86	2	1644.86	0.0009	1	81.84	2.1e-08	R	QATKDAGTIAGLNVMR	I				File4189 Spectrum2842 scans: 5460
8	2	GRP78_HUMAN	78 kDa glucose-regulated protein OS=Homo sapiens GN=HSPA5 PE=1 SV=2	610	72402	15	15	14	14	3904	1	0	1	549.295	1644.86	3	1644.86	0.0014	1	42.22	0.00011	R	QATKDAGTIAGLNVMR	I				File4189 Spectrum2856 scans: 5480
8	2	GRP78_HUMAN	78 kDa glucose-regulated protein OS=Homo sapiens GN=HSPA5 PE=1 SV=2	610	72402	15	15	14	14	3957	1	0	0	830.451	1658.89	2	1658.89	-0.0002	0	68.9	3.5e-07	R	IINEPTAAAIAYGLDK	R				File4189 Spectrum4402 scans: 7405
8	2	GRP78_HUMAN	78 kDa glucose-regulated protein OS=Homo sapiens GN=HSPA5 PE=1 SV=2	610	72402	15	15	14	14	4408	1	0	1	606.004	1814.99	3	1814.99	0.0002	1	79.46	3.5e-08	R	IINEPTAAAIAYGLDKR	E				File4189 Spectrum3987 scans: 6922
8	2	GRP78_HUMAN	78 kDa glucose-regulated protein OS=Homo sapiens GN=HSPA5 PE=1 SV=2	610	72402	15	15	14	14	4500	1	0	1	918.97	1835.93	2	1835.93	-0.0009	0	80.75	2.7e-08	K	SQIFSTASDNQPTVTIK	V				File4189 Spectrum3107 scans: 5823
8	2	GRP78_HUMAN	78 kDa glucose-regulated protein OS=Homo sapiens GN=HSPA5 PE=1 SV=2	610	72402	15	15	14	14	4670	1	0	1	944.49	1886.96	2	1886.96	0.0007	0	49.04	0.00013	K	VTHAVVTVPAYFNDAQR	Q				File4189 Spectrum3441 scans: 6248
8	2	GRP78_HUMAN	78 kDa glucose-regulated protein OS=Homo sapiens GN=HSPA5 PE=1 SV=2	610	72402	15	15	14	14	5392	1	0	1	1083	2163.98	2	2163.98	-0.0006	0	106.21	1.1e-10	R	IEIESFYEGEDFSETLTR	A				File4189 Spectrum5741 scans: 8923
8	2	GRP78_HUMAN	78 kDa glucose-regulated protein OS=Homo sapiens GN=HSPA5 PE=1 SV=2	610	72402	15	15	14	14	5565	1	0	1	745.727	2234.16	3	2234.16	0.0003	1	17.11	0.025	R	ITPSYVAFTPEGERLIGDAAK	N				File4189 Spectrum4610 scans: 7643
8	2	GRP78_HUMAN	78 kDa glucose-regulated protein OS=Homo sapiens GN=HSPA5 PE=1 SV=2	610	72402	15	15	14	14	6319	1	0	1	830.11	2487.31	3	2487.31	0.0015	2	39.69	0.00019	K	VLEDSDLKKSDIDEIVLVGGSTR	I				File4189 Spectrum4070 scans: 7016
8	2	GRP78_HUMAN	78 kDa glucose-regulated protein OS=Homo sapiens GN=HSPA5 PE=1 SV=2	610	72402	15	15	14	14	7688	1	0	1	781.416	3121.64	4	3121.64	-0.001	1	48.13	3.1e-05	K	TKPYIQVDIGGGQTKTFAPEEISAMVLTK	M				File4189 Spectrum5848 scans: 9046
8	2	GRP78_HUMAN	78 kDa glucose-regulated protein OS=Homo sapiens GN=HSPA5 PE=1 SV=2	610	72402	15	15	14	14	7714	1	0	1	786.629	3142.49	4	3142.48	0.0015	1	29.43	0.0017	R	ALSSQHQARIEIESFYEGEDFSETLTR	A				File4189 Spectrum4865 scans: 7936
8	3	HSP71_HUMAN	Heat shock 70 kDa protein 1A/1B OS=Homo sapiens GN=HSPA1A PE=1 SV=5	533	70294	15	12	10	9	3502	1	0	0	744.354	1486.69	2	1486.69	0.0002	0	49.79	2.1e-05	R	TTPSYVAFTDTER	L				File4189 Spectrum2908 scans: 5546
8	3	HSP71_HUMAN	Heat shock 70 kDa protein 1A/1B OS=Homo sapiens GN=HSPA1A PE=1 SV=5	533	70294	15	12	10	9	3635	1	0	1	771.872	1541.73	2	1541.73	0.0004	1	40.74	0.00015	R	ARFEELCSDLFR	S				File4189 Spectrum4210 scans: 7179
8	3	HSP71_HUMAN	Heat shock 70 kDa protein 1A/1B OS=Homo sapiens GN=HSPA1A PE=1 SV=5	533	70294	15	12	10	9	3828	1	0	1	807.908	1613.8	2	1613.8	-0.0002	0	6.27	0.26	K	AFYPEEISSMVLTK	M				File4189 Spectrum5919 scans: 9126
8	3	HSP71_HUMAN	Heat shock 70 kDa protein 1A/1B OS=Homo sapiens GN=HSPA1A PE=1 SV=5	533	70294	15	12	10	9	3829	1	0	1	807.908	1613.8	2	1613.8	0.001	0	54.51	7.7e-06	K	AFYPEEISSMVLTK	M				File4189 Spectrum5861 scans: 9062
8	3	HSP71_HUMAN	Heat shock 70 kDa protein 1A/1B OS=Homo sapiens GN=HSPA1A PE=1 SV=5	533	70294	15	12	10	9	3855	1	0	1	542.649	1624.93	3	1624.93	0.0006	1	48.87	5.3e-05	R	QATKDAGVIAGLNVLR	I				File4189 Spectrum3880 scans: 6798
8	3	HSP71_HUMAN	Heat shock 70 kDa protein 1A/1B OS=Homo sapiens GN=HSPA1A PE=1 SV=5	533	70294	15	12	10	9	4022	1	0	1	844.454	1686.89	2	1686.89	-0.0011	0	80.1	3.3e-08	R	IINEPTAAAIAYGLDR	T				File4189 Spectrum4543 scans: 7564
8	3	HSP71_HUMAN	Heat shock 70 kDa protein 1A/1B OS=Homo sapiens GN=HSPA1A PE=1 SV=5	533	70294	15	12	10	9	4405	1	0	1	605.655	1813.94	3	1813.94	0.0003	1	47.3	3.7e-05	K	NQVALNPQNTVFDAKR	L				File4189 Spectrum2720 scans: 5302
8	3	HSP71_HUMAN	Heat shock 70 kDa protein 1A/1B OS=Homo sapiens GN=HSPA1A PE=1 SV=5	533	70294	15	12	10	9	7378	1	0	1	994.492	2980.45	3	2980.46	-0.0021	0	54.09	3.6e-05	R	TLSSSTQASLEIDSLFEGIDFYTSITR	A				File4189 Spectrum8858 scans: 12550
8	3	HSP71_HUMAN	Heat shock 70 kDa protein 1A/1B OS=Homo sapiens GN=HSPA1A PE=1 SV=5	533	70294	15	12	10	9	7379	1	0	1	994.492	2980.46	3	2980.46	0.0001	0	76.59	1.9e-07	R	TLSSSTQASLEIDSLFEGIDFYTSITR	A				File4189 Spectrum8912 scans: 12620
8	3	HSP71_HUMAN	Heat shock 70 kDa protein 1A/1B OS=Homo sapiens GN=HSPA1A PE=1 SV=5	533	70294	15	12	10	9	7380	1	0	1	1491.24	2980.46	2	2980.46	0.0045	0	117.45	1.6e-11	R	TLSSSTQASLEIDSLFEGIDFYTSITR	A				File4189 Spectrum8872 scans: 12569
8	3	HSP71_HUMAN	Heat shock 70 kDa protein 1A/1B OS=Homo sapiens GN=HSPA1A PE=1 SV=5	533	70294	15	12	10	9	7381	1	0	1	1491.24	2980.46	2	2980.46	0.0064	0	52.54	5e-05	R	TLSSSTQASLEIDSLFEGIDFYTSITR	A				File4189 Spectrum8928 scans: 12640
8	3	HSP71_HUMAN	Heat shock 70 kDa protein 1A/1B OS=Homo sapiens GN=HSPA1A PE=1 SV=5	533	70294	15	12	10	9	7382	1	0	1	994.497	2980.47	3	2980.46	0.0126	0	8.93	0.25	R	TLSSSTQASLEIDSLFEGIDFYTSITR	A				File4189 Spectrum8985 scans: 12717
8	3	HSP71_HUMAN	Heat shock 70 kDa protein 1A/1B OS=Homo sapiens GN=HSPA1A PE=1 SV=5	533	70294	15	12	10	9	7711	1	0	1	1046.53	3136.56	3	3136.56	-0.0003	1	6.36	0.25	K	RTLSSSTQASLEIDSLFEGIDFYTSITR	A				File4189 Spectrum8088 scans: 11614
8	3	HSP71_HUMAN	Heat shock 70 kDa protein 1A/1B OS=Homo sapiens GN=HSPA1A PE=1 SV=5	533	70294	15	12	10	9	7898	1	0	1	1087.55	3259.62	3	3259.62	0.0005	1	80.27	6.6e-08	K	MKEIAEAYLGYPVTNAVITVPAYFNDSQR	Q				File4189 Spectrum6533 scans: 9831
8	3	HSP71_HUMAN	Heat shock 70 kDa protein 1A/1B OS=Homo sapiens GN=HSPA1A PE=1 SV=5	533	70294	15	12	10	9	8313	1	0	1	1176.59	3526.76	3	3526.76	0.0011	1	35.61	0.00046	R	NSTIPTKQTQIFTTYSDNQPGVLIQVYEGER	A				File4189 Spectrum5440 scans: 8585
8		HSP72_HUMAN	Heat shock-related 70 kDa protein 2 OS=Homo sapiens GN=HSPA2 PE=1 SV=1	209	70263	4	4	3	3	3502	1	0	0	744.354	1486.69	2	1486.69	0.0002	0	49.79	2.1e-05	R	TTPSYVAFTDTER	L				File4189 Spectrum2908 scans: 5546
8		HSP72_HUMAN	Heat shock-related 70 kDa protein 2 OS=Homo sapiens GN=HSPA2 PE=1 SV=1	209	70263	4	4	3	3	3957	1	0	0	830.451	1658.89	2	1658.89	-0.0002	0	68.9	3.5e-07	R	IINEPTAAAIAYGLDK	K				File4189 Spectrum4402 scans: 7405
8		HSP72_HUMAN	Heat shock-related 70 kDa protein 2 OS=Homo sapiens GN=HSPA2 PE=1 SV=1	209	70263	4	4	3	3	4306	1	0	1	894.499	1786.98	2	1786.98	0	1	86.31	1.2e-08	R	IINEPTAAAIAYGLDKK	G				File4189 Spectrum3838 scans: 6748
8		HSP72_HUMAN	Heat shock-related 70 kDa protein 2 OS=Homo sapiens GN=HSPA2 PE=1 SV=1	209	70263	4	4	3	3	4307	1	0	1	596.668	1786.98	3	1786.98	0.0007	1	57.43	5.9e-06	R	IINEPTAAAIAYGLDKK	G				File4189 Spectrum3832 scans: 6740
8		HS71L_HUMAN	Heat shock 70 kDa protein 1-like OS=Homo sapiens GN=HSPA1L PE=1 SV=2	191	70730	6	5	5	5	3502	1	0	0	744.354	1486.69	2	1486.69	0.0002	0	49.79	2.1e-05	R	TTPSYVAFTDTER	L				File4189 Spectrum2908 scans: 5546
8		HS71L_HUMAN	Heat shock 70 kDa protein 1-like OS=Homo sapiens GN=HSPA1L PE=1 SV=2	191	70730	6	5	5	5	3828	1	0	1	807.908	1613.8	2	1613.8	-0.0002	0	6.27	0.26	K	AFYPEEISSMVLTK	L				File4189 Spectrum5919 scans: 9126
8		HS71L_HUMAN	Heat shock 70 kDa protein 1-like OS=Homo sapiens GN=HSPA1L PE=1 SV=2	191	70730	6	5	5	5	3829	1	0	1	807.908	1613.8	2	1613.8	0.001	0	54.51	7.7e-06	K	AFYPEEISSMVLTK	L				File4189 Spectrum5861 scans: 9062
8		HS71L_HUMAN	Heat shock 70 kDa protein 1-like OS=Homo sapiens GN=HSPA1L PE=1 SV=2	191	70730	6	5	5	5	3855	1	0	1	542.649	1624.93	3	1624.93	0.0006	1	48.87	5.3e-05	R	QATKDAGVIAGLNVLR	I				File4189 Spectrum3880 scans: 6798
8		HS71L_HUMAN	Heat shock 70 kDa protein 1-like OS=Homo sapiens GN=HSPA1L PE=1 SV=2	191	70730	6	5	5	5	3957	1	0	0	830.451	1658.89	2	1658.89	-0.0002	0	68.9	3.5e-07	R	IINEPTAAAIAYGLDK	G				File4189 Spectrum4402 scans: 7405
8		HS71L_HUMAN	Heat shock 70 kDa protein 1-like OS=Homo sapiens GN=HSPA1L PE=1 SV=2	191	70730	6	5	5	5	8313	1	0	1	1176.59	3526.76	3	3526.76	0.0011	1	35.61	0.00046	R	NSTIPTKQTQIFTTYSDNQPGVLIQVYEGER	A				File4189 Spectrum5440 scans: 8585
8		HSP76_HUMAN	Heat shock 70 kDa protein 6 OS=Homo sapiens GN=HSPA6 PE=1 SV=2	149	71440	8	5	4	4	3502	1	0	0	744.354	1486.69	2	1486.69	0.0002	0	49.79	2.1e-05	R	TTPSYVAFTDTER	L				File4189 Spectrum2908 scans: 5546
8		HSP76_HUMAN	Heat shock 70 kDa protein 6 OS=Homo sapiens GN=HSPA6 PE=1 SV=2	149	71440	8	5	4	4	3635	1	0	1	771.872	1541.73	2	1541.73	0.0004	1	40.74	0.00015	R	ARFEELCSDLFR	S				File4189 Spectrum4210 scans: 7179
8		HSP76_HUMAN	Heat shock 70 kDa protein 6 OS=Homo sapiens GN=HSPA6 PE=1 SV=2	149	71440	8	5	4	4	4022	1	0	1	844.454	1686.89	2	1686.89	-0.0011	0	80.1	3.3e-08	R	IINEPTAAAIAYGLDR	R				File4189 Spectrum4543 scans: 7564
8		HSP76_HUMAN	Heat shock 70 kDa protein 6 OS=Homo sapiens GN=HSPA6 PE=1 SV=2	149	71440	8	5	4	4	7378	2	0	1	994.492	2980.45	3	2980.46	-0.0021	0	18.89	0.12	R	TLSSSTQATLEIDSLFEGVDFYTSITR	A				File4189 Spectrum8858 scans: 12550
8		HSP76_HUMAN	Heat shock 70 kDa protein 6 OS=Homo sapiens GN=HSPA6 PE=1 SV=2	149	71440	8	5	4	4	7379	2	0	1	994.492	2980.46	3	2980.46	0.0001	0	24.65	0.03	R	TLSSSTQATLEIDSLFEGVDFYTSITR	A				File4189 Spectrum8912 scans: 12620
8		HSP76_HUMAN	Heat shock 70 kDa protein 6 OS=Homo sapiens GN=HSPA6 PE=1 SV=2	149	71440	8	5	4	4	7380	2	0	1	1491.24	2980.46	2	2980.46	0.0045	0	28.13	0.014	R	TLSSSTQATLEIDSLFEGVDFYTSITR	A				File4189 Spectrum8872 scans: 12569
8		HSP76_HUMAN	Heat shock 70 kDa protein 6 OS=Homo sapiens GN=HSPA6 PE=1 SV=2	149	71440	8	5	4	4	7381	2	0	1	1491.24	2980.46	2	2980.46	0.0064	0	6.92	1.8	R	TLSSSTQATLEIDSLFEGVDFYTSITR	A				File4189 Spectrum8928 scans: 12640
8		HSP76_HUMAN	Heat shock 70 kDa protein 6 OS=Homo sapiens GN=HSPA6 PE=1 SV=2	149	71440	8	5	4	4	7382	2	0	1	994.497	2980.47	3	2980.46	0.0126	0	2.32	1.1	R	TLSSSTQATLEIDSLFEGVDFYTSITR	A				File4189 Spectrum8985 scans: 12717
8		HSP77_HUMAN	Putative heat shock 70 kDa protein 7 OS=Homo sapiens GN=HSPA7 PE=5 SV=2	75	40448	2	2	2	2	3502	1	0	0	744.354	1486.69	2	1486.69	0.0002	0	49.79	2.1e-05	R	TTPSYVAFTDTER	L				File4189 Spectrum2908 scans: 5546
8		HSP77_HUMAN	Putative heat shock 70 kDa protein 7 OS=Homo sapiens GN=HSPA7 PE=5 SV=2	75	40448	2	2	2	2	3635	1	0	1	771.872	1541.73	2	1541.73	0.0004	1	40.74	0.00015	R	ARFEELCSDLFR	S				File4189 Spectrum4210 scans: 7179
9	1	THOC4_HUMAN	THO complex subunit 4 OS=Homo sapiens GN=ALYREF PE=1 SV=3	645	26872	12	12	6	6	5027	1	1	1	678.995	2033.96	3	2033.97	-0.0015	0	49.34	2.4e-05	K	QQLSAEELDAQLDAYNAR	M				File4189 Spectrum3974 scans: 6906
9	1	THOC4_HUMAN	THO complex subunit 4 OS=Homo sapiens GN=ALYREF PE=1 SV=3	645	26872	12	12	6	6	5028	1	1	1	1017.99	2033.97	2	2033.97	0.0008	0	110.72	4.2e-11	K	QQLSAEELDAQLDAYNAR	M				File4189 Spectrum3965 scans: 6896
9	1	THOC4_HUMAN	THO complex subunit 4 OS=Homo sapiens GN=ALYREF PE=1 SV=3	645	26872	12	12	6	6	5029	1	1	1	1017.99	2033.97	2	2033.97	0.0012	0	93.83	1.6e-09	K	QQLSAEELDAQLDAYNAR	M				File4189 Spectrum4035 scans: 6976
9	1	THOC4_HUMAN	THO complex subunit 4 OS=Homo sapiens GN=ALYREF PE=1 SV=3	645	26872	12	12	6	6	5970	1	1	1	788.719	2363.14	3	2363.14	-0.0001	1	90.63	5.1e-09	R	NSKQQLSAEELDAQLDAYNAR	M				File4189 Spectrum3465 scans: 6277
9	1	THOC4_HUMAN	THO complex subunit 4 OS=Homo sapiens GN=ALYREF PE=1 SV=3	645	26872	12	12	6	6	5971	1	1	1	1182.58	2363.14	2	2363.14	0.0006	1	116.87	1.4e-11	R	NSKQQLSAEELDAQLDAYNAR	M				File4189 Spectrum3467 scans: 6279
9	1	THOC4_HUMAN	THO complex subunit 4 OS=Homo sapiens GN=ALYREF PE=1 SV=3	645	26872	12	12	6	6	6273	1	1	1	823.714	2468.12	3	2468.11	0.0067	1	31.56	0.0034	K	QQLSAEELDAQLDAYNARMDTS	-				File4189 Spectrum4561 scans: 7584
9	1	THOC4_HUMAN	THO complex subunit 4 OS=Homo sapiens GN=ALYREF PE=1 SV=3	645	26872	12	12	6	6	6274	1	1	1	1235.07	2468.12	2	2468.11	0.0084	1	85.42	1.4e-08	K	QQLSAEELDAQLDAYNARMDTS	-				File4189 Spectrum4571 scans: 7596
9	1	THOC4_HUMAN	THO complex subunit 4 OS=Homo sapiens GN=ALYREF PE=1 SV=3	645	26872	12	12	6	6	7031	1	1	1	933.434	2797.28	3	2797.28	-0.0016	2	80.06	3.1e-08	R	NSKQQLSAEELDAQLDAYNARMDTS	-				File4189 Spectrum3970 scans: 6902
9	1	THOC4_HUMAN	THO complex subunit 4 OS=Homo sapiens GN=ALYREF PE=1 SV=3	645	26872	12	12	6	6	7130	1	1	1	947.824	2840.45	3	2840.45	0.0023	0	48.19	3.7e-05	K	LLVSNLDFGVSDADIQELFAEFGTLK	K				File4189 Spectrum9375 scans: 13320
9	1	THOC4_HUMAN	THO complex subunit 4 OS=Homo sapiens GN=ALYREF PE=1 SV=3	645	26872	12	12	6	6	7362	1	1	1	990.52	2968.54	3	2968.54	-0.0048	1	34.53	0.00058	K	LLVSNLDFGVSDADIQELFAEFGTLKK	A				File4189 Spectrum8684 scans: 12332
9	1	THOC4_HUMAN	THO complex subunit 4 OS=Homo sapiens GN=ALYREF PE=1 SV=3	645	26872	12	12	6	6	7363	1	1	1	990.521	2968.54	3	2968.54	-0.0007	1	78.1	4.8e-08	K	LLVSNLDFGVSDADIQELFAEFGTLKK	A				File4189 Spectrum8744 scans: 12404
9	1	THOC4_HUMAN	THO complex subunit 4 OS=Homo sapiens GN=ALYREF PE=1 SV=3	645	26872	12	12	6	6	7364	1	1	1	743.143	2968.54	4	2968.54	0.0003	1	19.77	0.014	K	LLVSNLDFGVSDADIQELFAEFGTLKK	A				File4189 Spectrum8735 scans: 12393
10	1	PHB_HUMAN	Prohibitin OS=Homo sapiens GN=PHB PE=1 SV=1	567	29843	14	13	10	9	3247	1	1	1	466.286	1395.84	3	1395.84	0.0003	0	24.37	0.0093	R	ILFRPVASQLPR	I				File4189 Spectrum3440 scans: 6247
10	1	PHB_HUMAN	Prohibitin OS=Homo sapiens GN=PHB PE=1 SV=1	567	29843	14	13	10	9	3810	1	1	1	536.286	1605.84	3	1605.84	-0.0002	1	28.54	0.0021	R	KLEAAEDIAYQLSR	S				File4189 Spectrum3754 scans: 6640
10	1	PHB_HUMAN	Prohibitin OS=Homo sapiens GN=PHB PE=1 SV=1	567	29843	14	13	10	9	3811	1	1	1	803.925	1605.84	2	1605.84	0	1	87.54	8.6e-09	R	KLEAAEDIAYQLSR	S				File4189 Spectrum3759 scans: 6646
10	1	PHB_HUMAN	Prohibitin OS=Homo sapiens GN=PHB PE=1 SV=1	567	29843	14	13	10	9	4583	1	1	1	928.021	1854.03	2	1854.03	0.0015	0	30.27	0.0059	R	NITYLPAGQSVLLQLPQ	-				File4189 Spectrum6520 scans: 9817
10	1	PHB_HUMAN	Prohibitin OS=Homo sapiens GN=PHB PE=1 SV=1	567	29843	14	13	10	9	4928	1	1	1	999.548	1997.08	2	1997.08	0.0022	0	28.54	0.0021	K	AAELIANSLATAGDGLIELR	K				File4189 Spectrum6512 scans: 9807
10	1	PHB_HUMAN	Prohibitin OS=Homo sapiens GN=PHB PE=1 SV=1	567	29843	14	13	10	9	5138	1	1	1	694.395	2080.16	3	2080.16	0.0001	1	39.85	0.00048	R	NVPVITGSKDLQNVNITLR	I				File4189 Spectrum4069 scans: 7015
10	1	PHB_HUMAN	Prohibitin OS=Homo sapiens GN=PHB PE=1 SV=1	567	29843	14	13	10	9	5139	1	1	1	1041.09	2080.17	2	2080.16	0.003	1	110.45	4e-11	R	NVPVITGSKDLQNVNITLR	I				File4189 Spectrum4061 scans: 7005
10	1	PHB_HUMAN	Prohibitin OS=Homo sapiens GN=PHB PE=1 SV=1	567	29843	14	13	10	9	5183	1	1	1	1049.59	2097.16	2	2097.16	0.0028	1	101.34	3.8e-10	R	SRNITYLPAGQSVLLQLPQ	-				File4189 Spectrum5850 scans: 9048
10	1	PHB_HUMAN	Prohibitin OS=Homo sapiens GN=PHB PE=1 SV=1	567	29843	14	13	10	9	6691	1	1	1	880.465	2638.37	3	2638.37	-0.0003	1	28.94	0.0019	R	IFTSIGEDYDERVLPSITTEILK	S				File4189 Spectrum6518 scans: 9815
10	1	PHB_HUMAN	Prohibitin OS=Homo sapiens GN=PHB PE=1 SV=1	567	29843	14	13	10	9	7501	1	1	1	1014.21	3039.61	3	3039.61	-0.0018	1	98.97	5.3e-10	K	AAIISAEGDSKAAELIANSLATAGDGLIELR	K				File4189 Spectrum7738 scans: 11219
10	1	PHB_HUMAN	Prohibitin OS=Homo sapiens GN=PHB PE=1 SV=1	567	29843	14	13	10	9	7502	1	1	1	760.909	3039.61	4	3039.61	0.0004	1	64.43	1.8e-06	K	AAIISAEGDSKAAELIANSLATAGDGLIELR	K				File4189 Spectrum7724 scans: 11202
10	1	PHB_HUMAN	Prohibitin OS=Homo sapiens GN=PHB PE=1 SV=1	567	29843	14	13	10	9	7503	1	1	1	1014.21	3039.61	3	3039.61	0.0013	1	111.88	3.2e-11	K	AAIISAEGDSKAAELIANSLATAGDGLIELR	K				File4189 Spectrum7711 scans: 11187
10	1	PHB_HUMAN	Prohibitin OS=Homo sapiens GN=PHB PE=1 SV=1	567	29843	14	13	10	9	7701	1	1	1	783.672	3130.66	4	3130.66	0.003	1	8.88	0.5	K	VFESIGKFGLALAVAGGVVNSALYNVDAGHR	A				File4189 Spectrum8195 scans: 11739
10	1	PHB_HUMAN	Prohibitin OS=Homo sapiens GN=PHB PE=1 SV=1	567	29843	14	13	10	9	7746	1	1	1	792.933	3167.7	4	3167.7	-0.0026	2	26.18	0.0086	K	KAAIISAEGDSKAAELIANSLATAGDGLIELR	K				File4189 Spectrum7246 scans: 10638
11	1	H13_HUMAN	Histone H1.3 OS=Homo sapiens GN=HIST1H1D PE=1 SV=2	541	22336	18	13	9	8	726	1	1	1	421.758	841.502	2	841.502	0	1	4.42	0.97	K	VAGAATPKK	S				File4189 Spectrum1831 scans: 4135
11	1	H13_HUMAN	Histone H1.3 OS=Homo sapiens GN=HIST1H1D PE=1 SV=2	541	22336	18	13	9	8	729	1	1	1	421.758	841.502	2	841.502	0.0002	1	5.12	0.33	K	VAGAATPKK	S				File4189 Spectrum2011 scans: 4380
11	1	H13_HUMAN	Histone H1.3 OS=Homo sapiens GN=HIST1H1D PE=1 SV=2	541	22336	18	13	9	8	730	1	1	1	421.759	841.503	2	841.502	0.0004	1	8.9	0.49	K	VAGAATPKK	S				File4189 Spectrum1964 scans: 4317
11	1	H13_HUMAN	Histone H1.3 OS=Homo sapiens GN=HIST1H1D PE=1 SV=2	541	22336	18	13	9	8	731	1	1	1	421.759	841.503	2	841.502	0.0009	1	9	0.49	K	VAGAATPKK	S				File4189 Spectrum1885 scans: 4200
11	1	H13_HUMAN	Histone H1.3 OS=Homo sapiens GN=HIST1H1D PE=1 SV=2	541	22336	18	13	9	8	732	1	1	1	421.759	841.504	2	841.502	0.0015	1	9.05	0.48	K	VAGAATPKK	S				File4189 Spectrum1919 scans: 4255
11	1	H13_HUMAN	Histone H1.3 OS=Homo sapiens GN=HIST1H1D PE=1 SV=2	541	22336	18	13	9	8	1412	1	1	1	487.306	972.597	2	972.597	0.0001	1	54.96	1.1e-05	R	SGVSLAALKK	A				File4189 Spectrum1731 scans: 4004
11	1	H13_HUMAN	Histone H1.3 OS=Homo sapiens GN=HIST1H1D PE=1 SV=2	541	22336	18	13	9	8	2403	1	0	0	389.544	1165.61	3	1165.61	0.0002	1	33.42	0.0013	K	GTGASGSFKLNK	K				File4189 Spectrum734 scans: 2766
11	1	H13_HUMAN	Histone H1.3 OS=Homo sapiens GN=HIST1H1D PE=1 SV=2	541	22336	18	13	9	8	2547	1	1	1	599.838	1197.66	2	1197.66	0.0007	0	74.8	9.7e-08	K	ASGPPVSELITK	A				File4189 Spectrum2945 scans: 5595
11	1	H13_HUMAN	Histone H1.3 OS=Homo sapiens GN=HIST1H1D PE=1 SV=2	541	22336	18	13	9	8	2812	1	1	0	630.88	1259.74	2	1259.74	0.0001	1	47.03	5.6e-05	K	SLVSKGTLVQTK	G				File4189 Spectrum1306 scans: 3473
11	1	H13_HUMAN	Histone H1.3 OS=Homo sapiens GN=HIST1H1D PE=1 SV=2	541	22336	18	13	9	8	2813	1	1	0	420.923	1259.75	3	1259.74	0.0015	1	60.04	2.7e-06	K	SLVSKGTLVQTK	G				File4189 Spectrum1315 scans: 3483
11	1	H13_HUMAN	Histone H1.3 OS=Homo sapiens GN=HIST1H1D PE=1 SV=2	541	22336	18	13	9	8	3071	1	1	1	442.926	1325.76	3	1325.76	0	1	52.61	1.2e-05	R	KASGPPVSELITK	A				File4189 Spectrum2231 scans: 4665
11	1	H13_HUMAN	Histone H1.3 OS=Homo sapiens GN=HIST1H1D PE=1 SV=2	541	22336	18	13	9	8	3072	1	1	1	663.885	1325.76	2	1325.76	0.0003	1	60	2.4e-06	R	KASGPPVSELITK	A				File4189 Spectrum2200 scans: 4625
11	1	H13_HUMAN	Histone H1.3 OS=Homo sapiens GN=HIST1H1D PE=1 SV=2	541	22336	18	13	9	8	3073	1	1	1	663.885	1325.76	2	1325.76	0.0003	1	69.41	4.1e-07	R	KASGPPVSELITK	A				File4189 Spectrum2256 scans: 4697
11	1	H13_HUMAN	Histone H1.3 OS=Homo sapiens GN=HIST1H1D PE=1 SV=2	541	22336	18	13	9	8	3741	1	1	1	789.896	1577.78	2	1577.78	-0.0018	1	78.56	4.3e-08	K	ALAAAGYDVEKNNSR	I				File4189 Spectrum1078 scans: 3187
11	1	H13_HUMAN	Histone H1.3 OS=Homo sapiens GN=HIST1H1D PE=1 SV=2	541	22336	18	13	9	8	3742	1	1	1	526.933	1577.78	3	1577.78	-0.0015	1	50.71	1.8e-05	K	ALAAAGYDVEKNNSR	I				File4189 Spectrum1074 scans: 3181
11	1	H13_HUMAN	Histone H1.3 OS=Homo sapiens GN=HIST1H1D PE=1 SV=2	541	22336	18	13	9	8	3743	1	1	1	789.896	1577.78	2	1577.78	-0.0013	1	72.16	1.7e-07	K	ALAAAGYDVEKNNSR	I				File4189 Spectrum1133 scans: 3258
11	1	H13_HUMAN	Histone H1.3 OS=Homo sapiens GN=HIST1H1D PE=1 SV=2	541	22336	18	13	9	8	4068	1	1	1	569.632	1705.88	3	1705.87	0.0003	2	60.31	2.2e-06	K	KALAAAGYDVEKNNSR	I				File4189 Spectrum633 scans: 2638
11	1	H13_HUMAN	Histone H1.3 OS=Homo sapiens GN=HIST1H1D PE=1 SV=2	541	22336	18	13	9	8	4436	1	1	1	607.327	1818.96	3	1818.96	-0.0001	2	28.22	0.0033	K	ALAAAGYDVEKNNSRIK	L				File4189 Spectrum1370 scans: 3550
11	2	H15_HUMAN	Histone H1.5 OS=Homo sapiens GN=HIST1H1B PE=1 SV=3	229	22566	8	8	5	5	2403	1	0	0	389.544	1165.61	3	1165.61	0.0002	1	33.42	0.0013	K	GTGASGSFKLNK	K				File4189 Spectrum734 scans: 2766
11	2	H15_HUMAN	Histone H1.5 OS=Homo sapiens GN=HIST1H1B PE=1 SV=3	229	22566	8	8	5	5	2607	1	0	1	606.845	1211.67	2	1211.68	-0.0012	0	30.76	0.0017	K	ATGPPVSELITK	A				File4189 Spectrum3036 scans: 5724
11	2	H15_HUMAN	Histone H1.5 OS=Homo sapiens GN=HIST1H1B PE=1 SV=3	229	22566	8	8	5	5	2608	1	0	1	606.846	1211.68	2	1211.68	0.0002	0	30.26	0.0015	K	ATGPPVSELITK	A				File4189 Spectrum3023 scans: 5705
11	2	H15_HUMAN	Histone H1.5 OS=Homo sapiens GN=HIST1H1B PE=1 SV=3	229	22566	8	8	5	5	2812	1	0	0	630.88	1259.74	2	1259.74	0.0001	1	47.03	5.6e-05	K	SLVSKGTLVQTK	G				File4189 Spectrum1306 scans: 3473
11	2	H15_HUMAN	Histone H1.5 OS=Homo sapiens GN=HIST1H1B PE=1 SV=3	229	22566	8	8	5	5	2813	1	0	0	420.923	1259.75	3	1259.74	0.0015	1	60.04	2.7e-06	K	SLVSKGTLVQTK	G				File4189 Spectrum1315 scans: 3483
11	2	H15_HUMAN	Histone H1.5 OS=Homo sapiens GN=HIST1H1B PE=1 SV=3	229	22566	8	8	5	5	3110	1	0	1	670.893	1339.77	2	1339.77	0.0008	1	24.33	0.0052	R	KATGPPVSELITK	A				File4189 Spectrum2345 scans: 4811
11	2	H15_HUMAN	Histone H1.5 OS=Homo sapiens GN=HIST1H1B PE=1 SV=3	229	22566	8	8	5	5	3710	1	0	1	782.889	1563.76	2	1563.76	0.0001	1	60.7	2e-06	K	ALAAGGYDVEKNNSR	I				File4189 Spectrum897 scans: 2968
11	2	H15_HUMAN	Histone H1.5 OS=Homo sapiens GN=HIST1H1B PE=1 SV=3	229	22566	8	8	5	5	3711	1	0	1	522.262	1563.76	3	1563.76	0.0003	1	53.07	1.1e-05	K	ALAAGGYDVEKNNSR	I				File4189 Spectrum873 scans: 2940
11		H11_HUMAN	Histone H1.1 OS=Homo sapiens GN=HIST1H1A PE=1 SV=3	314	21829	8	8	5	5	2403	1	0	0	389.544	1165.61	3	1165.61	0.0002	1	33.42	0.0013	K	GTGASGSFKLNK	K				File4189 Spectrum734 scans: 2766
11		H11_HUMAN	Histone H1.1 OS=Homo sapiens GN=HIST1H1A PE=1 SV=3	314	21829	8	8	5	5	2812	1	0	0	630.88	1259.74	2	1259.74	0.0001	1	47.03	5.6e-05	K	SLVSKGTLVQTK	G				File4189 Spectrum1306 scans: 3473
11		H11_HUMAN	Histone H1.1 OS=Homo sapiens GN=HIST1H1A PE=1 SV=3	314	21829	8	8	5	5	2813	1	0	0	420.923	1259.75	3	1259.74	0.0015	1	60.04	2.7e-06	K	SLVSKGTLVQTK	G				File4189 Spectrum1315 scans: 3483
11		H11_HUMAN	Histone H1.1 OS=Homo sapiens GN=HIST1H1A PE=1 SV=3	314	21829	8	8	5	5	3741	1	0	1	789.896	1577.78	2	1577.78	-0.0018	1	78.56	4.3e-08	K	ALAAAGYDVEKNNSR	I				File4189 Spectrum1078 scans: 3187
11		H11_HUMAN	Histone H1.1 OS=Homo sapiens GN=HIST1H1A PE=1 SV=3	314	21829	8	8	5	5	3742	1	0	1	526.933	1577.78	3	1577.78	-0.0015	1	50.71	1.8e-05	K	ALAAAGYDVEKNNSR	I				File4189 Spectrum1074 scans: 3181
11		H11_HUMAN	Histone H1.1 OS=Homo sapiens GN=HIST1H1A PE=1 SV=3	314	21829	8	8	5	5	3743	1	0	1	789.896	1577.78	2	1577.78	-0.0013	1	72.16	1.7e-07	K	ALAAAGYDVEKNNSR	I				File4189 Spectrum1133 scans: 3258
11		H11_HUMAN	Histone H1.1 OS=Homo sapiens GN=HIST1H1A PE=1 SV=3	314	21829	8	8	5	5	4068	1	0	1	569.632	1705.88	3	1705.87	0.0003	2	60.31	2.2e-06	K	KALAAAGYDVEKNNSR	I				File4189 Spectrum633 scans: 2638
11		H11_HUMAN	Histone H1.1 OS=Homo sapiens GN=HIST1H1A PE=1 SV=3	314	21829	8	8	5	5	4436	1	0	1	607.327	1818.96	3	1818.96	-0.0001	2	28.22	0.0033	K	ALAAAGYDVEKNNSRIK	L				File4189 Spectrum1370 scans: 3550
11		H1T_HUMAN	Histone H1t OS=Homo sapiens GN=HIST1H1T PE=1 SV=4	224	22006	5	5	3	3	3741	1	0	1	789.896	1577.78	2	1577.78	-0.0018	1	78.56	4.3e-08	K	ALAAAGYDVEKNNSR	I				File4189 Spectrum1078 scans: 3187
11		H1T_HUMAN	Histone H1t OS=Homo sapiens GN=HIST1H1T PE=1 SV=4	224	22006	5	5	3	3	3742	1	0	1	526.933	1577.78	3	1577.78	-0.0015	1	50.71	1.8e-05	K	ALAAAGYDVEKNNSR	I				File4189 Spectrum1074 scans: 3181
11		H1T_HUMAN	Histone H1t OS=Homo sapiens GN=HIST1H1T PE=1 SV=4	224	22006	5	5	3	3	3743	1	0	1	789.896	1577.78	2	1577.78	-0.0013	1	72.16	1.7e-07	K	ALAAAGYDVEKNNSR	I				File4189 Spectrum1133 scans: 3258
11		H1T_HUMAN	Histone H1t OS=Homo sapiens GN=HIST1H1T PE=1 SV=4	224	22006	5	5	3	3	4068	1	0	1	569.632	1705.88	3	1705.87	0.0003	2	60.31	2.2e-06	K	KALAAAGYDVEKNNSR	I				File4189 Spectrum633 scans: 2638
11		H1T_HUMAN	Histone H1t OS=Homo sapiens GN=HIST1H1T PE=1 SV=4	224	22006	5	5	3	3	4436	1	0	1	607.327	1818.96	3	1818.96	-0.0001	2	28.22	0.0033	K	ALAAAGYDVEKNNSRIK	L				File4189 Spectrum1370 scans: 3550
12	1	AT1A1_HUMAN	Sodium/potassium-transporting ATPase subunit alpha-1 OS=Homo sapiens GN=ATP1A1 PE=1 SV=1	508	114135	12	12	11	11	1986	1	1	1	544.3	1086.59	2	1086.59	0.0002	0	28.05	0.0023	K	LIIVEGCQR	Q				File4189 Spectrum2034 scans: 4409
12	1	AT1A1_HUMAN	Sodium/potassium-transporting ATPase subunit alpha-1 OS=Homo sapiens GN=ATP1A1 PE=1 SV=1	508	114135	12	12	11	11	2679	1	1	1	616.33	1230.65	2	1230.65	-0.0001	0	62.92	1.4e-06	R	AVAGDASESALLK	C				File4189 Spectrum2039 scans: 4415
12	1	AT1A1_HUMAN	Sodium/potassium-transporting ATPase subunit alpha-1 OS=Homo sapiens GN=ATP1A1 PE=1 SV=1	508	114135	12	12	11	11	2700	1	1	1	618.856	1235.7	2	1235.7	-0.0006	0	58.86	3.9e-06	R	LNIPVSQVNPR	D				File4189 Spectrum2696 scans: 5268
12	1	AT1A1_HUMAN	Sodium/potassium-transporting ATPase subunit alpha-1 OS=Homo sapiens GN=ATP1A1 PE=1 SV=1	508	114135	12	12	11	11	3752	1	1	1	792.941	1583.87	2	1583.87	0.001	0	56.61	4.9e-06	R	AVFQANQENLPILK	R				File4189 Spectrum4270 scans: 7249
12	1	AT1A1_HUMAN	Sodium/potassium-transporting ATPase subunit alpha-1 OS=Homo sapiens GN=ATP1A1 PE=1 SV=1	508	114135	12	12	11	11	3894	1	1	1	547.912	1640.71	3	1640.71	-0.0003	1	28.99	0.0029	K	CIELCCGSVKEMR	E				File4189 Spectrum2189 scans: 4610
12	1	AT1A1_HUMAN	Sodium/potassium-transporting ATPase subunit alpha-1 OS=Homo sapiens GN=ATP1A1 PE=1 SV=1	508	114135	12	12	11	11	4019	1	1	1	843.899	1685.78	2	1685.78	0.0006	0	79.59	3.4e-08	R	NIAFFSTNCVEGTAR	G				File4189 Spectrum4080 scans: 7027
12	1	AT1A1_HUMAN	Sodium/potassium-transporting ATPase subunit alpha-1 OS=Homo sapiens GN=ATP1A1 PE=1 SV=1	508	114135	12	12	11	11	4175	1	1	1	870.991	1739.97	2	1739.97	0	1	85.7	1.8e-08	R	AVFQANQENLPILKR	A				File4189 Spectrum3576 scans: 6413
12	1	AT1A1_HUMAN	Sodium/potassium-transporting ATPase subunit alpha-1 OS=Homo sapiens GN=ATP1A1 PE=1 SV=1	508	114135	12	12	11	11	4176	1	1	1	580.997	1739.97	3	1739.97	0.0006	1	44.74	6.4e-05	R	AVFQANQENLPILKR	A				File4189 Spectrum3587 scans: 6427
12	1	AT1A1_HUMAN	Sodium/potassium-transporting ATPase subunit alpha-1 OS=Homo sapiens GN=ATP1A1 PE=1 SV=1	508	114135	12	12	11	11	4392	1	1	1	906.479	1810.94	2	1810.94	0	0	75.76	7.9e-08	R	QGAIVAVTGDGVNDSPALK	K				File4189 Spectrum3064 scans: 5764
12	1	AT1A1_HUMAN	Sodium/potassium-transporting ATPase subunit alpha-1 OS=Homo sapiens GN=ATP1A1 PE=1 SV=1	508	114135	12	12	11	11	4476	1	1	1	915.466	1828.92	2	1828.92	0.0009	0	76.82	6.3e-08	K	GVGIISEGNETVEDIAAR	L				File4189 Spectrum4119 scans: 7072
12	1	AT1A1_HUMAN	Sodium/potassium-transporting ATPase subunit alpha-1 OS=Homo sapiens GN=ATP1A1 PE=1 SV=1	508	114135	12	12	11	11	7220	1	1	1	721.133	2880.5	4	2880.5	0.0004	2	29.02	0.0019	K	MSINAEEVVVGDLVEVKGGDRIPADLR	I				File4189 Spectrum6058 scans: 9284
12	1	AT1A1_HUMAN	Sodium/potassium-transporting ATPase subunit alpha-1 OS=Homo sapiens GN=ATP1A1 PE=1 SV=1	508	114135	12	12	11	11	7527	1	1	1	1016.54	3046.61	3	3046.6	0.0047	1	64.16	1.7e-06	K	GVGIISEGNETVEDIAARLNIPVSQVNPR	D				File4189 Spectrum6873 scans: 10213
12		AT1A3_HUMAN	Sodium/potassium-transporting ATPase subunit alpha-3 OS=Homo sapiens GN=ATP1A3 PE=1 SV=3	236	113102	5	5	5	5	1986	1	0	1	544.3	1086.59	2	1086.59	0.0002	0	28.05	0.0023	K	LIIVEGCQR	Q				File4189 Spectrum2034 scans: 4409
12		AT1A3_HUMAN	Sodium/potassium-transporting ATPase subunit alpha-3 OS=Homo sapiens GN=ATP1A3 PE=1 SV=3	236	113102	5	5	5	5	2700	1	0	1	618.856	1235.7	2	1235.7	-0.0006	0	58.86	3.9e-06	R	LNIPVSQVNPR	D				File4189 Spectrum2696 scans: 5268
12		AT1A3_HUMAN	Sodium/potassium-transporting ATPase subunit alpha-3 OS=Homo sapiens GN=ATP1A3 PE=1 SV=3	236	113102	5	5	5	5	4392	1	0	1	906.479	1810.94	2	1810.94	0	0	75.76	7.9e-08	R	QGAIVAVTGDGVNDSPALK	K				File4189 Spectrum3064 scans: 5764
12		AT1A3_HUMAN	Sodium/potassium-transporting ATPase subunit alpha-3 OS=Homo sapiens GN=ATP1A3 PE=1 SV=3	236	113102	5	5	5	5	4476	1	0	1	915.466	1828.92	2	1828.92	0.0009	0	76.82	6.3e-08	K	GVGIISEGNETVEDIAAR	L				File4189 Spectrum4119 scans: 7072
12		AT1A3_HUMAN	Sodium/potassium-transporting ATPase subunit alpha-3 OS=Homo sapiens GN=ATP1A3 PE=1 SV=3	236	113102	5	5	5	5	7527	1	0	1	1016.54	3046.61	3	3046.6	0.0047	1	64.16	1.7e-06	K	GVGIISEGNETVEDIAARLNIPVSQVNPR	D				File4189 Spectrum6873 scans: 10213
12		AT1A2_HUMAN	Sodium/potassium-transporting ATPase subunit alpha-2 OS=Homo sapiens GN=ATP1A2 PE=1 SV=1	149	113505	3	3	3	3	1986	1	0	1	544.3	1086.59	2	1086.59	0.0002	0	28.05	0.0023	K	LIIVEGCQR	Q				File4189 Spectrum2034 scans: 4409
12		AT1A2_HUMAN	Sodium/potassium-transporting ATPase subunit alpha-2 OS=Homo sapiens GN=ATP1A2 PE=1 SV=1	149	113505	3	3	3	3	4392	1	0	1	906.479	1810.94	2	1810.94	0	0	75.76	7.9e-08	R	QGAIVAVTGDGVNDSPALK	K				File4189 Spectrum3064 scans: 5764
12		AT1A2_HUMAN	Sodium/potassium-transporting ATPase subunit alpha-2 OS=Homo sapiens GN=ATP1A2 PE=1 SV=1	149	113505	3	3	3	3	4476	1	0	1	915.466	1828.92	2	1828.92	0.0009	0	76.82	6.3e-08	K	GVGIISEGNETVEDIAAR	L				File4189 Spectrum4119 scans: 7072
12		AT12A_HUMAN	Potassium-transporting ATPase alpha chain 2 OS=Homo sapiens GN=ATP12A PE=1 SV=3	28	116292	1	1	1	1	1986	1	0	1	544.3	1086.59	2	1086.59	0.0002	0	28.05	0.0023	K	LIIVEGCQR	Q				File4189 Spectrum2034 scans: 4409
13	1	ATPA_HUMAN	ATP synthase subunit alpha, mitochondrial OS=Homo sapiens GN=ATP5A1 PE=1 SV=1	427	59828	19	13	11	9	3167	1	1	1	679.877	1357.74	2	1357.74	0.0007	1	40.05	0.00094	R	ISVREPMQTGIK	A				File4189 Spectrum1888 scans: 4203
13	1	ATPA_HUMAN	ATP synthase subunit alpha, mitochondrial OS=Homo sapiens GN=ATP5A1 PE=1 SV=1	427	59828	19	13	11	9	3168	1	1	1	453.587	1357.74	3	1357.74	0.001	1	23.18	0.011	R	ISVREPMQTGIK	A				File4189 Spectrum1883 scans: 4197
13	1	ATPA_HUMAN	ATP synthase subunit alpha, mitochondrial OS=Homo sapiens GN=ATP5A1 PE=1 SV=1	427	59828	19	13	11	9	3458	1	1	1	736.925	1471.84	2	1471.84	0.0001	1	39.57	0.00019	K	TSIAIDTIINQKR	F				File4189 Spectrum3360 scans: 6145
13	1	ATPA_HUMAN	ATP synthase subunit alpha, mitochondrial OS=Homo sapiens GN=ATP5A1 PE=1 SV=1	427	59828	19	13	11	9	3738	1	1	1	788.397	1574.78	2	1574.78	-0.0001	0	92.24	2.4e-09	R	ILGADTSVDLEETGR	V				File4189 Spectrum3068 scans: 5770
13	1	ATPA_HUMAN	ATP synthase subunit alpha, mitochondrial OS=Homo sapiens GN=ATP5A1 PE=1 SV=1	427	59828	19	13	11	9	3851	1	1	1	812.949	1623.88	2	1623.88	0	0	8.3	0.17	R	TGAIVDVPVGEELLGR	V				File4189 Spectrum5444 scans: 8589
13	1	ATPA_HUMAN	ATP synthase subunit alpha, mitochondrial OS=Homo sapiens GN=ATP5A1 PE=1 SV=1	427	59828	19	13	11	9	3852	1	1	1	812.949	1623.88	2	1623.88	0.0009	0	61.01	2.5e-06	R	TGAIVDVPVGEELLGR	V				File4189 Spectrum5355 scans: 8491
13	1	ATPA_HUMAN	ATP synthase subunit alpha, mitochondrial OS=Homo sapiens GN=ATP5A1 PE=1 SV=1	427	59828	19	13	11	9	3969	1	1	1	834.4	1666.79	2	1666.79	-0.0015	0	60.5	2.1e-06	R	NVQAEEMVEFSSGLK	G				File4189 Spectrum4133 scans: 7087
13	1	ATPA_HUMAN	ATP synthase subunit alpha, mitochondrial OS=Homo sapiens GN=ATP5A1 PE=1 SV=1	427	59828	19	13	11	9	4091	1	1	1	855.973	1709.93	2	1709.93	0.0009	1	69.1	3.3e-07	R	VVDALGNAIDGKGPIGSK	T				File4189 Spectrum2995 scans: 5666
13	1	ATPA_HUMAN	ATP synthase subunit alpha, mitochondrial OS=Homo sapiens GN=ATP5A1 PE=1 SV=1	427	59828	19	13	11	9	5979	1	1	1	789.445	2365.31	3	2365.32	-0.001	2	49.08	4.8e-05	R	ISVREPMQTGIKAVDSLVPIGR	G				File4189 Spectrum5424 scans: 8568
13	1	ATPA_HUMAN	ATP synthase subunit alpha, mitochondrial OS=Homo sapiens GN=ATP5A1 PE=1 SV=1	427	59828	19	13	11	9	6498	1	1	1	853.12	2556.34	3	2556.34	-0.0004	1	50.74	1.7e-05	R	ILGADTSVDLEETGRVLSIGDGIAR	V				File4189 Spectrum5838 scans: 9034
13	1	ATPA_HUMAN	ATP synthase subunit alpha, mitochondrial OS=Homo sapiens GN=ATP5A1 PE=1 SV=1	427	59828	19	13	11	9	6966	1	1	1	926.507	2776.5	3	2776.5	0.0023	1	11.26	0.34	R	TGAIVDVPVGEELLGRVVDALGNAIDGK	G				File4189 Spectrum9505 scans: 13552
13	1	ATPA_HUMAN	ATP synthase subunit alpha, mitochondrial OS=Homo sapiens GN=ATP5A1 PE=1 SV=1	427	59828	19	13	11	9	8007	1	1	1	1106.27	3315.8	3	3315.8	-0.002	2	46.43	6.9e-05	R	TGAIVDVPVGEELLGRVVDALGNAIDGKGPIGSK	T				File4189 Spectrum9263 scans: 13140
13	1	ATPA_HUMAN	ATP synthase subunit alpha, mitochondrial OS=Homo sapiens GN=ATP5A1 PE=1 SV=1	427	59828	19	13	11	9	8008	1	1	1	829.958	3315.8	4	3315.8	-0.0007	2	40.82	0.00025	R	TGAIVDVPVGEELLGRVVDALGNAIDGKGPIGSK	T				File4189 Spectrum9246 scans: 13116
13	1	ATPA_HUMAN	ATP synthase subunit alpha, mitochondrial OS=Homo sapiens GN=ATP5A1 PE=1 SV=1	427	59828	19	13	11	9	8009	1	1	1	829.958	3315.8	4	3315.8	-0.0004	2	12.63	0.16	R	TGAIVDVPVGEELLGRVVDALGNAIDGKGPIGSK	T				File4189 Spectrum9333 scans: 13240
13	1	ATPA_HUMAN	ATP synthase subunit alpha, mitochondrial OS=Homo sapiens GN=ATP5A1 PE=1 SV=1	427	59828	19	13	11	9	8011	1	1	1	829.958	3315.8	4	3315.8	0.0003	2	23.09	0.015	R	TGAIVDVPVGEELLGRVVDALGNAIDGKGPIGSK	T				File4189 Spectrum9195 scans: 13046
13	1	ATPA_HUMAN	ATP synthase subunit alpha, mitochondrial OS=Homo sapiens GN=ATP5A1 PE=1 SV=1	427	59828	19	13	11	9	8012	1	1	1	1106.28	3315.8	3	3315.8	0.0005	2	12.99	0.15	R	TGAIVDVPVGEELLGRVVDALGNAIDGKGPIGSK	T				File4189 Spectrum9310 scans: 13204
13	1	ATPA_HUMAN	ATP synthase subunit alpha, mitochondrial OS=Homo sapiens GN=ATP5A1 PE=1 SV=1	427	59828	19	13	11	9	8013	1	1	1	829.959	3315.81	4	3315.8	0.0033	2	37.83	0.00048	R	TGAIVDVPVGEELLGRVVDALGNAIDGKGPIGSK	T				File4189 Spectrum9291 scans: 13178
13	1	ATPA_HUMAN	ATP synthase subunit alpha, mitochondrial OS=Homo sapiens GN=ATP5A1 PE=1 SV=1	427	59828	19	13	11	9	8014	1	1	1	1106.28	3315.81	3	3315.8	0.0053	2	12.47	0.16	R	TGAIVDVPVGEELLGRVVDALGNAIDGKGPIGSK	T				File4189 Spectrum9212 scans: 13069
13	1	ATPA_HUMAN	ATP synthase subunit alpha, mitochondrial OS=Homo sapiens GN=ATP5A1 PE=1 SV=1	427	59828	19	13	11	9	8928	1	1	1	982.507	3926	4	3926	-0.0001	2	0.4	0.92	K	QVAGTMKLELAQYREVAAFAQFGSDLDAATQQLLSR	G				File4189 Spectrum8343 scans: 11915
14	1	G3P_HUMAN	Glyceraldehyde-3-phosphate dehydrogenase OS=Homo sapiens GN=GAPDH PE=1 SV=3	382	36201	10	8	8	6	3084	1	1	1	665.828	1329.64	2	1329.64	-0.0001	1	69.83	2.8e-07	R	VVDLMAHMASKE	-				File4189 Spectrum2699 scans: 5272
14	1	G3P_HUMAN	Glyceraldehyde-3-phosphate dehydrogenase OS=Homo sapiens GN=GAPDH PE=1 SV=3	382	36201	10	8	8	6	3289	1	1	1	706.399	1410.78	2	1410.78	0.0004	0	47.89	3.2e-05	R	GALQNIIPASTGAAK	A				File4189 Spectrum3295 scans: 6064
14	1	G3P_HUMAN	Glyceraldehyde-3-phosphate dehydrogenase OS=Homo sapiens GN=GAPDH PE=1 SV=3	382	36201	10	8	8	6	4169	1	1	1	580.651	1738.93	3	1738.93	-0.0001	1	27.01	0.0034	R	DGRGALQNIIPASTGAAK	A				File4189 Spectrum3087 scans: 5796
14	1	G3P_HUMAN	Glyceraldehyde-3-phosphate dehydrogenase OS=Homo sapiens GN=GAPDH PE=1 SV=3	382	36201	10	8	8	6	4170	1	1	1	870.474	1738.93	2	1738.93	0.0014	1	54.72	1.4e-05	R	DGRGALQNIIPASTGAAK	A				File4189 Spectrum3086 scans: 5794
14	1	G3P_HUMAN	Glyceraldehyde-3-phosphate dehydrogenase OS=Homo sapiens GN=GAPDH PE=1 SV=3	382	36201	10	8	8	6	4234	1	1	1	882.404	1762.79	2	1762.8	-0.0014	0	56.06	1.2e-05	K	LISWYDNEFGYSNR	V				File4189 Spectrum4805 scans: 7867
14	1	G3P_HUMAN	Glyceraldehyde-3-phosphate dehydrogenase OS=Homo sapiens GN=GAPDH PE=1 SV=3	382	36201	10	8	8	6	4243	1	1	1	884.011	1766.01	2	1766.01	0.0017	1	6.31	0.81	R	GALQNIIPASTGAAKAVGK	V				File4189 Spectrum3348 scans: 6127
14	1	G3P_HUMAN	Glyceraldehyde-3-phosphate dehydrogenase OS=Homo sapiens GN=GAPDH PE=1 SV=3	382	36201	10	8	8	6	4489	1	1	1	917.465	1832.91	2	1832.91	0.0021	0	89.28	6.4e-09	K	IISNASCTTNCLAPLAK	V				File4189 Spectrum2862 scans: 5487
14	1	G3P_HUMAN	Glyceraldehyde-3-phosphate dehydrogenase OS=Homo sapiens GN=GAPDH PE=1 SV=3	382	36201	10	8	8	6	6587	1	1	1	865.791	2594.35	3	2594.35	-0.0005	0	94.87	1.3e-09	K	VIHDNFGIVEGLMTTVHAITATQK	T				File4189 Spectrum7422 scans: 10838
14	1	G3P_HUMAN	Glyceraldehyde-3-phosphate dehydrogenase OS=Homo sapiens GN=GAPDH PE=1 SV=3	382	36201	10	8	8	6	6588	1	1	1	649.596	2594.35	4	2594.35	0.0001	0	64.95	8.1e-07	K	VIHDNFGIVEGLMTTVHAITATQK	T				File4189 Spectrum7408 scans: 10821
14	1	G3P_HUMAN	Glyceraldehyde-3-phosphate dehydrogenase OS=Homo sapiens GN=GAPDH PE=1 SV=3	382	36201	10	8	8	6	7595	1	1	1	769.614	3074.43	4	3074.43	-0.0001	2	11.4	0.35	K	LISWYDNEFGYSNRVVDLMAHMASKE	-				File4189 Spectrum6953 scans: 10306
15	1	PLAK_HUMAN	Junction plakoglobin OS=Homo sapiens GN=JUP PE=1 SV=3	312	82434	8	7	7	6	2841	1	1	1	633.758	1265.5	2	1265.5	0.0002	0	57.13	1.9e-06	K	GIMEEDEACGR	Q				File4189 Spectrum1061 scans: 3161
15	1	PLAK_HUMAN	Junction plakoglobin OS=Homo sapiens GN=JUP PE=1 SV=3	312	82434	8	7	7	6	3117	1	1	1	671.368	1340.72	2	1340.72	0.0023	0	61.47	6e-06	K	LLNDEDPVVVTK	A				File4189 Spectrum2612 scans: 5160
15	1	PLAK_HUMAN	Junction plakoglobin OS=Homo sapiens GN=JUP PE=1 SV=3	312	82434	8	7	7	6	3326	1	1	1	714.406	1426.8	2	1426.8	0.0005	0	30.62	0.0013	R	ALMGSPQLVAAVVR	T	Oxidation (M)	0.00100000000000.0		File4189 Spectrum3823 scans: 6729
15	1	PLAK_HUMAN	Junction plakoglobin OS=Homo sapiens GN=JUP PE=1 SV=3	312	82434	8	7	7	6	5012	1	1	1	677.017	2028.03	3	2028.03	0.0011	0	77.69	7.9e-08	K	SAIVHLINYQDDAELATR	A				File4189 Spectrum3871 scans: 6788
15	1	PLAK_HUMAN	Junction plakoglobin OS=Homo sapiens GN=JUP PE=1 SV=3	312	82434	8	7	7	6	5013	1	1	1	1015.02	2028.03	2	2028.03	0.0027	0	77.87	1.6e-07	K	SAIVHLINYQDDAELATR	A				File4189 Spectrum3882 scans: 6800
15	1	PLAK_HUMAN	Junction plakoglobin OS=Homo sapiens GN=JUP PE=1 SV=3	312	82434	8	7	7	6	5172	1	1	1	698.728	2093.16	3	2093.16	0.0001	1	35.36	0.0013	R	ALPELTKLLNDEDPVVVTK	A				File4189 Spectrum5904 scans: 9109
15	1	PLAK_HUMAN	Junction plakoglobin OS=Homo sapiens GN=JUP PE=1 SV=3	312	82434	8	7	7	6	5926	1	1	1	783.106	2346.3	3	2346.29	0.0019	0	11.03	0.25	R	LNTIPLFVQLLYSSVENIQR	V				File4189 Spectrum9603 scans: 13765
15	1	PLAK_HUMAN	Junction plakoglobin OS=Homo sapiens GN=JUP PE=1 SV=3	312	82434	8	7	7	6	8006	1	1	1	1106.21	3315.62	3	3315.62	0.0003	1	80.37	2.9e-08	R	VREAMCPGVSGEDSSLLLATQVEGQATNLQR	L				File4189 Spectrum4794 scans: 7854
16	1	SSBP_HUMAN	Single-stranded DNA-binding protein, mitochondrial OS=Homo sapiens GN=SSBP1 PE=1 SV=1	292	17249	7	7	6	6	943	1	1	1	442.253	882.492	2	882.492	-0.0003	0	49.08	7.1e-05	R	VGQDPVLR	Q				File4189 Spectrum928 scans: 3004
16	1	SSBP_HUMAN	Single-stranded DNA-binding protein, mitochondrial OS=Homo sapiens GN=SSBP1 PE=1 SV=1	292	17249	7	7	6	6	3821	1	1	1	806.378	1610.74	2	1610.74	-0.0017	0	65.53	7.2e-07	R	SGDSEVYQLGDVSQK	T				File4189 Spectrum2405 scans: 4889
16	1	SSBP_HUMAN	Single-stranded DNA-binding protein, mitochondrial OS=Homo sapiens GN=SSBP1 PE=1 SV=1	292	17249	7	7	6	6	4914	1	1	1	996.534	1991.05	2	1991.06	-0.0042	0	39.65	0.00019	R	QATTIIADNIIFLSDQTK	E				File4189 Spectrum6274 scans: 9533
16	1	SSBP_HUMAN	Single-stranded DNA-binding protein, mitochondrial OS=Homo sapiens GN=SSBP1 PE=1 SV=1	292	17249	7	7	6	6	5781	1	1	1	765.033	2292.08	3	2292.08	-0.001	1	55.06	6.9e-06	R	SGDSEVYQLGDVSQKTTWHR	I				File4189 Spectrum2873 scans: 5501
16	1	SSBP_HUMAN	Single-stranded DNA-binding protein, mitochondrial OS=Homo sapiens GN=SSBP1 PE=1 SV=1	292	17249	7	7	6	6	5862	1	1	1	774.062	2319.17	3	2319.17	-0.0025	1	77.29	5.7e-08	R	QVEGKNPVTIFSLATNEMWR	S				File4189 Spectrum6645 scans: 9951
16	1	SSBP_HUMAN	Single-stranded DNA-binding protein, mitochondrial OS=Homo sapiens GN=SSBP1 PE=1 SV=1	292	17249	7	7	6	6	6026	1	1	1	1189.63	2377.24	2	2377.24	0.001	2	37.94	0.00028	R	QATTIIADNIIFLSDQTKEKE	-				File4189 Spectrum5835 scans: 9029
16	1	SSBP_HUMAN	Single-stranded DNA-binding protein, mitochondrial OS=Homo sapiens GN=SSBP1 PE=1 SV=1	292	17249	7	7	6	6	6027	1	1	1	793.421	2377.24	3	2377.24	0.0041	2	67.3	4.9e-07	R	QATTIIADNIIFLSDQTKEKE	-				File4189 Spectrum5799 scans: 8989
17	1	NPM_HUMAN	Nucleophosmin OS=Homo sapiens GN=NPM1 PE=1 SV=2	284	32726	7	7	7	7	466	1	1	1	392.224	782.433	2	782.433	0.0001	0	26.52	0.013	K	FINYVK	N				File4189 Spectrum1796 scans: 4090
17	1	NPM_HUMAN	Nucleophosmin OS=Homo sapiens GN=NPM1 PE=1 SV=2	284	32726	7	7	7	7	2213	1	1	1	377.54	1129.6	3	1129.6	0.0002	1	38.79	0.00096	K	GPSSVEDIKAK	M				File4189 Spectrum378 scans: 2324
17	1	NPM_HUMAN	Nucleophosmin OS=Homo sapiens GN=NPM1 PE=1 SV=2	284	32726	7	7	7	7	3173	1	1	1	454.233	1359.68	3	1359.68	0.0003	1	24.03	0.0056	K	FINYVKNCFR	M				File4189 Spectrum2833 scans: 5448
17	1	NPM_HUMAN	Nucleophosmin OS=Homo sapiens GN=NPM1 PE=1 SV=2	284	32726	7	7	7	7	4435	1	1	1	910.426	1818.84	2	1818.84	0.0007	0	75.71	8e-08	R	MTDQEAIQDLWQWR	K				File4189 Spectrum6439 scans: 9727
17	1	NPM_HUMAN	Nucleophosmin OS=Homo sapiens GN=NPM1 PE=1 SV=2	284	32726	7	7	7	7	4813	1	1	1	649.985	1946.93	3	1946.93	0.0028	1	69.46	4.2e-07	R	MTDQEAIQDLWQWRK	S				File4189 Spectrum5447 scans: 8593
17	1	NPM_HUMAN	Nucleophosmin OS=Homo sapiens GN=NPM1 PE=1 SV=2	284	32726	7	7	7	7	5539	1	1	1	1114.11	2226.21	2	2226.21	-0.0026	0	95.45	1.7e-09	K	MSVQPTVSLGGFEITPPVVLR	L				File4189 Spectrum6906 scans: 10250
17	1	NPM_HUMAN	Nucleophosmin OS=Homo sapiens GN=NPM1 PE=1 SV=2	284	32726	7	7	7	7	9500	1	1	1	1062.39	4245.53	4	4245.54	-0.0113	2	59.51	1.1e-06	K	LAADEDDDDDDEEDDDEDDDDDDFDDEEAEEKAPVKK	S				File4189 Spectrum1852 scans: 4160
18	1	CKAP4_HUMAN	Cytoskeleton-associated protein 4 OS=Homo sapiens GN=CKAP4 PE=1 SV=2	270	66097	7	7	6	6	3907	1	1	1	823.915	1645.82	2	1645.82	-0.0007	1	49.72	0.00012	K	VASLEESEGNKQDLK	A				File4189 Spectrum726 scans: 2756
18	1	CKAP4_HUMAN	Cytoskeleton-associated protein 4 OS=Homo sapiens GN=CKAP4 PE=1 SV=2	270	66097	7	7	6	6	4359	1	1	1	898.981	1795.95	2	1795.95	-0.0001	0	32.69	0.00086	K	VQSLQATFGTFESILR	S				File4189 Spectrum7129 scans: 10501
18	1	CKAP4_HUMAN	Cytoskeleton-associated protein 4 OS=Homo sapiens GN=CKAP4 PE=1 SV=2	270	66097	7	7	6	6	4516	1	1	1	613.984	1838.93	3	1838.93	-0.0009	0	40.22	0.00025	R	LQHVEDGVLSMQVASAR	Q				File4189 Spectrum3049 scans: 5744
18	1	CKAP4_HUMAN	Cytoskeleton-associated protein 4 OS=Homo sapiens GN=CKAP4 PE=1 SV=2	270	66097	7	7	6	6	4517	1	1	1	920.474	1838.93	2	1838.93	0.0017	0	22.07	0.0085	R	LQHVEDGVLSMQVASAR	Q				File4189 Spectrum3066 scans: 5767
18	1	CKAP4_HUMAN	Cytoskeleton-associated protein 4 OS=Homo sapiens GN=CKAP4 PE=1 SV=2	270	66097	7	7	6	6	5063	1	1	1	683.7	2048.08	3	2048.08	-0.0018	1	56.27	5.3e-06	R	SLGETQLVLYGDVEELKR	S				File4189 Spectrum4841 scans: 7908
18	1	CKAP4_HUMAN	Cytoskeleton-associated protein 4 OS=Homo sapiens GN=CKAP4 PE=1 SV=2	270	66097	7	7	6	6	6629	1	1	1	872.119	2613.34	3	2613.34	0.0003	1	99.98	4.2e-10	R	LAALQGRLEGLGSSEADQDGLASTVR	S				File4189 Spectrum3935 scans: 6863
18	1	CKAP4_HUMAN	Cytoskeleton-associated protein 4 OS=Homo sapiens GN=CKAP4 PE=1 SV=2	270	66097	7	7	6	6	8222	1	1	1	869.96	3475.81	4	3475.81	0.0033	2	72.89	1.5e-07	R	QREELGQGLQGVEQKVQSLQATFGTFESILR	S				File4189 Spectrum7775 scans: 11261
19	1	CTND1_HUMAN	Catenin delta-1 OS=Homo sapiens GN=CTNND1 PE=1 SV=1	268	108674	5	5	4	4	4664	1	1	1	943.465	1884.91	2	1884.92	-0.0002	0	91.98	4.6e-09	R	HIEWESVLTNTAGCLR	N				File4189 Spectrum5012 scans: 8103
19	1	CTND1_HUMAN	Catenin delta-1 OS=Homo sapiens GN=CTNND1 PE=1 SV=1	268	108674	5	5	4	4	4665	1	1	1	629.313	1884.92	3	1884.92	0.0014	0	37.87	0.00028	R	HIEWESVLTNTAGCLR	N				File4189 Spectrum5007 scans: 8098
19	1	CTND1_HUMAN	Catenin delta-1 OS=Homo sapiens GN=CTNND1 PE=1 SV=1	268	108674	5	5	4	4	4883	1	1	1	987.417	1972.82	2	1972.82	0.0013	0	81.56	9.8e-09	R	HYEDGYPGGSDNYGSLSR	V				File4189 Spectrum1790 scans: 4079
19	1	CTND1_HUMAN	Catenin delta-1 OS=Homo sapiens GN=CTNND1 PE=1 SV=1	268	108674	5	5	4	4	7394	1	1	1	996.169	2985.49	3	2985.49	-0.0012	0	92.04	2.5e-09	R	TVQPVAMGPDGLPVDASSVSNNYIQTLGR	D				File4189 Spectrum5660 scans: 8831
19	1	CTND1_HUMAN	Catenin delta-1 OS=Homo sapiens GN=CTNND1 PE=1 SV=1	268	108674	5	5	4	4	7456	1	1	1	1005.12	3012.33	3	3012.32	0.004	0	33.25	0.0014	R	SYEDMIGEEVPSDQYYWAPLAQHER	G				File4189 Spectrum5615 scans: 8779
20	1	RS5_HUMAN	40S ribosomal protein S5 OS=Homo sapiens GN=RPS5 PE=1 SV=4	267	23033	9	7	7	6	3533	1	1	1	751.401	1500.79	2	1500.79	0.0002	0	61.9	1.6e-06	R	VNQAIWLLCTGAR	E				File4189 Spectrum4979 scans: 8066
20	1	RS5_HUMAN	40S ribosomal protein S5 OS=Homo sapiens GN=RPS5 PE=1 SV=4	267	23033	9	7	7	6	3534	1	1	1	751.401	1500.79	2	1500.79	0.0005	0	42.89	9.5e-05	R	VNQAIWLLCTGAR	E				File4189 Spectrum5055 scans: 8153
20	1	RS5_HUMAN	40S ribosomal protein S5 OS=Homo sapiens GN=RPS5 PE=1 SV=4	267	23033	9	7	7	6	3866	1	1	1	816.418	1630.82	2	1630.82	-0.0016	0	97.81	1.6e-09	K	TIAECLADELINAAK	G				File4189 Spectrum6832 scans: 10167
20	1	RS5_HUMAN	40S ribosomal protein S5 OS=Homo sapiens GN=RPS5 PE=1 SV=4	267	23033	9	7	7	6	4900	1	1	1	663.023	1986.05	3	1986.05	0.0019	1	40.37	0.00016	R	NIKTIAECLADELINAAK	G				File4189 Spectrum7732 scans: 11212
20	1	RS5_HUMAN	40S ribosomal protein S5 OS=Homo sapiens GN=RPS5 PE=1 SV=4	267	23033	9	7	7	6	4901	2	1	1	663.024	1986.05	3	1986.05	0.0046	1	3.8	2	R	NIKTIAECLADELINAAK	G				File4189 Spectrum3420 scans: 6223
20	1	RS5_HUMAN	40S ribosomal protein S5 OS=Homo sapiens GN=RPS5 PE=1 SV=4	267	23033	9	7	7	6	6455	1	1	1	847.095	2538.26	3	2538.26	-0.0015	1	22.47	0.0078	K	TIAECLADELINAAKGSSNSYAIK	K				File4189 Spectrum7002 scans: 10359
20	1	RS5_HUMAN	40S ribosomal protein S5 OS=Homo sapiens GN=RPS5 PE=1 SV=4	267	23033	9	7	7	6	6553	1	1	1	860.766	2579.28	3	2579.28	-0.0001	1	60.87	2e-06	K	WSTDDVQINDISLQDYIAVKEK	Y				File4189 Spectrum5530 scans: 8683
20	1	RS5_HUMAN	40S ribosomal protein S5 OS=Homo sapiens GN=RPS5 PE=1 SV=4	267	23033	9	7	7	6	7243	1	1	1	965.504	2893.49	3	2893.49	0.0041	2	37.63	0.0003	R	NIKTIAECLADELINAAKGSSNSYAIK	K				File4189 Spectrum7768 scans: 11253
20	1	RS5_HUMAN	40S ribosomal protein S5 OS=Homo sapiens GN=RPS5 PE=1 SV=4	267	23033	9	7	7	6	7339	1	1	1	981.496	2941.47	3	2941.47	-0.0053	2	6.09	0.27	K	WSTDDVQINDISLQDYIAVKEKYAK	Y				File4189 Spectrum5233 scans: 8353
21	1	PDIP3_HUMAN	Polymerase delta-interacting protein 3 OS=Homo sapiens GN=POLDIP3 PE=1 SV=2	259	46289	11	10	11	10	196	1	1	1	366.206	730.397	2	730.397	0	0	50.12	0.00016	K	IGLSDAR	L				File4189 Spectrum908 scans: 2981
21	1	PDIP3_HUMAN	Polymerase delta-interacting protein 3 OS=Homo sapiens GN=POLDIP3 PE=1 SV=2	259	46289	11	10	11	10	3227	1	1	1	693.883	1385.75	2	1385.76	-0.0105	0	78.07	7.7e-08	R	VGIQQGLLSQSTR	T				File4189 Spectrum2742 scans: 5335
21	1	PDIP3_HUMAN	Polymerase delta-interacting protein 3 OS=Homo sapiens GN=POLDIP3 PE=1 SV=2	259	46289	11	10	11	10	3377	1	1	1	720.354	1438.69	2	1438.69	-0.0003	0	21.33	0.021	K	SSGASVTTQPTEFK	I				File4189 Spectrum1472 scans: 3686
21	1	PDIP3_HUMAN	Polymerase delta-interacting protein 3 OS=Homo sapiens GN=POLDIP3 PE=1 SV=2	259	46289	11	10	11	10	3863	1	1	1	815.455	1628.9	2	1628.9	0	1	26.54	0.0032	R	SRVGIQQGLLSQSTR	T				File4189 Spectrum2171 scans: 4587
21	1	PDIP3_HUMAN	Polymerase delta-interacting protein 3 OS=Homo sapiens GN=POLDIP3 PE=1 SV=2	259	46289	11	10	11	10	4319	1	1	1	598.66	1792.96	3	1792.96	0.0005	2	20.23	0.013	K	SSGASVTTQPTEFKIKL	-				File4189 Spectrum3822 scans: 6728
21	1	PDIP3_HUMAN	Polymerase delta-interacting protein 3 OS=Homo sapiens GN=POLDIP3 PE=1 SV=2	259	46289	11	10	11	10	4377	1	1	1	901.476	1800.94	2	1800.94	0.0006	0	89.46	4.1e-09	K	VVQNDAYTAPALPSSIR	T				File4189 Spectrum3290 scans: 6057
21	1	PDIP3_HUMAN	Polymerase delta-interacting protein 3 OS=Homo sapiens GN=POLDIP3 PE=1 SV=2	259	46289	11	10	11	10	5279	1	1	1	713.359	2137.05	3	2137.05	-0.0012	1	13.45	0.055	R	VTEEDIVELFCVCGALKR	A				File4189 Spectrum6466 scans: 9757
21	1	PDIP3_HUMAN	Polymerase delta-interacting protein 3 OS=Homo sapiens GN=POLDIP3 PE=1 SV=2	259	46289	11	10	11	10	5470	1	1	1	1099.06	2196.1	2	2196.1	0.0002	1	22.17	0.0083	R	RVNSASSSNPPAEVDPDTILK	A				File4189 Spectrum2943 scans: 5592
21	1	PDIP3_HUMAN	Polymerase delta-interacting protein 3 OS=Homo sapiens GN=POLDIP3 PE=1 SV=2	259	46289	11	10	11	10	5533	1	1	1	741.764	2222.27	3	2222.27	0.0014	1	35.08	0.00047	R	SSPAAFINPPIGTVTPALKLTK	T				File4189 Spectrum5362 scans: 8499
21	1	PDIP3_HUMAN	Polymerase delta-interacting protein 3 OS=Homo sapiens GN=POLDIP3 PE=1 SV=2	259	46289	11	10	11	10	6330	1	1	1	832.39	2494.15	3	2494.15	-0.0046	1	11.56	0.082	K	QNLYDLDEDDDGIASVPTKQMK	F				File4189 Spectrum3602 scans: 6445
21	1	PDIP3_HUMAN	Polymerase delta-interacting protein 3 OS=Homo sapiens GN=POLDIP3 PE=1 SV=2	259	46289	11	10	11	10	6999	1	1	1	929.51	2785.51	3	2785.51	-0.0042	2	52.23	2.2e-05	R	TLVNKEEPPKELPAAEPVLSPLEGTK	M				File4189 Spectrum3757 scans: 6643
22	1	IF4A1_HUMAN	Eukaryotic initiation factor 4A-I OS=Homo sapiens GN=EIF4A1 PE=1 SV=1	258	46353	8	7	4	3	614	2	1	1	407.746	813.478	2	813.478	-0.0001	0	3.26	1.1	R	AILPCIK	G				File4189 Spectrum2974 scans: 5636
22	1	IF4A1_HUMAN	Eukaryotic initiation factor 4A-I OS=Homo sapiens GN=EIF4A1 PE=1 SV=1	258	46353	8	7	4	3	4465	1	1	1	914.476	1826.94	2	1826.93	0.0057	0	78.58	4.3e-08	R	GIYAYGFEKPSAIQQR	A				File4189 Spectrum3045 scans: 5737
22	1	IF4A1_HUMAN	Eukaryotic initiation factor 4A-I OS=Homo sapiens GN=EIF4A1 PE=1 SV=1	258	46353	8	7	4	3	7025	1	1	1	1399.2	2796.39	2	2796.39	-0.0035	1	16.32	0.029	R	TLRDIETFYNTSIEEMPLNVADLI	-				File4189 Spectrum8626 scans: 12255
22	1	IF4A1_HUMAN	Eukaryotic initiation factor 4A-I OS=Homo sapiens GN=EIF4A1 PE=1 SV=1	258	46353	8	7	4	3	7026	1	1	1	933.136	2796.39	3	2796.39	-0.0019	1	61.48	1.7e-06	R	TLRDIETFYNTSIEEMPLNVADLI	-				File4189 Spectrum8679 scans: 12326
22	1	IF4A1_HUMAN	Eukaryotic initiation factor 4A-I OS=Homo sapiens GN=EIF4A1 PE=1 SV=1	258	46353	8	7	4	3	7027	1	1	1	1399.2	2796.39	2	2796.39	-0.0006	1	49.56	2.3e-05	R	TLRDIETFYNTSIEEMPLNVADLI	-				File4189 Spectrum8675 scans: 12321
22	1	IF4A1_HUMAN	Eukaryotic initiation factor 4A-I OS=Homo sapiens GN=EIF4A1 PE=1 SV=1	258	46353	8	7	4	3	7028	1	1	1	933.138	2796.39	3	2796.39	0.0027	1	13.63	0.053	R	TLRDIETFYNTSIEEMPLNVADLI	-				File4189 Spectrum8628 scans: 12258
22	1	IF4A1_HUMAN	Eukaryotic initiation factor 4A-I OS=Homo sapiens GN=EIF4A1 PE=1 SV=1	258	46353	8	7	4	3	9419	1	1	1	1389.62	4165.85	3	4165.85	-0.0004	1	53.47	6.7e-06	R	SRDNGPDGMEPEGVIESNWNEIVDSFDDMNLSESLLR	G				File4189 Spectrum8833 scans: 12517
22	1	IF4A1_HUMAN	Eukaryotic initiation factor 4A-I OS=Homo sapiens GN=EIF4A1 PE=1 SV=1	258	46353	8	7	4	3	9420	1	1	1	1389.63	4165.85	3	4165.85	0.0062	1	74.84	5.7e-08	R	SRDNGPDGMEPEGVIESNWNEIVDSFDDMNLSESLLR	G				File4189 Spectrum8888 scans: 12589
22		IF4A2_HUMAN	Eukaryotic initiation factor 4A-II OS=Homo sapiens GN=EIF4A2 PE=1 SV=2	79	46601	2	1	2	1	614	2	0	1	407.746	813.478	2	813.478	-0.0001	0	3.26	1.1	R	AIIPCIK	G				File4189 Spectrum2974 scans: 5636
22		IF4A2_HUMAN	Eukaryotic initiation factor 4A-II OS=Homo sapiens GN=EIF4A2 PE=1 SV=2	79	46601	2	1	2	1	4465	1	0	1	914.476	1826.94	2	1826.93	0.0057	0	78.58	4.3e-08	R	GIYAYGFEKPSAIQQR	A				File4189 Spectrum3045 scans: 5737
23	1	ATPB_HUMAN	ATP synthase subunit beta, mitochondrial OS=Homo sapiens GN=ATP5B PE=1 SV=3	258	56525	9	7	8	7	3794	2	1	1	801.414	1600.81	2	1600.8	0.0094	0	6.8	1.8	K	VALVYGQMNEPPGAR	A				File4189 Spectrum4305 scans: 7293
23	1	ATPB_HUMAN	ATP synthase subunit beta, mitochondrial OS=Homo sapiens GN=ATP5B PE=1 SV=3	258	56525	9	7	8	7	3841	2	1	1	809.412	1616.81	2	1616.8	0.0104	0	7.92	1.5	K	VALVYGQMNEPPGAR	A	Oxidation (M)	0.000000010000000.0		File4189 Spectrum3537 scans: 6367
23	1	ATPB_HUMAN	ATP synthase subunit beta, mitochondrial OS=Homo sapiens GN=ATP5B PE=1 SV=3	258	56525	9	7	8	7	3928	1	1	1	825.964	1649.91	2	1649.91	0.0035	0	42.6	0.0001	R	LVLEVAQHLGESTVR	T				File4189 Spectrum3768 scans: 6658
23	1	ATPB_HUMAN	ATP synthase subunit beta, mitochondrial OS=Homo sapiens GN=ATP5B PE=1 SV=3	258	56525	9	7	8	7	4733	1	1	1	640.37	1918.09	3	1918.09	0.0005	1	35.79	0.00066	K	VLDSGAPIKIPVGPETLGR	I				File4189 Spectrum4344 scans: 7337
23	1	ATPB_HUMAN	ATP synthase subunit beta, mitochondrial OS=Homo sapiens GN=ATP5B PE=1 SV=3	258	56525	9	7	8	7	4904	1	1	1	994.52	1987.03	2	1987.03	-0.0006	0	61.35	1.8e-06	R	AIAELGIYPAVDPLDSTSR	I				File4189 Spectrum5719 scans: 8899
23	1	ATPB_HUMAN	ATP synthase subunit beta, mitochondrial OS=Homo sapiens GN=ATP5B PE=1 SV=3	258	56525	9	7	8	7	4962	1	1	1	670.706	2009.1	3	2009.1	-0.0016	2	14.69	0.042	R	IMNVIGEPIDERGPIKTK	Q				File4189 Spectrum3065 scans: 5765
23	1	ATPB_HUMAN	ATP synthase subunit beta, mitochondrial OS=Homo sapiens GN=ATP5B PE=1 SV=3	258	56525	9	7	8	7	5001	1	1	1	675.008	2022	3	2022	-0.0021	0	77.51	6.8e-08	R	FLSQPFQVAEVFTGHMGK	L				File4189 Spectrum6367 scans: 9645
23	1	ATPB_HUMAN	ATP synthase subunit beta, mitochondrial OS=Homo sapiens GN=ATP5B PE=1 SV=3	258	56525	9	7	8	7	6782	1	1	1	892.464	2674.37	3	2674.37	-0.0026	1	60.64	2.1e-06	K	SLQDIIAILGMDELSEEDKLTVSR	A				File4189 Spectrum8030 scans: 11550
23	1	ATPB_HUMAN	ATP synthase subunit beta, mitochondrial OS=Homo sapiens GN=ATP5B PE=1 SV=3	258	56525	9	7	8	7	8173	1	1	1	859.704	3434.79	4	3434.79	0.0012	2	59.44	2.7e-06	K	ILQDYKSLQDIIAILGMDELSEEDKLTVSR	A				File4189 Spectrum8042 scans: 11563
24	1	DSG1_HUMAN	Desmoglein-1 OS=Homo sapiens GN=DSG1 PE=1 SV=2	245	114702	9	7	6	5	3962	1	1	1	831.886	1661.76	2	1661.76	0.0004	0	50.98	4e-05	K	IHSDCAANQQVTYR	I				File4189 Spectrum434 scans: 2394
24	1	DSG1_HUMAN	Desmoglein-1 OS=Homo sapiens GN=DSG1 PE=1 SV=2	245	114702	9	7	6	5	3963	1	1	1	554.927	1661.76	3	1661.76	0.0014	0	55.94	5.7e-06	K	IHSDCAANQQVTYR	I				File4189 Spectrum424 scans: 2381
24	1	DSG1_HUMAN	Desmoglein-1 OS=Homo sapiens GN=DSG1 PE=1 SV=2	245	114702	9	7	6	5	4152	1	1	1	867.929	1733.84	2	1733.84	0.0033	0	97.84	6.7e-10	R	YVMGNNPADLLAVDSR	T				File4189 Spectrum4587 scans: 7616
24	1	DSG1_HUMAN	Desmoglein-1 OS=Homo sapiens GN=DSG1 PE=1 SV=2	245	114702	9	7	6	5	4591	1	1	1	619.988	1856.94	3	1856.94	0.0009	0	27.07	0.0029	R	ALNSMGQDLERPLELR	V	Oxidation (M)	0.0000100000000000.0		File4189 Spectrum3031 scans: 5717
24	1	DSG1_HUMAN	Desmoglein-1 OS=Homo sapiens GN=DSG1 PE=1 SV=2	245	114702	9	7	6	5	5057	1	1	1	1023.06	2044.1	2	2044.1	0.0016	0	50.57	1.8e-05	R	ISGVGIDQPPYGIFVINQK	T				File4189 Spectrum5926 scans: 9133
24	1	DSG1_HUMAN	Desmoglein-1 OS=Homo sapiens GN=DSG1 PE=1 SV=2	245	114702	9	7	6	5	5152	1	1	1	696.323	2085.95	3	2085.95	0.0017	0	11.51	0.32	R	SSSDHHFNQTIGSASPSTAR	S				File4189 Spectrum770 scans: 2811
24	1	DSG1_HUMAN	Desmoglein-1 OS=Homo sapiens GN=DSG1 PE=1 SV=2	245	114702	9	7	6	5	5153	1	1	1	522.495	2085.95	4	2085.95	0.0035	0	7.47	0.81	R	SSSDHHFNQTIGSASPSTAR	S				File4189 Spectrum776 scans: 2819
24	1	DSG1_HUMAN	Desmoglein-1 OS=Homo sapiens GN=DSG1 PE=1 SV=2	245	114702	9	7	6	5	5254	1	1	1	710.283	2127.83	3	2127.83	0.0015	1	39.95	0.0001	R	GSDRDGGADGMSAECECNIK	I				File4189 Spectrum801 scans: 2852
24	1	DSG1_HUMAN	Desmoglein-1 OS=Homo sapiens GN=DSG1 PE=1 SV=2	245	114702	9	7	6	5	5292	1	1	1	715.614	2143.82	3	2143.82	-0.001	1	16.75	0.021	R	GSDRDGGADGMSAECECNIK	I	Oxidation (M)	0.00000000001000000000.0		File4189 Spectrum253 scans: 2172
25	1	LEG7_HUMAN	Galectin-7 OS=Homo sapiens GN=LGALS7 PE=1 SV=2	232	15123	8	8	7	7	1051	1	1	1	455.759	909.504	2	909.503	0.0003	0	27.91	0.01	R	GLVPPNASR	F				File4189 Spectrum976 scans: 3062
25	1	LEG7_HUMAN	Galectin-7 OS=Homo sapiens GN=LGALS7 PE=1 SV=2	232	15123	8	8	7	7	3499	1	1	1	743.399	1484.78	2	1484.78	0.0001	0	45.5	5.4e-05	R	LVEVGGDVQLDSVR	I				File4189 Spectrum3286 scans: 6053
25	1	LEG7_HUMAN	Galectin-7 OS=Homo sapiens GN=LGALS7 PE=1 SV=2	232	15123	8	8	7	7	4174	1	1	1	870.985	1739.95	2	1739.95	0.0015	1	43.38	0.00015	R	VRLVEVGGDVQLDSVR	I				File4189 Spectrum3461 scans: 6272
25	1	LEG7_HUMAN	Galectin-7 OS=Homo sapiens GN=LGALS7 PE=1 SV=2	232	15123	8	8	7	7	4934	1	1	1	667.709	2000.11	3	2000.11	0	2	32.26	0.00094	R	VRLVEVGGDVQLDSVRIF	-				File4189 Spectrum5906 scans: 9111
25	1	LEG7_HUMAN	Galectin-7 OS=Homo sapiens GN=LGALS7 PE=1 SV=2	232	15123	8	8	7	7	6229	1	1	1	818.395	2452.16	3	2452.16	0.0012	2	53.16	1e-05	R	LDTSEVVFNSKEQGSWGREER	G				File4189 Spectrum2849 scans: 5470
25	1	LEG7_HUMAN	Galectin-7 OS=Homo sapiens GN=LGALS7 PE=1 SV=2	232	15123	8	8	7	7	6385	1	1	1	837.734	2510.18	3	2510.18	0.0034	0	70.32	2.5e-07	R	FHVNLLCGEEQGSDAALHFNPR	L				File4189 Spectrum4190 scans: 7153
25	1	LEG7_HUMAN	Galectin-7 OS=Homo sapiens GN=LGALS7 PE=1 SV=2	232	15123	8	8	7	7	7666	1	1	1	624.117	3115.55	5	3115.55	-0.0005	1	44.08	7.4e-05	R	GQPFEVLIIASDDGFKAVVGDAQYHHFR	H				File4189 Spectrum7209 scans: 10595
25	1	LEG7_HUMAN	Galectin-7 OS=Homo sapiens GN=LGALS7 PE=1 SV=2	232	15123	8	8	7	7	7667	1	1	1	779.895	3115.55	4	3115.55	0.0011	1	29.75	0.0016	R	GQPFEVLIIASDDGFKAVVGDAQYHHFR	H				File4189 Spectrum7229 scans: 10618
26	1	RS17L_HUMAN	40S ribosomal protein S17-like OS=Homo sapiens GN=RPS17L PE=3 SV=1	218	15597	4	4	4	4	3228	1	1	1	693.887	1385.76	2	1385.76	0.0002	1	37.72	0.00029	R	VCEEIAIIPSKK	L				File4189 Spectrum2413 scans: 4899
26	1	RS17L_HUMAN	40S ribosomal protein S17-like OS=Homo sapiens GN=RPS17L PE=3 SV=1	218	15597	4	4	4	4	6110	1	1	1	1205.13	2408.24	2	2408.24	0.0008	0	87.43	6.3e-09	K	LLDFGSLSNLQVTQPTVGMNFK	T				File4189 Spectrum6675 scans: 9989
26	1	RS17L_HUMAN	40S ribosomal protein S17-like OS=Homo sapiens GN=RPS17L PE=3 SV=1	218	15597	4	4	4	4	6934	1	1	1	921.82	2762.44	3	2762.44	-0.0031	1	82.28	1.9e-08	K	LLDFGSLSNLQVTQPTVGMNFKTPR	G				File4189 Spectrum6215 scans: 9463
26	1	RS17L_HUMAN	40S ribosomal protein S17-like OS=Homo sapiens GN=RPS17L PE=3 SV=1	218	15597	4	4	4	4	7401	1	1	1	997.491	2989.45	3	2989.45	0.0022	1	61.24	1.8e-06	R	DNYVPEVSALDQEIIEVDPDTKEMLK	L				File4189 Spectrum6568 scans: 9868
27	1	KPRP_HUMAN	Keratinocyte proline-rich protein OS=Homo sapiens GN=KPRP PE=1 SV=1	216	67172	6	5	5	4	3525	1	1	1	500.253	1497.74	3	1497.74	0.0002	1	14.04	0.048	R	RLDQCPESPLQR	C				File4189 Spectrum1374 scans: 3555
27	1	KPRP_HUMAN	Keratinocyte proline-rich protein OS=Homo sapiens GN=KPRP PE=1 SV=1	216	67172	6	5	5	4	6359	1	1	1	835.018	2502.03	3	2502.03	0.0006	0	68.04	1.6e-07	R	FSTQCQYQGSYSSCGPQFQSR	A				File4189 Spectrum2388 scans: 4865
27	1	KPRP_HUMAN	Keratinocyte proline-rich protein OS=Homo sapiens GN=KPRP PE=1 SV=1	216	67172	6	5	5	4	6360	1	1	1	1252.02	2502.04	2	2502.03	0.0024	0	108.72	1.3e-11	R	FSTQCQYQGSYSSCGPQFQSR	A				File4189 Spectrum2373 scans: 4846
27	1	KPRP_HUMAN	Keratinocyte proline-rich protein OS=Homo sapiens GN=KPRP PE=1 SV=1	216	67172	6	5	5	4	7005	1	1	1	930.407	2788.2	3	2788.2	0.0023	0	55.15	5.5e-06	R	TSFSPCVPQCQTQGSYGSFTEQHR	S				File4189 Spectrum2899 scans: 5534
27	1	KPRP_HUMAN	Keratinocyte proline-rich protein OS=Homo sapiens GN=KPRP PE=1 SV=1	216	67172	6	5	5	4	7390	1	1	1	995.786	2984.34	3	2984.33	0.0021	0	27.17	0.0057	R	ATCNNYTPQFQLRPSYSSCFPQYR	S				File4189 Spectrum4181 scans: 7144
27	1	KPRP_HUMAN	Keratinocyte proline-rich protein OS=Homo sapiens GN=KPRP PE=1 SV=1	216	67172	6	5	5	4	7485	1	1	1	758.839	3031.33	4	3031.33	-0.0038	1	5.78	0.61	R	SRTSFSPCVPQCQTQGSYGSFTEQHR	S				File4189 Spectrum2522 scans: 5054
28	1	RS19_HUMAN	40S ribosomal protein S19 OS=Homo sapiens GN=RPS19 PE=1 SV=2	210	16051	6	6	5	5	209	1	1	1	367.234	732.453	2	732.453	0	0	37.47	0.00057	R	ALAAFLK	K				File4189 Spectrum3332 scans: 6109
28	1	RS19_HUMAN	40S ribosomal protein S19 OS=Homo sapiens GN=RPS19 PE=1 SV=2	210	16051	6	6	5	5	3031	1	1	1	438.587	1312.74	3	1312.74	-0.0001	1	23.13	0.0068	K	LKVPEWVDTVK	L				File4189 Spectrum3755 scans: 6641
28	1	RS19_HUMAN	40S ribosomal protein S19 OS=Homo sapiens GN=RPS19 PE=1 SV=2	210	16051	6	6	5	5	4063	1	1	1	852.388	1702.76	2	1702.76	-0.0009	0	54.99	1.3e-05	K	ELAPYDENWFYTR	A				File4189 Spectrum5123 scans: 8230
28	1	RS19_HUMAN	40S ribosomal protein S19 OS=Homo sapiens GN=RPS19 PE=1 SV=2	210	16051	6	6	5	5	4107	1	1	1	572.64	1714.9	3	1714.9	-0.0009	1	66.31	6.1e-07	M	PGVTVKDVNQQEFVR	A				File4189 Spectrum2278 scans: 4725
28	1	RS19_HUMAN	40S ribosomal protein S19 OS=Homo sapiens GN=RPS19 PE=1 SV=2	210	16051	6	6	5	5	4108	1	1	1	858.458	1714.9	2	1714.9	0.001	1	62.37	1.4e-06	M	PGVTVKDVNQQEFVR	A				File4189 Spectrum2279 scans: 4727
28	1	RS19_HUMAN	40S ribosomal protein S19 OS=Homo sapiens GN=RPS19 PE=1 SV=2	210	16051	6	6	5	5	4873	1	1	1	656.98	1967.92	3	1967.92	0.0014	1	49.01	2.5e-05	K	HKELAPYDENWFYTR	A				File4189 Spectrum3690 scans: 6561
29	1	TBB4B_HUMAN	Tubulin beta-4B chain OS=Homo sapiens GN=TUBB4B PE=1 SV=1	201	50255	8	7	7	6	3794	1	0	1	801.414	1600.81	2	1600.81	-0.0005	0	39.38	0.00097	R	AVLVDLEPGTMDSVR	S				File4189 Spectrum4305 scans: 7293
29	1	TBB4B_HUMAN	Tubulin beta-4B chain OS=Homo sapiens GN=TUBB4B PE=1 SV=1	201	50255	8	7	7	6	3841	1	0	1	809.412	1616.81	2	1616.81	0.0005	0	52.43	5.3e-05	R	AVLVDLEPGTMDSVR	S	Oxidation (M)	0.000000000010000.0		File4189 Spectrum3537 scans: 6367
29	1	TBB4B_HUMAN	Tubulin beta-4B chain OS=Homo sapiens GN=TUBB4B PE=1 SV=1	201	50255	8	7	7	6	4035	1	1	1	846.438	1690.86	2	1690.86	0.0007	0	24.02	0.0056	R	ALTVPELTQQMFDAK	N				File4189 Spectrum5974 scans: 9189
29	1	TBB4B_HUMAN	Tubulin beta-4B chain OS=Homo sapiens GN=TUBB4B PE=1 SV=1	201	50255	8	7	7	6	4047	1	1	0	848.921	1695.83	2	1695.83	0.0011	0	8.33	0.17	K	NSSYFVEWIPNNVK	T				File4189 Spectrum5523 scans: 8675
29	1	TBB4B_HUMAN	Tubulin beta-4B chain OS=Homo sapiens GN=TUBB4B PE=1 SV=1	201	50255	8	7	7	6	4528	1	1	1	615.315	1842.92	3	1842.93	-0.0025	1	66.37	6e-07	R	INVYYNEATGGKYVPR	A				File4189 Spectrum2637 scans: 5191
29	1	TBB4B_HUMAN	Tubulin beta-4B chain OS=Homo sapiens GN=TUBB4B PE=1 SV=1	201	50255	8	7	7	6	5154	1	1	0	696.364	2086.07	3	2086.07	-0.0002	1	28.48	0.0021	K	GHYTEGAELVDSVLDVVRK	E				File4189 Spectrum6047 scans: 9272
29	1	TBB4B_HUMAN	Tubulin beta-4B chain OS=Homo sapiens GN=TUBB4B PE=1 SV=1	201	50255	8	7	7	6	7032	1	1	0	933.456	2797.34	3	2797.34	0.0086	0	68.05	4.2e-07	R	SGPFGQIFRPDNFVFGQSGAGNNWAK	G				File4189 Spectrum6295 scans: 9558
29	1	TBB4B_HUMAN	Tubulin beta-4B chain OS=Homo sapiens GN=TUBB4B PE=1 SV=1	201	50255	8	7	7	6	7665	1	1	1	779.861	3115.42	4	3115.42	-0.0007	0	28.61	0.0052	K	FWEVISDEHGIDPTGTYHGDSDLQLER	I				File4189 Spectrum4686 scans: 7732
29	2	TBB5_HUMAN	Tubulin beta chain OS=Homo sapiens GN=TUBB PE=1 SV=2	144	50095	6	5	6	5	3834	1	0	1	808.422	1614.83	2	1614.83	-0.0002	0	51.24	3.1e-05	R	AILVDLEPGTMDSVR	S				File4189 Spectrum4689 scans: 7736
29	2	TBB5_HUMAN	Tubulin beta chain OS=Homo sapiens GN=TUBB PE=1 SV=2	144	50095	6	5	6	5	3958	1	0	1	830.452	1658.89	2	1658.89	0.0013	0	29.21	0.0018	R	ALTVPELTQQVFDAK	N				File4189 Spectrum5833 scans: 9027
29	2	TBB5_HUMAN	Tubulin beta chain OS=Homo sapiens GN=TUBB PE=1 SV=2	144	50095	6	5	6	5	4047	1	0	0	848.921	1695.83	2	1695.83	0.0011	0	8.33	0.17	K	NSSYFVEWIPNNVK	T				File4189 Spectrum5523 scans: 8675
29	2	TBB5_HUMAN	Tubulin beta chain OS=Homo sapiens GN=TUBB PE=1 SV=2	144	50095	6	5	6	5	4428	1	0	1	606.312	1815.92	3	1815.92	-0.0004	1	29.5	0.0017	R	ISVYYNEATGGKYVPR	A				File4189 Spectrum2629 scans: 5182
29	2	TBB5_HUMAN	Tubulin beta chain OS=Homo sapiens GN=TUBB PE=1 SV=2	144	50095	6	5	6	5	5154	1	0	0	696.364	2086.07	3	2086.07	-0.0002	1	28.48	0.0021	K	GHYTEGAELVDSVLDVVRK	E				File4189 Spectrum6047 scans: 9272
29	2	TBB5_HUMAN	Tubulin beta chain OS=Homo sapiens GN=TUBB PE=1 SV=2	144	50095	6	5	6	5	7032	1	0	0	933.456	2797.34	3	2797.34	0.0086	0	68.05	4.2e-07	R	SGPFGQIFRPDNFVFGQSGAGNNWAK	G				File4189 Spectrum6295 scans: 9558
29		TBB4A_HUMAN	Tubulin beta-4A chain OS=Homo sapiens GN=TUBB4A PE=1 SV=2	138	50010	6	5	5	4	3794	1	0	1	801.414	1600.81	2	1600.81	-0.0005	0	39.38	0.00097	R	AVLVDLEPGTMDSVR	S				File4189 Spectrum4305 scans: 7293
29		TBB4A_HUMAN	Tubulin beta-4A chain OS=Homo sapiens GN=TUBB4A PE=1 SV=2	138	50010	6	5	5	4	3841	1	0	1	809.412	1616.81	2	1616.81	0.0005	0	52.43	5.3e-05	R	AVLVDLEPGTMDSVR	S	Oxidation (M)	0.000000000010000.0		File4189 Spectrum3537 scans: 6367
29		TBB4A_HUMAN	Tubulin beta-4A chain OS=Homo sapiens GN=TUBB4A PE=1 SV=2	138	50010	6	5	5	4	4035	1	0	1	846.438	1690.86	2	1690.86	0.0007	0	24.02	0.0056	R	ALTVPELTQQMFDAK	N				File4189 Spectrum5974 scans: 9189
29		TBB4A_HUMAN	Tubulin beta-4A chain OS=Homo sapiens GN=TUBB4A PE=1 SV=2	138	50010	6	5	5	4	4047	1	0	0	848.921	1695.83	2	1695.83	0.0011	0	8.33	0.17	K	NSSYFVEWIPNNVK	T				File4189 Spectrum5523 scans: 8675
29		TBB4A_HUMAN	Tubulin beta-4A chain OS=Homo sapiens GN=TUBB4A PE=1 SV=2	138	50010	6	5	5	4	7032	1	0	0	933.456	2797.34	3	2797.34	0.0086	0	68.05	4.2e-07	R	SGPFGQIFRPDNFVFGQSGAGNNWAK	G				File4189 Spectrum6295 scans: 9558
29		TBB4A_HUMAN	Tubulin beta-4A chain OS=Homo sapiens GN=TUBB4A PE=1 SV=2	138	50010	6	5	5	4	7665	1	0	1	779.861	3115.42	4	3115.42	-0.0007	0	28.61	0.0052	K	FWEVISDEHGIDPTGTYHGDSDLQLER	I				File4189 Spectrum4686 scans: 7732
29		TBB2A_HUMAN	Tubulin beta-2A chain OS=Homo sapiens GN=TUBB2A PE=1 SV=1	114	50274	4	3	4	3	3834	1	0	1	808.422	1614.83	2	1614.83	-0.0002	0	51.24	3.1e-05	R	AILVDLEPGTMDSVR	S				File4189 Spectrum4689 scans: 7736
29		TBB2A_HUMAN	Tubulin beta-2A chain OS=Homo sapiens GN=TUBB2A PE=1 SV=1	114	50274	4	3	4	3	4047	1	0	0	848.921	1695.83	2	1695.83	0.0011	0	8.33	0.17	K	NSSYFVEWIPNNVK	T				File4189 Spectrum5523 scans: 8675
29		TBB2A_HUMAN	Tubulin beta-2A chain OS=Homo sapiens GN=TUBB2A PE=1 SV=1	114	50274	4	3	4	3	5154	1	0	0	696.364	2086.07	3	2086.07	-0.0002	1	28.48	0.0021	K	GHYTEGAELVDSVLDVVRK	E				File4189 Spectrum6047 scans: 9272
29		TBB2A_HUMAN	Tubulin beta-2A chain OS=Homo sapiens GN=TUBB2A PE=1 SV=1	114	50274	4	3	4	3	7032	1	0	0	933.456	2797.34	3	2797.34	0.0086	0	68.05	4.2e-07	R	SGPFGQIFRPDNFVFGQSGAGNNWAK	G				File4189 Spectrum6295 scans: 9558
29		TBB3_HUMAN	Tubulin beta-3 chain OS=Homo sapiens GN=TUBB3 PE=1 SV=2	72	50856	4	3	4	3	3834	1	0	1	808.422	1614.83	2	1614.83	-0.0002	0	51.24	3.1e-05	R	AILVDLEPGTMDSVR	S				File4189 Spectrum4689 scans: 7736
29		TBB3_HUMAN	Tubulin beta-3 chain OS=Homo sapiens GN=TUBB3 PE=1 SV=2	72	50856	4	3	4	3	4035	1	0	1	846.438	1690.86	2	1690.86	0.0007	0	24.02	0.0056	R	ALTVPELTQQMFDAK	N				File4189 Spectrum5974 scans: 9189
29		TBB3_HUMAN	Tubulin beta-3 chain OS=Homo sapiens GN=TUBB3 PE=1 SV=2	72	50856	4	3	4	3	4047	1	0	0	848.921	1695.83	2	1695.83	0.0011	0	8.33	0.17	K	NSSYFVEWIPNNVK	V				File4189 Spectrum5523 scans: 8675
29		TBB3_HUMAN	Tubulin beta-3 chain OS=Homo sapiens GN=TUBB3 PE=1 SV=2	72	50856	4	3	4	3	5154	1	0	0	696.364	2086.07	3	2086.07	-0.0002	1	28.48	0.0021	K	GHYTEGAELVDSVLDVVRK	E				File4189 Spectrum6047 scans: 9272
29		TBB8_HUMAN	Tubulin beta-8 chain OS=Homo sapiens GN=TUBB8 PE=1 SV=2	70	50257	2	2	1	1	3794	1	0	1	801.414	1600.81	2	1600.81	-0.0005	0	39.38	0.00097	R	AVLVDLEPGTMDSVR	S				File4189 Spectrum4305 scans: 7293
29		TBB8_HUMAN	Tubulin beta-8 chain OS=Homo sapiens GN=TUBB8 PE=1 SV=2	70	50257	2	2	1	1	3841	1	0	1	809.412	1616.81	2	1616.81	0.0005	0	52.43	5.3e-05	R	AVLVDLEPGTMDSVR	S	Oxidation (M)	0.000000000010000.0		File4189 Spectrum3537 scans: 6367
30	1	FLNA_HUMAN	Filamin-A OS=Homo sapiens GN=FLNA PE=1 SV=4	196	283301	8	6	7	6	2649	1	1	1	613.83	1225.65	2	1225.65	0.0004	0	36.33	0.00039	R	AWGPGLEGGVVGK	S				File4189 Spectrum3241 scans: 5998
30	1	FLNA_HUMAN	Filamin-A OS=Homo sapiens GN=FLNA PE=1 SV=4	196	283301	8	6	7	6	3908	1	1	1	549.63	1645.87	3	1645.87	0.0006	0	37.88	0.00028	K	TGVAVNKPAEFTVDAK	H				File4189 Spectrum2199 scans: 4624
30	1	FLNA_HUMAN	Filamin-A OS=Homo sapiens GN=FLNA PE=1 SV=4	196	283301	8	6	7	6	4615	1	1	1	934.425	1866.84	2	1866.84	0.0003	0	56.62	9.3e-06	R	SPYTVTVGQACNPSACR	A				File4189 Spectrum2028 scans: 4400
30	1	FLNA_HUMAN	Filamin-A OS=Homo sapiens GN=FLNA PE=1 SV=4	196	283301	8	6	7	6	5695	1	1	1	757.722	2270.14	3	2270.14	-0.0006	1	22.22	0.0082	R	AGGPGLERAEAGVPAEFSIWTR	E				File4189 Spectrum5299 scans: 8428
30	1	FLNA_HUMAN	Filamin-A OS=Homo sapiens GN=FLNA PE=1 SV=4	196	283301	8	6	7	6	5803	1	1	1	766.753	2297.24	3	2297.24	-0.0003	1	45.98	4.9e-05	R	ANLPQSFQVDTSKAGVAPLQVK	V				File4189 Spectrum3863 scans: 6779
30	1	FLNA_HUMAN	Filamin-A OS=Homo sapiens GN=FLNA PE=1 SV=4	196	283301	8	6	7	6	7845	1	1	1	1077.17	3228.49	3	3228.5	-0.0023	0	77.99	7.7e-08	R	ALGALVDSCAPGLCPDWDSWDASKPVTNAR	E				File4189 Spectrum5637 scans: 8804
30	1	FLNA_HUMAN	Filamin-A OS=Homo sapiens GN=FLNA PE=1 SV=4	196	283301	8	6	7	6	9810	1	1	1	1143.3	4569.17	4	4569.17	-0.0033	0	11.7	0.26	R	EAMQQADDWLGIPQVITPEEIVDPNVDEHSVMTYLSQFPK	A				File4189 Spectrum8618 scans: 12246
30	1	FLNA_HUMAN	Filamin-A OS=Homo sapiens GN=FLNA PE=1 SV=4	196	283301	8	6	7	6	9811	1	1	1	1524.06	4569.17	3	4569.17	-0.0023	0	8.33	0.57	R	EAMQQADDWLGIPQVITPEEIVDPNVDEHSVMTYLSQFPK	A				File4189 Spectrum8602 scans: 12225
31	1	KPYM_HUMAN	Pyruvate kinase isozymes M1/M2 OS=Homo sapiens GN=PKM PE=1 SV=4	192	58470	10	8	8	7	2449	1	1	1	589.329	1176.64	2	1176.64	0.0003	1	39.82	0.0011	R	SVETLKEMIK	S				File4189 Spectrum2680 scans: 5244
31	1	KPYM_HUMAN	Pyruvate kinase isozymes M1/M2 OS=Homo sapiens GN=PKM PE=1 SV=4	192	58470	10	8	8	7	3170	1	1	1	680.351	1358.69	2	1358.7	-0.0099	0	54.58	3.6e-05	R	NTGIICTIGPASR	S				File4189 Spectrum2691 scans: 5260
31	1	KPYM_HUMAN	Pyruvate kinase isozymes M1/M2 OS=Homo sapiens GN=PKM PE=1 SV=4	192	58470	10	8	8	7	3549	1	1	1	754.439	1506.86	2	1506.86	-0.0003	1	8.6	0.61	R	APIIAVTRNPQTAR	Q				File4189 Spectrum1627 scans: 3882
31	1	KPYM_HUMAN	Pyruvate kinase isozymes M1/M2 OS=Homo sapiens GN=PKM PE=1 SV=4	192	58470	10	8	8	7	3550	1	1	1	503.295	1506.86	3	1506.86	0.0002	1	6.25	0.98	R	APIIAVTRNPQTAR	Q				File4189 Spectrum1643 scans: 3901
31	1	KPYM_HUMAN	Pyruvate kinase isozymes M1/M2 OS=Homo sapiens GN=PKM PE=1 SV=4	192	58470	10	8	8	7	4467	1	1	1	914.515	1827.02	2	1827.01	0.0009	1	28.56	0.0021	R	GDLGIEIPAEKVFLAQK	M				File4189 Spectrum5565 scans: 8721
31	1	KPYM_HUMAN	Pyruvate kinase isozymes M1/M2 OS=Homo sapiens GN=PKM PE=1 SV=4	192	58470	10	8	8	7	5157	1	1	1	696.702	2087.08	3	2087.08	0.0036	1	18.27	0.019	R	EAEAAIYHLQLFEELRR	L				File4189 Spectrum5276 scans: 8401
31	1	KPYM_HUMAN	Pyruvate kinase isozymes M1/M2 OS=Homo sapiens GN=PKM PE=1 SV=4	192	58470	10	8	8	7	5409	1	1	1	1088.06	2174.11	2	2174.11	0.0017	0	55.02	9.9e-06	R	LAPITSDPTEATAVGAVEASFK	C				File4189 Spectrum5627 scans: 8793
31	1	KPYM_HUMAN	Pyruvate kinase isozymes M1/M2 OS=Homo sapiens GN=PKM PE=1 SV=4	192	58470	10	8	8	7	7465	1	1	1	755.153	3016.58	4	3016.59	-0.0028	1	32.86	0.00083	R	TATESFASDPILYRPVAVALDTKGPEIR	T				File4189 Spectrum5682 scans: 8856
31	1	KPYM_HUMAN	Pyruvate kinase isozymes M1/M2 OS=Homo sapiens GN=PKM PE=1 SV=4	192	58470	10	8	8	7	7466	1	1	1	1006.54	3016.59	3	3016.59	-0.0007	1	61.88	1.6e-06	R	TATESFASDPILYRPVAVALDTKGPEIR	T				File4189 Spectrum5699 scans: 8875
31	1	KPYM_HUMAN	Pyruvate kinase isozymes M1/M2 OS=Homo sapiens GN=PKM PE=1 SV=4	192	58470	10	8	8	7	8300	1	1	1	880.197	3516.76	4	3516.75	0.0034	2	20.2	0.013	R	GIFPVLCKDPVQEAWAEDVDLRVNFAMNVGK	A				File4189 Spectrum7175 scans: 10556
31		KPYR_HUMAN	Pyruvate kinase isozymes R/L OS=Homo sapiens GN=PKLR PE=1 SV=2	29	62191	1	1	1	1	4467	1	0	1	914.515	1827.02	2	1827.01	0.0009	1	28.56	0.0021	R	GDLGIEIPAEKVFLAQK	M				File4189 Spectrum5565 scans: 8721
32	1	TBA1B_HUMAN	Tubulin alpha-1B chain OS=Homo sapiens GN=TUBA1B PE=1 SV=1	185	50804	9	7	7	5	4058	1	1	1	851.457	1700.9	2	1700.9	0.0011	0	73.98	4e-07	R	AVFVDLEPTVIDEVR	T				File4189 Spectrum5887 scans: 9090
32	1	TBA1B_HUMAN	Tubulin alpha-1B chain OS=Homo sapiens GN=TUBA1B PE=1 SV=1	185	50804	9	7	7	5	4117	1	1	1	859.944	1717.87	2	1717.87	-0.0011	0	4.06	0.42	R	NLDIERPTYTNLNR	L				File4189 Spectrum2648 scans: 5204
32	1	TBA1B_HUMAN	Tubulin alpha-1B chain OS=Homo sapiens GN=TUBA1B PE=1 SV=1	185	50804	9	7	7	5	4609	1	1	1	932.956	1863.9	2	1863.9	-0.0004	0	9.98	0.12	R	AVCMLSNTTAIAEAWAR	L				File4189 Spectrum5881 scans: 9083
32	1	TBA1B_HUMAN	Tubulin alpha-1B chain OS=Homo sapiens GN=TUBA1B PE=1 SV=1	185	50804	9	7	7	5	5722	1	1	1	1140.6	2279.18	2	2279.18	-0.0034	1	28.26	0.0022	R	AVFVDLEPTVIDEVRTGTYR	Q				File4189 Spectrum5840 scans: 9036
32	1	TBA1B_HUMAN	Tubulin alpha-1B chain OS=Homo sapiens GN=TUBA1B PE=1 SV=1	185	50804	9	7	7	5	5723	1	0	1	760.734	2279.18	3	2279.18	-0.0001	1	37.83	0.00034	R	AVFVDLEPTVIDEVRTGTYR	Q				File4189 Spectrum5822 scans: 9016
32	1	TBA1B_HUMAN	Tubulin alpha-1B chain OS=Homo sapiens GN=TUBA1B PE=1 SV=1	185	50804	9	7	7	5	6125	1	1	1	604.556	2414.2	4	2414.2	-0.0013	1	37.36	0.00031	R	QLFHPEQLITGKEDAANNYAR	G				File4189 Spectrum3473 scans: 6288
32	1	TBA1B_HUMAN	Tubulin alpha-1B chain OS=Homo sapiens GN=TUBA1B PE=1 SV=1	185	50804	9	7	7	5	6126	1	1	1	805.74	2414.2	3	2414.2	0.0005	1	46.74	4.1e-05	R	QLFHPEQLITGKEDAANNYAR	G				File4189 Spectrum3479 scans: 6295
32	1	TBA1B_HUMAN	Tubulin alpha-1B chain OS=Homo sapiens GN=TUBA1B PE=1 SV=1	185	50804	9	7	7	5	8112	1	1	1	1130.91	3389.71	3	3389.71	-0.0022	1	26.47	0.0033	R	SIQFVDWCPTGFKVGINYQPPTVVPGGDLAK	V				File4189 Spectrum6639 scans: 9945
32	1	TBA1B_HUMAN	Tubulin alpha-1B chain OS=Homo sapiens GN=TUBA1B PE=1 SV=1	185	50804	9	7	7	5	8875	1	1	1	970.273	3877.06	4	3877.06	-0.0011	1	31.61	0.0021	R	LISQIVSSITASLRFDGALNVDLTEFQTNLVPYPR	I				File4189 Spectrum9510 scans: 13564
32		TBA1C_HUMAN	Tubulin alpha-1C chain OS=Homo sapiens GN=TUBA1C PE=1 SV=1	173	50548	7	6	5	4	4058	1	0	1	851.457	1700.9	2	1700.9	0.0011	0	73.98	4e-07	R	AVFVDLEPTVIDEVR	T				File4189 Spectrum5887 scans: 9090
32		TBA1C_HUMAN	Tubulin alpha-1C chain OS=Homo sapiens GN=TUBA1C PE=1 SV=1	173	50548	7	6	5	4	4117	1	0	1	859.944	1717.87	2	1717.87	-0.0011	0	4.06	0.42	R	NLDIERPTYTNLNR	L				File4189 Spectrum2648 scans: 5204
32		TBA1C_HUMAN	Tubulin alpha-1C chain OS=Homo sapiens GN=TUBA1C PE=1 SV=1	173	50548	7	6	5	4	5722	1	0	1	1140.6	2279.18	2	2279.18	-0.0034	1	28.26	0.0022	R	AVFVDLEPTVIDEVRTGTYR	Q				File4189 Spectrum5840 scans: 9036
32		TBA1C_HUMAN	Tubulin alpha-1C chain OS=Homo sapiens GN=TUBA1C PE=1 SV=1	173	50548	7	6	5	4	5723	1	0	1	760.734	2279.18	3	2279.18	-0.0001	1	37.83	0.00034	R	AVFVDLEPTVIDEVRTGTYR	Q				File4189 Spectrum5822 scans: 9016
32		TBA1C_HUMAN	Tubulin alpha-1C chain OS=Homo sapiens GN=TUBA1C PE=1 SV=1	173	50548	7	6	5	4	6125	1	0	1	604.556	2414.2	4	2414.2	-0.0013	1	37.36	0.00031	R	QLFHPEQLITGKEDAANNYAR	G				File4189 Spectrum3473 scans: 6288
32		TBA1C_HUMAN	Tubulin alpha-1C chain OS=Homo sapiens GN=TUBA1C PE=1 SV=1	173	50548	7	6	5	4	6126	1	0	1	805.74	2414.2	3	2414.2	0.0005	1	46.74	4.1e-05	R	QLFHPEQLITGKEDAANNYAR	G				File4189 Spectrum3479 scans: 6295
32		TBA1C_HUMAN	Tubulin alpha-1C chain OS=Homo sapiens GN=TUBA1C PE=1 SV=1	173	50548	7	6	5	4	8875	1	0	1	970.273	3877.06	4	3877.06	-0.0011	1	31.61	0.0021	R	LISQIVSSITASLRFDGALNVDLTEFQTNLVPYPR	I				File4189 Spectrum9510 scans: 13564
32		TBA1A_HUMAN	Tubulin alpha-1A chain OS=Homo sapiens GN=TUBA1A PE=1 SV=1	159	50788	7	5	5	3	4058	1	0	1	851.457	1700.9	2	1700.9	0.0011	0	73.98	4e-07	R	AVFVDLEPTVIDEVR	T				File4189 Spectrum5887 scans: 9090
32		TBA1A_HUMAN	Tubulin alpha-1A chain OS=Homo sapiens GN=TUBA1A PE=1 SV=1	159	50788	7	5	5	3	4117	1	0	1	859.944	1717.87	2	1717.87	-0.0011	0	4.06	0.42	R	NLDIERPTYTNLNR	L				File4189 Spectrum2648 scans: 5204
32		TBA1A_HUMAN	Tubulin alpha-1A chain OS=Homo sapiens GN=TUBA1A PE=1 SV=1	159	50788	7	5	5	3	4609	1	0	1	932.956	1863.9	2	1863.9	-0.0004	0	9.98	0.12	R	AVCMLSNTTAIAEAWAR	L				File4189 Spectrum5881 scans: 9083
32		TBA1A_HUMAN	Tubulin alpha-1A chain OS=Homo sapiens GN=TUBA1A PE=1 SV=1	159	50788	7	5	5	3	5722	1	0	1	1140.6	2279.18	2	2279.18	-0.0034	1	28.26	0.0022	R	AVFVDLEPTVIDEVRTGTYR	Q				File4189 Spectrum5840 scans: 9036
32		TBA1A_HUMAN	Tubulin alpha-1A chain OS=Homo sapiens GN=TUBA1A PE=1 SV=1	159	50788	7	5	5	3	5723	1	0	1	760.734	2279.18	3	2279.18	-0.0001	1	37.83	0.00034	R	AVFVDLEPTVIDEVRTGTYR	Q				File4189 Spectrum5822 scans: 9016
32		TBA1A_HUMAN	Tubulin alpha-1A chain OS=Homo sapiens GN=TUBA1A PE=1 SV=1	159	50788	7	5	5	3	6125	1	0	1	604.556	2414.2	4	2414.2	-0.0013	1	37.36	0.00031	R	QLFHPEQLITGKEDAANNYAR	G				File4189 Spectrum3473 scans: 6288
32		TBA1A_HUMAN	Tubulin alpha-1A chain OS=Homo sapiens GN=TUBA1A PE=1 SV=1	159	50788	7	5	5	3	6126	1	0	1	805.74	2414.2	3	2414.2	0.0005	1	46.74	4.1e-05	R	QLFHPEQLITGKEDAANNYAR	G				File4189 Spectrum3479 scans: 6295
32		TBA4A_HUMAN	Tubulin alpha-4A chain OS=Homo sapiens GN=TUBA4A PE=1 SV=1	96	50634	6	4	5	3	4117	1	0	1	859.944	1717.87	2	1717.87	-0.0011	0	4.06	0.42	R	NLDIERPTYTNLNR	L				File4189 Spectrum2648 scans: 5204
32		TBA4A_HUMAN	Tubulin alpha-4A chain OS=Homo sapiens GN=TUBA4A PE=1 SV=1	96	50634	6	4	5	3	4609	1	0	1	932.956	1863.9	2	1863.9	-0.0004	0	9.98	0.12	R	AVCMLSNTTAIAEAWAR	L				File4189 Spectrum5881 scans: 9083
32		TBA4A_HUMAN	Tubulin alpha-4A chain OS=Homo sapiens GN=TUBA4A PE=1 SV=1	96	50634	6	4	5	3	6125	1	0	1	604.556	2414.2	4	2414.2	-0.0013	1	37.36	0.00031	R	QLFHPEQLITGKEDAANNYAR	G				File4189 Spectrum3473 scans: 6288
32		TBA4A_HUMAN	Tubulin alpha-4A chain OS=Homo sapiens GN=TUBA4A PE=1 SV=1	96	50634	6	4	5	3	6126	1	0	1	805.74	2414.2	3	2414.2	0.0005	1	46.74	4.1e-05	R	QLFHPEQLITGKEDAANNYAR	G				File4189 Spectrum3479 scans: 6295
32		TBA4A_HUMAN	Tubulin alpha-4A chain OS=Homo sapiens GN=TUBA4A PE=1 SV=1	96	50634	6	4	5	3	8112	1	0	1	1130.91	3389.71	3	3389.71	-0.0022	1	26.47	0.0033	R	SIQFVDWCPTGFKVGINYQPPTVVPGGDLAK	V				File4189 Spectrum6639 scans: 9945
32		TBA4A_HUMAN	Tubulin alpha-4A chain OS=Homo sapiens GN=TUBA4A PE=1 SV=1	96	50634	6	4	5	3	8875	1	0	1	970.273	3877.06	4	3877.06	-0.0011	1	31.61	0.0021	R	LISQIVSSITASLRFDGALNVDLTEFQTNLVPYPR	I				File4189 Spectrum9510 scans: 13564
32		TBA8_HUMAN	Tubulin alpha-8 chain OS=Homo sapiens GN=TUBA8 PE=1 SV=1	84	50746	5	3	4	2	4117	1	0	1	859.944	1717.87	2	1717.87	-0.0011	0	4.06	0.42	R	NLDIERPTYTNLNR	L				File4189 Spectrum2648 scans: 5204
32		TBA8_HUMAN	Tubulin alpha-8 chain OS=Homo sapiens GN=TUBA8 PE=1 SV=1	84	50746	5	3	4	2	4609	1	0	1	932.956	1863.9	2	1863.9	-0.0004	0	9.98	0.12	R	AVCMLSNTTAIAEAWAR	L				File4189 Spectrum5881 scans: 9083
32		TBA8_HUMAN	Tubulin alpha-8 chain OS=Homo sapiens GN=TUBA8 PE=1 SV=1	84	50746	5	3	4	2	6125	1	0	1	604.556	2414.2	4	2414.2	-0.0013	1	37.36	0.00031	R	QLFHPEQLITGKEDAANNYAR	G				File4189 Spectrum3473 scans: 6288
32		TBA8_HUMAN	Tubulin alpha-8 chain OS=Homo sapiens GN=TUBA8 PE=1 SV=1	84	50746	5	3	4	2	6126	1	0	1	805.74	2414.2	3	2414.2	0.0005	1	46.74	4.1e-05	R	QLFHPEQLITGKEDAANNYAR	G				File4189 Spectrum3479 scans: 6295
32		TBA8_HUMAN	Tubulin alpha-8 chain OS=Homo sapiens GN=TUBA8 PE=1 SV=1	84	50746	5	3	4	2	8875	1	0	1	970.273	3877.06	4	3877.06	-0.0011	1	31.61	0.0021	R	LISQIVSSITASLRFDGALNVDLTEFQTNLVPYPR	I				File4189 Spectrum9510 scans: 13564
32		TBA3C_HUMAN	Tubulin alpha-3C/D chain OS=Homo sapiens GN=TUBA3C PE=1 SV=3	69	50612	4	2	3	1	4117	1	0	1	859.944	1717.87	2	1717.87	-0.0011	0	4.06	0.42	R	NLDIERPTYTNLNR	L				File4189 Spectrum2648 scans: 5204
32		TBA3C_HUMAN	Tubulin alpha-3C/D chain OS=Homo sapiens GN=TUBA3C PE=1 SV=3	69	50612	4	2	3	1	4609	1	0	1	932.956	1863.9	2	1863.9	-0.0004	0	9.98	0.12	R	AVCMLSNTTAIAEAWAR	L				File4189 Spectrum5881 scans: 9083
32		TBA3C_HUMAN	Tubulin alpha-3C/D chain OS=Homo sapiens GN=TUBA3C PE=1 SV=3	69	50612	4	2	3	1	6125	1	0	1	604.556	2414.2	4	2414.2	-0.0013	1	37.36	0.00031	R	QLFHPEQLITGKEDAANNYAR	G				File4189 Spectrum3473 scans: 6288
32		TBA3C_HUMAN	Tubulin alpha-3C/D chain OS=Homo sapiens GN=TUBA3C PE=1 SV=3	69	50612	4	2	3	1	6126	1	0	1	805.74	2414.2	3	2414.2	0.0005	1	46.74	4.1e-05	R	QLFHPEQLITGKEDAANNYAR	G				File4189 Spectrum3479 scans: 6295
33	1	H2B1B_HUMAN	Histone H2B type 1-B OS=Homo sapiens GN=HIST1H2BB PE=1 SV=2	183	13942	6	5	5	4	1268	1	1	1	477.305	952.595	2	952.596	-0.0003	0	34.85	0.00052	R	LLLPGELAK	H				File4189 Spectrum3718 scans: 6596
33	1	H2B1B_HUMAN	Histone H2B type 1-B OS=Homo sapiens GN=HIST1H2BB PE=1 SV=2	183	13942	6	5	5	4	3428	1	1	1	731.405	1460.8	2	1460.79	0.0007	1	12.66	0.42	R	STITSREIQTAVR	L				File4189 Spectrum1646 scans: 3904
33	1	H2B1B_HUMAN	Histone H2B type 1-B OS=Homo sapiens GN=HIST1H2BB PE=1 SV=2	183	13942	6	5	5	4	4185	1	1	1	872.412	1742.81	2	1742.81	-0.002	0	91.53	4.9e-09	K	AMGIMNSFVNDIFER	I				File4189 Spectrum7196 scans: 10579
33	1	H2B1B_HUMAN	Histone H2B type 1-B OS=Homo sapiens GN=HIST1H2BB PE=1 SV=2	183	13942	6	5	5	4	4318	1	1	1	598.652	1792.93	3	1792.93	0.0014	2	23.09	0.0068	K	HAVSEGTKAVTKYTSSK	-				File4189 Spectrum363 scans: 2301
33	1	H2B1B_HUMAN	Histone H2B type 1-B OS=Homo sapiens GN=HIST1H2BB PE=1 SV=2	183	13942	6	5	5	4	6166	1	1	1	810.06	2427.16	3	2427.17	-0.0088	1	62.99	2.2e-06	K	AMGIMNSFVNDIFERIAGEASR	L				File4189 Spectrum8616 scans: 12243
33	1	H2B1B_HUMAN	Histone H2B type 1-B OS=Homo sapiens GN=HIST1H2BB PE=1 SV=2	183	13942	6	5	5	4	6168	1	1	1	810.064	2427.17	3	2427.17	0.0015	1	38.05	0.00027	K	AMGIMNSFVNDIFERIAGEASR	L				File4189 Spectrum8665 scans: 12309
33		H2B1J_HUMAN	Histone H2B type 1-J OS=Homo sapiens GN=HIST1H2BJ PE=1 SV=3	175	13896	5	4	4	3	1268	1	0	1	477.305	952.595	2	952.596	-0.0003	0	34.85	0.00052	R	LLLPGELAK	H				File4189 Spectrum3718 scans: 6596
33		H2B1J_HUMAN	Histone H2B type 1-J OS=Homo sapiens GN=HIST1H2BJ PE=1 SV=3	175	13896	5	4	4	3	3428	1	0	1	731.405	1460.8	2	1460.79	0.0007	1	12.66	0.42	R	STITSREIQTAVR	L				File4189 Spectrum1646 scans: 3904
33		H2B1J_HUMAN	Histone H2B type 1-J OS=Homo sapiens GN=HIST1H2BJ PE=1 SV=3	175	13896	5	4	4	3	4185	1	0	1	872.412	1742.81	2	1742.81	-0.002	0	91.53	4.9e-09	K	AMGIMNSFVNDIFER	I				File4189 Spectrum7196 scans: 10579
33		H2B1J_HUMAN	Histone H2B type 1-J OS=Homo sapiens GN=HIST1H2BJ PE=1 SV=3	175	13896	5	4	4	3	6166	1	0	1	810.06	2427.16	3	2427.17	-0.0088	1	62.99	2.2e-06	K	AMGIMNSFVNDIFERIAGEASR	L				File4189 Spectrum8616 scans: 12243
33		H2B1J_HUMAN	Histone H2B type 1-J OS=Homo sapiens GN=HIST1H2BJ PE=1 SV=3	175	13896	5	4	4	3	6168	1	0	1	810.064	2427.17	3	2427.17	0.0015	1	38.05	0.00027	K	AMGIMNSFVNDIFERIAGEASR	L				File4189 Spectrum8665 scans: 12309
33		H2B1L_HUMAN	Histone H2B type 1-L OS=Homo sapiens GN=HIST1H2BL PE=1 SV=3	116	13944	4	3	4	3	1268	1	0	1	477.305	952.595	2	952.596	-0.0003	0	34.85	0.00052	R	LLLPGELAK	H				File4189 Spectrum3718 scans: 6596
33		H2B1L_HUMAN	Histone H2B type 1-L OS=Homo sapiens GN=HIST1H2BL PE=1 SV=3	116	13944	4	3	4	3	3428	1	0	1	731.405	1460.8	2	1460.79	0.0007	1	12.66	0.42	R	STITSREIQTAVR	L				File4189 Spectrum1646 scans: 3904
33		H2B1L_HUMAN	Histone H2B type 1-L OS=Homo sapiens GN=HIST1H2BL PE=1 SV=3	116	13944	4	3	4	3	4185	1	0	1	872.412	1742.81	2	1742.81	-0.002	0	91.53	4.9e-09	K	AMGIMNSFVNDIFER	I				File4189 Spectrum7196 scans: 10579
33		H2B1L_HUMAN	Histone H2B type 1-L OS=Homo sapiens GN=HIST1H2BL PE=1 SV=3	116	13944	4	3	4	3	4318	1	0	1	598.652	1792.93	3	1792.93	0.0014	2	23.09	0.0068	K	HAVSEGTKAVTKYTSSK	-				File4189 Spectrum363 scans: 2301
33		H2B1A_HUMAN	Histone H2B type 1-A OS=Homo sapiens GN=HIST1H2BA PE=1 SV=3	43	14159	2	2	2	2	1268	1	0	1	477.305	952.595	2	952.596	-0.0003	0	34.85	0.00052	R	LLLPGELAK	H				File4189 Spectrum3718 scans: 6596
33		H2B1A_HUMAN	Histone H2B type 1-A OS=Homo sapiens GN=HIST1H2BA PE=1 SV=3	43	14159	2	2	2	2	4318	1	0	1	598.652	1792.93	3	1792.93	0.0014	2	23.09	0.0068	K	HAVSEGTKAVTKYTSSK	-				File4189 Spectrum363 scans: 2301
33		CU129_HUMAN	Putative uncharacterized protein encoded by LINC00479 OS=Homo sapiens GN=LINC00479 PE=5 SV=2	35	15541	1	1	1	1	1268	1	0	1	477.305	952.595	2	952.597	-0.0016	1	34.85	0.00052	R	LLIPRWR	E				File4189 Spectrum3718 scans: 6596
34	1	ROA2_HUMAN	Heterogeneous nuclear ribonucleoproteins A2/B1 OS=Homo sapiens GN=HNRNPA2B1 PE=1 SV=2	179	37464	6	6	5	5	2622	1	1	1	611.28	1220.55	2	1220.55	0	0	35.65	0.0012	R	QEMQEVQSSR	S				File4189 Spectrum188 scans: 2086
34	1	ROA2_HUMAN	Heterogeneous nuclear ribonucleoproteins A2/B1 OS=Homo sapiens GN=HNRNPA2B1 PE=1 SV=2	179	37464	6	6	5	5	3916	1	1	1	824.907	1647.8	2	1647.8	0.0004	1	42.41	0.00018	K	ALSRQEMQEVQSSR	S				File4189 Spectrum920 scans: 2994
34	1	ROA2_HUMAN	Heterogeneous nuclear ribonucleoproteins A2/B1 OS=Homo sapiens GN=HNRNPA2B1 PE=1 SV=2	179	37464	6	6	5	5	3917	1	1	1	550.274	1647.8	3	1647.8	0.0005	1	27.14	0.0028	K	ALSRQEMQEVQSSR	S				File4189 Spectrum911 scans: 2984
34	1	ROA2_HUMAN	Heterogeneous nuclear ribonucleoproteins A2/B1 OS=Homo sapiens GN=HNRNPA2B1 PE=1 SV=2	179	37464	6	6	5	5	5440	1	1	1	1095.46	2188.9	2	2188.9	0.0009	0	102.32	5.9e-11	R	NMGGPYGGGNYGPGGSGGSGGYGGR	S				File4189 Spectrum1915 scans: 4249
34	1	ROA2_HUMAN	Heterogeneous nuclear ribonucleoproteins A2/B1 OS=Homo sapiens GN=HNRNPA2B1 PE=1 SV=2	179	37464	6	6	5	5	5693	1	1	1	757.669	2269.98	3	2269.99	-0.0009	1	18	0.034	R	GGGGNFGPGPGSNFRGGSDGYGSGR	G				File4189 Spectrum1849 scans: 4157
34	1	ROA2_HUMAN	Heterogeneous nuclear ribonucleoproteins A2/B1 OS=Homo sapiens GN=HNRNPA2B1 PE=1 SV=2	179	37464	6	6	5	5	5714	1	1	1	759.722	2276.14	3	2276.15	-0.0031	1	30.62	0.0013	R	GFGFVTFDDHDPVDKIVLQK	Y				File4189 Spectrum5561 scans: 8717
35	1	RAC1_HUMAN	Ras-related C3 botulinum toxin substrate 1 OS=Homo sapiens GN=RAC1 PE=1 SV=1	174	21835	4	4	3	3	2712	1	1	1	620.803	1239.59	2	1239.59	0.0001	0	47.96	3.2e-05	K	YLECSALTQR	G				File4189 Spectrum1930 scans: 4273
35	1	RAC1_HUMAN	Ras-related C3 botulinum toxin substrate 1 OS=Homo sapiens GN=RAC1 PE=1 SV=1	174	21835	4	4	3	3	3538	1	1	1	752.415	1502.82	2	1502.82	-0.0005	0	53.24	1e-05	K	LTPITYPQGLAMAK	E				File4189 Spectrum4104 scans: 7056
35	1	RAC1_HUMAN	Ras-related C3 botulinum toxin substrate 1 OS=Homo sapiens GN=RAC1 PE=1 SV=1	174	21835	4	4	3	3	4504	1	1	1	613.321	1836.94	3	1836.94	0.0002	1	22.33	0.0084	K	EIGAVKYLECSALTQR	G				File4189 Spectrum4026 scans: 6966
35	1	RAC1_HUMAN	Ras-related C3 botulinum toxin substrate 1 OS=Homo sapiens GN=RAC1 PE=1 SV=1	174	21835	4	4	3	3	4505	1	1	1	919.478	1836.94	2	1836.94	0.0012	1	101.66	6.8e-10	K	EIGAVKYLECSALTQR	G				File4189 Spectrum4005 scans: 6941
35		RAC2_HUMAN	Ras-related C3 botulinum toxin substrate 2 OS=Homo sapiens GN=RAC2 PE=1 SV=1	48	21814	1	1	1	1	2712	1	0	1	620.803	1239.59	2	1239.59	0.0001	0	47.96	3.2e-05	K	YLECSALTQR	G				File4189 Spectrum1930 scans: 4273
36	1	ANXA2_HUMAN	Annexin A2 OS=Homo sapiens GN=ANXA2 PE=1 SV=2	172	38808	3	3	3	3	257	1	1	1	373.235	744.456	2	744.457	-0.0004	0	37.06	0.0022	K	LMVALAK	G				File4189 Spectrum2377 scans: 4851
36	1	ANXA2_HUMAN	Annexin A2 OS=Homo sapiens GN=ANXA2 PE=1 SV=2	172	38808	3	3	3	3	3638	1	1	1	771.928	1541.84	2	1541.84	0.0003	0	76.1	2.7e-07	K	GVDEVTIVNILTNR	S				File4189 Spectrum6232 scans: 9485
36	1	ANXA2_HUMAN	Annexin A2 OS=Homo sapiens GN=ANXA2 PE=1 SV=2	172	38808	3	3	3	3	4288	1	1	1	889.435	1776.86	2	1776.86	-0.0007	0	101.91	2.8e-10	K	GLGTDEDSLIEIICSR	T				File4189 Spectrum6236 scans: 9489
36		AXA2L_HUMAN	Putative annexin A2-like protein OS=Homo sapiens GN=ANXA2P2 PE=5 SV=2	118	38806	2	2	2	2	257	1	0	1	373.235	744.456	2	744.457	-0.0004	0	37.06	0.0022	K	LMVALAK	G				File4189 Spectrum2377 scans: 4851
36		AXA2L_HUMAN	Putative annexin A2-like protein OS=Homo sapiens GN=ANXA2P2 PE=5 SV=2	118	38806	2	2	2	2	4288	1	0	1	889.435	1776.86	2	1776.86	-0.0007	0	101.91	2.8e-10	K	GLGTDEDSLIEIICSR	T				File4189 Spectrum6236 scans: 9489
37	1	SERPH_HUMAN	Serpin H1 OS=Homo sapiens GN=SERPINH1 PE=1 SV=2	164	46525	5	5	4	4	3955	1	1	1	830.404	1658.79	2	1658.79	-0.0006	0	40.85	0.00015	R	LYGPSSVSFADDFVR	S				File4189 Spectrum5236 scans: 8357
37	1	SERPH_HUMAN	Serpin H1 OS=Homo sapiens GN=SERPINH1 PE=1 SV=2	164	46525	5	5	4	4	3956	1	1	1	830.405	1658.8	2	1658.79	0.0013	0	67.03	6.2e-07	R	LYGPSSVSFADDFVR	S				File4189 Spectrum5146 scans: 8256
37	1	SERPH_HUMAN	Serpin H1 OS=Homo sapiens GN=SERPINH1 PE=1 SV=2	164	46525	5	5	4	4	6097	1	1	1	802.431	2404.27	3	2404.27	-0.0008	1	35.31	0.0021	K	AVLSAEQLRDEEVHAGLGELLR	S				File4189 Spectrum5020 scans: 8113
37	1	SERPH_HUMAN	Serpin H1 OS=Homo sapiens GN=SERPINH1 PE=1 SV=2	164	46525	5	5	4	4	9006	1	1	1	1330.73	3989.16	3	3989.15	0.0053	1	53.88	7.8e-06	R	SAGLAFSLYQAMAKDQAVENILVSPVVVASSLGLVSLGGK	A				File4189 Spectrum9720 scans: 13993
37	1	SERPH_HUMAN	Serpin H1 OS=Homo sapiens GN=SERPINH1 PE=1 SV=2	164	46525	5	5	4	4	10034	1	1	1	1187.9	4747.55	4	4747.55	0.005	2	32.99	0.00075	R	SAGLAFSLYQAMAKDQAVENILVSPVVVASSLGLVSLGGKATTASQAK	A				File4189 Spectrum9406 scans: 13375
38	1	NONO_HUMAN	Non-POU domain-containing octamer-binding protein OS=Homo sapiens GN=NONO PE=1 SV=4	162	54311	4	4	4	4	2655	1	1	1	410.219	1227.64	3	1227.64	0.0004	1	35.21	0.0005	R	AAPGAEFAPNKR	R				File4189 Spectrum746 scans: 2780
38	1	NONO_HUMAN	Non-POU domain-containing octamer-binding protein OS=Homo sapiens GN=NONO PE=1 SV=4	162	54311	4	4	4	4	3627	1	1	1	769.832	1537.65	2	1537.66	-0.0124	0	53.97	5.6e-06	R	MGQMAMGGAMGINNR	G				File4189 Spectrum2760 scans: 5358
38	1	NONO_HUMAN	Non-POU domain-containing octamer-binding protein OS=Homo sapiens GN=NONO PE=1 SV=4	162	54311	4	4	4	4	5390	1	1	1	1082.04	2162.06	2	2162.06	-0.0016	0	101.97	2.7e-10	R	FGQAATMEGIGAIGGTPPAFNR	A				File4189 Spectrum4670 scans: 7713
38	1	NONO_HUMAN	Non-POU domain-containing octamer-binding protein OS=Homo sapiens GN=NONO PE=1 SV=4	162	54311	4	4	4	4	6763	1	1	1	890.113	2667.32	3	2667.32	-0.0022	0	17.83	0.021	R	NLPQYVSNELLEEAFSVFGQVER	A				File4189 Spectrum9497 scans: 13534
39	1	CTNB1_HUMAN	Catenin beta-1 OS=Homo sapiens GN=CTNNB1 PE=1 SV=1	160	86069	5	5	4	4	3209	1	1	1	690.315	1378.62	2	1378.61	0.0005	0	56.67	1e-05	R	TMQNTNDVETAR	C				File4189 Spectrum309 scans: 2234
39	1	CTNB1_HUMAN	Catenin beta-1 OS=Homo sapiens GN=CTNNB1 PE=1 SV=1	160	86069	5	5	4	4	5049	1	1	1	681.348	2041.02	3	2041.02	-0.0006	0	28.95	0.0019	K	HAVVNLINYQDDAELATR	A				File4189 Spectrum3747 scans: 6631
39	1	CTNB1_HUMAN	Catenin beta-1 OS=Homo sapiens GN=CTNNB1 PE=1 SV=1	160	86069	5	5	4	4	5050	1	1	1	1021.52	2041.02	2	2041.02	0.0002	0	89.37	4.2e-09	K	HAVVNLINYQDDAELATR	A				File4189 Spectrum3760 scans: 6647
39	1	CTNB1_HUMAN	Catenin beta-1 OS=Homo sapiens GN=CTNNB1 PE=1 SV=1	160	86069	5	5	4	4	6169	1	1	1	810.125	2427.35	3	2427.35	0.0015	0	27.92	0.0056	R	GLNTIPLFVQLLYSPIENIQR	V				File4189 Spectrum9304 scans: 13196
39	1	CTNB1_HUMAN	Catenin beta-1 OS=Homo sapiens GN=CTNNB1 PE=1 SV=1	160	86069	5	5	4	4	7807	1	1	1	1068.17	3201.48	3	3201.49	-0.0053	0	23.76	0.0059	R	AAMFPETLDEGMQIPSTQFDAAHPTNVQR	L				File4189 Spectrum5451 scans: 8597
40	1	ROA1_HUMAN	Heterogeneous nuclear ribonucleoprotein A1 OS=Homo sapiens GN=HNRNPA1 PE=1 SV=5	159	38837	2	2	2	2	3860	1	1	1	543.599	1627.77	3	1627.77	0.0005	0	61.2	1.8e-06	R	SSGPYGGGGQYFAKPR	N				File4189 Spectrum1695 scans: 3960
40	1	ROA1_HUMAN	Heterogeneous nuclear ribonucleoprotein A1 OS=Homo sapiens GN=HNRNPA1 PE=1 SV=5	159	38837	2	2	2	2	4040	1	1	1	847.853	1693.69	2	1693.69	-0.0005	0	112.26	5.9e-12	R	NQGGYGGSSSSSSYGSGR	R				File4189 Spectrum200 scans: 2100
41	1	AT2A2_HUMAN	Sarcoplasmic/endoplasmic reticulum calcium ATPase 2 OS=Homo sapiens GN=ATP2A2 PE=1 SV=1	159	116336	8	4	7	4	3594	1	1	1	763.858	1525.7	2	1525.7	-0.0009	0	31.41	0.0011	K	SMSVYCTPNKPSR	T				File4189 Spectrum900 scans: 2971
41	1	AT2A2_HUMAN	Sarcoplasmic/endoplasmic reticulum calcium ATPase 2 OS=Homo sapiens GN=ATP2A2 PE=1 SV=1	159	116336	8	4	7	4	4503	1	1	1	613.299	1836.88	3	1836.88	0.0005	1	10.06	0.11	K	AFTGREFDELNPSAQR	D				File4189 Spectrum2960 scans: 5616
41	1	AT2A2_HUMAN	Sarcoplasmic/endoplasmic reticulum calcium ATPase 2 OS=Homo sapiens GN=ATP2A2 PE=1 SV=1	159	116336	8	4	7	4	6286	1	1	1	824.76	2471.26	3	2471.25	0.0031	0	39.26	0.00021	K	TVEEVLGHFGVNESTGLSLEQVK	K				File4189 Spectrum5585 scans: 8745
41	1	AT2A2_HUMAN	Sarcoplasmic/endoplasmic reticulum calcium ATPase 2 OS=Homo sapiens GN=ATP2A2 PE=1 SV=1	159	116336	8	4	7	4	6607	1	1	1	650.844	2599.35	4	2599.35	-0.0017	1	3.79	0.44	K	TVEEVLGHFGVNESTGLSLEQVKK	L				File4189 Spectrum4875 scans: 7947
41	1	AT2A2_HUMAN	Sarcoplasmic/endoplasmic reticulum calcium ATPase 2 OS=Homo sapiens GN=ATP2A2 PE=1 SV=1	159	116336	8	4	7	4	6608	1	1	1	867.457	2599.35	3	2599.35	0.0014	1	71.6	1.9e-07	K	TVEEVLGHFGVNESTGLSLEQVKK	L				File4189 Spectrum4852 scans: 7920
41	1	AT2A2_HUMAN	Sarcoplasmic/endoplasmic reticulum calcium ATPase 2 OS=Homo sapiens GN=ATP2A2 PE=1 SV=1	159	116336	8	4	7	4	6677	1	1	1	880.085	2637.23	3	2637.24	-0.0023	2	11.9	0.076	K	AFTGREFDELNPSAQRDACLNAR	C				File4189 Spectrum3097 scans: 5809
41	1	AT2A2_HUMAN	Sarcoplasmic/endoplasmic reticulum calcium ATPase 2 OS=Homo sapiens GN=ATP2A2 PE=1 SV=1	159	116336	8	4	7	4	6989	1	1	1	1391.18	2780.35	2	2780.36	-0.0074	0	9.05	0.14	K	IVEFLQSFDEITAMTGDGVNDAPALK	K				File4189 Spectrum7483 scans: 10912
41	1	AT2A2_HUMAN	Sarcoplasmic/endoplasmic reticulum calcium ATPase 2 OS=Homo sapiens GN=ATP2A2 PE=1 SV=1	159	116336	8	4	7	4	9524	1	1	1	1067.3	4265.16	4	4265.16	0.0038	2	62.82	1.3e-06	K	IVEFLQSFDEITAMTGDGVNDAPALKKAEIGIAMGSGTAVAK	T				File4189 Spectrum7333 scans: 10736
42	1	RL12_HUMAN	60S ribosomal protein L12 OS=Homo sapiens GN=RPL12 PE=1 SV=1	154	17979	5	4	5	4	3304	1	1	1	709.851	1417.69	2	1417.69	0	0	90.29	8e-09	R	CTGGEVGATSALAPK	I				File4189 Spectrum1547 scans: 3775
42	1	RL12_HUMAN	60S ribosomal protein L12 OS=Homo sapiens GN=RPL12 PE=1 SV=1	154	17979	5	4	5	4	3967	1	1	1	833.99	1665.97	2	1665.97	-0.0001	0	47.61	4.2e-05	R	QAQIEVVPSASALIIK	A				File4189 Spectrum4965 scans: 8050
42	1	RL12_HUMAN	60S ribosomal protein L12 OS=Homo sapiens GN=RPL12 PE=1 SV=1	154	17979	5	4	5	4	4017	1	1	1	562.625	1684.85	3	1684.85	0.0008	0	23.6	0.0061	K	HSGNITFDEIVNIAR	Q				File4189 Spectrum4919 scans: 7997
42	1	RL12_HUMAN	60S ribosomal protein L12 OS=Homo sapiens GN=RPL12 PE=1 SV=1	154	17979	5	4	5	4	5041	1	1	1	681.032	2040.07	3	2040.08	-0.0016	1	42.57	0.0001	K	NIKHSGNITFDEIVNIAR	Q				File4189 Spectrum4414 scans: 7418
42	1	RL12_HUMAN	60S ribosomal protein L12 OS=Homo sapiens GN=RPL12 PE=1 SV=1	154	17979	5	4	5	4	9671	1	1	1	1108.79	4431.11	4	4431.11	0.0044	2	3.57	2.1	R	ELSGTIKEILGTAQSVGCNVDGRHPHDIIDDINSGAVECPAS	-				File4189 Spectrum6517 scans: 9814
43	1	ITB4_HUMAN	Integrin beta-4 OS=Homo sapiens GN=ITGB4 PE=1 SV=5	153	205745	5	4	5	4	1537	2	1	1	497.232	992.449	2	992.456	-0.0076	0	7.93	0.75	R	TTEGFGPER	E				File4189 Spectrum979 scans: 3065
43	1	ITB4_HUMAN	Integrin beta-4 OS=Homo sapiens GN=ITGB4 PE=1 SV=5	153	205745	5	4	5	4	2059	1	1	1	551.786	1101.56	2	1101.56	0.0005	0	26.28	0.0034	R	HVTQEFVSR	T				File4189 Spectrum539 scans: 2521
43	1	ITB4_HUMAN	Integrin beta-4 OS=Homo sapiens GN=ITGB4 PE=1 SV=5	153	205745	5	4	5	4	3327	1	1	1	714.409	1426.8	2	1426.8	0.0008	0	57.49	1.5e-05	K	LLELQEVDSLLR	G				File4189 Spectrum6382 scans: 9662
43	1	ITB4_HUMAN	Integrin beta-4 OS=Homo sapiens GN=ITGB4 PE=1 SV=5	153	205745	5	4	5	4	3892	1	1	1	820.902	1639.79	2	1639.78	0.0051	0	72.48	1.6e-07	K	VAPGYYTLTADQDAR	G				File4189 Spectrum2689 scans: 5257
43	1	ITB4_HUMAN	Integrin beta-4 OS=Homo sapiens GN=ITGB4 PE=1 SV=5	153	205745	5	4	5	4	7596	1	1	1	1025.84	3074.5	3	3074.49	0.0006	1	48.69	2.7e-05	R	TTEGFGPEREGIITIESQDGGPFPQLGSR	A				File4189 Spectrum5314 scans: 8445
44	1	RUXG_HUMAN	Small nuclear ribonucleoprotein G OS=Homo sapiens GN=SNRPG PE=1 SV=1	153	8547	2	2	2	2	3393	1	1	1	722.895	1443.78	2	1443.78	0.0005	1	69.18	3.3e-07	R	GNSIIMLEALERV	-				File4189 Spectrum6595 scans: 9897
44	1	RUXG_HUMAN	Small nuclear ribonucleoprotein G OS=Homo sapiens GN=SNRPG PE=1 SV=1	153	8547	2	2	2	2	8243	1	1	1	1162.22	3483.63	3	3483.63	0.0031	0	102.43	3.3e-10	R	GFDPFMNLVIDECVEMATSGQQNNIGMVVIR	G				File4189 Spectrum8334 scans: 11905
44		RUXGL_HUMAN	Small nuclear ribonucleoprotein G-like protein OS=Homo sapiens PE=3 SV=2	69	8595	2	1	2	1	3393	1	0	1	722.895	1443.78	2	1443.78	0.0005	1	69.18	3.3e-07	R	GNSIIMLEALERV	-				File4189 Spectrum6595 scans: 9897
44		RUXGL_HUMAN	Small nuclear ribonucleoprotein G-like protein OS=Homo sapiens PE=3 SV=2	69	8595	2	1	2	1	6631	1	0	1	1308.59	2615.16	2	2615.17	-0.0091	0	0.86	2.8	R	GFDPFMNLVIDECVEMATSGQQK	N				File4189 Spectrum6746 scans: 10069
45	1	PPIA_HUMAN	Peptidyl-prolyl cis-trans isomerase A OS=Homo sapiens GN=PPIA PE=1 SV=2	149	18229	5	3	4	2	3210	1	1	1	460.591	1378.75	3	1378.75	0	1	10.97	0.093	R	VSFELFADKVPK	T				File4189 Spectrum4399 scans: 7402
45	1	PPIA_HUMAN	Peptidyl-prolyl cis-trans isomerase A OS=Homo sapiens GN=PPIA PE=1 SV=2	149	18229	5	3	4	2	3784	1	1	1	799.877	1597.74	2	1597.74	0.0007	0	22.35	0.008	R	IIPGFMCQGGDFTR	H				File4189 Spectrum4329 scans: 7320
45	1	PPIA_HUMAN	Peptidyl-prolyl cis-trans isomerase A OS=Homo sapiens GN=PPIA PE=1 SV=2	149	18229	5	3	4	2	4806	1	1	1	973.504	1944.99	2	1944.99	-0.0014	0	113.36	2.4e-11	M	VNPTVFFDIAVDGEPLGR	V				File4189 Spectrum6989 scans: 10345
45	1	PPIA_HUMAN	Peptidyl-prolyl cis-trans isomerase A OS=Homo sapiens GN=PPIA PE=1 SV=2	149	18229	5	3	4	2	4807	1	1	1	649.339	1944.99	3	1944.99	0.0002	0	45.75	5.1e-05	M	VNPTVFFDIAVDGEPLGR	V				File4189 Spectrum6990 scans: 10346
45	1	PPIA_HUMAN	Peptidyl-prolyl cis-trans isomerase A OS=Homo sapiens GN=PPIA PE=1 SV=2	149	18229	5	3	4	2	7980	1	1	1	827.441	3305.74	4	3305.73	0.0019	2	0.55	0.89	M	VNPTVFFDIAVDGEPLGRVSFELFADKVPK	T				File4189 Spectrum8187 scans: 11730
45		PAL4A_HUMAN	Peptidyl-prolyl cis-trans isomerase A-like 4A/B/C OS=Homo sapiens GN=PPIAL4A PE=1 SV=1	22	18398	1	1	1	1	3784	1	0	1	799.877	1597.74	2	1597.74	0.0007	0	22.35	0.008	R	IIPGFMCQGGDFTR	H				File4189 Spectrum4329 scans: 7320
46	1	RS18_HUMAN	40S ribosomal protein S18 OS=Homo sapiens GN=RPS18 PE=1 SV=3	148	17708	7	7	4	4	2752	1	1	1	624.292	1246.57	2	1246.57	0.0022	0	21.58	0.029	R	AGELTEDEVER	V				File4189 Spectrum1079 scans: 3188
46	1	RS18_HUMAN	40S ribosomal protein S18 OS=Homo sapiens GN=RPS18 PE=1 SV=3	148	17708	7	7	4	4	3478	1	1	1	740.391	1478.77	2	1478.77	-0.0004	1	52.84	2.2e-05	R	QYKIPDWFLNR	Q				File4189 Spectrum5106 scans: 8211
46	1	RS18_HUMAN	40S ribosomal protein S18 OS=Homo sapiens GN=RPS18 PE=1 SV=3	148	17708	7	7	4	4	3479	1	1	1	493.93	1478.77	3	1478.77	0.0003	1	54.01	9.6e-06	R	QYKIPDWFLNR	Q				File4189 Spectrum5087 scans: 8190
46	1	RS18_HUMAN	40S ribosomal protein S18 OS=Homo sapiens GN=RPS18 PE=1 SV=3	148	17708	7	7	4	4	5809	1	1	1	1150.58	2299.15	2	2299.15	-0.0002	1	16.28	0.03	R	AGELTEDEVERVITIMQNPR	Q				File4189 Spectrum6217 scans: 9465
46	1	RS18_HUMAN	40S ribosomal protein S18 OS=Homo sapiens GN=RPS18 PE=1 SV=3	148	17708	7	7	4	4	5810	1	1	1	767.39	2299.15	3	2299.15	-0.0001	1	49.28	5.6e-05	R	AGELTEDEVERVITIMQNPR	Q				File4189 Spectrum6198 scans: 9444
46	1	RS18_HUMAN	40S ribosomal protein S18 OS=Homo sapiens GN=RPS18 PE=1 SV=3	148	17708	7	7	4	4	6235	1	1	1	819.423	2455.25	3	2455.25	-0.0027	2	24.6	0.0049	K	RAGELTEDEVERVITIMQNPR	Q				File4189 Spectrum5743 scans: 8925
46	1	RS18_HUMAN	40S ribosomal protein S18 OS=Homo sapiens GN=RPS18 PE=1 SV=3	148	17708	7	7	4	4	6236	1	1	1	614.82	2455.25	4	2455.25	0.0008	2	27.98	0.0024	K	RAGELTEDEVERVITIMQNPR	Q				File4189 Spectrum5742 scans: 8924
47	1	RS15_HUMAN	40S ribosomal protein S15 OS=Homo sapiens GN=RPS15 PE=1 SV=2	142	17029	3	3	1	1	6576	1	1	1	1294.62	2587.23	2	2587.23	-0.0007	0	86.23	8.2e-09	R	GVDLDQLLDMSYEQLMQLYSAR	Q				File4189 Spectrum9373 scans: 13314
47	1	RS15_HUMAN	40S ribosomal protein S15 OS=Homo sapiens GN=RPS15 PE=1 SV=2	142	17029	3	3	1	1	6577	1	1	1	863.418	2587.23	3	2587.23	0.0026	0	33.9	0.00066	R	GVDLDQLLDMSYEQLMQLYSAR	Q				File4189 Spectrum9401 scans: 13362
47	1	RS15_HUMAN	40S ribosomal protein S15 OS=Homo sapiens GN=RPS15 PE=1 SV=2	142	17029	3	3	1	1	6578	1	1	1	863.418	2587.23	3	2587.23	0.0026	0	54.37	8e-06	R	GVDLDQLLDMSYEQLMQLYSAR	Q				File4189 Spectrum9372 scans: 13312
48	1	LMNA_HUMAN	Prelamin-A/C OS=Homo sapiens GN=LMNA PE=1 SV=1	141	74380	3	3	3	3	3169	1	1	1	680.347	1358.68	2	1358.68	0	0	32.57	0.00088	R	SGAQASSTPLSPTR	I				File4189 Spectrum736 scans: 2768
48	1	LMNA_HUMAN	Prelamin-A/C OS=Homo sapiens GN=LMNA PE=1 SV=1	141	74380	3	3	3	3	3716	1	1	1	783.879	1565.74	2	1565.74	0.0003	0	85.1	1e-08	R	SVGGSGGGSFGDNLVTR	S				File4189 Spectrum2488 scans: 5009
48	1	LMNA_HUMAN	Prelamin-A/C OS=Homo sapiens GN=LMNA PE=1 SV=1	141	74380	3	3	3	3	4212	1	1	1	876.935	1751.86	2	1751.86	0.001	0	56.36	5.2e-06	R	NSNLVGAAHEELQQSR	I				File4189 Spectrum2055 scans: 4436
49	1	TOM22_HUMAN	Mitochondrial import receptor subunit TOM22 homolog OS=Homo sapiens GN=TOMM22 PE=1 SV=3	136	15512	2	2	1	1	6050	1	1	1	796.782	2387.32	3	2387.32	-0.0009	1	60.31	3.4e-06	R	QILLGPNTGLSGGMPGALPSLPGKI	-				File4189 Spectrum6544 scans: 9842
49	1	TOM22_HUMAN	Mitochondrial import receptor subunit TOM22 homolog OS=Homo sapiens GN=TOMM22 PE=1 SV=3	136	15512	2	2	1	1	6051	1	1	1	1194.67	2387.32	2	2387.32	0.0004	1	93.75	1.4e-09	R	QILLGPNTGLSGGMPGALPSLPGKI	-				File4189 Spectrum6538 scans: 9836
50	1	TFR1_HUMAN	Transferrin receptor protein 1 OS=Homo sapiens GN=TFRC PE=1 SV=2	132	85274	5	4	4	3	3443	1	1	1	734.91	1467.81	2	1467.8	0.0006	0	16.61	0.028	R	SSGLPNIPVQTISR	A				File4189 Spectrum3609 scans: 6454
50	1	TFR1_HUMAN	Transferrin receptor protein 1 OS=Homo sapiens GN=TFRC PE=1 SV=2	132	85274	5	4	4	3	4198	1	1	1	873.428	1744.84	2	1744.84	0.0001	0	84.24	1.3e-08	R	SAFSNLFGGEPLSYTR	F				File4189 Spectrum5921 scans: 9128
50	1	TFR1_HUMAN	Transferrin receptor protein 1 OS=Homo sapiens GN=TFRC PE=1 SV=2	132	85274	5	4	4	3	7134	1	1	1	712.309	2845.21	4	2845.21	-0.0016	2	32.31	0.00073	R	AAAEKLFGNMEGDCPSDWKTDSTCR	M				File4189 Spectrum3365 scans: 6153
50	1	TFR1_HUMAN	Transferrin receptor protein 1 OS=Homo sapiens GN=TFRC PE=1 SV=2	132	85274	5	4	4	3	7135	1	1	1	949.41	2845.21	3	2845.21	-0.001	2	42.81	6.5e-05	R	AAAEKLFGNMEGDCPSDWKTDSTCR	M				File4189 Spectrum3358 scans: 6142
50	1	TFR1_HUMAN	Transferrin receptor protein 1 OS=Homo sapiens GN=TFRC PE=1 SV=2	132	85274	5	4	4	3	7488	1	1	1	1011.82	3032.45	3	3032.45	-0.0011	0	18.53	0.086	R	NQLALATWTIQGAANALSGDVWDIDNEF	-				File4189 Spectrum9482 scans: 13511
51	1	ENOA_HUMAN	Alpha-enolase OS=Homo sapiens GN=ENO1 PE=1 SV=2	131	47481	6	5	4	3	970	1	1	1	450.282	898.549	2	898.549	-0.0001	0	27.69	0.0077	K	TIAPALVSK	K				File4189 Spectrum1875 scans: 4187
51	1	ENOA_HUMAN	Alpha-enolase OS=Homo sapiens GN=ENO1 PE=1 SV=2	131	47481	6	5	4	3	5327	1	1	1	1077.54	2153.06	2	2153.06	-0.0015	1	50.97	2.8e-05	R	EIFDSRGNPTVEVDLFTSK	G				File4189 Spectrum4895 scans: 7969
51	1	ENOA_HUMAN	Alpha-enolase OS=Homo sapiens GN=ENO1 PE=1 SV=2	131	47481	6	5	4	3	5328	1	1	1	718.696	2153.07	3	2153.06	0.0011	1	49.66	2.2e-05	R	EIFDSRGNPTVEVDLFTSK	G				File4189 Spectrum4909 scans: 7986
51	1	ENOA_HUMAN	Alpha-enolase OS=Homo sapiens GN=ENO1 PE=1 SV=2	131	47481	6	5	4	3	5948	1	1	1	1177.08	2352.15	2	2352.15	0.0025	0	12.64	0.065	R	SGETEDTFIADLVVGLCTGQIK	T				File4189 Spectrum7843 scans: 11339
51	1	ENOA_HUMAN	Alpha-enolase OS=Homo sapiens GN=ENO1 PE=1 SV=2	131	47481	6	5	4	3	6434	1	1	1	845.432	2533.27	3	2533.28	-0.0023	2	29.05	0.0019	R	AAVPSGASTGIYEALELRDNDKTR	Y				File4189 Spectrum3795 scans: 6691
51	1	ENOA_HUMAN	Alpha-enolase OS=Homo sapiens GN=ENO1 PE=1 SV=2	131	47481	6	5	4	3	6435	1	1	1	634.326	2533.28	4	2533.28	-0.0014	2	38.87	0.00023	R	AAVPSGASTGIYEALELRDNDKTR	Y				File4189 Spectrum3789 scans: 6683
52	1	TGM3_HUMAN	Protein-glutamine gamma-glutamyltransferase E OS=Homo sapiens GN=TGM3 PE=1 SV=4	129	76926	3	3	3	3	3961	1	1	1	831.426	1660.84	2	1660.84	0.002	0	70.18	2.6e-07	R	SQGVFQCGPASVIGVR	E				File4189 Spectrum4109 scans: 7061
52	1	TGM3_HUMAN	Protein-glutamine gamma-glutamyltransferase E OS=Homo sapiens GN=TGM3 PE=1 SV=4	129	76926	3	3	3	3	4493	1	1	1	612.306	1833.9	3	1833.9	-0.001	2	27.67	0.0056	R	DAATDVASRNDPKYVGR	V				File4189 Spectrum904 scans: 2976
52	1	TGM3_HUMAN	Protein-glutamine gamma-glutamyltransferase E OS=Homo sapiens GN=TGM3 PE=1 SV=4	129	76926	3	3	3	3	5410	1	1	1	1088.52	2175.03	2	2175.02	0.0044	0	66.18	6.2e-07	R	SDLGPSYGGWQVLDATPQER	S				File4189 Spectrum4696 scans: 7743
53	1	AP2B1_HUMAN	AP-2 complex subunit beta OS=Homo sapiens GN=AP2B1 PE=1 SV=1	128	105398	6	5	5	4	5257	1	1	1	710.697	2129.07	3	2129.07	0.0019	1	38.56	0.00029	R	APEVSQYIYQVYDSILKN	-				File4189 Spectrum7470 scans: 10894
53	1	AP2B1_HUMAN	AP-2 complex subunit beta OS=Homo sapiens GN=AP2B1 PE=1 SV=1	128	105398	6	5	5	4	5258	1	1	1	1065.55	2129.08	2	2129.07	0.0087	1	33.94	0.00066	R	APEVSQYIYQVYDSILKN	-				File4189 Spectrum7473 scans: 10897
53	1	AP2B1_HUMAN	AP-2 complex subunit beta OS=Homo sapiens GN=AP2B1 PE=1 SV=1	128	105398	6	5	5	4	6209	1	1	1	816.075	2445.2	3	2445.2	0.0021	2	36.28	0.0004	K	CRAPEVSQYIYQVYDSILKN	-				File4189 Spectrum7004 scans: 10361
53	1	AP2B1_HUMAN	AP-2 complex subunit beta OS=Homo sapiens GN=AP2B1 PE=1 SV=1	128	105398	6	5	5	4	7136	1	1	1	949.787	2846.34	3	2846.34	0.0001	1	20.6	0.012	K	SQPDMAIMAVNSFVKDCEDPNPLIR	A				File4189 Spectrum6478 scans: 9769
53	1	AP2B1_HUMAN	AP-2 complex subunit beta OS=Homo sapiens GN=AP2B1 PE=1 SV=1	128	105398	6	5	5	4	7261	1	1	1	968.848	2903.52	3	2903.52	0.0022	1	59.31	2.7e-06	R	NVEGQDMLYQSLKLTNGIWILAELR	I				File4189 Spectrum8752 scans: 12414
53	1	AP2B1_HUMAN	AP-2 complex subunit beta OS=Homo sapiens GN=AP2B1 PE=1 SV=1	128	105398	6	5	5	4	9589	1	1	1	1083.33	4329.29	4	4329.28	0.0037	2	9.69	0.19	R	NVEGQDMLYQSLKLTNGIWILAELRIQPGNPNYTLSLK	C				File4189 Spectrum8813 scans: 12491
54	1	PHB2_HUMAN	Prohibitin-2 OS=Homo sapiens GN=PHB2 PE=1 SV=2	126	33276	5	4	4	3	2612	1	1	1	608.315	1214.62	2	1214.61	0.001	0	68.71	1.4e-06	K	IVQAEGEAEAAK	M				File4189 Spectrum376 scans: 2321
54	1	PHB2_HUMAN	Prohibitin-2 OS=Homo sapiens GN=PHB2 PE=1 SV=2	126	33276	5	4	4	3	3455	1	1	1	491.263	1470.77	3	1470.77	0	1	24.22	0.0053	R	QKIVQAEGEAEAAK	M				File4189 Spectrum421 scans: 2377
54	1	PHB2_HUMAN	Prohibitin-2 OS=Homo sapiens GN=PHB2 PE=1 SV=2	126	33276	5	4	4	3	3456	1	1	1	736.391	1470.77	2	1470.77	0.0002	1	38.7	0.00026	R	QKIVQAEGEAEAAK	M				File4189 Spectrum417 scans: 2372
54	1	PHB2_HUMAN	Prohibitin-2 OS=Homo sapiens GN=PHB2 PE=1 SV=2	126	33276	5	4	4	3	5537	1	1	1	1113.08	2224.14	2	2224.14	0.001	0	4.58	0.37	R	IYLTADNLVLNLQDESFTR	G				File4189 Spectrum6606 scans: 9908
54	1	PHB2_HUMAN	Prohibitin-2 OS=Homo sapiens GN=PHB2 PE=1 SV=2	126	33276	5	4	4	3	7306	1	1	1	975.844	2924.51	3	2924.51	-0.0018	1	44.61	6.6e-05	R	IYLTADNLVLNLQDESFTRGSDSLIK	G				File4189 Spectrum6643 scans: 9949
55	1	SRPRB_HUMAN	Signal recognition particle receptor subunit beta OS=Homo sapiens GN=SRPRB PE=1 SV=3	125	29912	4	3	3	2	4730	1	1	1	959	1915.99	2	1915.99	0.0007	1	80.07	3.1e-08	R	SAAPSTLDSSSTAPAQLGKK	G				File4189 Spectrum1432 scans: 3636
55	1	SRPRB_HUMAN	Signal recognition particle receptor subunit beta OS=Homo sapiens GN=SRPRB PE=1 SV=3	125	29912	4	3	3	2	4731	1	1	1	639.669	1915.99	3	1915.99	0.0016	1	38.69	0.00024	R	SAAPSTLDSSSTAPAQLGKK	G				File4189 Spectrum1429 scans: 3631
55	1	SRPRB_HUMAN	Signal recognition particle receptor subunit beta OS=Homo sapiens GN=SRPRB PE=1 SV=3	125	29912	4	3	3	2	5231	1	1	1	529.526	2114.08	4	2114.08	-0.0005	2	9.3	0.13	K	GGRGDVGSADIQDLEKWLAK	I				File4189 Spectrum5572 scans: 8729
55	1	SRPRB_HUMAN	Signal recognition particle receptor subunit beta OS=Homo sapiens GN=SRPRB PE=1 SV=3	125	29912	4	3	3	2	6312	1	1	1	829.425	2485.25	3	2485.26	-0.0026	2	38.69	0.00024	K	GKEFEFSQLPLKVEFLECSAK	G				File4189 Spectrum5970 scans: 9185
56	1	HSPB1_HUMAN	Heat shock protein beta-1 OS=Homo sapiens GN=HSPB1 PE=1 SV=2	125	22826	3	3	2	2	3896	1	1	1	548.613	1642.82	3	1642.82	0.0005	1	48.21	3e-05	R	AQLGGPEAAKSDETAAK	-				File4189 Spectrum362 scans: 2300
56	1	HSPB1_HUMAN	Heat shock protein beta-1 OS=Homo sapiens GN=HSPB1 PE=1 SV=2	125	22826	3	3	2	2	3897	1	1	1	822.416	1642.82	2	1642.82	0.0006	1	52.17	1.3e-05	R	AQLGGPEAAKSDETAAK	-				File4189 Spectrum365 scans: 2304
56	1	HSPB1_HUMAN	Heat shock protein beta-1 OS=Homo sapiens GN=HSPB1 PE=1 SV=2	125	22826	3	3	2	2	4706	1	1	1	953.5	1904.99	2	1904.98	0.0011	0	56.14	5.4e-06	K	LATQSNEITIPVTFESR	A				File4189 Spectrum4479 scans: 7493
57	1	HNRPC_HUMAN	Heterogeneous nuclear ribonucleoproteins C1/C2 OS=Homo sapiens GN=HNRNPC PE=1 SV=4	124	33707	3	3	3	3	3036	1	1	1	658.901	1315.79	2	1315.79	0.0003	0	41.65	0.00017	R	VFIGNLNTLVVK	K				File4189 Spectrum5045 scans: 8142
57	1	HNRPC_HUMAN	Heterogeneous nuclear ribonucleoproteins C1/C2 OS=Homo sapiens GN=HNRNPC PE=1 SV=4	124	33707	3	3	3	3	4010	1	1	1	841.96	1681.91	2	1681.91	-0.0019	0	81.9	4.3e-08	R	MIAGQVLDINLAAEPK	V				File4189 Spectrum5094 scans: 8198
57	1	HNRPC_HUMAN	Heterogeneous nuclear ribonucleoproteins C1/C2 OS=Homo sapiens GN=HNRNPC PE=1 SV=4	124	33707	3	3	3	3	5069	1	1	1	684.715	2051.12	3	2051.12	0.0036	1	35.32	0.00049	R	MIAGQVLDINLAAEPKVNR	G				File4189 Spectrum4570 scans: 7595
57		HNRCL_HUMAN	Heterogeneous nuclear ribonucleoprotein C-like 1 OS=Homo sapiens GN=HNRNPCL1 PE=1 SV=1	42	32180	1	1	1	1	3036	1	0	1	658.901	1315.79	2	1315.79	0.0003	0	41.65	0.00017	R	VFIGNLNTLVVK	K				File4189 Spectrum5045 scans: 8142
58	1	MYL6_HUMAN	Myosin light polypeptide 6 OS=Homo sapiens GN=MYL6 PE=1 SV=2	121	17090	3	3	3	3	3114	1	1	1	671.318	1340.62	2	1340.62	0.0006	0	38.23	0.00026	K	ILYSQCGDVMR	A				File4189 Spectrum2252 scans: 4692
58	1	MYL6_HUMAN	Myosin light polypeptide 6 OS=Homo sapiens GN=MYL6 PE=1 SV=2	121	17090	3	3	3	3	3158	1	1	1	677.871	1353.73	2	1353.73	0.0016	0	52.94	1.8e-05	R	ALGQNPTNAEVLK	V				File4189 Spectrum1908 scans: 4238
58	1	MYL6_HUMAN	Myosin light polypeptide 6 OS=Homo sapiens GN=MYL6 PE=1 SV=2	121	17090	3	3	3	3	4671	1	1	1	630.006	1887	3	1887	0.0008	0	62.08	1.5e-06	K	VLDFEHFLPMLQTVAK	N				File4189 Spectrum7303 scans: 10702
58		MYL6B_HUMAN	Myosin light chain 6B OS=Homo sapiens GN=MYL6B PE=1 SV=1	75	22864	2	2	2	2	3114	1	0	1	671.318	1340.62	2	1340.62	0.0006	0	38.23	0.00026	K	ILYSQCGDVMR	A				File4189 Spectrum2252 scans: 4692
58		MYL6B_HUMAN	Myosin light chain 6B OS=Homo sapiens GN=MYL6B PE=1 SV=1	75	22864	2	2	2	2	3158	1	0	1	677.871	1353.73	2	1353.73	0.0016	0	52.94	1.8e-05	R	ALGQNPTNAEVLK	V				File4189 Spectrum1908 scans: 4238
59	1	FILA2_HUMAN	Filaggrin-2 OS=Homo sapiens GN=FLG2 PE=1 SV=1	118	249296	6	5	5	4	3050	1	1	1	660.789	1319.56	2	1319.56	0	0	58.44	1.8e-06	R	FSNSSSSNEFSK	C				File4189 Spectrum613 scans: 2611
59	1	FILA2_HUMAN	Filaggrin-2 OS=Homo sapiens GN=FLG2 PE=1 SV=1	118	249296	6	5	5	4	3607	1	1	1	765.829	1529.64	2	1529.64	-0.0002	0	20.12	0.016	R	ENGQPQNCGGQWR	T				File4189 Spectrum566 scans: 2554
59	1	FILA2_HUMAN	Filaggrin-2 OS=Homo sapiens GN=FLG2 PE=1 SV=1	118	249296	6	5	5	4	5944	1	1	1	784.668	2350.98	3	2350.98	0.0011	0	43.85	4.9e-05	R	QSSYGQHGSGSSQSSGYGQYGSR	E				File4189 Spectrum398 scans: 2347
59	1	FILA2_HUMAN	Filaggrin-2 OS=Homo sapiens GN=FLG2 PE=1 SV=1	118	249296	6	5	5	4	6341	1	1	1	625.767	2499.04	4	2499.04	-0.0003	0	34.48	0.00036	R	SGQSSYGQHSSGSSQSSGYGQHGSR	Q				File4189 Spectrum17 scans: 1890
59	1	FILA2_HUMAN	Filaggrin-2 OS=Homo sapiens GN=FLG2 PE=1 SV=1	118	249296	6	5	5	4	6342	1	1	1	834.021	2499.04	3	2499.04	0.0025	0	15.16	0.03	R	SGQSSYGQHSSGSSQSSGYGQHGSR	Q				File4189 Spectrum21 scans: 1897
59	1	FILA2_HUMAN	Filaggrin-2 OS=Homo sapiens GN=FLG2 PE=1 SV=1	118	249296	6	5	5	4	8094	1	1	1	1125.42	3373.25	3	3373.25	0.0027	0	3.2	0.48	R	TGSSQSSCCGQYGSGGSQSCSNGQHEYGSCGR	F				File4189 Spectrum255 scans: 2174
60	1	SFPQ_HUMAN	Splicing factor, proline- and glutamine-rich OS=Homo sapiens GN=SFPQ PE=1 SV=2	117	76216	2	2	2	2	3115	1	1	1	671.337	1340.66	2	1340.66	0.0012	0	84.27	1.3e-08	R	FGQGGAGPVGGQGPR	G				File4189 Spectrum998 scans: 3087
60	1	SFPQ_HUMAN	Splicing factor, proline- and glutamine-rich OS=Homo sapiens GN=SFPQ PE=1 SV=2	117	76216	2	2	2	2	6690	1	1	1	880.438	2638.29	3	2638.29	-0.0004	0	49.97	2.1e-05	R	NLSPYVSNELLEEAFSQFGPIER	A				File4189 Spectrum7767 scans: 11252
61	1	EF1A1_HUMAN	Elongation factor 1-alpha 1 OS=Homo sapiens GN=EEF1A1 PE=1 SV=1	117	50451	4	4	3	3	1086	1	1	1	457.787	913.56	2	913.56	0.0002	0	28.39	0.0072	R	QTVAVGVIK	A				File4189 Spectrum1845 scans: 4152
61	1	EF1A1_HUMAN	Elongation factor 1-alpha 1 OS=Homo sapiens GN=EEF1A1 PE=1 SV=1	117	50451	4	4	3	3	1709	1	1	1	513.309	1024.6	2	1024.6	-0.0003	0	45.36	7.7e-05	K	IGGIGTVPVGR	V				File4189 Spectrum2376 scans: 4850
61	1	EF1A1_HUMAN	Elongation factor 1-alpha 1 OS=Homo sapiens GN=EEF1A1 PE=1 SV=1	117	50451	4	4	3	3	7412	1	1	1	999.138	2994.39	3	2994.39	0	0	45.53	5.4e-05	K	SGDAAIVDMVPGKPMCVESFSDYPPLGR	F				File4189 Spectrum5903 scans: 9108
61	1	EF1A1_HUMAN	Elongation factor 1-alpha 1 OS=Homo sapiens GN=EEF1A1 PE=1 SV=1	117	50451	4	4	3	3	7413	1	1	1	999.138	2994.39	3	2994.39	0	0	48.08	3.1e-05	K	SGDAAIVDMVPGKPMCVESFSDYPPLGR	F				File4189 Spectrum5847 scans: 9045
61		EF1A2_HUMAN	Elongation factor 1-alpha 2 OS=Homo sapiens GN=EEF1A2 PE=1 SV=1	56	50780	2	2	2	2	1086	1	0	1	457.787	913.56	2	913.56	0.0002	0	28.39	0.0072	R	QTVAVGVIK	N				File4189 Spectrum1845 scans: 4152
61		EF1A2_HUMAN	Elongation factor 1-alpha 2 OS=Homo sapiens GN=EEF1A2 PE=1 SV=1	56	50780	2	2	2	2	1709	1	0	1	513.309	1024.6	2	1024.6	-0.0003	0	45.36	7.7e-05	K	IGGIGTVPVGR	V				File4189 Spectrum2376 scans: 4850
62	1	SHC1_HUMAN	SHC-transforming protein 1 OS=Homo sapiens GN=SHC1 PE=1 SV=4	117	63296	2	1	1	1	7316	1	1	1	976.484	2926.43	3	2926.43	-0.0002	0	116.65	1.6e-11	R	ACHILECPEGLAQDVISTIGQAFELR	F				File4189 Spectrum9484 scans: 13515
62	1	SHC1_HUMAN	SHC-transforming protein 1 OS=Homo sapiens GN=SHC1 PE=1 SV=4	117	63296	2	1	1	1	7317	1	1	1	976.487	2926.44	3	2926.43	0.0062	0	8.85	0.2	R	ACHILECPEGLAQDVISTIGQAFELR	F				File4189 Spectrum9453 scans: 13462
63	1	AFG32_HUMAN	AFG3-like protein 2 OS=Homo sapiens GN=AFG3L2 PE=1 SV=2	117	88984	2	2	2	2	6855	1	1	1	906.141	2715.4	3	2715.4	0.0009	1	75.41	2.5e-07	R	KLASLTPGFSGADVANVCNEAALIAAR	H				File4189 Spectrum5547 scans: 8702
63	1	AFG32_HUMAN	AFG3-like protein 2 OS=Homo sapiens GN=AFG3L2 PE=1 SV=2	117	88984	2	2	2	2	7347	1	1	1	985.164	2952.47	3	2952.47	0.001	0	60.22	2.3e-06	K	ATAGEANVPFITVSGSEFLEMFVGVGPAR	V				File4189 Spectrum9057 scans: 12823
64	1	DESP_HUMAN	Desmoplakin OS=Homo sapiens GN=DSP PE=1 SV=3	112	334021	8	6	8	6	1687	1	1	1	511.767	1021.52	2	1021.52	0.0009	0	45.44	0.00025	K	YGDGIQLTR	S				File4189 Spectrum1947 scans: 4294
64	1	DESP_HUMAN	Desmoplakin OS=Homo sapiens GN=DSP PE=1 SV=3	112	334021	8	6	8	6	2870	1	1	1	636.357	1270.7	2	1270.7	0.0004	0	45.77	5.1e-05	R	QLQNIIQATSR	E				File4189 Spectrum2638 scans: 5192
64	1	DESP_HUMAN	Desmoplakin OS=Homo sapiens GN=DSP PE=1 SV=3	112	334021	8	6	8	6	3619	1	1	1	768.859	1535.7	2	1535.7	-0.0001	0	16.16	0.03	K	GLPSPYNMSSAPGSR	S	Oxidation (M)	0.000000010000000.0		File4189 Spectrum1829 scans: 4131
64	1	DESP_HUMAN	Desmoplakin OS=Homo sapiens GN=DSP PE=1 SV=3	112	334021	8	6	8	6	3799	1	1	1	802.42	1602.83	2	1602.83	0.0005	0	12.38	0.069	K	SVEEVASEIQPFLR	G				File4189 Spectrum5778 scans: 8964
64	1	DESP_HUMAN	Desmoplakin OS=Homo sapiens GN=DSP PE=1 SV=3	112	334021	8	6	8	6	4523	1	1	1	921.462	1840.91	2	1840.91	0.0003	0	5.87	0.28	K	SAIYQLEEEYENLLK	A				File4189 Spectrum6907 scans: 10251
64	1	DESP_HUMAN	Desmoplakin OS=Homo sapiens GN=DSP PE=1 SV=3	112	334021	8	6	8	6	5204	1	1	1	1053.45	2104.88	2	2104.88	-0.0017	0	15.94	0.038	R	GVITDQNSDGYCQTGTMSR	H	Oxidation (M)	0.0000000000000000100.0		File4189 Spectrum1161 scans: 3291
64	1	DESP_HUMAN	Desmoplakin OS=Homo sapiens GN=DSP PE=1 SV=3	112	334021	8	6	8	6	5635	1	1	1	752.69	2255.05	3	2255.05	0.0015	2	22.38	0.008	K	SVEDRFDQQKNDYDQLQK	A				File4189 Spectrum1904 scans: 4231
64	1	DESP_HUMAN	Desmoplakin OS=Homo sapiens GN=DSP PE=1 SV=3	112	334021	8	6	8	6	5661	1	1	1	754.667	2260.98	3	2260.98	-0.0006	1	45.74	6.1e-05	R	RGVITDQNSDGYCQTGTMSR	H	Oxidation (M)	0.00000000000000000100.0		File4189 Spectrum760 scans: 2798
65	1	AP2A1_HUMAN	AP-2 complex subunit alpha-1 OS=Homo sapiens GN=AP2A1 PE=1 SV=3	112	108561	7	4	3	3	7250	1	1	1	967.181	2898.52	3	2898.51	0.0082	0	56.77	4.8e-06	K	LLGFGSALLDNVDPNPENFVGAGIIQTK	A				File4189 Spectrum7467 scans: 10891
65	1	AP2A1_HUMAN	AP-2 complex subunit alpha-1 OS=Homo sapiens GN=AP2A1 PE=1 SV=3	112	108561	7	4	3	3	8282	1	1	1	877.474	3505.87	4	3505.87	-0.0034	1	16.82	0.083	R	VAAQVDGGAQVQQVLNIECLRDFLTPPLLSVR	F				File4189 Spectrum8193 scans: 11737
65	1	AP2A1_HUMAN	AP-2 complex subunit alpha-1 OS=Homo sapiens GN=AP2A1 PE=1 SV=3	112	108561	7	4	3	3	8283	1	1	1	1169.63	3505.87	3	3505.87	-0.0019	1	65.73	1e-06	R	VAAQVDGGAQVQQVLNIECLRDFLTPPLLSVR	F				File4189 Spectrum8179 scans: 11721
65	1	AP2A1_HUMAN	AP-2 complex subunit alpha-1 OS=Homo sapiens GN=AP2A1 PE=1 SV=3	112	108561	7	4	3	3	8284	1	1	1	1169.63	3505.87	3	3505.87	0.0025	1	22.11	0.022	R	VAAQVDGGAQVQQVLNIECLRDFLTPPLLSVR	F				File4189 Spectrum8113 scans: 11643
65	1	AP2A1_HUMAN	AP-2 complex subunit alpha-1 OS=Homo sapiens GN=AP2A1 PE=1 SV=3	112	108561	7	4	3	3	8897	1	1	1	1298.34	3892	3	3892.01	-0.005	1	0.31	4.5	R	AVEYLTLSSVASTDVLATVLEEMPPFPERESSILAK	L				File4189 Spectrum9174 scans: 13016
65	1	AP2A1_HUMAN	AP-2 complex subunit alpha-1 OS=Homo sapiens GN=AP2A1 PE=1 SV=3	112	108561	7	4	3	3	8898	1	1	1	1298.34	3892	3	3892.01	-0.005	1	15.62	0.13	R	AVEYLTLSSVASTDVLATVLEEMPPFPERESSILAK	L				File4189 Spectrum9224 scans: 13085
65	1	AP2A1_HUMAN	AP-2 complex subunit alpha-1 OS=Homo sapiens GN=AP2A1 PE=1 SV=3	112	108561	7	4	3	3	8899	1	1	1	974.01	3892.01	4	3892.01	0.002	1	20.51	0.038	R	AVEYLTLSSVASTDVLATVLEEMPPFPERESSILAK	L				File4189 Spectrum9187 scans: 13035
66	1	RS30_HUMAN	40S ribosomal protein S30 OS=Homo sapiens GN=FAU PE=1 SV=1	107	6644	3	3	2	2	2086	1	1	1	554.314	1106.61	2	1106.61	0.0003	0	52.25	4e-05	R	FVNVVPTFGK	K				File4189 Spectrum4025 scans: 6965
66	1	RS30_HUMAN	40S ribosomal protein S30 OS=Homo sapiens GN=FAU PE=1 SV=1	107	6644	3	3	2	2	2695	1	1	1	412.576	1234.71	3	1234.71	-0.0006	1	33.35	0.00075	R	FVNVVPTFGKK	K				File4189 Spectrum3276 scans: 6042
66	1	RS30_HUMAN	40S ribosomal protein S30 OS=Homo sapiens GN=FAU PE=1 SV=1	107	6644	3	3	2	2	2696	1	1	1	618.361	1234.71	2	1234.71	0.0005	1	56.73	6.4e-06	R	FVNVVPTFGKK	K				File4189 Spectrum3268 scans: 6033
67	1	HNRPL_HUMAN	Heterogeneous nuclear ribonucleoprotein L OS=Homo sapiens GN=HNRNPL PE=1 SV=2	106	64720	3	3	3	3	1442	1	1	1	489.748	977.482	2	977.482	0.0001	0	23.3	0.0065	R	FSTPEQAAK	N				File4189 Spectrum595 scans: 2589
67	1	HNRPL_HUMAN	Heterogeneous nuclear ribonucleoprotein L OS=Homo sapiens GN=HNRNPL PE=1 SV=2	106	64720	3	3	3	3	2165	1	1	1	561.256	1120.5	2	1120.5	0.0005	0	21.51	0.029	K	LCFSTAQHAS	-				File4189 Spectrum1485 scans: 3701
67	1	HNRPL_HUMAN	Heterogeneous nuclear ribonucleoprotein L OS=Homo sapiens GN=HNRNPL PE=1 SV=2	106	64720	3	3	3	3	7617	1	1	1	1029.88	3086.63	3	3086.62	0.0024	0	95.48	1.1e-09	R	GLIDGVVEADLVEALQEFGPISYVVVMPK	K				File4189 Spectrum10880 scans: 16189
68	1	K1C18_HUMAN	Keratin, type I cytoskeletal 18 OS=Homo sapiens GN=KRT18 PE=1 SV=2	105	48029	4	4	4	4	3540	1	1	1	752.897	1503.78	2	1503.78	0.0019	1	47.11	3.8e-05	R	IVDGKVVSETNDTK	V				File4189 Spectrum531 scans: 2510
68	1	K1C18_HUMAN	Keratin, type I cytoskeletal 18 OS=Homo sapiens GN=KRT18 PE=1 SV=2	105	48029	4	4	4	4	5082	1	1	1	687.037	2058.09	3	2058.09	0.0034	1	24.34	0.0052	K	IIEDLRAQIFANTVDNAR	I				File4189 Spectrum4471 scans: 7484
68	1	K1C18_HUMAN	Keratin, type I cytoskeletal 18 OS=Homo sapiens GN=KRT18 PE=1 SV=2	105	48029	4	4	4	4	6765	1	1	1	890.802	2669.38	3	2669.38	0.0003	0	23.71	0.006	R	YALQMEQLNGILLHLESELAQTR	A				File4189 Spectrum8646 scans: 12280
68	1	K1C18_HUMAN	Keratin, type I cytoskeletal 18 OS=Homo sapiens GN=KRT18 PE=1 SV=2	105	48029	4	4	4	4	7151	1	1	1	952.141	2853.4	3	2853.4	-0.0005	0	54.46	7.8e-06	R	SLGSVQAPSYGARPVSSAASVYAGAGGSGSR	I				File4189 Spectrum2986 scans: 5653
69	1	RS10_HUMAN	40S ribosomal protein S10 OS=Homo sapiens GN=RPS10 PE=1 SV=1	100	18886	4	4	1	1	6059	1	1	1	798.067	2391.18	3	2391.18	-0.0021	2	37.66	0.00029	R	SAVPPGADKKAEAGAGSATEFQFR	G				File4189 Spectrum2284 scans: 4735
69	1	RS10_HUMAN	40S ribosomal protein S10 OS=Homo sapiens GN=RPS10 PE=1 SV=1	100	18886	4	4	1	1	6060	1	1	1	598.803	2391.18	4	2391.18	-0.001	2	28.72	0.0039	R	SAVPPGADKKAEAGAGSATEFQFR	G				File4189 Spectrum2337 scans: 4799
69	1	RS10_HUMAN	40S ribosomal protein S10 OS=Homo sapiens GN=RPS10 PE=1 SV=1	100	18886	4	4	1	1	6061	1	1	1	598.803	2391.18	4	2391.18	-0.0003	2	34.07	0.00064	R	SAVPPGADKKAEAGAGSATEFQFR	G				File4189 Spectrum2283 scans: 4734
69	1	RS10_HUMAN	40S ribosomal protein S10 OS=Homo sapiens GN=RPS10 PE=1 SV=1	100	18886	4	4	1	1	6062	1	1	1	798.068	2391.18	3	2391.18	0.0019	2	45.87	5e-05	R	SAVPPGADKKAEAGAGSATEFQFR	G				File4189 Spectrum2336 scans: 4798
70	1	APOL2_HUMAN	Apolipoprotein L2 OS=Homo sapiens GN=APOL2 PE=1 SV=1	96	37126	1	1	1	1	7853	1	1	1	1079.22	3234.65	3	3234.65	-0.0002	1	96.39	9.2e-10	K	VMKEFVGGNTPNVLTLVDNWYQVTQGIGR	N				File4189 Spectrum8153 scans: 11690
71	1	ACOD_HUMAN	Acyl-CoA desaturase OS=Homo sapiens GN=SCD PE=1 SV=2	93	41667	1	1	1	1	6770	1	1	1	891.784	2672.33	3	2672.33	0.0014	0	92.9	1.9e-09	M	PAHLLQDDISSSYTTTTTITAPPSR	V				File4189 Spectrum3563 scans: 6398
72	1	DNJA2_HUMAN	DnaJ homolog subfamily A member 2 OS=Homo sapiens GN=DNAJA2 PE=1 SV=1	92	46344	4	2	3	2	3096	1	1	1	669.301	1336.59	2	1336.59	0	0	59.62	3.1e-06	K	NVLCSACSGQGGK	S				File4189 Spectrum565 scans: 2553
72	1	DNJA2_HUMAN	DnaJ homolog subfamily A member 2 OS=Homo sapiens GN=DNAJA2 PE=1 SV=1	92	46344	4	2	3	2	4138	1	1	1	865.454	1728.89	2	1728.89	0.0024	0	49.64	3e-05	K	IGLVEALCGFQFTFK	H				File4189 Spectrum7472 scans: 10896
72	1	DNJA2_HUMAN	DnaJ homolog subfamily A member 2 OS=Homo sapiens GN=DNAJA2 PE=1 SV=1	92	46344	4	2	3	2	5970	3	0	1	788.719	2363.14	3	2363.12	0.0102	2	0.09	5.8	R	RGEDMMHPLKVSLEDLYNGK	T	2 Oxidation (M)	0.00001100000000000000.0		File4189 Spectrum3465 scans: 6277
72	1	DNJA2_HUMAN	DnaJ homolog subfamily A member 2 OS=Homo sapiens GN=DNAJA2 PE=1 SV=1	92	46344	4	2	3	2	5971	2	0	1	1182.58	2363.14	2	2363.12	0.0109	2	0.95	5.4	R	RGEDMMHPLKVSLEDLYNGK	T	2 Oxidation (M)	0.00001100000000000000.0		File4189 Spectrum3467 scans: 6279
73	1	RS29_HUMAN	40S ribosomal protein S29 OS=Homo sapiens GN=RPS29 PE=1 SV=2	92	6900	5	4	3	3	1063	1	1	1	457.204	912.394	2	912.395	-0.0002	0	30.64	0.0015	K	YGLNMCR	Q				File4189 Spectrum1761 scans: 4043
73	1	RS29_HUMAN	40S ribosomal protein S29 OS=Homo sapiens GN=RPS29 PE=1 SV=2	92	6900	5	4	3	3	1064	1	1	1	457.205	912.395	2	912.395	0	0	52.66	9.2e-06	K	YGLNMCR	Q				File4189 Spectrum1703 scans: 3969
73	1	RS29_HUMAN	40S ribosomal protein S29 OS=Homo sapiens GN=RPS29 PE=1 SV=2	92	6900	5	4	3	3	1116	1	1	1	460.758	919.501	2	919.501	-0.0001	1	14.91	0.068	K	DIGFIKLD	-				File4189 Spectrum4882 scans: 7955
73	1	RS29_HUMAN	40S ribosomal protein S29 OS=Homo sapiens GN=RPS29 PE=1 SV=2	92	6900	5	4	3	3	1117	1	1	1	460.758	919.502	2	919.501	0.0001	1	18.85	0.031	K	DIGFIKLD	-				File4189 Spectrum4949 scans: 8033
73	1	RS29_HUMAN	40S ribosomal protein S29 OS=Homo sapiens GN=RPS29 PE=1 SV=2	92	6900	5	4	3	3	3288	1	1	1	470.926	1409.76	3	1409.76	0.0002	2	35.62	0.00054	R	QYAKDIGFIKLD	-				File4189 Spectrum3868 scans: 6785
74	1	EF2_HUMAN	Elongation factor 2 OS=Homo sapiens GN=EEF2 PE=1 SV=4	90	96246	3	3	2	2	4371	1	1	1	900.453	1798.89	2	1798.89	0.002	0	48.46	2.9e-05	K	AYLPVNESFGFTADLR	S				File4189 Spectrum5890 scans: 9094
74	1	EF2_HUMAN	Elongation factor 2 OS=Homo sapiens GN=EEF2 PE=1 SV=4	90	96246	3	3	2	2	7396	1	1	1	997.188	2988.54	3	2988.55	-0.0015	0	28.58	0.0034	R	LMEPIYLVEIQCPEQVVGGIYGVLNR	K				File4189 Spectrum8500 scans: 12096
74	1	EF2_HUMAN	Elongation factor 2 OS=Homo sapiens GN=EEF2 PE=1 SV=4	90	96246	3	3	2	2	7397	1	1	1	997.191	2988.55	3	2988.55	0.0058	0	48.41	9.3e-05	R	LMEPIYLVEIQCPEQVVGGIYGVLNR	K				File4189 Spectrum8429 scans: 12014
75	1	ERH_HUMAN	Enhancer of rudimentary homolog OS=Homo sapiens GN=ERH PE=1 SV=1	90	12422	2	2	2	2	5070	1	1	1	1027.91	2053.8	2	2053.81	-0.0024	0	85.09	3.1e-09	R	TYADYESVNECMEGVCK	M				File4189 Spectrum2949 scans: 5600
75	1	ERH_HUMAN	Enhancer of rudimentary homolog OS=Homo sapiens GN=ERH PE=1 SV=1	90	12422	2	2	2	2	5252	1	1	1	710.016	2127.02	3	2127.03	-0.0024	2	18.19	0.02	R	ADTQTYQPYNKDWIKEK	I				File4189 Spectrum2174 scans: 4591
76	1	RM14_HUMAN	39S ribosomal protein L14, mitochondrial OS=Homo sapiens GN=MRPL14 PE=1 SV=1	89	16165	2	2	2	2	1414	1	1	1	487.787	973.559	2	973.56	-0.0004	0	17.43	0.023	K	VLAIAQNFV	-				File4189 Spectrum5487 scans: 8636
76	1	RM14_HUMAN	39S ribosomal protein L14, mitochondrial OS=Homo sapiens GN=MRPL14 PE=1 SV=1	89	16165	2	2	2	2	5084	1	1	1	1030.51	2059	2	2059	0.0018	0	87.1	6.8e-09	R	FDSNNVVLIEDNGNPVGTR	I				File4189 Spectrum3627 scans: 6477
77	1	4F2_HUMAN	4F2 cell-surface antigen heavy chain OS=Homo sapiens GN=SLC3A2 PE=1 SV=3	88	68180	2	2	2	2	2740	1	1	1	623.302	1244.59	2	1244.59	0.0012	0	26.88	0.003	K	VAEDEAEAAAAAK	F				File4189 Spectrum640 scans: 2646
77	1	4F2_HUMAN	4F2 cell-surface antigen heavy chain OS=Homo sapiens GN=SLC3A2 PE=1 SV=3	88	68180	2	2	2	2	3501	1	1	1	743.891	1485.77	2	1485.77	0.0007	1	80.05	1.2e-07	K	IKVAEDEAEAAAAAK	F				File4189 Spectrum1446 scans: 3653
78	1	HNRPU_HUMAN	Heterogeneous nuclear ribonucleoprotein U OS=Homo sapiens GN=HNRNPU PE=1 SV=6	87	91269	2	1	2	1	4049	1	1	1	849.394	1696.77	2	1696.77	0.0008	1	8.93	0.62	R	GYFEYIEENKYSR	A				File4189 Spectrum3347 scans: 6126
78	1	HNRPU_HUMAN	Heterogeneous nuclear ribonucleoprotein U OS=Homo sapiens GN=HNRNPU PE=1 SV=6	87	91269	2	1	2	1	4104	1	1	1	857.96	1713.9	2	1713.9	-0.0001	0	87.39	6.4e-09	K	SSGPTSLFAVTVAPPGAR	Q				File4189 Spectrum4820 scans: 7884
79	1	CHCH1_HUMAN	Coiled-coil-helix-coiled-coil-helix domain-containing protein 1 OS=Homo sapiens GN=CHCHD1 PE=1 SV=1	87	13694	4	2	2	1	3472	1	1	1	738.422	1474.83	2	1474.83	0.0001	1	4.1	0.41	K	LLQRFPNKPYLS	-				File4189 Spectrum2880 scans: 5510
79	1	CHCH1_HUMAN	Coiled-coil-helix-coiled-coil-helix domain-containing protein 1 OS=Homo sapiens GN=CHCHD1 PE=1 SV=1	87	13694	4	2	2	1	5009	1	1	1	676.703	2027.09	3	2027.09	-0.0016	1	11.79	0.078	R	SIQETLGESGSLLPNKLNK	L				File4189 Spectrum3779 scans: 6671
79	1	CHCH1_HUMAN	Coiled-coil-helix-coiled-coil-helix domain-containing protein 1 OS=Homo sapiens GN=CHCHD1 PE=1 SV=1	87	13694	4	2	2	1	5010	1	1	1	676.704	2027.09	3	2027.09	0.0003	1	35.3	0.0016	R	SIQETLGESGSLLPNKLNK	L				File4189 Spectrum3734 scans: 6615
79	1	CHCH1_HUMAN	Coiled-coil-helix-coiled-coil-helix domain-containing protein 1 OS=Homo sapiens GN=CHCHD1 PE=1 SV=1	87	13694	4	2	2	1	5011	1	1	1	1014.55	2027.09	2	2027.09	0.0006	1	72.07	4.5e-07	R	SIQETLGESGSLLPNKLNK	L				File4189 Spectrum3741 scans: 6624
80	1	PLXB2_HUMAN	Plexin-B2 OS=Homo sapiens GN=PLXNB2 PE=1 SV=3	87	207734	1	1	1	1	3849	1	1	1	811.896	1621.78	2	1621.78	0.0011	0	86.52	7.7e-09	K	AMTLQEAEAFVGAER	C				File4189 Spectrum5057 scans: 8155
81	1	ATP5H_HUMAN	ATP synthase subunit d, mitochondrial OS=Homo sapiens GN=ATP5H PE=1 SV=3	82	18537	3	3	3	3	4625	1	1	1	936.996	1871.98	2	1871.98	-0.0007	0	35.94	0.00043	K	TIDWVAFAEIIPQNQK	A				File4189 Spectrum6936 scans: 10287
81	1	ATP5H_HUMAN	ATP synthase subunit d, mitochondrial OS=Homo sapiens GN=ATP5H PE=1 SV=3	82	18537	3	3	3	3	4772	1	1	1	966.498	1930.98	2	1930.98	-0.0022	0	64.92	4e-06	R	LAALPENPPAIDWAYYK	A				File4189 Spectrum5642 scans: 8810
81	1	ATP5H_HUMAN	ATP synthase subunit d, mitochondrial OS=Homo sapiens GN=ATP5H PE=1 SV=3	82	18537	3	3	3	3	6127	1	1	1	805.762	2414.26	3	2414.26	0	1	14.86	0.04	R	LAALPENPPAIDWAYYKANVAK	A				File4189 Spectrum5113 scans: 8219
82	1	ECI2_HUMAN	Enoyl-CoA delta isomerase 2, mitochondrial OS=Homo sapiens GN=ECI2 PE=1 SV=4	82	43957	1	1	1	1	4715	1	1	1	955.957	1909.9	2	1909.9	0.0008	0	81.51	2.3e-08	R	WLSDECTNAVVNFLSR	K				File4189 Spectrum6389 scans: 9670
83	1	TIM16_HUMAN	Mitochondrial import inner membrane translocase subunit TIM16 OS=Homo sapiens GN=PAM16 PE=1 SV=2	81	13816	2	2	2	2	2305	1	1	1	383.544	1147.61	3	1147.61	0.0004	1	34.35	0.0015	R	ALRQEFAASR	A				File4189 Spectrum719 scans: 2748
83	1	TIM16_HUMAN	Mitochondrial import inner membrane translocase subunit TIM16 OS=Homo sapiens GN=PAM16 PE=1 SV=2	81	13816	2	2	2	2	3905	1	1	1	823.477	1644.94	2	1644.94	0.0006	0	65.11	1.2e-06	K	YLAQIIVMGVQVVGR	A				File4189 Spectrum7043 scans: 10405
84	1	TACD2_HUMAN	Tumor-associated calcium signal transducer 2 OS=Homo sapiens GN=TACSTD2 PE=1 SV=3	79	36371	2	2	2	2	2687	1	1	1	617.27	1232.53	2	1232.53	-0.0018	0	15.14	0.041	K	MTVCSPDGPGGR	C				File4189 Spectrum849 scans: 2911
84	1	TACD2_HUMAN	Tumor-associated calcium signal transducer 2 OS=Homo sapiens GN=TACSTD2 PE=1 SV=3	79	36371	2	2	2	2	3781	1	1	1	799.382	1596.75	2	1596.75	0.0005	0	80.24	3e-08	R	ALGSGMAVDCSTLTSK	C				File4189 Spectrum2655 scans: 5212
85	1	EMD_HUMAN	Emerin OS=Homo sapiens GN=EMD PE=1 SV=1	79	29033	3	2	3	2	2768	1	1	1	625.786	1249.56	2	1249.56	0.0008	0	39.99	0.00049	R	TYGEPESAGPSR	A				File4189 Spectrum372 scans: 2315
85	1	EMD_HUMAN	Emerin OS=Homo sapiens GN=EMD PE=1 SV=1	79	29033	3	2	3	2	4742	1	1	1	961.889	1921.76	2	1921.76	-0.0005	0	55.1	3.1e-06	K	GYNDDYYEESYFTTR	T				File4189 Spectrum3598 scans: 6440
85	1	EMD_HUMAN	Emerin OS=Homo sapiens GN=EMD PE=1 SV=1	79	29033	3	2	3	2	7932	1	1	1	1094.5	3280.47	3	3280.48	-0.0129	1	0.09	3.2	R	SSLDLSYYPTSSSTSFMSSSSSSSSWLTRR	A				File4189 Spectrum5295 scans: 8424
86	1	CTNA1_HUMAN	Catenin alpha-1 OS=Homo sapiens GN=CTNNA1 PE=1 SV=1	78	100693	2	1	2	1	4433	1	1	1	909.946	1817.88	2	1817.88	0.0014	0	78.34	4.5e-08	R	TSVQTEDDQLIAGQSAR	A				File4189 Spectrum1965 scans: 4318
86	1	CTNA1_HUMAN	Catenin alpha-1 OS=Homo sapiens GN=CTNNA1 PE=1 SV=1	78	100693	2	1	2	1	7062	1	1	1	938.51	2812.51	3	2812.5	0.0063	1	14.35	0.17	K	VKAEVQNLGGELVVSGVDSAMSLIQAAK	N				File4189 Spectrum8231 scans: 11780
87	1	SCAM3_HUMAN	Secretory carrier-associated membrane protein 3 OS=Homo sapiens GN=SCAMP3 PE=1 SV=3	78	38661	1	1	1	1	3902	1	1	1	822.908	1643.8	2	1643.8	-0.0008	1	78.12	4.7e-08	R	TAAANAAAGAAENAFRAP	-				File4189 Spectrum3249 scans: 6009
88	1	ROA3_HUMAN	Heterogeneous nuclear ribonucleoprotein A3 OS=Homo sapiens GN=HNRNPA3 PE=1 SV=2	78	39799	1	1	1	1	4713	1	1	1	955.899	1909.78	2	1909.78	0.0002	0	77.72	2.2e-08	R	SSGSPYGGGYGSGGGSGGYGSR	R				File4189 Spectrum1089 scans: 3201
89	1	NDUS6_HUMAN	NADH dehydrogenase [ubiquinone] iron-sulfur protein 6, mitochondrial OS=Homo sapiens GN=NDUFS6 PE=1 SV=1	76	14045	1	1	1	1	6929	1	1	1	920.135	2757.38	3	2757.38	0.0006	1	76.25	1e-07	R	QKEVNENFAIDLIAEQPVSEVETR	V				File4189 Spectrum5509 scans: 8660
90	1	EF1B_HUMAN	Elongation factor 1-beta OS=Homo sapiens GN=EEF1B2 PE=1 SV=3	75	24919	2	2	1	1	7139	1	1	1	713.098	2848.36	4	2848.36	0.0007	1	19.34	0.015	K	SSILLDVKPWDDETDMAKLEECVR	S				File4189 Spectrum5874 scans: 9076
90	1	EF1B_HUMAN	Elongation factor 1-beta OS=Homo sapiens GN=EEF1B2 PE=1 SV=3	75	24919	2	2	1	1	7140	1	1	1	950.462	2848.36	3	2848.36	0.0007	1	70.96	2.2e-07	K	SSILLDVKPWDDETDMAKLEECVR	S				File4189 Spectrum5862 scans: 9063
91	1	HS90B_HUMAN	Heat shock protein HSP 90-beta OS=Homo sapiens GN=HSP90AB1 PE=1 SV=4	75	83554	3	2	3	2	191	1	1	1	365.727	729.439	2	729.438	0.0007	0	29.54	0.012	R	LSELLR	Y				File4189 Spectrum1900 scans: 4220
91	1	HS90B_HUMAN	Heat shock protein HSP 90-beta OS=Homo sapiens GN=HSP90AB1 PE=1 SV=4	75	83554	3	2	3	2	6186	1	1	1	1216.55	2431.09	2	2431.1	-0.003	0	66.09	1e-06	R	LVSSPCCIVTSTYGWTANMER	I				File4189 Spectrum5535 scans: 8688
91	1	HS90B_HUMAN	Heat shock protein HSP 90-beta OS=Homo sapiens GN=HSP90AB1 PE=1 SV=4	75	83554	3	2	3	2	6533	1	1	1	858.478	2572.41	3	2572.41	-0.0027	1	9.45	0.48	R	TLTLVDTGIGMTKADLINNLGTIAK	S				File4189 Spectrum6541 scans: 9839
91		GBF1_HUMAN	Golgi-specific brefeldin A-resistance guanine nucleotide exchange factor 1 OS=Homo sapiens GN=GBF1 PE=1 SV=2	30	208367	1	1	1	1	191	1	0	1	365.727	729.439	2	729.438	0.0007	0	29.54	0.012	R	LSELLR	K				File4189 Spectrum1900 scans: 4220
92	1	RPN2_HUMAN	Dolichyl-diphosphooligosaccharide--protein glycosyltransferase subunit 2 OS=Homo sapiens GN=RPN2 PE=1 SV=3	74	69355	2	1	2	1	7887	1	1	1	1085.23	3252.67	3	3252.67	-0.0007	0	74.27	1.1e-07	K	ASLDRPFTNLESAFYSIVGLSSLGAQVPDAK	K				File4189 Spectrum8631 scans: 12263
92	1	RPN2_HUMAN	Dolichyl-diphosphooligosaccharide--protein glycosyltransferase subunit 2 OS=Homo sapiens GN=RPN2 PE=1 SV=3	74	69355	2	1	2	1	8265	1	1	1	874.468	3493.84	4	3493.85	-0.0027	1	2.33	2.5	R	LKASLDRPFTNLESAFYSIVGLSSLGAQVPDAK	K				File4189 Spectrum8125 scans: 11656
93	1	EWS_HUMAN	RNA-binding protein EWS OS=Homo sapiens GN=EWSR1 PE=1 SV=1	74	68721	1	1	1	1	5563	1	1	1	1117.96	2233.92	2	2233.92	-0.0019	0	74.23	4.5e-08	R	AGDWQCPNPGCGNQNFAWR	T				File4189 Spectrum3601 scans: 6444
94	1	H2A1B_HUMAN	Histone H2A type 1-B/E OS=Homo sapiens GN=HIST1H2AB PE=1 SV=2	74	14127	1	1	1	1	4764	1	1	1	966.088	1930.16	2	1930.16	-0.0007	0	74.1	4.1e-08	R	VTIAQGGVLPNIQAVLLPK	K				File4189 Spectrum6769 scans: 10096
95	1	SPR2E_HUMAN	Small proline-rich protein 2E OS=Homo sapiens GN=SPRR2E PE=2 SV=2	72	8591	3	3	2	2	3434	1	1	1	732.852	1463.69	2	1463.69	-0.0007	0	26.62	0.0032	K	CPPVTPSPPCQPK	C				File4189 Spectrum1136 scans: 3261
95	1	SPR2E_HUMAN	Small proline-rich protein 2E OS=Homo sapiens GN=SPRR2E PE=2 SV=2	72	8591	3	3	2	2	3435	1	1	1	732.852	1463.69	2	1463.69	0.0002	0	52.28	1.3e-05	K	CPPVTPSPPCQPK	C				File4189 Spectrum1197 scans: 3336
95	1	SPR2E_HUMAN	Small proline-rich protein 2E OS=Homo sapiens GN=SPRR2E PE=2 SV=2	72	8591	3	3	2	2	3542	1	1	1	753.366	1504.72	2	1504.72	0.0002	0	22.77	0.0073	K	QPCQPPPVCPTPK	C				File4189 Spectrum958 scans: 3039
95		SPR2F_HUMAN	Small proline-rich protein 2F OS=Homo sapiens GN=SPRR2F PE=2 SV=1	64	8541	3	2	2	1	3434	1	0	1	732.852	1463.69	2	1463.69	-0.0007	0	26.62	0.0032	K	CPPVTPSPPCQPK	C				File4189 Spectrum1136 scans: 3261
95		SPR2F_HUMAN	Small proline-rich protein 2F OS=Homo sapiens GN=SPRR2F PE=2 SV=1	64	8541	3	2	2	1	3435	1	0	1	732.852	1463.69	2	1463.69	0.0002	0	52.28	1.3e-05	K	CPPVTPSPPCQPK	C				File4189 Spectrum1197 scans: 3336
95		SPR2F_HUMAN	Small proline-rich protein 2F OS=Homo sapiens GN=SPRR2F PE=2 SV=1	64	8541	3	2	2	1	5264	2	0	1	711.979	2132.92	3	2132.92	0.0013	1	7.89	0.24	K	CPEPCPPPKCPEPCPPSK	C				File4189 Spectrum885 scans: 2953
95		SPR2A_HUMAN	Small proline-rich protein 2A OS=Homo sapiens GN=SPRR2A PE=2 SV=1	23	8587	1	1	1	1	3542	1	0	1	753.366	1504.72	2	1504.72	0.0002	0	22.77	0.0073	K	QPCQPPPVCPTPK	C				File4189 Spectrum958 scans: 3039
96	1	CDC42_HUMAN	Cell division control protein 42 homolog OS=Homo sapiens GN=CDC42 PE=1 SV=2	72	21587	2	2	2	2	2544	1	1	1	599.792	1197.57	2	1197.57	0.0001	0	57.29	6.7e-06	K	YVECSALTQK	G				File4189 Spectrum1107 scans: 3224
96	1	CDC42_HUMAN	Cell division control protein 42 homolog OS=Homo sapiens GN=CDC42 PE=1 SV=2	72	21587	2	2	2	2	5313	1	1	1	717.728	2150.16	3	2150.16	-0.0006	1	30.22	0.0015	K	GLKNVFDEAILAALEPPEPK	K				File4189 Spectrum7203 scans: 10587
97	1	POF1B_HUMAN	Protein POF1B OS=Homo sapiens GN=POF1B PE=1 SV=3	71	68878	2	2	2	2	2798	1	1	1	629.312	1256.61	2	1256.61	-0.0011	0	37.36	0.00031	R	NLEQENQNLR	M				File4189 Spectrum679 scans: 2698
97	1	POF1B_HUMAN	Protein POF1B OS=Homo sapiens GN=POF1B PE=1 SV=3	71	68878	2	2	2	2	4811	1	1	1	974.002	1945.99	2	1945.99	0	0	49.07	2.5e-05	K	YVVQNPEQEPLSQFLR	G				File4189 Spectrum5383 scans: 8521
98	1	SRP14_HUMAN	Signal recognition particle 14 kDa protein OS=Homo sapiens GN=SRP14 PE=1 SV=2	70	14675	3	1	3	1	274	3	1	1	374.222	746.429	2	746.429	0.0007	2	2.41	5	R	ATDGKKK	I				File4189 Spectrum828 scans: 2886
98	1	SRP14_HUMAN	Signal recognition particle 14 kDa protein OS=Homo sapiens GN=SRP14 PE=1 SV=2	70	14675	3	1	3	1	3999	1	1	1	839.457	1676.9	2	1676.9	0.0002	0	70.35	3.1e-07	M	VLLESEQFLTELTR	L				File4189 Spectrum6384 scans: 9664
98	1	SRP14_HUMAN	Signal recognition particle 14 kDa protein OS=Homo sapiens GN=SRP14 PE=1 SV=2	70	14675	3	1	3	1	5452	1	1	1	732.076	2193.21	3	2193.2	0.0016	1	12.86	0.26	M	VLLESEQFLTELTRLFQK	C				File4189 Spectrum8581 scans: 12196
99	1	NU188_HUMAN	Nucleoporin NUP188 homolog OS=Homo sapiens GN=NUP188 PE=1 SV=1	69	198369	4	3	2	1	2052	1	1	1	550.832	1099.65	2	1099.64	0.0104	0	8.17	0.99	R	ELWTILLGR	S				File4189 Spectrum4151 scans: 7111
99	1	NU188_HUMAN	Nucleoporin NUP188 homolog OS=Homo sapiens GN=NUP188 PE=1 SV=1	69	198369	4	3	2	1	4968	1	1	1	1006.54	2011.07	2	2011.07	-0.0001	0	19.23	0.016	K	ASPESQEPLIQLVQAFVR	H				File4189 Spectrum8652 scans: 12287
99	1	NU188_HUMAN	Nucleoporin NUP188 homolog OS=Homo sapiens GN=NUP188 PE=1 SV=1	69	198369	4	3	2	1	4969	1	1	1	671.365	2011.07	3	2011.07	0.001	0	22.06	0.0085	K	ASPESQEPLIQLVQAFVR	H				File4189 Spectrum8678 scans: 12324
99	1	NU188_HUMAN	Nucleoporin NUP188 homolog OS=Homo sapiens GN=NUP188 PE=1 SV=1	69	198369	4	3	2	1	4970	1	1	1	1006.55	2011.08	2	2011.07	0.0022	0	56.93	4.6e-06	K	ASPESQEPLIQLVQAFVR	H				File4189 Spectrum8697 scans: 12349
100	1	RPN1_HUMAN	Dolichyl-diphosphooligosaccharide--protein glycosyltransferase subunit 1 OS=Homo sapiens GN=RPN1 PE=1 SV=1	69	68641	4	3	4	3	1838	1	1	1	530.275	1058.54	2	1058.54	0	0	6.71	0.23	R	QPDSGISSIR	S				File4189 Spectrum1158 scans: 3286
100	1	RPN1_HUMAN	Dolichyl-diphosphooligosaccharide--protein glycosyltransferase subunit 1 OS=Homo sapiens GN=RPN1 PE=1 SV=1	69	68641	4	3	4	3	2660	1	1	1	615.346	1228.68	2	1228.68	-0.0003	1	47.97	6.4e-05	K	SAVEAERLVAGK	L				File4189 Spectrum1584 scans: 3823
100	1	RPN1_HUMAN	Dolichyl-diphosphooligosaccharide--protein glycosyltransferase subunit 1 OS=Homo sapiens GN=RPN1 PE=1 SV=1	69	68641	4	3	4	3	2992	1	1	1	651.375	1300.74	2	1300.73	0.0003	0	34.05	0.00064	K	ALTSEIALLQSR	L				File4189 Spectrum4245 scans: 7220
100	1	RPN1_HUMAN	Dolichyl-diphosphooligosaccharide--protein glycosyltransferase subunit 1 OS=Homo sapiens GN=RPN1 PE=1 SV=1	69	68641	4	3	4	3	3959	1	1	1	830.452	1658.89	2	1658.89	0.0016	0	23.27	0.037	R	ATSFLLALEPELEAR	L				File4189 Spectrum6677 scans: 9993
101	1	DNJA3_HUMAN	DnaJ homolog subfamily A member 3, mitochondrial OS=Homo sapiens GN=DNAJA3 PE=1 SV=2	68	53083	4	3	3	2	3971	1	1	1	834.443	1666.87	2	1666.87	0.0008	0	34.98	0.0022	R	VMIPVPAGVEDGQTVR	M				File4189 Spectrum3816 scans: 6721
101	1	DNJA3_HUMAN	DnaJ homolog subfamily A member 3, mitochondrial OS=Homo sapiens GN=DNAJA3 PE=1 SV=2	68	53083	4	3	3	2	5909	1	1	1	781.076	2340.21	3	2340.21	0.0001	0	34.79	0.00055	R	DGADIHSDLFISIAQALLGGTAR	A				File4189 Spectrum9048 scans: 12809
101	1	DNJA3_HUMAN	DnaJ homolog subfamily A member 3, mitochondrial OS=Homo sapiens GN=DNAJA3 PE=1 SV=2	68	53083	4	3	3	2	5910	1	1	1	781.077	2340.21	3	2340.21	0.0006	0	32.1	0.00098	R	DGADIHSDLFISIAQALLGGTAR	A				File4189 Spectrum9087 scans: 12868
101	1	DNJA3_HUMAN	DnaJ homolog subfamily A member 3, mitochondrial OS=Homo sapiens GN=DNAJA3 PE=1 SV=2	68	53083	4	3	3	2	6465	1	1	1	848.454	2542.34	3	2542.34	0.0006	1	0.98	0.81	R	AQGLYETINVTIPPGTQTDQKIR	M				File4189 Spectrum3917 scans: 6842
102	1	ODPB_HUMAN	Pyruvate dehydrogenase E1 component subunit beta, mitochondrial OS=Homo sapiens GN=PDHB PE=1 SV=3	68	39550	1	1	1	1	4205	1	1	1	874.445	1746.88	2	1746.88	-0.0004	0	67.78	4.4e-07	R	IMEGPAFNFLDAPAVR	V				File4189 Spectrum6209 scans: 9456
103	1	BRK1_HUMAN	Protein BRICK1 OS=Homo sapiens GN=BRK1 PE=1 SV=1	65	8796	1	1	1	1	3737	1	1	1	788.35	1574.69	2	1574.69	0	0	65.46	6.1e-07	K	IADFLNSFDMSCR	S				File4189 Spectrum5678 scans: 8851
104	1	HNRH1_HUMAN	Heterogeneous nuclear ribonucleoprotein H OS=Homo sapiens GN=HNRNPH1 PE=1 SV=4	65	49484	1	1	1	1	4522	1	1	1	921.449	1840.88	2	1840.88	0.0001	0	64.8	8.4e-07	R	STGEAFVQFASQEIAEK	A				File4189 Spectrum5245 scans: 8366
105	1	S10A9_HUMAN	Protein S100-A9 OS=Homo sapiens GN=S100A9 PE=1 SV=1	64	13291	2	1	2	1	4386	1	1	1	903.973	1805.93	2	1805.93	-0.0002	0	64.22	1e-06	R	NIETIINTFHQYSVK	L				File4189 Spectrum5789 scans: 8978
105	1	S10A9_HUMAN	Protein S100-A9 OS=Homo sapiens GN=S100A9 PE=1 SV=1	64	13291	2	1	2	1	8046	1	1	1	835.409	3337.61	4	3337.6	0.0044	1	12.3	0.07	K	VIEHIMEDLDTNADKQLSFEEFIMLMAR	L				File4189 Spectrum7736 scans: 11216
106	1	QCR6_HUMAN	Cytochrome b-c1 complex subunit 6, mitochondrial OS=Homo sapiens GN=UQCRH PE=1 SV=2	64	11017	2	1	2	1	3915	1	1	1	550.274	1647.8	3	1647.8	-0.0001	2	13.49	0.11	R	ERLELCDERVSSR	S				File4189 Spectrum1289 scans: 3453
106	1	QCR6_HUMAN	Cytochrome b-c1 complex subunit 6, mitochondrial OS=Homo sapiens GN=UQCRH PE=1 SV=2	64	11017	2	1	2	1	5568	1	1	1	745.992	2234.95	3	2234.95	0.0009	0	64.19	6.9e-07	R	SHTEEDCTEELFDFLHAR	D				File4189 Spectrum5569 scans: 8726
107	1	PHF5A_HUMAN	PHD finger-like domain-containing protein 5A OS=Homo sapiens GN=PHF5A PE=1 SV=1	64	13138	1	1	1	1	3845	1	1	1	811.322	1620.63	2	1620.63	-0.0008	0	63.5	4.5e-07	R	ICDECNYGSYQGR	C				File4189 Spectrum1062 scans: 3162
108	1	C1QBP_HUMAN	Complement component 1 Q subcomponent-binding protein, mitochondrial OS=Homo sapiens GN=C1QBP PE=1 SV=1	62	31742	1	1	1	1	7707	1	1	1	1046.14	3135.39	3	3135.4	-0.0055	0	61.98	1.9e-06	K	ALVLDCHYPEDEVGQEDEAESDIFSIR	E				File4189 Spectrum5590 scans: 8751
109	1	RAP1A_HUMAN	Ras-related protein Rap-1A OS=Homo sapiens GN=RAP1A PE=1 SV=1	62	21316	2	2	2	2	3518	1	1	1	747.901	1493.79	2	1493.79	-0.0004	0	51.89	1.4e-05	K	INVNEIFYDLVR	Q				File4189 Spectrum7351 scans: 10757
109	1	RAP1A_HUMAN	Ras-related protein Rap-1A OS=Homo sapiens GN=RAP1A PE=1 SV=1	62	21316	2	2	2	2	3791	1	1	1	800.848	1599.68	2	1599.68	0	0	25.35	0.0054	R	QWCNCAFLESSAK	S				File4189 Spectrum3340 scans: 6118
109		RAP1B_HUMAN	Ras-related protein Rap-1b OS=Homo sapiens GN=RAP1B PE=1 SV=1	52	21040	1	1	1	1	3518	1	0	1	747.901	1493.79	2	1493.79	-0.0004	0	51.89	1.4e-05	K	INVNEIFYDLVR	Q				File4189 Spectrum7351 scans: 10757
110	1	RAB5C_HUMAN	Ras-related protein Rab-5C OS=Homo sapiens GN=RAB5C PE=1 SV=2	61	23696	1	1	1	1	3673	1	1	1	776.897	1551.78	2	1551.78	0	0	61.08	1.9e-06	K	TAMNVNEIFMAIAK	K				File4189 Spectrum6740 scans: 10062
111	1	EPIPL_HUMAN	Epiplakin OS=Homo sapiens GN=EPPK1 PE=1 SV=2	60	557674	1	1	1	1	4657	1	1	1	942.999	1883.98	2	1883.98	-0.0016	0	59.97	2.4e-06	R	LSVEEAVAAGVVGGEIQEK	L				File4189 Spectrum4876 scans: 7948
112	1	TCPE_HUMAN	T-complex protein 1 subunit epsilon OS=Homo sapiens GN=CCT5 PE=1 SV=1	60	60089	1	1	1	1	4166	1	1	1	869.978	1737.94	2	1737.94	-0.0002	0	59.56	2.6e-06	R	WVGGPEIELIAIATGGR	I				File4189 Spectrum7356 scans: 10762
113	1	LPPRC_HUMAN	Leucine-rich PPR motif-containing protein, mitochondrial OS=Homo sapiens GN=LRPPRC PE=1 SV=3	59	159003	6	3	3	1	3681	5	0	1	778.957	1555.9	2	1555.91	-0.013	2	1.86	3.1	-	MAALLRSARWLLR	A				File4189 Spectrum7139 scans: 10512
113	1	LPPRC_HUMAN	Leucine-rich PPR motif-containing protein, mitochondrial OS=Homo sapiens GN=LRPPRC PE=1 SV=3	59	159003	6	3	3	1	4497	1	1	1	918.924	1835.83	2	1835.83	0.0016	0	12.17	0.072	K	LLMSEDYFTQAMEVK	A	2 Oxidation (M)	0.001000000001000.0		File4189 Spectrum3378 scans: 6171
113	1	LPPRC_HUMAN	Leucine-rich PPR motif-containing protein, mitochondrial OS=Homo sapiens GN=LRPPRC PE=1 SV=3	59	159003	6	3	3	1	4499	1	1	1	918.925	1835.84	2	1835.83	0.0031	0	0.27	0.94	K	LLMSEDYFTQAMEVK	A	2 Oxidation (M)	0.001000000001000.0		File4189 Spectrum3427 scans: 6231
113	1	LPPRC_HUMAN	Leucine-rich PPR motif-containing protein, mitochondrial OS=Homo sapiens GN=LRPPRC PE=1 SV=3	59	159003	6	3	3	1	4750	1	1	1	964.555	1927.1	2	1927.1	-0.0008	0	25.99	0.0078	R	CGAIAEQTPILLLFLLR	N				File4189 Spectrum9429 scans: 13416
113	1	LPPRC_HUMAN	Leucine-rich PPR motif-containing protein, mitochondrial OS=Homo sapiens GN=LRPPRC PE=1 SV=3	59	159003	6	3	3	1	4751	1	1	1	643.373	1927.1	3	1927.1	-0.0001	0	25.63	0.0088	R	CGAIAEQTPILLLFLLR	N				File4189 Spectrum9410 scans: 13383
113	1	LPPRC_HUMAN	Leucine-rich PPR motif-containing protein, mitochondrial OS=Homo sapiens GN=LRPPRC PE=1 SV=3	59	159003	6	3	3	1	4752	1	1	1	964.557	1927.1	2	1927.1	0.0031	0	41.86	0.00018	R	CGAIAEQTPILLLFLLR	N				File4189 Spectrum9402 scans: 13366
114	1	TADBP_HUMAN	TAR DNA-binding protein 43 OS=Homo sapiens GN=TARDBP PE=1 SV=1	59	45053	2	1	2	1	2912	1	1	1	641.303	1280.59	2	1280.59	-0.0009	1	8.28	0.46	R	KMDETDASSAVK	V				File4189 Spectrum214 scans: 2117
114	1	TADBP_HUMAN	TAR DNA-binding protein 43 OS=Homo sapiens GN=TARDBP PE=1 SV=1	59	45053	2	1	2	1	4127	1	1	1	863.887	1725.76	2	1725.76	-0.0005	0	58.76	4.6e-06	R	FGGNPGGFGNQGGFGNSR	G				File4189 Spectrum2614 scans: 5162
115	1	FBX2_HUMAN	F-box only protein 2 OS=Homo sapiens GN=FBXO2 PE=1 SV=2	58	33706	1	1	1	1	3750	1	1	1	791.442	1580.87	2	1580.87	-0.001	0	57.84	8.1e-06	R	VLAALPAAELVQACR	L				File4189 Spectrum4735 scans: 7787
116	1	EF1G_HUMAN	Elongation factor 1-gamma OS=Homo sapiens GN=EEF1G PE=1 SV=3	56	50429	2	1	2	1	5954	1	1	1	1179.02	2356.02	2	2356.02	0	0	12.85	0.12	K	AAAPAPEEEMDECEQALAAEPK	A				File4189 Spectrum3541 scans: 6371
116	1	EF1G_HUMAN	Elongation factor 1-gamma OS=Homo sapiens GN=EEF1G PE=1 SV=3	56	50429	2	1	2	1	6307	1	1	1	829.046	2484.12	3	2484.11	0.0022	1	55.95	1e-05	K	KAAAPAPEEEMDECEQALAAEPK	A				File4189 Spectrum3105 scans: 5820
117	1	1433S_HUMAN	14-3-3 protein sigma OS=Homo sapiens GN=SFN PE=1 SV=1	56	27871	2	2	2	2	4701	1	1	1	634.963	1901.87	3	1901.87	0.0008	1	20.58	0.044	K	LAEQAERYEDMAAFMK	G				File4189 Spectrum3872 scans: 6789
117	1	1433S_HUMAN	14-3-3 protein sigma OS=Homo sapiens GN=SFN PE=1 SV=1	56	27871	2	2	2	2	6181	1	1	1	811.071	2430.19	3	2430.19	0.003	2	53.02	1.1e-05	R	VLSSIEQKSNEEGSEEKGPEVR	E				File4189 Spectrum1120 scans: 3242
118	1	SLIRP_HUMAN	SRA stem-loop-interacting RNA-binding protein, mitochondrial OS=Homo sapiens GN=SLIRP PE=1 SV=1	56	12398	3	1	3	1	2214	1	1	1	565.819	1129.62	2	1129.62	-0.0004	0	6.82	0.54	R	SINQPVAFVR	R				File4189 Spectrum2800 scans: 5406
118	1	SLIRP_HUMAN	SRA stem-loop-interacting RNA-binding protein, mitochondrial OS=Homo sapiens GN=SLIRP PE=1 SV=1	56	12398	3	1	3	1	3314	1	1	1	711.841	1421.67	2	1421.67	0.0003	2	7.3	0.21	K	LPQTSDDEKKDF	-				File4189 Spectrum926 scans: 3001
118	1	SLIRP_HUMAN	SRA stem-loop-interacting RNA-binding protein, mitochondrial OS=Homo sapiens GN=SLIRP PE=1 SV=1	56	12398	3	1	3	1	3712	1	1	1	782.892	1563.77	2	1563.77	0.0012	0	55.58	6.1e-06	R	GLGWVQFSSEEGLR	N				File4189 Spectrum5089 scans: 8192
119	1	ECHA_HUMAN	Trifunctional enzyme subunit alpha, mitochondrial OS=Homo sapiens GN=HADHA PE=1 SV=2	55	83688	2	1	2	1	3697	1	1	1	781.399	1560.78	2	1560.78	0.0005	0	55.4	8.8e-06	K	MVGVPAALDMMLTGR	S				File4189 Spectrum7153 scans: 10528
119	1	ECHA_HUMAN	Trifunctional enzyme subunit alpha, mitochondrial OS=Homo sapiens GN=HADHA PE=1 SV=2	55	83688	2	1	2	1	4725	1	1	1	958.509	1915	2	1915.01	-0.0053	1	0.49	0.9	R	LPKMVGVPAALDMMLTGR	S	Oxidation (M)	0.000100000000000000.0		File4189 Spectrum1597 scans: 3840
120	1	TKT_HUMAN	Transketolase OS=Homo sapiens GN=TKT PE=1 SV=3	55	68519	1	1	1	1	5003	1	1	1	675.011	2022.01	3	2022.01	0.0013	0	55.39	9.6e-06	K	NMAEQIIQEIYSQIQSK	K				File4189 Spectrum8498 scans: 12093
121	1	GLYM_HUMAN	Serine hydroxymethyltransferase, mitochondrial OS=Homo sapiens GN=SHMT2 PE=1 SV=3	55	56414	2	2	2	2	5397	1	1	1	724.024	2169.05	3	2169.05	-0.0027	1	33.22	0.00077	R	YYGGAEVVDEIELLCQRR	A				File4189 Spectrum5917 scans: 9123
121	1	GLYM_HUMAN	Serine hydroxymethyltransferase, mitochondrial OS=Homo sapiens GN=SHMT2 PE=1 SV=3	55	56414	2	2	2	2	6075	1	1	1	800.067	2397.18	3	2397.17	0.0029	2	36.94	0.00034	R	AALEALGSCLNNKYSEGYPGKR	Y				File4189 Spectrum3123 scans: 5844
122	1	S10A8_HUMAN	Protein S100-A8 OS=Homo sapiens GN=S100A8 PE=1 SV=1	54	10885	1	1	1	1	3311	1	1	1	711.359	1420.7	2	1420.7	0.0006	0	54.23	9.1e-06	K	LLETECPQYIR	K				File4189 Spectrum2669 scans: 5230
123	1	1433T_HUMAN	14-3-3 protein theta OS=Homo sapiens GN=YWHAQ PE=1 SV=1	54	28032	2	2	1	1	4765	1	1	1	966.418	1930.82	2	1930.82	-0.0004	1	45.25	5.7e-05	K	LAEQAERYDDMATCMK	A				File4189 Spectrum2191 scans: 4613
123	1	1433T_HUMAN	14-3-3 protein theta OS=Homo sapiens GN=YWHAQ PE=1 SV=1	54	28032	2	2	1	1	4766	1	1	1	644.615	1930.82	3	1930.82	0	1	23.57	0.0086	K	LAEQAERYDDMATCMK	A				File4189 Spectrum2198 scans: 4623
124	1	MAN1_HUMAN	Inner nuclear membrane protein Man1 OS=Homo sapiens GN=LEMD3 PE=1 SV=2	52	100790	2	2	2	2	5212	1	1	1	1055.54	2109.07	2	2109.07	-0.0037	0	24.78	0.006	R	ISASGPESLLGGPGGASAAPAAGSK	V				File4189 Spectrum3367 scans: 6155
124	1	MAN1_HUMAN	Inner nuclear membrane protein Man1 OS=Homo sapiens GN=LEMD3 PE=1 SV=2	52	100790	2	2	2	2	6831	1	1	1	900.749	2699.22	3	2699.22	0.0044	1	44.2	0.00015	R	SRNLEEAAAAEQGGGCDQVDSSPVPR	Y				File4189 Spectrum2050 scans: 4429
125	1	HS105_HUMAN	Heat shock protein 105 kDa OS=Homo sapiens GN=HSPH1 PE=1 SV=1	52	97716	3	3	3	3	3617	1	1	1	768.389	1534.76	2	1534.76	0.0003	0	45.73	0.00031	R	GCALQCAILSPAFK	V				File4189 Spectrum4546 scans: 7567
125	1	HS105_HUMAN	Heat shock protein 105 kDa OS=Homo sapiens GN=HSPH1 PE=1 SV=1	52	97716	3	3	3	3	6336	1	1	1	833.072	2496.19	3	2496.2	-0.0015	1	14.97	0.039	R	RGPFELEAFYSDPQGVPYPEAK	I				File4189 Spectrum5301 scans: 8430
125	1	HS105_HUMAN	Heat shock protein 105 kDa OS=Homo sapiens GN=HSPH1 PE=1 SV=1	52	97716	3	3	3	3	6698	1	1	1	881.763	2642.27	3	2642.26	0.0036	1	25.09	0.0044	R	AGGIETIANEFSDRCTPSVISFGSK	N				File4189 Spectrum5672 scans: 8844
125		HS74L_HUMAN	Heat shock 70 kDa protein 4L OS=Homo sapiens GN=HSPA4L PE=1 SV=3	46	95479	1	1	1	1	3617	1	0	1	768.389	1534.76	2	1534.76	0.0003	0	45.73	0.00031	R	GCALQCAILSPAFK	V				File4189 Spectrum4546 scans: 7567
126	1	IMA2_HUMAN	Importin subunit alpha-2 OS=Homo sapiens GN=KPNA2 PE=1 SV=1	51	58168	1	1	1	1	4697	1	1	1	950.976	1899.94	2	1899.94	-0.0017	0	51.25	1.6e-05	K	GINSSNVENQLQATQAAR	K				File4189 Spectrum2341 scans: 4805
127	1	QCR2_HUMAN	Cytochrome b-c1 complex subunit 2, mitochondrial OS=Homo sapiens GN=UQCRC2 PE=1 SV=3	51	48584	2	1	2	1	4197	1	1	1	873.412	1744.81	2	1744.81	0.0009	0	51.18	4.4e-05	K	SMAASGNLGHTPFVDEL	-				File4189 Spectrum4773 scans: 7829
127	1	QCR2_HUMAN	Cytochrome b-c1 complex subunit 2, mitochondrial OS=Homo sapiens GN=UQCRC2 PE=1 SV=3	51	48584	2	1	2	1	9868	1	1	1	1154.57	4614.25	4	4614.26	-0.0062	1	3.95	1.6	K	ATQQPFDVSAFNASYSDSGLFGIYTISQATAAGDVIKAAYNQVK	T				File4189 Spectrum8146 scans: 11681
128	1	FKBP8_HUMAN	Peptidyl-prolyl cis-trans isomerase FKBP8 OS=Homo sapiens GN=FKBP8 PE=1 SV=2	51	44990	1	1	1	1	7718	1	1	1	1049.53	3145.58	3	3145.58	-0.0031	0	51.03	1.6e-05	R	EFLAAMEPEPAPAPAPEEWLDILGNGLLR	K				File4189 Spectrum9227 scans: 13090
129	1	1C07_HUMAN	HLA class I histocompatibility antigen, Cw-7 alpha chain OS=Homo sapiens GN=HLA-C PE=1 SV=3	51	41136	1	1	1	1	2389	1	1	1	582.742	1163.47	2	1163.47	0.0004	0	50.9	8.1e-06	R	MSGCDLGPDGR	L				File4189 Spectrum761 scans: 2799
130	1	RL23_HUMAN	60S ribosomal protein L23 OS=Homo sapiens GN=RPL23 PE=1 SV=1	51	14970	1	1	1	1	4877	1	1	1	985.522	1969.03	2	1969.03	-0.0008	0	50.7	1.8e-05	R	ISLGLPVGAVINCADNTGAK	N				File4189 Spectrum5577 scans: 8735
131	1	RBM4_HUMAN	RNA-binding protein 4 OS=Homo sapiens GN=RBM4 PE=1 SV=1	51	40688	1	1	1	1	6964	1	1	1	926.11	2775.31	3	2775.31	-0.0008	0	50.56	1.8e-05	R	ATAPVPTVGEGYGYGHESELSQASAAAR	N				File4189 Spectrum3011 scans: 5686
132	1	1433Z_HUMAN	14-3-3 protein zeta/delta OS=Homo sapiens GN=YWHAZ PE=1 SV=1	50	27899	4	2	3	1	3656	1	1	1	774.861	1547.71	2	1547.71	0.0006	0	8.73	0.65	K	SVTEQGAELSNEER	N				File4189 Spectrum978 scans: 3064
132	1	1433Z_HUMAN	14-3-3 protein zeta/delta OS=Homo sapiens GN=YWHAZ PE=1 SV=1	50	27899	4	2	3	1	4698	1	1	1	951.413	1900.81	2	1900.81	-0.0006	1	37.56	0.00039	K	LAEQAERYDDMAACMK	S				File4189 Spectrum2325 scans: 4785
132	1	1433Z_HUMAN	14-3-3 protein zeta/delta OS=Homo sapiens GN=YWHAZ PE=1 SV=1	50	27899	4	2	3	1	4699	1	1	1	634.611	1900.81	3	1900.81	0.0001	1	28.81	0.003	K	LAEQAERYDDMAACMK	S				File4189 Spectrum2323 scans: 4783
132	1	1433Z_HUMAN	14-3-3 protein zeta/delta OS=Homo sapiens GN=YWHAZ PE=1 SV=1	50	27899	4	2	3	1	6196	1	1	1	813.078	2436.21	3	2436.21	-0.0005	1	8.05	0.18	K	SVTEQGAELSNEERNLLSVAYK	N				File4189 Spectrum4812 scans: 7875
133	1	TCPH_HUMAN	T-complex protein 1 subunit eta OS=Homo sapiens GN=CCT7 PE=1 SV=2	50	59842	1	1	1	1	6739	1	1	1	886.138	2655.39	3	2655.39	0.0033	1	49.96	2.1e-05	R	INALTAASEAACLIVSVDETIKNPR	S				File4189 Spectrum8448 scans: 12035
134	1	TCPG_HUMAN	T-complex protein 1 subunit gamma OS=Homo sapiens GN=CCT3 PE=1 SV=4	50	61066	4	2	4	2	555	1	1	1	401.245	800.476	2	800.476	-0.0001	0	12.48	0.27	K	TIADIIR	T				File4189 Spectrum2838 scans: 5456
134	1	TCPG_HUMAN	T-complex protein 1 subunit gamma OS=Homo sapiens GN=CCT3 PE=1 SV=4	50	61066	4	2	4	2	5261	1	1	1	1066.04	2130.06	2	2130.06	-0.0019	0	36.3	0.00039	K	MLLDPMGGIVMTNDGNAILR	E				File4189 Spectrum6669 scans: 9980
134	1	TCPG_HUMAN	T-complex protein 1 subunit gamma OS=Homo sapiens GN=CCT3 PE=1 SV=4	50	61066	4	2	4	2	6431	1	1	1	845.087	2532.24	3	2532.24	-0.0019	2	28.15	0.0023	R	GASKEILSEVERNLQDAMQVCR	N				File4189 Spectrum6179 scans: 9421
134	1	TCPG_HUMAN	T-complex protein 1 subunit gamma OS=Homo sapiens GN=CCT3 PE=1 SV=4	50	61066	4	2	4	2	6633	1	1	1	873.127	2616.36	3	2616.36	0.0013	0	7.65	0.19	R	NVLLDPQLVPGGGASEMAVAHALTEK	S				File4189 Spectrum6090 scans: 9321
135	1	PCBP1_HUMAN	Poly(rC)-binding protein 1 OS=Homo sapiens GN=PCBP1 PE=1 SV=2	49	37987	4	3	3	2	3989	1	1	1	836.951	1671.89	2	1671.89	0.0006	0	1.02	0.8	R	AITIAGVPQSVTECVK	Q				File4189 Spectrum3829 scans: 6736
135	1	PCBP1_HUMAN	Poly(rC)-binding protein 1 OS=Homo sapiens GN=PCBP1 PE=1 SV=2	49	37987	4	3	3	2	5162	1	1	1	1045.49	2088.97	2	2088.97	-0.0013	0	38.08	0.00035	R	ESTGAQVQVAGDMLPNSTER	A				File4189 Spectrum2980 scans: 5643
135	1	PCBP1_HUMAN	Poly(rC)-binding protein 1 OS=Homo sapiens GN=PCBP1 PE=1 SV=2	49	37987	4	3	3	2	8467	1	1	1	904.224	3612.87	4	3612.87	-0.0014	1	18.69	0.018	R	AITIAGVPQSVTECVKQICLVMLETLSQSPQGR	V				File4189 Spectrum9159 scans: 12993
135	1	PCBP1_HUMAN	Poly(rC)-binding protein 1 OS=Homo sapiens GN=PCBP1 PE=1 SV=2	49	37987	4	3	3	2	8468	1	1	1	1205.3	3612.87	3	3612.87	0.0036	1	21.76	0.0091	R	AITIAGVPQSVTECVKQICLVMLETLSQSPQGR	V				File4189 Spectrum9157 scans: 12989
135		PCBP2_HUMAN	Poly(rC)-binding protein 2 OS=Homo sapiens GN=PCBP2 PE=1 SV=1	38	38955	1	1	1	1	5162	1	0	1	1045.49	2088.97	2	2088.97	-0.0013	0	38.08	0.00035	R	ESTGAQVQVAGDMLPNSTER	A				File4189 Spectrum2980 scans: 5643
136	1	MYH9_HUMAN	Myosin-9 OS=Homo sapiens GN=MYH9 PE=1 SV=4	49	227646	1	1	1	1	7464	1	1	1	1006.5	3016.47	3	3016.47	-0.0012	1	49	2.5e-05	R	DLGEELEALKTELEDTLDSTAAQQELR	S				File4189 Spectrum8934 scans: 12649
137	1	RLA1_HUMAN	60S acidic ribosomal protein P1 OS=Homo sapiens GN=RPLP1 PE=1 SV=1	48	11621	1	1	1	1	4062	1	1	1	851.952	1701.89	2	1701.89	0.0005	0	48.36	2.9e-05	K	AAGVNVEPFWPGLFAK	A				File4189 Spectrum6780 scans: 10108
138	1	TCPZ_HUMAN	T-complex protein 1 subunit zeta OS=Homo sapiens GN=CCT6A PE=1 SV=3	48	58444	1	1	1	1	9061	1	1	1	1006.78	4023.08	4	4023.08	0.0048	1	48.3	6e-05	K	VATAQDDITGDGTTSNVLIIGELLKQADLYISEGLHPR	I				File4189 Spectrum9346 scans: 13261
139	1	RS27A_HUMAN	Ubiquitin-40S ribosomal protein S27a OS=Homo sapiens GN=RPS27A PE=1 SV=2	48	18296	2	2	2	2	4305	1	1	1	894.469	1786.92	2	1786.92	0.0026	0	16.55	0.028	K	TITLEVEPSDTIENVK	A				File4189 Spectrum3886 scans: 6806
139	1	RS27A_HUMAN	Ubiquitin-40S ribosomal protein S27a OS=Homo sapiens GN=RPS27A PE=1 SV=2	48	18296	2	2	2	2	4901	1	0	1	663.024	1986.05	3	1986.05	-0.0019	1	48.21	7.2e-05	K	TITLEVEPSDTIENVKAK	I				File4189 Spectrum3420 scans: 6223
140	1	PRDX5_HUMAN	Peroxiredoxin-5, mitochondrial OS=Homo sapiens GN=PRDX5 PE=1 SV=4	48	22301	3	3	3	3	2628	1	1	1	611.829	1221.64	2	1221.64	0.0004	0	26.4	0.0033	R	FSMVVQDGIVK	A				File4189 Spectrum3654 scans: 6512
140	1	PRDX5_HUMAN	Peroxiredoxin-5, mitochondrial OS=Homo sapiens GN=PRDX5 PE=1 SV=4	48	22301	3	3	3	3	7375	1	1	1	993.189	2976.55	3	2976.54	0.0023	1	24.98	0.0045	R	LLADPTGAFGKETDLLLDDSLVSIFGNR	R				File4189 Spectrum8711 scans: 12365
140	1	PRDX5_HUMAN	Peroxiredoxin-5, mitochondrial OS=Homo sapiens GN=PRDX5 PE=1 SV=4	48	22301	3	3	3	3	7703	1	1	1	784.168	3132.64	4	3132.65	-0.0008	2	24.69	0.0048	R	LLADPTGAFGKETDLLLDDSLVSIFGNRR	L				File4189 Spectrum8130 scans: 11662
141	1	RL19_HUMAN	60S ribosomal protein L19 OS=Homo sapiens GN=RPL19 PE=1 SV=1	47	23565	1	1	1	1	4799	1	1	1	971.968	1941.92	2	1941.92	0.0033	0	46.58	4.3e-05	K	VWLDPNETNEIANANSR	Q				File4189 Spectrum3504 scans: 6328
142	1	EF1D_HUMAN	Elongation factor 1-delta OS=Homo sapiens GN=EEF1D PE=1 SV=5	47	31217	3	2	2	2	5431	1	1	1	729.021	2184.04	3	2184.04	0.001	0	42.02	0.00011	K	SLAGSSGPGASSGTSGDHGELVVR	I				File4189 Spectrum1725 scans: 3996
142	1	EF1D_HUMAN	Elongation factor 1-delta OS=Homo sapiens GN=EEF1D PE=1 SV=5	47	31217	3	2	2	2	7651	1	1	1	1036.9	3107.69	3	3107.69	-0.0027	2	6.75	0.79	R	IASLEVENQSLRGVVQELQQAISKLEAR	L				File4189 Spectrum8787 scans: 12456
142	1	EF1D_HUMAN	Elongation factor 1-delta OS=Homo sapiens GN=EEF1D PE=1 SV=5	47	31217	3	2	2	2	7652	1	1	1	777.931	3107.69	4	3107.69	-0.0003	2	21.01	0.03	R	IASLEVENQSLRGVVQELQQAISKLEAR	L				File4189 Spectrum8758 scans: 12421
143	1	XPO1_HUMAN	Exportin-1 OS=Homo sapiens GN=XPO1 PE=1 SV=1	45	124447	2	2	2	2	5545	1	1	1	1115.48	2228.95	2	2228.95	-0.0023	0	18.96	0.018	R	QMSVPGIFNPHEIPEEMCD	-				File4189 Spectrum5643 scans: 8811
143	1	XPO1_HUMAN	Exportin-1 OS=Homo sapiens GN=XPO1 PE=1 SV=1	45	124447	2	2	2	2	8271	1	1	1	875.946	3499.75	4	3499.75	0.0021	1	40.98	0.00014	R	QLLDFSQKLDINLLDNVVNCLYHGEGAQQR	M				File4189 Spectrum7838 scans: 11334
144	1	RHOA_HUMAN	Transforming protein RhoA OS=Homo sapiens GN=RHOA PE=1 SV=1	45	22096	1	1	1	1	3088	1	1	1	667.299	1332.58	2	1332.58	0.0001	0	45.35	8e-05	R	IGAFGYMECSAK	T				File4189 Spectrum3196 scans: 5943
145	1	ATPG_HUMAN	ATP synthase subunit gamma, mitochondrial OS=Homo sapiens GN=ATP5C1 PE=1 SV=1	45	33032	2	1	1	1	4844	1	1	1	652.374	1954.1	3	1954.1	0.0004	1	9.6	0.36	R	QAVITKELIEIISGAAALD	-				File4189 Spectrum8392 scans: 11971
145	1	ATPG_HUMAN	ATP synthase subunit gamma, mitochondrial OS=Homo sapiens GN=ATP5C1 PE=1 SV=1	45	33032	2	1	1	1	4845	1	1	1	978.057	1954.1	2	1954.1	0.0013	1	45.18	9.9e-05	R	QAVITKELIEIISGAAALD	-				File4189 Spectrum8379 scans: 11956
146	1	PKP3_HUMAN	Plakophilin-3 OS=Homo sapiens GN=PKP3 PE=1 SV=1	45	87485	1	1	1	1	3984	1	1	1	836.403	1670.79	2	1670.79	0.0009	0	45.11	0.00022	R	AGGLDWPEATEVSPSR	T				File4189 Spectrum3648 scans: 6504
147	1	OPA1_HUMAN	Dynamin-like 120 kDa protein, mitochondrial OS=Homo sapiens GN=OPA1 PE=1 SV=3	45	112131	2	2	2	2	5649	1	1	1	753.411	2257.21	3	2257.21	0.0014	1	18.16	0.02	R	VVVVGDQSAGKTSVLEMIAQAR	I				File4189 Spectrum5186 scans: 8301
147	1	OPA1_HUMAN	Dynamin-like 120 kDa protein, mitochondrial OS=Homo sapiens GN=OPA1 PE=1 SV=3	45	112131	2	2	2	2	7893	1	1	1	1087.17	3258.5	3	3258.5	-0.0052	0	43.9	0.0002	K	SLIDMYSEVLDVLSDYDASYNTQDHLPR	V				File4189 Spectrum9269 scans: 13146
148	1	SYWC_HUMAN	Tryptophan--tRNA ligase, cytoplasmic OS=Homo sapiens GN=WARS PE=1 SV=2	45	53474	1	1	1	1	4298	1	1	1	892.923	1783.83	2	1783.83	0.0008	0	44.53	6.7e-05	K	MSASDPNSSIFLTDTAK	Q				File4189 Spectrum3426 scans: 6230
149	1	RT28_HUMAN	28S ribosomal protein S28, mitochondrial OS=Homo sapiens GN=MRPS28 PE=1 SV=1	44	21001	1	1	1	1	7141	1	1	1	950.502	2848.48	3	2848.48	0.0015	1	44.12	7.3e-05	R	FLGATTDTTVLEANAVLLGIQESKDSR	S				File4189 Spectrum6556 scans: 9855
150	1	AT2B1_HUMAN	Plasma membrane calcium-transporting ATPase 1 OS=Homo sapiens GN=ATP2B1 PE=1 SV=3	44	139637	1	1	1	1	2510	1	1	1	596.293	1190.57	2	1190.57	0.0005	0	44.05	7.4e-05	R	MVTGDNINTAR	A				File4189 Spectrum769 scans: 2810
151	1	NAA50_HUMAN	N-alpha-acetyltransferase 50 OS=Homo sapiens GN=NAA50 PE=1 SV=1	44	19614	2	1	1	1	4463	1	1	1	914.463	1826.91	2	1826.91	-0.0016	2	8.36	0.16	K	NLKVPSGQNADVQKTDN	-				File4189 Spectrum860 scans: 2924
151	1	NAA50_HUMAN	N-alpha-acetyltransferase 50 OS=Homo sapiens GN=NAA50 PE=1 SV=1	44	19614	2	1	1	1	4464	1	1	1	609.978	1826.91	3	1826.91	0	2	44.05	7.4e-05	K	NLKVPSGQNADVQKTDN	-				File4189 Spectrum856 scans: 2920
152	1	ACSL3_HUMAN	Long-chain-fatty-acid--CoA ligase 3 OS=Homo sapiens GN=ACSL3 PE=1 SV=3	44	81338	1	1	1	1	7330	1	1	1	978.492	2932.45	3	2932.45	0.0017	1	43.99	7.5e-05	R	SVNSLDGLASVLYPGCDTLDKVFTYAK	N				File4189 Spectrum7284 scans: 10682
153	1	RL23A_HUMAN	60S ribosomal protein L23a OS=Homo sapiens GN=RPL23A PE=1 SV=1	44	17684	2	2	1	1	4373	1	1	1	600.996	1799.97	3	1799.97	0.0001	1	21.28	0.01	R	LAPDYDALDVANKIGII	-				File4189 Spectrum6574 scans: 9874
153	1	RL23A_HUMAN	60S ribosomal protein L23a OS=Homo sapiens GN=RPL23A PE=1 SV=1	44	17684	2	2	1	1	4374	1	1	1	900.991	1799.97	2	1799.97	0.0009	1	36.94	0.00034	R	LAPDYDALDVANKIGII	-				File4189 Spectrum6560 scans: 9860
154	1	EFTU_HUMAN	Elongation factor Tu, mitochondrial OS=Homo sapiens GN=TUFM PE=1 SV=2	43	49852	2	1	2	1	2613	5	0	1	608.333	1214.65	2	1214.64	0.007	1	6.12	3.6	R	QPMILEKGQR	F	Oxidation (M)	0.0010000000.0		File4189 Spectrum2290 scans: 4743
154	1	EFTU_HUMAN	Elongation factor Tu, mitochondrial OS=Homo sapiens GN=TUFM PE=1 SV=2	43	49852	2	1	2	1	6372	1	1	1	836.101	2505.28	3	2505.28	0.0011	2	43.34	8.6e-05	R	TIGTGLVTNTLAMTEEEKNIKWG	-				File4189 Spectrum5939 scans: 9151
155	1	CADH1_HUMAN	Cadherin-1 OS=Homo sapiens GN=CDH1 PE=1 SV=3	43	97852	2	2	1	1	3516	1	1	1	747.405	1492.8	2	1492.8	-0.0004	1	33.43	0.00073	K	MALEVGDYKINLK	L				File4189 Spectrum4598 scans: 7628
155	1	CADH1_HUMAN	Cadherin-1 OS=Homo sapiens GN=CDH1 PE=1 SV=3	43	97852	2	2	1	1	3517	1	1	1	498.607	1492.8	3	1492.8	0.0034	1	23.88	0.0058	K	MALEVGDYKINLK	L				File4189 Spectrum4588 scans: 7617
156	1	COMT_HUMAN	Catechol O-methyltransferase OS=Homo sapiens GN=COMT PE=1 SV=2	43	30474	1	1	1	1	4466	1	1	1	914.487	1826.96	2	1826.96	0.003	0	42.67	0.0001	R	LITIEINPDCAAITQR	M				File4189 Spectrum4595 scans: 7625
157	1	IF4G1_HUMAN	Eukaryotic translation initiation factor 4 gamma 1 OS=Homo sapiens GN=EIF4G1 PE=1 SV=4	42	176124	3	2	3	2	4246	1	1	1	884.468	1766.92	2	1766.92	0.002	0	29.77	0.0016	R	GLPLVDDGGWNTVPISK	G				File4189 Spectrum5335 scans: 8468
157	1	IF4G1_HUMAN	Eukaryotic translation initiation factor 4 gamma 1 OS=Homo sapiens GN=EIF4G1 PE=1 SV=4	42	176124	3	2	3	2	4735	1	1	1	640.657	1918.95	3	1918.95	-0.0006	1	26.14	0.0035	R	FSALQQAVPTESTDNRR	V				File4189 Spectrum2161 scans: 4575
157	1	IF4G1_HUMAN	Eukaryotic translation initiation factor 4 gamma 1 OS=Homo sapiens GN=EIF4G1 PE=1 SV=4	42	176124	3	2	3	2	5074	2	1	1	1028.54	2055.06	2	2055.05	0.0086	0	0.33	1	R	ALMTAVCYSAIIFETPLR	V				File4189 Spectrum4274 scans: 7253
158	1	CATD_HUMAN	Cathepsin D OS=Homo sapiens GN=CTSD PE=1 SV=1	41	45037	2	2	1	1	4905	1	1	1	995.013	1988.01	2	1988.01	-0.0006	0	31.07	0.0012	K	AIGAVPLIQGEYMIPCEK	V				File4189 Spectrum5628 scans: 8794
158	1	CATD_HUMAN	Cathepsin D OS=Homo sapiens GN=CTSD PE=1 SV=1	41	45037	2	2	1	1	4946	1	1	1	1003.01	2004.01	2	2004.01	0.0001	0	24.35	0.0052	K	AIGAVPLIQGEYMIPCEK	V	Oxidation (M)	0.000000000000100000.0		File4189 Spectrum4809 scans: 7871
159	1	COX7C_HUMAN	Cytochrome c oxidase subunit 7C, mitochondrial OS=Homo sapiens GN=COX7C PE=1 SV=1	41	7298	1	1	1	1	4891	1	1	1	990	1977.99	2	1977.98	0.0016	0	41.32	0.00013	K	MCLYFGSAFATPFLVVR	H				File4189 Spectrum7799 scans: 11287
160	1	RUXE_HUMAN	Small nuclear ribonucleoprotein E OS=Homo sapiens GN=SNRPE PE=1 SV=1	41	10854	1	1	1	1	4202	1	1	1	873.477	1744.94	2	1744.94	0	1	41.03	0.00014	R	IMLKGDNITLLQSVSN	-				File4189 Spectrum4631 scans: 7669
161	1	LDHA_HUMAN	L-lactate dehydrogenase A chain OS=Homo sapiens GN=LDHA PE=1 SV=2	40	36950	1	1	1	1	3881	1	1	1	818.423	1634.83	2	1634.83	0.0016	1	40.26	0.00017	K	SADTLWGIQKELQF	-				File4189 Spectrum6411 scans: 9694
162	1	CAPZB_HUMAN	F-actin-capping protein subunit beta OS=Homo sapiens GN=CAPZB PE=1 SV=4	40	31616	1	1	1	1	7691	1	1	1	1041.89	3122.65	3	3122.65	-0.0007	1	39.85	0.00018	K	NLSDLIDLVPSLCEDLLSSVDQPLKIAR	D				File4189 Spectrum9512 scans: 13570
163	1	RTCB_HUMAN	tRNA-splicing ligase RtcB homolog OS=Homo sapiens GN=C22orf28 PE=1 SV=1	39	55688	2	1	2	1	5298	1	1	1	716.377	2146.11	3	2146.11	-0.0009	1	39.44	0.0002	R	NLDFQDVLDKLADMGIAIR	V				File4189 Spectrum8630 scans: 12262
163	1	RTCB_HUMAN	tRNA-splicing ligase RtcB homolog OS=Homo sapiens GN=C22orf28 PE=1 SV=1	39	55688	2	1	2	1	6556	1	1	1	861.415	2581.22	3	2581.24	-0.0154	1	1.69	0.69	R	IASPEGQDYLKGMAAAGNYAWVNR	S				File4189 Spectrum2667 scans: 5227
164	1	RS7_HUMAN	40S ribosomal protein S7 OS=Homo sapiens GN=RPS7 PE=1 SV=1	39	22113	1	1	1	1	4297	1	1	1	892.449	1782.88	2	1782.88	0.0004	1	39.33	0.00021	K	LTGKDVNFEFPEFQL	-				File4189 Spectrum6686 scans: 10003
165	1	MT1E_HUMAN	Metallothionein-1E OS=Homo sapiens GN=MT1E PE=1 SV=1	39	7150	1	1	1	1	3394	1	1	1	723.259	1444.5	2	1444.5	-0.0001	0	38.53	0.00014	K	SCCSCCPVGCAK	C				File4189 Spectrum212 scans: 2115
166	1	SPTC1_HUMAN	Serine palmitoyltransferase 1 OS=Homo sapiens GN=SPTLC1 PE=1 SV=1	38	53281	3	2	2	2	3576	1	1	1	759.873	1517.73	2	1517.73	-0.001	0	36.95	0.00034	R	LLQEIVDQCMNR	S				File4189 Spectrum3633 scans: 6484
166	1	SPTC1_HUMAN	Serine palmitoyltransferase 1 OS=Homo sapiens GN=SPTLC1 PE=1 SV=1	38	53281	3	2	2	2	7564	1	1	1	1018.89	3053.65	3	3053.65	0.0001	2	10.11	0.34	R	VVVTVEQTEEELERAASTIKEVAQAVLL	-				File4189 Spectrum10444 scans: 15221
166	1	SPTC1_HUMAN	Serine palmitoyltransferase 1 OS=Homo sapiens GN=SPTLC1 PE=1 SV=1	38	53281	3	2	2	2	7565	1	1	1	1018.89	3053.65	3	3053.65	0.0012	2	18.04	0.053	R	VVVTVEQTEEELERAASTIKEVAQAVLL	-				File4189 Spectrum10411 scans: 15166
167	1	PRDX1_HUMAN	Peroxiredoxin-1 OS=Homo sapiens GN=PRDX1 PE=1 SV=1	38	22324	3	2	3	2	3172	1	0	1	680.403	1358.79	2	1358.79	-0.0002	1	38.22	0.00048	R	GLFIIDDKGILR	Q				File4189 Spectrum5164 scans: 8276
167	1	PRDX1_HUMAN	Peroxiredoxin-1 OS=Homo sapiens GN=PRDX1 PE=1 SV=1	38	22324	3	2	3	2	4896	1	0	1	661.678	1982.01	3	1982.01	0.0005	1	15.14	0.038	R	TIAQDYGVLKADEGISFR	G				File4189 Spectrum4250 scans: 7226
167	1	PRDX1_HUMAN	Peroxiredoxin-1 OS=Homo sapiens GN=PRDX1 PE=1 SV=1	38	22324	3	2	3	2	6490	1	0	1	851.49	2551.45	3	2551.45	-0.001	2	8.98	0.23	R	GLFIIDDKGILRQITVNDLPVGR	S				File4189 Spectrum6446 scans: 9734
167		PRDX4_HUMAN	Peroxiredoxin-4 OS=Homo sapiens GN=PRDX4 PE=1 SV=1	38	30749	1	1	1	1	3172	1	0	1	680.403	1358.79	2	1358.79	-0.0002	1	38.22	0.00048	R	GLFIIDDKGILR	Q				File4189 Spectrum5164 scans: 8276
168	1	HNRPM_HUMAN	Heterogeneous nuclear ribonucleoprotein M OS=Homo sapiens GN=HNRNPM PE=1 SV=3	37	77749	3	2	3	2	255	1	1	1	373.187	744.359	2	744.359	0.0001	0	30.54	0.0037	R	MGPGIDR	L				File4189 Spectrum573 scans: 2562
168	1	HNRPM_HUMAN	Heterogeneous nuclear ribonucleoprotein M OS=Homo sapiens GN=HNRNPM PE=1 SV=3	37	77749	3	2	3	2	1305	1	1	1	480.256	958.496	2	958.491	0.006	1	0.58	0.88	K	MDERALPK	G				File4189 Spectrum2221 scans: 4653
168	1	HNRPM_HUMAN	Heterogeneous nuclear ribonucleoprotein M OS=Homo sapiens GN=HNRNPM PE=1 SV=3	37	77749	3	2	3	2	3325	1	1	1	714.36	1426.71	2	1426.71	-0.0002	0	25.07	0.011	R	MGPAMGPALGAGIER	M				File4189 Spectrum3404 scans: 6204
169	1	RL9_HUMAN	60S ribosomal protein L9 OS=Homo sapiens GN=RPL9 PE=1 SV=1	37	21964	1	1	1	1	4930	1	1	1	999.988	1997.96	2	1997.96	0.0039	1	36.91	0.00035	K	FLDGIYVSEKGTVQQADE	-				File4189 Spectrum3834 scans: 6742
170	1	R39L5_HUMAN	Putative 60S ribosomal protein L39-like 5 OS=Homo sapiens GN=RPL39P5 PE=5 SV=2	37	6319	1	1	1	1	3016	1	1	1	436.583	1306.73	3	1306.73	0.0001	0	36.51	0.00038	K	QNRPIPQWIR	M				File4189 Spectrum2733 scans: 5319
171	1	ALBU_HUMAN	Serum albumin OS=Homo sapiens GN=ALB PE=1 SV=2	36	71317	2	1	2	1	3890	1	1	1	547.318	1638.93	3	1638.93	0.0011	1	36.22	0.00099	K	KVPQVSTPTLVEVSR	N				File4189 Spectrum2939 scans: 5587
171	1	ALBU_HUMAN	Serum albumin OS=Homo sapiens GN=ALB PE=1 SV=2	36	71317	2	1	2	1	4432	2	1	1	909.91	1817.81	2	1817.82	-0.013	2	0.07	3.2	K	RYKAAFTECCQAADK	A				File4189 Spectrum4286 scans: 7268
172	1	RAN_HUMAN	GTP-binding nuclear protein Ran OS=Homo sapiens GN=RAN PE=1 SV=3	36	24579	1	1	1	1	4299	1	1	1	595.642	1783.9	3	1783.9	0.0002	0	35.93	0.00043	K	SNYNFEKPFLWLAR	K				File4189 Spectrum6078 scans: 9306
173	1	MET15_HUMAN	Probable methyltransferase-like protein 15 OS=Homo sapiens GN=METTL15 PE=2 SV=1	36	46377	1	1	1	1	7619	1	1	1	1030.18	3087.51	3	3087.51	0.0004	1	35.72	0.00045	R	MDGGRYPDMPTAADVVNALDQQALASILR	T				File4189 Spectrum8090 scans: 11616
174	1	AAAT_HUMAN	Neutral amino acid transporter B(0) OS=Homo sapiens GN=SLC1A5 PE=1 SV=2	35	57018	1	1	1	1	5337	1	1	1	1079.59	2157.16	2	2157.16	0.0024	0	35.3	0.00076	K	SELPLDPLPVPTEEGNPLLK	H				File4189 Spectrum6438 scans: 9726
175	1	ATPO_HUMAN	ATP synthase subunit O, mitochondrial OS=Homo sapiens GN=ATP5O PE=1 SV=1	35	23377	2	1	2	1	81	1	1	1	359.7	717.385	2	717.384	0.0004	1	7.66	0.19	R	AMREIV	-				File4189 Spectrum1486 scans: 3702
175	1	ATPO_HUMAN	ATP synthase subunit O, mitochondrial OS=Homo sapiens GN=ATP5O PE=1 SV=1	35	23377	2	1	2	1	3035	1	1	1	439.594	1315.76	3	1315.76	0	1	35.12	0.0015	K	VAASVLNPYVKR	S				File4189 Spectrum2233 scans: 4668
176	1	RASH_HUMAN	GTPase HRas OS=Homo sapiens GN=HRAS PE=1 SV=1	35	21627	1	1	1	1	3251	1	1	1	699.357	1396.7	2	1396.7	0.0006	0	34.59	0.00057	R	QGVEDAFYTLVR	E				File4189 Spectrum5409 scans: 8550
177	1	GRN_HUMAN	Granulins OS=Homo sapiens GN=GRN PE=1 SV=2	35	68518	2	1	2	1	3718	1	1	1	784.315	1566.61	2	1566.61	0.0033	0	12.12	0.061	R	CPDGSTCCELPSGK	Y				File4189 Spectrum778 scans: 2821
177	1	GRN_HUMAN	Granulins OS=Homo sapiens GN=GRN PE=1 SV=2	35	68518	2	1	2	1	4685	1	1	1	946.981	1891.95	2	1891.95	0.0007	1	34.57	0.00057	R	SCEKEVVSAQPATFLAR	S				File4189 Spectrum3010 scans: 5684
178	1	PRP6_HUMAN	Pre-mRNA-processing factor 6 OS=Homo sapiens GN=PRPF6 PE=1 SV=1	34	107656	3	1	3	1	928	1	1	1	440.704	879.393	2	879.394	-0.001	0	7.59	0.22	R	NTLMDMR	L				File4189 Spectrum2019 scans: 4389
178	1	PRP6_HUMAN	Pre-mRNA-processing factor 6 OS=Homo sapiens GN=PRPF6 PE=1 SV=1	34	107656	3	1	3	1	3082	5	0	1	665.367	1328.72	2	1328.71	0.0101	2	3.81	4.6	K	AREWFHRTVK	I				File4189 Spectrum6292 scans: 9555
178	1	PRP6_HUMAN	Pre-mRNA-processing factor 6 OS=Homo sapiens GN=PRPF6 PE=1 SV=1	34	107656	3	1	3	1	4200	1	1	1	873.449	1744.88	2	1744.88	-0.0008	0	34.46	0.00059	R	LSQVSDSVSGQTVVDPK	G				File4189 Spectrum1968 scans: 4321
179	1	SF3B5_HUMAN	Splicing factor 3B subunit 5 OS=Homo sapiens GN=SF3B5 PE=1 SV=1	34	10243	1	1	1	1	4007	1	1	1	841.88	1681.74	2	1681.74	0.0009	0	34.09	0.0014	K	MLQPCGPPADKPEEN	-				File4189 Spectrum1406 scans: 3604
180	1	SNW1_HUMAN	SNW domain-containing protein 1 OS=Homo sapiens GN=SNW1 PE=1 SV=1	34	61514	1	1	1	1	6905	1	1	1	916.443	2746.31	3	2746.31	0.0018	0	33.79	0.00068	R	LLEDFGDGGAFPEIHVAQYPLDMGR	K				File4189 Spectrum6415 scans: 9698
181	1	LAT1_HUMAN	Large neutral amino acids transporter small subunit 1 OS=Homo sapiens GN=SLC7A5 PE=1 SV=2	33	55659	2	1	1	1	4098	1	1	1	571.632	1711.87	3	1711.87	0.0006	2	33.26	0.00076	R	ALAAPAAEEKEEAREK	M				File4189 Spectrum377 scans: 2322
181	1	LAT1_HUMAN	Large neutral amino acids transporter small subunit 1 OS=Homo sapiens GN=SLC7A5 PE=1 SV=2	33	55659	2	1	1	1	4099	1	1	1	856.945	1711.88	2	1711.87	0.0014	2	4.78	0.36	R	ALAAPAAEEKEEAREK	M				File4189 Spectrum383 scans: 2329
182	1	IDH3B_HUMAN	Isocitrate dehydrogenase [NAD] subunit beta, mitochondrial OS=Homo sapiens GN=IDH3B PE=1 SV=2	33	42442	1	1	1	1	4429	1	1	1	908.974	1815.93	2	1815.93	-0.0004	0	32.96	0.00081	R	NIANPTAMLLSASNMLR	H				File4189 Spectrum7050 scans: 10413
183	1	TCPQ_HUMAN	T-complex protein 1 subunit theta OS=Homo sapiens GN=CCT8 PE=1 SV=4	32	60153	2	1	2	1	3159	1	1	1	677.883	1353.75	2	1353.75	0.0003	0	32.3	0.00096	R	LVPGGGATEIELAK	Q				File4189 Spectrum2933 scans: 5578
183	1	TCPQ_HUMAN	T-complex protein 1 subunit theta OS=Homo sapiens GN=CCT8 PE=1 SV=4	32	60153	2	1	2	1	7219	1	1	1	721.105	2880.39	4	2880.39	-0.0006	2	4.13	0.41	R	GSTDNLMDDIERAVDDGVNTFKVLTR	D				File4189 Spectrum9486 scans: 13517
184	1	IMMT_HUMAN	Mitochondrial inner membrane protein OS=Homo sapiens GN=IMMT PE=1 SV=1	32	84026	2	1	2	1	7633	1	1	1	1031.21	3090.62	3	3090.62	0.0017	1	2.31	0.61	R	MTLETKQIVEILTAYASAVGIGTTQVQPE	-				File4189 Spectrum9168 scans: 13007
184	1	IMMT_HUMAN	Mitochondrial inner membrane protein OS=Homo sapiens GN=IMMT PE=1 SV=1	32	84026	2	1	2	1	8476	1	1	1	904.992	3615.94	4	3615.93	0.005	1	32.21	0.0019	K	SLEDALRQTASVTLQAIAAQNAAVQAVNAHSNILK	A				File4189 Spectrum8186 scans: 11729
185	1	LRC59_HUMAN	Leucine-rich repeat-containing protein 59 OS=Homo sapiens GN=LRRC59 PE=1 SV=1	32	35308	1	1	1	1	7293	1	1	1	730.134	2916.51	4	2916.51	-0.0026	1	32.04	0.00099	K	ATILDLSCNKLTTLPSDFCGLTHLVK	L				File4189 Spectrum6691 scans: 10009
186	1	MCM4_HUMAN	DNA replication licensing factor MCM4 OS=Homo sapiens GN=MCM4 PE=1 SV=5	32	97068	1	1	1	1	7088	1	1	1	940.809	2819.4	3	2819.41	-0.0004	1	31.79	0.001	R	FIDPLAKEEENVGIDITEPLYMQR	L				File4189 Spectrum6442 scans: 9730
187	1	TMX1_HUMAN	Thioredoxin-related transmembrane protein 1 OS=Homo sapiens GN=TMX1 PE=1 SV=1	32	32170	1	1	1	1	1895	1	1	1	538.285	1074.56	2	1074.56	0.0003	1	31.72	0.0011	R	SLGPSLATDKS	-				File4189 Spectrum1569 scans: 3804
188	1	XP32_HUMAN	Skin-specific protein 32 OS=Homo sapiens GN=XP32 PE=1 SV=1	32	28557	2	1	2	1	1753	1	1	1	516.801	1031.59	2	1031.59	-0.0004	1	4.34	0.39	R	TFGVSPLRR	W				File4189 Spectrum1867 scans: 4178
188	1	XP32_HUMAN	Skin-specific protein 32 OS=Homo sapiens GN=XP32 PE=1 SV=1	32	28557	2	1	2	1	4694	1	1	1	633.537	1897.59	3	1897.59	-0.0003	1	31.68	0.00068	R	SRGPACCDHEDDCCC	-				File4189 Spectrum41 scans: 1923
189	1	ODO1_HUMAN	2-oxoglutarate dehydrogenase, mitochondrial OS=Homo sapiens GN=OGDH PE=1 SV=3	32	117059	1	1	1	1	4191	1	1	1	872.943	1743.87	2	1743.87	-0.0013	1	31.66	0.0011	R	LLDTAFDLDVFKNFS	-				File4189 Spectrum7387 scans: 10797
190	1	1433B_HUMAN	14-3-3 protein beta/alpha OS=Homo sapiens GN=YWHAB PE=1 SV=3	31	28179	1	1	1	1	4393	1	1	1	906.916	1811.82	2	1811.82	-0.0006	1	30.58	0.0039	K	LAEQAERYDDMAAAMK	A				File4189 Spectrum2506 scans: 5032
191	1	DDX5_HUMAN	Probable ATP-dependent RNA helicase DDX5 OS=Homo sapiens GN=DDX5 PE=1 SV=1	31	69618	1	1	1	1	2775	1	1	1	418.214	1251.62	3	1251.62	0.001	1	30.56	0.0014	R	TAQEVETYRR	S				File4189 Spectrum208 scans: 2110
192	1	CD2B2_HUMAN	CD2 antigen cytoplasmic tail-binding protein 2 OS=Homo sapiens GN=CD2BP2 PE=1 SV=1	30	37737	1	1	1	1	2853	1	1	1	634.834	1267.65	2	1267.65	0.001	0	30.06	0.0015	K	LVDPVAGSGGPGSR	F				File4189 Spectrum1629 scans: 3885
193	1	PLP2_HUMAN	Proteolipid protein 2 OS=Homo sapiens GN=PLP2 PE=1 SV=1	30	17022	1	1	1	1	2759	1	1	1	624.796	1247.58	2	1247.58	-0.0004	0	29.88	0.0051	R	HTAAPTDPADGPV	-				File4189 Spectrum1128 scans: 3252
194	1	TR150_HUMAN	Thyroid hormone receptor-associated protein 3 OS=Homo sapiens GN=THRAP3 PE=1 SV=2	30	108658	1	1	1	1	4036	1	1	1	846.879	1691.74	2	1691.74	0.0006	1	29.88	0.003	R	NREEEWDPEYTPK	S				File4189 Spectrum2036 scans: 4411
195	1	RS20_HUMAN	40S ribosomal protein S20 OS=Homo sapiens GN=RPS20 PE=1 SV=1	29	13478	2	2	2	2	3143	1	1	1	675.885	1349.76	2	1349.76	-0.0003	0	25.18	0.0076	R	LIDLHSPSEIVK	Q				File4189 Spectrum3101 scans: 5814
195	1	RS20_HUMAN	40S ribosomal protein S20 OS=Homo sapiens GN=RPS20 PE=1 SV=1	29	13478	2	2	2	2	8130	1	1	1	1134.95	3401.82	3	3401.82	-0.0004	1	20.87	0.027	R	LIDLHSPSEIVKQITSISIEPGVEVEVTIADA	-				File4189 Spectrum8227 scans: 11776
196	1	NDUS1_HUMAN	NADH-ubiquinone oxidoreductase 75 kDa subunit, mitochondrial OS=Homo sapiens GN=NDUFS1 PE=1 SV=3	28	80443	2	1	2	1	5166	1	1	1	1047.03	2092.05	2	2092.05	0.0023	0	28.23	0.0023	R	ALSEIAGMTLPYDTLDQVR	N				File4189 Spectrum6145 scans: 9382
196	1	NDUS1_HUMAN	NADH-ubiquinone oxidoreductase 75 kDa subunit, mitochondrial OS=Homo sapiens GN=NDUFS1 PE=1 SV=3	28	80443	2	1	2	1	8005	1	1	1	1105.93	3314.76	3	3314.76	-0.0022	1	15.25	0.1	K	LVNQQLLADPLVPPQLTIKDFYMTDSISR	A				File4189 Spectrum7078 scans: 10444
197	1	ADRM1_HUMAN	Proteasomal ubiquitin receptor ADRM1 OS=Homo sapiens GN=ADRM1 PE=1 SV=2	27	42412	1	1	1	1	3720	1	1	1	784.381	1566.75	2	1566.75	-0.0003	0	27.46	0.0027	R	SQSAAVTPSSTTSSTR	A				File4189 Spectrum203 scans: 2104
198	1	ADT2_HUMAN	ADP/ATP translocase 2 OS=Homo sapiens GN=SLC25A5 PE=1 SV=7	27	33059	2	2	2	2	4427	1	1	1	908.922	1815.83	2	1815.83	0.0004	1	25.84	0.0038	R	KGTDIMYTGTLDCWR	K				File4189 Spectrum3874 scans: 6791
198	1	ADT2_HUMAN	ADP/ATP translocase 2 OS=Homo sapiens GN=SLC25A5 PE=1 SV=7	27	33059	2	2	2	2	4945	1	1	1	668.689	2003.04	3	2003.04	0.0011	2	14.92	0.04	R	GMGGAFVLVLYDEIKKYT	-				File4189 Spectrum8816 scans: 12494
199	1	AP2M1_HUMAN	AP-2 complex subunit mu OS=Homo sapiens GN=AP2M1 PE=1 SV=2	27	49965	2	2	2	2	1491	1	1	1	493.224	984.434	2	984.433	0.0005	1	25.63	0.0064	R	SGIYETRC	-				File4189 Spectrum538 scans: 2519
199	1	AP2M1_HUMAN	AP-2 complex subunit mu OS=Homo sapiens GN=AP2M1 PE=1 SV=2	27	49965	2	2	2	2	4543	1	1	1	617.282	1848.82	3	1848.82	0.0001	0	16.5	0.028	K	QSIAIDDCTFHQCVR	L				File4189 Spectrum2515 scans: 5044
200	1	F207A_HUMAN	Protein FAM207A OS=Homo sapiens GN=FAM207A PE=1 SV=2	27	25441	1	1	1	1	2981	1	1	1	648.885	1295.76	2	1295.76	-0.0001	0	26.73	0.0084	R	ASPLVAIGQTLAR	Q				File4189 Spectrum4887 scans: 7960
201	1	GTR1_HUMAN	Solute carrier family 2, facilitated glucose transporter member 1 OS=Homo sapiens GN=SLC2A1 PE=1 SV=2	27	54391	1	1	1	1	4805	1	1	1	649.303	1944.89	3	1944.88	0.0024	1	26.69	0.0031	R	GTADVTHDLQEMKEESR	Q				File4189 Spectrum2351 scans: 4818
202	1	MPCP_HUMAN	Phosphate carrier protein, mitochondrial OS=Homo sapiens GN=SLC25A3 PE=1 SV=2	25	40525	1	1	1	1	4529	1	1	1	922.487	1842.96	2	1842.96	0.0002	1	25.49	0.0041	R	IQTQPGYANTLRDAAPK	M				File4189 Spectrum2073 scans: 4461
203	1	MYOF_HUMAN	Myoferlin OS=Homo sapiens GN=MYOF PE=1 SV=1	25	236100	1	1	1	1	4948	1	1	1	669.027	2004.06	3	2004.06	-0.0021	1	24.67	0.0049	R	SIFSPVVKLNSEMDITPK	L				File4189 Spectrum5201 scans: 8317
204	1	NDUV1_HUMAN	NADH dehydrogenase [ubiquinone] flavoprotein 1, mitochondrial OS=Homo sapiens GN=NDUFV1 PE=1 SV=4	25	51469	1	1	1	1	7817	1	1	1	1070.87	3209.58	3	3209.58	0.0023	0	24.51	0.005	K	SVCETVLMDFDALVQAQTGLGTAAVIVMDR	S				File4189 Spectrum9608 scans: 13775
205	1	BAG2_HUMAN	BAG family molecular chaperone regulator 2 OS=Homo sapiens GN=BAG2 PE=1 SV=1	24	23928	1	1	1	1	3013	1	1	1	654.32	1306.63	2	1306.63	-0.0002	1	24.03	0.0056	K	TLQQNAESRFN	-				File4189 Spectrum1364 scans: 3542
206	1	RAB1B_HUMAN	Ras-related protein Rab-1B OS=Homo sapiens GN=RAB1B PE=1 SV=1	24	22328	2	1	2	1	4655	1	1	1	942.945	1883.87	2	1883.88	-0.0009	0	11.63	0.081	K	NATNVEQAFMTMAAEIK	K	Oxidation (M)	0.00000000010000000.0		File4189 Spectrum6378 scans: 9657
206	1	RAB1B_HUMAN	Ras-related protein Rab-1B OS=Homo sapiens GN=RAB1B PE=1 SV=1	24	22328	2	1	2	1	6492	1	1	1	851.774	2552.3	3	2552.3	-0.002	1	23.61	0.0075	K	VVDNTTAKEFADSLGIPFLETSAK	N				File4189 Spectrum6665 scans: 9976
207	1	SF3B2_HUMAN	Splicing factor 3B subunit 2 OS=Homo sapiens GN=SF3B2 PE=1 SV=2	23	100279	2	1	2	1	4123	1	1	1	863.478	1724.94	2	1724.94	-0.0008	1	23.3	0.0065	R	AAVLLEQERQQEIAK	M				File4189 Spectrum1954 scans: 4303
207	1	SF3B2_HUMAN	Splicing factor 3B subunit 2 OS=Homo sapiens GN=SF3B2 PE=1 SV=2	23	100279	2	1	2	1	7891	1	1	1	1085.58	3253.72	3	3253.72	-0.0014	2	0.21	4.7	R	QQEIAKMGTPVPRPPQDMGQIGVRTPLGPR	V				File4189 Spectrum8267 scans: 11825
208	1	CHTOP_HUMAN	Chromatin target of PRMT1 protein OS=Homo sapiens GN=CHTOP PE=1 SV=2	23	26380	1	1	1	1	6192	1	1	1	812.36	2434.06	3	2434.06	-0.0002	1	23.3	0.012	K	TKGHLDAELDAYMAQTDPETND	-				File4189 Spectrum3604 scans: 6448
209	1	RM34_HUMAN	39S ribosomal protein L34, mitochondrial OS=Homo sapiens GN=MRPL34 PE=1 SV=1	23	10159	2	2	2	2	2307	1	1	1	575.28	1148.55	2	1148.55	-0.0002	0	19.55	0.015	R	GNEYQPSNIK	R				File4189 Spectrum675 scans: 2692
209	1	RM34_HUMAN	39S ribosomal protein L34, mitochondrial OS=Homo sapiens GN=MRPL34 PE=1 SV=1	23	10159	2	2	2	2	3004	1	1	1	435.89	1304.65	3	1304.65	-0.0004	1	17.65	0.022	R	GNEYQPSNIKR	K				File4189 Spectrum350 scans: 2284
210	1	NDUV2_HUMAN	NADH dehydrogenase [ubiquinone] flavoprotein 2, mitochondrial OS=Homo sapiens GN=NDUFV2 PE=1 SV=2	23	27659	1	1	1	1	7369	1	1	1	992.165	2973.47	3	2973.47	0.0082	2	23.16	0.0067	R	SGRFSCEPAGGLTSLTEPPKGPGFGVQAGL	-				File4189 Spectrum5117 scans: 8223
211	1	GALT2_HUMAN	Polypeptide N-acetylgalactosaminyltransferase 2 OS=Homo sapiens GN=GALNT2 PE=1 SV=1	23	65433	2	1	2	1	1618	3	0	1	504.292	1006.57	2	1006.56	0.0069	1	3.84	1.8	K	KLSCKPFK	W				File4189 Spectrum1035 scans: 3129
211	1	GALT2_HUMAN	Polypeptide N-acetylgalactosaminyltransferase 2 OS=Homo sapiens GN=GALNT2 PE=1 SV=1	23	65433	2	1	2	1	4621	1	1	1	935.432	1868.85	2	1868.85	-0.0024	0	23.09	0.022	R	WPDFNQEAYVGGTMVR	S				File4189 Spectrum4947 scans: 8030
212	1	TCPD_HUMAN	T-complex protein 1 subunit delta OS=Homo sapiens GN=CCT4 PE=1 SV=4	23	58401	1	1	1	1	3196	1	1	1	686.893	1371.77	2	1371.77	0	1	22.75	0.031	R	SILKIDDVVNTR	-				File4189 Spectrum3258 scans: 6020
213	1	CAN1_HUMAN	Calpain-1 catalytic subunit OS=Homo sapiens GN=CAPN1 PE=1 SV=1	23	82465	1	1	1	1	3822	1	1	1	806.402	1610.79	2	1610.79	0.0015	0	22.61	0.0076	R	NYPATFWVNPQFK	I				File4189 Spectrum5341 scans: 8474
214	1	RS3A_HUMAN	40S ribosomal protein S3a OS=Homo sapiens GN=RPS3A PE=1 SV=2	22	30154	2	1	2	1	1059	1	1	1	456.211	910.407	2	910.407	-0.0002	0	9.03	0.43	K	MMEIMTR	E				File4189 Spectrum2301 scans: 4757
214	1	RS3A_HUMAN	40S ribosomal protein S3a OS=Homo sapiens GN=RPS3A PE=1 SV=2	22	30154	2	1	2	1	5134	1	1	1	694.028	2079.06	3	2079.06	-0.0029	1	22.26	0.0082	R	VFEVSLADLQNDEVAFRK	F				File4189 Spectrum5613 scans: 8777
215	1	SPIT2_HUMAN	Kunitz-type protease inhibitor 2 OS=Homo sapiens GN=SPINT2 PE=1 SV=2	22	28951	1	1	1	1	2433	1	1	1	586.289	1170.56	2	1170.56	-0.0002	0	22.04	0.0086	R	NAADSSVPSAPR	R				File4189 Spectrum584 scans: 2575
216	1	JAK1_HUMAN	Tyrosine-protein kinase JAK1 OS=Homo sapiens GN=JAK1 PE=1 SV=2	21	135016	2	1	2	1	4089	1	1	1	855.46	1708.91	2	1708.9	0.0019	0	21.02	0.011	R	TSFQNLIEGFEALLK	-				File4189 Spectrum9422 scans: 13403
216	1	JAK1_HUMAN	Tyrosine-protein kinase JAK1 OS=Homo sapiens GN=JAK1 PE=1 SV=2	21	135016	2	1	2	1	4170	2	0	1	870.474	1738.93	2	1738.93	0.0086	2	2.64	2.2	K	DISYKRYIPETLNK	S				File4189 Spectrum3086 scans: 5794
217	1	PCDG7_HUMAN	Protocadherin gamma-A7 OS=Homo sapiens GN=PCDHGA7 PE=2 SV=1	21	102001	1	1	1	1	3979	1	1	1	835.939	1669.86	2	1669.85	0.0094	0	20.57	0.012	R	VHHLVLTASDGGDPPR	S				File4189 Spectrum7606 scans: 11063
218	1	CLH1_HUMAN	Clathrin heavy chain 1 OS=Homo sapiens GN=CLTC PE=1 SV=5	21	193260	2	1	2	1	3424	1	1	1	730.352	1458.69	2	1458.69	-0.0002	1	20.54	0.012	R	FLRENPYYDSR	V				File4189 Spectrum1774 scans: 4059
218	1	CLH1_HUMAN	Clathrin heavy chain 1 OS=Homo sapiens GN=CLTC PE=1 SV=5	21	193260	2	1	2	1	7945	1	1	1	1099.58	3295.71	3	3295.71	-0.0011	0	1.58	0.71	K	GQVLSVCVEEENIIPYITNVLQNPDLALR	M				File4189 Spectrum8879 scans: 12578
219	1	RM12_HUMAN	39S ribosomal protein L12, mitochondrial OS=Homo sapiens GN=MRPL12 PE=1 SV=2	20	21563	2	1	1	1	7123	1	1	1	946.546	2836.62	3	2836.62	-0.0002	1	20.45	0.009	K	IQQLVQDIASLTLLEISDLNELLKK	T				File4189 Spectrum10701 scans: 15753
219	1	RM12_HUMAN	39S ribosomal protein L12, mitochondrial OS=Homo sapiens GN=MRPL12 PE=1 SV=2	20	21563	2	1	1	1	7124	1	1	1	946.548	2836.62	3	2836.62	0.0051	1	11.96	0.064	K	IQQLVQDIASLTLLEISDLNELLKK	T				File4189 Spectrum10719 scans: 15801
220	1	HSDL2_HUMAN	Hydroxysteroid dehydrogenase-like protein 2 OS=Homo sapiens GN=HSDL2 PE=1 SV=1	20	45651	2	2	2	2	1554	1	1	1	498.243	994.471	2	994.472	-0.0006	0	15.39	0.036	R	SGAVEETFR	I				File4189 Spectrum1142 scans: 3268
220	1	HSDL2_HUMAN	Hydroxysteroid dehydrogenase-like protein 2 OS=Homo sapiens GN=HSDL2 PE=1 SV=1	20	45651	2	2	2	2	4494	1	1	1	917.994	1833.97	2	1833.97	0.0011	0	18.16	0.02	K	LLGTIYTAAEEIEAVGGK	A				File4189 Spectrum6441 scans: 9729
221	1	CTDP1_HUMAN	RNA polymerase II subunit A C-terminal domain phosphatase OS=Homo sapiens GN=CTDP1 PE=1 SV=3	20	105304	1	1	1	1	5004	1	1	1	1012.51	2023.01	2	2023	0.0108	2	19.95	0.013	K	YDRYLNKEIEEAPDIR	K				File4189 Spectrum1373 scans: 3554
222	1	LAMB3_HUMAN	Laminin subunit beta-3 OS=Homo sapiens GN=LAMB3 PE=1 SV=1	19	133366	1	1	1	1	6433	1	1	1	845.422	2533.24	3	2533.24	0.0065	1	19.47	0.015	R	AAEESASQIQSSAQRLETQVSASR	S				File4189 Spectrum3492 scans: 6312
223	1	SLUR1_HUMAN	Secreted Ly-6/uPAR-related protein 1 OS=Homo sapiens GN=SLURP1 PE=1 SV=2	19	11805	4	1	2	1	1763	3	0	1	519.721	1037.43	2	1037.43	0	0	6.78	0.34	K	EPMTSASCR	T				File4189 Spectrum659 scans: 2672
223	1	SLUR1_HUMAN	Secreted Ly-6/uPAR-related protein 1 OS=Homo sapiens GN=SLURP1 PE=1 SV=2	19	11805	4	1	2	1	1765	3	0	1	519.721	1037.43	2	1037.43	0.0003	0	6.5	0.37	K	EPMTSASCR	T				File4189 Spectrum771 scans: 2813
223	1	SLUR1_HUMAN	Secreted Ly-6/uPAR-related protein 1 OS=Homo sapiens GN=SLURP1 PE=1 SV=2	19	11805	4	1	2	1	1767	3	0	1	519.721	1037.43	2	1037.43	0.0006	0	6.79	0.34	K	EPMTSASCR	T				File4189 Spectrum715 scans: 2743
223	1	SLUR1_HUMAN	Secreted Ly-6/uPAR-related protein 1 OS=Homo sapiens GN=SLURP1 PE=1 SV=2	19	11805	4	1	2	1	7078	1	1	1	940.075	2817.2	3	2817.2	0.0064	0	19.39	0.013	R	SCSSSCVATDPDSIGAAHLIFCCFR	D				File4189 Spectrum5796 scans: 8986
224	1	CATC_HUMAN	Dipeptidyl peptidase 1 OS=Homo sapiens GN=CTSC PE=1 SV=2	19	52619	1	1	1	1	8340	1	1	1	1186.24	3555.7	3	3555.7	-0.0006	0	18.8	0.017	R	DPFNPFELTNHAVLLVGYGTDSASGMDYWIVK	N				File4189 Spectrum8341 scans: 11913
225	1	SC22B_HUMAN	Vesicle-trafficking protein SEC22b OS=Homo sapiens GN=SEC22B PE=1 SV=4	18	24806	2	1	2	1	1092	1	1	1	458.786	915.558	2	915.558	0.0002	0	12.59	0.24	M	VLLTMIAR	V				File4189 Spectrum3794 scans: 6689
225	1	SC22B_HUMAN	Vesicle-trafficking protein SEC22b OS=Homo sapiens GN=SEC22B PE=1 SV=4	18	24806	2	1	2	1	7738	1	1	1	1055.17	3162.49	3	3162.49	0.0051	1	18.43	0.032	R	VADGLPLAASMQEDEQSGRDLQQYQSQAK	Q				File4189 Spectrum3835 scans: 6743
226	1	1A25_HUMAN	HLA class I histocompatibility antigen, A-25 alpha chain OS=Homo sapiens GN=HLA-A PE=2 SV=1	18	41477	1	1	1	1	5297	1	1	1	716.336	2145.99	3	2145.99	0.0005	1	18.05	0.02	R	APWIEQEGPEYWDRNTR	N				File4189 Spectrum3888 scans: 6808
227	1	EPHA2_HUMAN	Ephrin type-A receptor 2 OS=Homo sapiens GN=EPHA2 PE=1 SV=2	18	109679	1	1	1	1	4980	1	1	1	1007.58	2013.15	2	2013.15	-0.0005	1	17.53	0.04	R	IAYSLLGLKDQVNTVGIPI	-				File4189 Spectrum6846 scans: 10183
228	1	MEX3D_HUMAN	RNA-binding protein MEX3D OS=Homo sapiens GN=MEX3D PE=1 SV=3	17	65641	1	1	1	1	659	1	1	1	414.253	826.491	2	826.491	-0.0001	0	17.11	0.052	R	LELPLSR	R				File4189 Spectrum1970 scans: 4324
229	1	TMCO1_HUMAN	Transmembrane and coiled-coil domain-containing protein 1 OS=Homo sapiens GN=TMCO1 PE=1 SV=1	16	21389	1	1	1	1	3641	1	1	1	772.399	1542.78	2	1542.78	-0.0002	1	16.35	0.029	K	QAGGFLGPPPPSGKFS	-				File4189 Spectrum3363 scans: 6149
230	1	STOM_HUMAN	Erythrocyte band 7 integral membrane protein OS=Homo sapiens GN=STOM PE=1 SV=3	16	31882	2	1	2	1	2753	1	1	1	624.306	1246.6	2	1246.6	-0.0004	0	15.78	0.033	K	VIAAEGEMNASR	A				File4189 Spectrum1060 scans: 3160
230	1	STOM_HUMAN	Erythrocyte band 7 integral membrane protein OS=Homo sapiens GN=STOM PE=1 SV=3	16	31882	2	1	2	1	8206	1	1	1	1153.98	3458.91	3	3458.91	-0.002	1	0.88	1.3	R	YLQTLTTIAAEKNSTIVFPLPIDMLQGIIGAK	H				File4189 Spectrum9135 scans: 12955
231	1	THIO_HUMAN	Thioredoxin OS=Homo sapiens GN=TXN PE=1 SV=3	15	12015	1	1	1	1	5302	1	1	1	716.711	2147.11	3	2147.11	-0.0015	2	14.89	0.04	K	VGEFSGANKEKLEATINELV	-				File4189 Spectrum5462 scans: 8609
232	1	AP2A2_HUMAN	AP-2 complex subunit alpha-2 OS=Homo sapiens GN=AP2A2 PE=1 SV=2	14	104807	1	1	1	1	7870	1	1	1	1082.24	3243.69	3	3243.69	0	1	14.39	0.045	R	LSTVASTDILATVLEEMPPFPERESSILAK	L				File4189 Spectrum8295 scans: 11859
233	1	LDHB_HUMAN	L-lactate dehydrogenase B chain OS=Homo sapiens GN=LDHB PE=1 SV=2	14	36900	1	1	1	1	4228	1	1	1	587.641	1759.9	3	1759.9	0.001	2	13.67	0.052	K	SADTLWDIQKDLKDL	-				File4189 Spectrum6484 scans: 9776
234	1	RL21_HUMAN	60S ribosomal protein L21 OS=Homo sapiens GN=RPL21 PE=1 SV=2	13	18610	1	1	1	1	5126	1	1	1	1039.51	2077.01	2	2077.01	0.0009	1	13.14	0.058	R	TNGKEPELLEPIPYEFMA	-				File4189 Spectrum6632 scans: 9936

## Sheet: S13CAL27_ICG001_Mascot_F023039
Supplemental Table 13 - EGFR Peptides from CAL27 cells + ICG-001 (Mascot Search Results)
Header	--------------------------------------------------------
Search title
Timestamp	2019-09-11T21:21:36Z
User
Email
Report URI	http://bumc-arizona.bumc.bu.edu/mascot/cgi/master_results.pl?file=../data/20190911/F023039.dat
Peak list data path	C:\Users\kbc36\KBC\PROTOCOLS\BUMC_247_EGFR_MSonly\20190910_HCDtrigEThcD\20190910_CAL27_ICG001_EGFR_IP_1_10th.mgf
Peak list format	Mascot generic
Search type	MIS
Mascot version	2.4.1
Database	SwissProt
Fasta file	SwissProt_2013_01.fasta
Total sequences	538849
Total residues	191337357
Sequences after taxonomy filter	20233
Number of queries	10490
Fixed modifications	--------------------------------------------------------
Identifier	Name	Delta	Neutral loss
1	Carbamidomethyl (C)	57.0215
Variable modifications	--------------------------------------------------------
Identifier	Name	Delta	Neutral loss(es)
1	Oxidation (M)	15.9949	0	63.9983
Search Parameters	--------------------------------------------------------
Taxonomy filter	. . . . . . . . . . . . . . . . Homo sapiens (human)
Enzyme	Trypsin
Maximum Missed Cleavages	2
Fixed modifications	Carbamidomethyl (C)
Variable modifications	Oxidation (M)
Peptide Mass Tolerance	10
Peptide Mass Tolerance Units	ppm
Fragment Mass Tolerance	0.1
Fragment Mass Tolerance Units	Da
Mass values	Monoisotopic
Instrument type	Default
Format parameters	--------------------------------------------------------
Significance threshold	0.05
Max. number of hits	0
Use MudPIT protein scoring	1
Ions score cut-off	0
Include same-set proteins	0
Include sub-set proteins	1
Include unassigned	0
Require bold red	0
Use homology threshold	1
Group protein families	1
Protein hits	--------------------------------------------------------
prot_hit_num	prot_family_member	prot_acc	prot_desc	prot_score	prot_mass	prot_matches	prot_matches_sig	prot_sequences	prot_sequences_sig	pep_query	pep_rank	pep_isbold	pep_isunique	pep_exp_mz	pep_exp_mr	pep_exp_z	pep_calc_mr	pep_delta	pep_miss	pep_score	pep_expect	pep_res_before	pep_seq	pep_res_after	pep_var_mod	pep_var_mod_pos	pep_summed_mod_pos	pep_scan_title
1	1	EGFR_HUMAN	Epidermal growth factor receptor OS=Homo sapiens GN=EGFR PE=1 SV=2	10682	137612	312	286	99	95	950	1	1	1	419.227	836.439	2	836.439	0.0002	0	19.84	0.1	K	LFGTSGQK	T				File4192 Spectrum597 scans: 2629
1	1	EGFR_HUMAN	Epidermal growth factor receptor OS=Homo sapiens GN=EGFR PE=1 SV=2	10682	137612	312	286	99	95	1174	1	1	1	432.745	863.475	2	863.475	-0.0001	0	51.36	5.4e-05	K	ITDFGLAK	L				File4192 Spectrum2190 scans: 4699
1	1	EGFR_HUMAN	Epidermal growth factor receptor OS=Homo sapiens GN=EGFR PE=1 SV=2	10682	137612	312	286	99	95	1175	1	1	1	432.745	863.476	2	863.475	0.001	0	51.47	5.2e-05	K	ITDFGLAK	L				File4192 Spectrum2237 scans: 4763
1	1	EGFR_HUMAN	Epidermal growth factor receptor OS=Homo sapiens GN=EGFR PE=1 SV=2	10682	137612	312	286	99	95	2077	1	1	1	489.779	977.543	2	977.543	0	0	45.66	0.00015	R	ELIIEFSK	M				File4192 Spectrum3581 scans: 6502
1	1	EGFR_HUMAN	Epidermal growth factor receptor OS=Homo sapiens GN=EGFR PE=1 SV=2	10682	137612	312	286	99	95	2231	1	1	1	499.224	996.433	2	996.433	0	0	42.52	0.00017	K	GMNYLEDR	R				File4192 Spectrum1654 scans: 3991
1	1	EGFR_HUMAN	Epidermal growth factor receptor OS=Homo sapiens GN=EGFR PE=1 SV=2	10682	137612	312	286	99	95	2232	1	1	1	499.224	996.434	2	996.433	0.0002	0	42.51	0.00017	K	GMNYLEDR	R				File4192 Spectrum1607 scans: 3929
1	1	EGFR_HUMAN	Epidermal growth factor receptor OS=Homo sapiens GN=EGFR PE=1 SV=2	10682	137612	312	286	99	95	2233	1	1	1	499.224	996.434	2	996.433	0.0004	0	33.96	0.0012	K	GMNYLEDR	R				File4192 Spectrum1696 scans: 4054
1	1	EGFR_HUMAN	Epidermal growth factor receptor OS=Homo sapiens GN=EGFR PE=1 SV=2	10682	137612	312	286	99	95	2249	1	1	1	500.261	998.507	2	998.507	0.0001	0	38.43	0.00025	R	NYDLSFLK	T				File4192 Spectrum3922 scans: 6911
1	1	EGFR_HUMAN	Epidermal growth factor receptor OS=Homo sapiens GN=EGFR PE=1 SV=2	10682	137612	312	286	99	95	2289	1	1	1	504.292	1006.57	2	1006.57	0	1	30.17	0.0046	R	ILKETEFK	K				File4192 Spectrum825 scans: 2920
1	1	EGFR_HUMAN	Epidermal growth factor receptor OS=Homo sapiens GN=EGFR PE=1 SV=2	10682	137612	312	286	99	95	2427	1	1	1	514.774	1027.53	2	1027.53	0	0	15.71	0.034	K	GLWIPEGEK	V				File4192 Spectrum3063 scans: 5845
1	1	EGFR_HUMAN	Epidermal growth factor receptor OS=Homo sapiens GN=EGFR PE=1 SV=2	10682	137612	312	286	99	95	2454	1	1	1	516.744	1031.47	2	1031.47	-0.0005	0	3.55	2	K	YSFGATCVK	K				File4192 Spectrum1934 scans: 4363
1	1	EGFR_HUMAN	Epidermal growth factor receptor OS=Homo sapiens GN=EGFR PE=1 SV=2	10682	137612	312	286	99	95	2455	1	1	1	516.745	1031.47	2	1031.47	-0.0003	0	28.93	0.0057	K	YSFGATCVK	K				File4192 Spectrum1760 scans: 4138
1	1	EGFR_HUMAN	Epidermal growth factor receptor OS=Homo sapiens GN=EGFR PE=1 SV=2	10682	137612	312	286	99	95	2456	1	1	1	516.745	1031.47	2	1031.47	-0.0002	0	10.8	0.36	K	YSFGATCVK	K				File4192 Spectrum1862 scans: 4273
1	1	EGFR_HUMAN	Epidermal growth factor receptor OS=Homo sapiens GN=EGFR PE=1 SV=2	10682	137612	312	286	99	95	2457	1	1	1	516.745	1031.47	2	1031.47	-0.0002	0	50.97	3.5e-05	K	YSFGATCVK	K				File4192 Spectrum1667 scans: 4012
1	1	EGFR_HUMAN	Epidermal growth factor receptor OS=Homo sapiens GN=EGFR PE=1 SV=2	10682	137612	312	286	99	95	2458	1	1	1	516.745	1031.48	2	1031.47	0.0009	0	51.1	3.5e-05	K	YSFGATCVK	K				File4192 Spectrum1713 scans: 4078
1	1	EGFR_HUMAN	Epidermal growth factor receptor OS=Homo sapiens GN=EGFR PE=1 SV=2	10682	137612	312	286	99	95	2473	1	1	1	519.721	1037.43	2	1037.43	-0.0003	0	71.83	1.1e-07	R	ESDCLVCR	K				File4192 Spectrum505 scans: 2493
1	1	EGFR_HUMAN	Epidermal growth factor receptor OS=Homo sapiens GN=EGFR PE=1 SV=2	10682	137612	312	286	99	95	2474	1	1	1	519.721	1037.43	2	1037.43	0	0	50.18	1.5e-05	R	ESDCLVCR	K				File4192 Spectrum452 scans: 2408
1	1	EGFR_HUMAN	Epidermal growth factor receptor OS=Homo sapiens GN=EGFR PE=1 SV=2	10682	137612	312	286	99	95	2475	1	1	1	519.721	1037.43	2	1037.43	0	0	71.48	1.1e-07	R	ESDCLVCR	K				File4192 Spectrum589 scans: 2615
1	1	EGFR_HUMAN	Epidermal growth factor receptor OS=Homo sapiens GN=EGFR PE=1 SV=2	10682	137612	312	286	99	95	2476	1	1	1	519.721	1037.43	2	1037.43	0.0001	0	31.31	0.0012	R	ESDCLVCR	K				File4192 Spectrum717 scans: 2782
1	1	EGFR_HUMAN	Epidermal growth factor receptor OS=Homo sapiens GN=EGFR PE=1 SV=2	10682	137612	312	286	99	95	2477	1	1	1	519.721	1037.43	2	1037.43	0.0001	0	71.89	1e-07	R	ESDCLVCR	K				File4192 Spectrum542 scans: 2551
1	1	EGFR_HUMAN	Epidermal growth factor receptor OS=Homo sapiens GN=EGFR PE=1 SV=2	10682	137612	312	286	99	95	2478	1	1	1	519.721	1037.43	2	1037.43	0.0002	0	47.35	3e-05	R	ESDCLVCR	K				File4192 Spectrum635 scans: 2680
1	1	EGFR_HUMAN	Epidermal growth factor receptor OS=Homo sapiens GN=EGFR PE=1 SV=2	10682	137612	312	286	99	95	2740	1	1	1	544.264	1086.51	2	1086.51	0	0	24.95	0.014	K	CNLLEGEPR	E				File4192 Spectrum1700 scans: 4060
1	1	EGFR_HUMAN	Epidermal growth factor receptor OS=Homo sapiens GN=EGFR PE=1 SV=2	10682	137612	312	286	99	95	2741	1	1	1	544.264	1086.51	2	1086.51	0.0003	0	44.86	0.00014	K	CNLLEGEPR	E				File4192 Spectrum1656 scans: 3994
1	1	EGFR_HUMAN	Epidermal growth factor receptor OS=Homo sapiens GN=EGFR PE=1 SV=2	10682	137612	312	286	99	95	2762	1	1	1	546.788	1091.56	2	1091.56	0	0	59.12	1.3e-05	R	YLVIQGDER	M				File4192 Spectrum1744 scans: 4118
1	1	EGFR_HUMAN	Epidermal growth factor receptor OS=Homo sapiens GN=EGFR PE=1 SV=2	10682	137612	312	286	99	95	2763	1	1	1	546.788	1091.56	2	1091.56	0.0003	0	58.9	1.4e-05	R	YLVIQGDER	M				File4192 Spectrum1787 scans: 4172
1	1	EGFR_HUMAN	Epidermal growth factor receptor OS=Homo sapiens GN=EGFR PE=1 SV=2	10682	137612	312	286	99	95	2852	1	1	1	553.28	1104.55	2	1104.55	0.001	0	24.57	0.04	R	VAPQSSEFIGA	-				File4192 Spectrum2626 scans: 5250
1	1	EGFR_HUMAN	Epidermal growth factor receptor OS=Homo sapiens GN=EGFR PE=1 SV=2	10682	137612	312	286	99	95	2853	1	1	1	553.28	1104.55	2	1104.55	0.0014	0	24.16	0.043	R	VAPQSSEFIGA	-				File4192 Spectrum2492 scans: 5091
1	1	EGFR_HUMAN	Epidermal growth factor receptor OS=Homo sapiens GN=EGFR PE=1 SV=2	10682	137612	312	286	99	95	2854	1	1	1	553.281	1104.55	2	1104.55	0.0015	0	24.37	0.041	R	VAPQSSEFIGA	-				File4192 Spectrum2556 scans: 5169
1	1	EGFR_HUMAN	Epidermal growth factor receptor OS=Homo sapiens GN=EGFR PE=1 SV=2	10682	137612	312	286	99	95	3016	1	1	1	568.34	1134.66	2	1134.66	-0.0002	2	31.83	0.0014	R	ILKETEFKK	I				File4192 Spectrum385 scans: 2303
1	1	EGFR_HUMAN	Epidermal growth factor receptor OS=Homo sapiens GN=EGFR PE=1 SV=2	10682	137612	312	286	99	95	3017	1	1	1	379.229	1134.66	3	1134.66	0.0002	2	38.75	0.00041	R	ILKETEFKK	I				File4192 Spectrum378 scans: 2294
1	1	EGFR_HUMAN	Epidermal growth factor receptor OS=Homo sapiens GN=EGFR PE=1 SV=2	10682	137612	312	286	99	95	3120	1	1	1	577.275	1152.53	2	1152.53	0.0002	1	35.65	0.00064	K	GMNYLEDRR	L				File4192 Spectrum1013 scans: 3166
1	1	EGFR_HUMAN	Epidermal growth factor receptor OS=Homo sapiens GN=EGFR PE=1 SV=2	10682	137612	312	286	99	95	3121	1	1	1	577.275	1152.53	2	1152.53	0.0003	1	25.5	0.0041	K	GMNYLEDRR	L				File4192 Spectrum1063 scans: 3233
1	1	EGFR_HUMAN	Epidermal growth factor receptor OS=Homo sapiens GN=EGFR PE=1 SV=2	10682	137612	312	286	99	95	3122	1	1	1	385.186	1152.54	3	1152.53	0.0012	1	23.81	0.0058	K	GMNYLEDRR	L				File4192 Spectrum1014 scans: 3167
1	1	EGFR_HUMAN	Epidermal growth factor receptor OS=Homo sapiens GN=EGFR PE=1 SV=2	10682	137612	312	286	99	95	3123	1	1	1	385.186	1152.54	3	1152.53	0.0013	1	31.06	0.0012	K	GMNYLEDRR	L				File4192 Spectrum1062 scans: 3232
1	1	EGFR_HUMAN	Epidermal growth factor receptor OS=Homo sapiens GN=EGFR PE=1 SV=2	10682	137612	312	286	99	95	3152	1	1	1	580.792	1159.57	2	1159.57	-0.0004	1	50.76	5.9e-05	K	YSFGATCVKK	C				File4192 Spectrum947 scans: 3083
1	1	EGFR_HUMAN	Epidermal growth factor receptor OS=Homo sapiens GN=EGFR PE=1 SV=2	10682	137612	312	286	99	95	3153	1	1	1	580.792	1159.57	2	1159.57	0.0001	1	53.91	8.8e-06	K	YSFGATCVKK	C				File4192 Spectrum1004 scans: 3155
1	1	EGFR_HUMAN	Epidermal growth factor receptor OS=Homo sapiens GN=EGFR PE=1 SV=2	10682	137612	312	286	99	95	3192	1	1	1	389.514	1165.52	3	1165.52	-0.0008	1	26.73	0.011	R	ESDCLVCRK	F				File4192 Spectrum208 scans: 2063
1	1	EGFR_HUMAN	Epidermal growth factor receptor OS=Homo sapiens GN=EGFR PE=1 SV=2	10682	137612	312	286	99	95	3193	1	1	1	583.768	1165.52	2	1165.52	-0.0005	1	31.77	0.0033	R	ESDCLVCRK	F				File4192 Spectrum209 scans: 2064
1	1	EGFR_HUMAN	Epidermal growth factor receptor OS=Homo sapiens GN=EGFR PE=1 SV=2	10682	137612	312	286	99	95	3321	1	1	1	596.782	1191.55	2	1191.55	0.0001	0	56.37	1.5e-05	K	IICAQQCSGR	C				File4192 Spectrum189 scans: 2038
1	1	EGFR_HUMAN	Epidermal growth factor receptor OS=Homo sapiens GN=EGFR PE=1 SV=2	10682	137612	312	286	99	95	3322	1	1	1	596.782	1191.55	2	1191.55	0.0003	0	50.41	3.9e-05	K	IICAQQCSGR	C				File4192 Spectrum426 scans: 2364
1	1	EGFR_HUMAN	Epidermal growth factor receptor OS=Homo sapiens GN=EGFR PE=1 SV=2	10682	137612	312	286	99	95	3323	1	1	1	596.782	1191.55	2	1191.55	0.0003	0	68.68	8.9e-07	K	IICAQQCSGR	C				File4192 Spectrum229 scans: 2090
1	1	EGFR_HUMAN	Epidermal growth factor receptor OS=Homo sapiens GN=EGFR PE=1 SV=2	10682	137612	312	286	99	95	3324	1	1	1	596.782	1191.55	2	1191.55	0.0004	0	40.95	0.00014	K	IICAQQCSGR	C				File4192 Spectrum278 scans: 2154
1	1	EGFR_HUMAN	Epidermal growth factor receptor OS=Homo sapiens GN=EGFR PE=1 SV=2	10682	137612	312	286	99	95	3329	1	1	1	398.899	1193.68	3	1193.68	-0.0003	2	10.7	0.099	K	KLFGTSGQKTK	I				File4192 Spectrum123 scans: 1956
1	1	EGFR_HUMAN	Epidermal growth factor receptor OS=Homo sapiens GN=EGFR PE=1 SV=2	10682	137612	312	286	99	95	3350	1	1	0	599.827	1197.64	2	1197.64	-0.0001	0	73.21	4.6e-07	K	VLGSGAFGTVYK	G				File4192 Spectrum2969 scans: 5724
1	1	EGFR_HUMAN	Epidermal growth factor receptor OS=Homo sapiens GN=EGFR PE=1 SV=2	10682	137612	312	286	99	95	3351	1	1	0	599.827	1197.64	2	1197.64	0	0	64.04	3.1e-06	K	VLGSGAFGTVYK	G				File4192 Spectrum2919 scans: 5658
1	1	EGFR_HUMAN	Epidermal growth factor receptor OS=Homo sapiens GN=EGFR PE=1 SV=2	10682	137612	312	286	99	95	3409	1	1	1	604.872	1207.73	2	1207.73	0.0002	0	64.22	7.2e-07	R	IPLENLQIIR	G				File4192 Spectrum4251 scans: 7305
1	1	EGFR_HUMAN	Epidermal growth factor receptor OS=Homo sapiens GN=EGFR PE=1 SV=2	10682	137612	312	286	99	95	3574	1	1	1	417.238	1248.69	3	1248.69	-0.0002	0	38	0.0013	R	NLQEILHGAVR	F				File4192 Spectrum3253 scans: 6088
1	1	EGFR_HUMAN	Epidermal growth factor receptor OS=Homo sapiens GN=EGFR PE=1 SV=2	10682	137612	312	286	99	95	3575	1	1	1	417.238	1248.69	3	1248.69	-0.0001	0	35.31	0.0024	R	NLQEILHGAVR	F				File4192 Spectrum3206 scans: 6029
1	1	EGFR_HUMAN	Epidermal growth factor receptor OS=Homo sapiens GN=EGFR PE=1 SV=2	10682	137612	312	286	99	95	3576	1	1	1	625.355	1248.69	2	1248.69	0.0006	0	54.66	2.8e-05	R	NLQEILHGAVR	F				File4192 Spectrum3223 scans: 6051
1	1	EGFR_HUMAN	Epidermal growth factor receptor OS=Homo sapiens GN=EGFR PE=1 SV=2	10682	137612	312	286	99	95	3646	1	1	1	631.883	1261.75	2	1261.75	-0.0002	1	54.14	1.1e-05	R	NVLVKTPQHVK	I				File4192 Spectrum355 scans: 2266
1	1	EGFR_HUMAN	Epidermal growth factor receptor OS=Homo sapiens GN=EGFR PE=1 SV=2	10682	137612	312	286	99	95	3687	1	1	1	426.547	1276.62	3	1276.62	-0.0011	1	5.34	0.32	K	IISNRGENSCK	A				File4192 Spectrum2 scans: 1767
1	1	EGFR_HUMAN	Epidermal growth factor receptor OS=Homo sapiens GN=EGFR PE=1 SV=2	10682	137612	312	286	99	95	3704	1	1	1	641.364	1280.71	2	1280.71	-0.0003	1	25.81	0.0038	K	FRELIIEFSK	M				File4192 Spectrum3858 scans: 6835
1	1	EGFR_HUMAN	Epidermal growth factor receptor OS=Homo sapiens GN=EGFR PE=1 SV=2	10682	137612	312	286	99	95	3926	1	1	1	673.844	1345.67	2	1345.67	0.0007	0	88.13	2e-08	K	EISDGDVIISGNK	N				File4192 Spectrum1858 scans: 4268
1	1	EGFR_HUMAN	Epidermal growth factor receptor OS=Homo sapiens GN=EGFR PE=1 SV=2	10682	137612	312	286	99	95	4007	1	1	0	689.816	1377.62	2	1377.62	-0.0004	0	25.76	0.012	K	CWMIDADSRPK	F				File4192 Spectrum2197 scans: 4707
1	1	EGFR_HUMAN	Epidermal growth factor receptor OS=Homo sapiens GN=EGFR PE=1 SV=2	10682	137612	312	286	99	95	4053	1	1	1	698.837	1395.66	2	1395.66	-0.0002	0	61.86	1.6e-06	K	NLCYANTINWK	K				File4192 Spectrum3271 scans: 6112
1	1	EGFR_HUMAN	Epidermal growth factor receptor OS=Homo sapiens GN=EGFR PE=1 SV=2	10682	137612	312	286	99	95	4054	1	1	1	698.838	1395.66	2	1395.66	0.0006	0	46.32	4.5e-05	K	NLCYANTINWK	K				File4192 Spectrum3315 scans: 6163
1	1	EGFR_HUMAN	Epidermal growth factor receptor OS=Homo sapiens GN=EGFR PE=1 SV=2	10682	137612	312	286	99	95	4095	1	1	1	703.827	1405.64	2	1405.64	-0.0004	0	33.37	0.0021	R	NYVVTDHGSCVR	A				File4192 Spectrum959 scans: 3099
1	1	EGFR_HUMAN	Epidermal growth factor receptor OS=Homo sapiens GN=EGFR PE=1 SV=2	10682	137612	312	286	99	95	4096	1	1	1	703.828	1405.64	2	1405.64	-0.0003	0	52.6	2.6e-05	R	NYVVTDHGSCVR	A				File4192 Spectrum529 scans: 2532
1	1	EGFR_HUMAN	Epidermal growth factor receptor OS=Homo sapiens GN=EGFR PE=1 SV=2	10682	137612	312	286	99	95	4097	1	1	1	469.554	1405.64	3	1405.64	-0.0002	0	27.23	0.0092	R	NYVVTDHGSCVR	A				File4192 Spectrum486 scans: 2468
1	1	EGFR_HUMAN	Epidermal growth factor receptor OS=Homo sapiens GN=EGFR PE=1 SV=2	10682	137612	312	286	99	95	4098	1	1	1	703.828	1405.64	2	1405.64	0.0006	0	47.62	8.6e-05	R	NYVVTDHGSCVR	A				File4192 Spectrum489 scans: 2472
1	1	EGFR_HUMAN	Epidermal growth factor receptor OS=Homo sapiens GN=EGFR PE=1 SV=2	10682	137612	312	286	99	95	4099	1	1	1	469.555	1405.64	3	1405.64	0.0017	0	26.3	0.0034	R	NYVVTDHGSCVR	A				File4192 Spectrum527 scans: 2529
1	1	EGFR_HUMAN	Epidermal growth factor receptor OS=Homo sapiens GN=EGFR PE=1 SV=2	10682	137612	312	286	99	95	4211	1	1	1	720.416	1438.82	2	1438.82	-0.0003	1	71.76	3e-07	K	IKVLGSGAFGTVYK	G				File4192 Spectrum3135 scans: 5940
1	1	EGFR_HUMAN	Epidermal growth factor receptor OS=Homo sapiens GN=EGFR PE=1 SV=2	10682	137612	312	286	99	95	4212	1	1	1	480.613	1438.82	3	1438.82	0	1	59.35	5.2e-06	K	IKVLGSGAFGTVYK	G				File4192 Spectrum3134 scans: 5939
1	1	EGFR_HUMAN	Epidermal growth factor receptor OS=Homo sapiens GN=EGFR PE=1 SV=2	10682	137612	312	286	99	95	4475	1	1	1	767.895	1533.78	2	1533.78	-0.0004	1	68.19	6.4e-07	K	LTKIICAQQCSGR	C				File4192 Spectrum663 scans: 2716
1	1	EGFR_HUMAN	Epidermal growth factor receptor OS=Homo sapiens GN=EGFR PE=1 SV=2	10682	137612	312	286	99	95	4476	1	1	1	512.266	1533.78	3	1533.78	0.0004	1	37.63	0.0003	K	LTKIICAQQCSGR	C				File4192 Spectrum665 scans: 2719
1	1	EGFR_HUMAN	Epidermal growth factor receptor OS=Homo sapiens GN=EGFR PE=1 SV=2	10682	137612	312	286	99	95	4532	1	1	1	518.96	1553.86	3	1553.86	0.0002	1	70.4	2.5e-07	K	TPQHVKITDFGLAK	L				File4192 Spectrum2302 scans: 4846
1	1	EGFR_HUMAN	Epidermal growth factor receptor OS=Homo sapiens GN=EGFR PE=1 SV=2	10682	137612	312	286	99	95	4568	1	1	1	782.864	1563.71	2	1563.71	-0.0002	0	57.29	4.2e-06	R	MHLPSPTDSNFYR	A				File4192 Spectrum3052 scans: 5832
1	1	EGFR_HUMAN	Epidermal growth factor receptor OS=Homo sapiens GN=EGFR PE=1 SV=2	10682	137612	312	286	99	95	4569	1	1	1	522.245	1563.71	3	1563.71	-0.0001	0	23.17	0.0067	R	MHLPSPTDSNFYR	A				File4192 Spectrum2939 scans: 5685
1	1	EGFR_HUMAN	Epidermal growth factor receptor OS=Homo sapiens GN=EGFR PE=1 SV=2	10682	137612	312	286	99	95	4570	1	1	1	522.245	1563.71	3	1563.71	0.0001	0	39.79	0.00019	R	MHLPSPTDSNFYR	A				File4192 Spectrum2992 scans: 5755
1	1	EGFR_HUMAN	Epidermal growth factor receptor OS=Homo sapiens GN=EGFR PE=1 SV=2	10682	137612	312	286	99	95	4571	1	1	1	522.245	1563.71	3	1563.71	0.0002	0	28.69	0.002	R	MHLPSPTDSNFYR	A				File4192 Spectrum3087 scans: 5873
1	1	EGFR_HUMAN	Epidermal growth factor receptor OS=Homo sapiens GN=EGFR PE=1 SV=2	10682	137612	312	286	99	95	4572	1	1	1	522.245	1563.71	3	1563.71	0.0002	0	40.5	0.00016	R	MHLPSPTDSNFYR	A				File4192 Spectrum3039 scans: 5817
1	1	EGFR_HUMAN	Epidermal growth factor receptor OS=Homo sapiens GN=EGFR PE=1 SV=2	10682	137612	312	286	99	95	4573	1	1	1	782.865	1563.71	2	1563.71	0.0004	0	59.22	5.9e-06	R	MHLPSPTDSNFYR	A				File4192 Spectrum2999 scans: 5767
1	1	EGFR_HUMAN	Epidermal growth factor receptor OS=Homo sapiens GN=EGFR PE=1 SV=2	10682	137612	312	286	99	95	4602	1	1	1	524.279	1569.82	3	1569.82	0.0004	0	56.4	2.5e-05	R	TDLHAFENLEIIR	G				File4192 Spectrum4437 scans: 7520
1	1	EGFR_HUMAN	Epidermal growth factor receptor OS=Homo sapiens GN=EGFR PE=1 SV=2	10682	137612	312	286	99	95	4603	1	1	1	785.916	1569.82	2	1569.82	0.0018	0	64.67	3.5e-06	R	TDLHAFENLEIIR	G				File4192 Spectrum4445 scans: 7529
1	1	EGFR_HUMAN	Epidermal growth factor receptor OS=Homo sapiens GN=EGFR PE=1 SV=2	10682	137612	312	286	99	95	4607	1	1	1	525.259	1572.75	3	1572.75	0.0001	2	35.26	0.0022	K	YSFGATCVKKCPR	N				File4192 Spectrum759 scans: 2835
1	1	EGFR_HUMAN	Epidermal growth factor receptor OS=Homo sapiens GN=EGFR PE=1 SV=2	10682	137612	312	286	99	95	4625	1	1	1	790.862	1579.71	2	1579.71	0.0006	0	19.21	0.053	R	MHLPSPTDSNFYR	A	Oxidation (M)	0.1000000000000.0		File4192 Spectrum2182 scans: 4688
1	1	EGFR_HUMAN	Epidermal growth factor receptor OS=Homo sapiens GN=EGFR PE=1 SV=2	10682	137612	312	286	99	95	4647	1	1	1	794.908	1587.8	2	1587.8	0.0006	1	23.79	0.0059	R	DPQRYLVIQGDER	M				File4192 Spectrum2140 scans: 4631
1	1	EGFR_HUMAN	Epidermal growth factor receptor OS=Homo sapiens GN=EGFR PE=1 SV=2	10682	137612	312	286	99	95	4884	1	1	1	837.948	1673.88	2	1673.88	-0.0016	1	70.14	6.2e-07	R	SLKEISDGDVIISGNK	N				File4192 Spectrum2385 scans: 4951
1	1	EGFR_HUMAN	Epidermal growth factor receptor OS=Homo sapiens GN=EGFR PE=1 SV=2	10682	137612	312	286	99	95	4911	1	1	1	844.829	1687.64	2	1687.65	-0.0022	0	9.62	0.11	R	ACGADSYEMEEDGVR	K				File4192 Spectrum1577 scans: 3890
1	1	EGFR_HUMAN	Epidermal growth factor receptor OS=Homo sapiens GN=EGFR PE=1 SV=2	10682	137612	312	286	99	95	4912	1	1	1	844.83	1687.64	2	1687.65	-0.0008	0	66.3	2.3e-07	R	ACGADSYEMEEDGVR	K				File4192 Spectrum1523 scans: 3818
1	1	EGFR_HUMAN	Epidermal growth factor receptor OS=Homo sapiens GN=EGFR PE=1 SV=2	10682	137612	312	286	99	95	4913	1	1	1	844.83	1687.64	2	1687.65	-0.0006	0	82.99	5e-09	R	ACGADSYEMEEDGVR	K				File4192 Spectrum1412 scans: 3683
1	1	EGFR_HUMAN	Epidermal growth factor receptor OS=Homo sapiens GN=EGFR PE=1 SV=2	10682	137612	312	286	99	95	4914	1	1	1	844.83	1687.65	2	1687.65	0.0001	0	85.78	2.6e-09	R	ACGADSYEMEEDGVR	K				File4192 Spectrum1287 scans: 3518
1	1	EGFR_HUMAN	Epidermal growth factor receptor OS=Homo sapiens GN=EGFR PE=1 SV=2	10682	137612	312	286	99	95	4915	1	1	1	844.83	1687.65	2	1687.65	0.0002	0	86.6	2.2e-09	R	ACGADSYEMEEDGVR	K				File4192 Spectrum1466 scans: 3746
1	1	EGFR_HUMAN	Epidermal growth factor receptor OS=Homo sapiens GN=EGFR PE=1 SV=2	10682	137612	312	286	99	95	4916	1	1	1	844.83	1687.65	2	1687.65	0.0007	0	75.69	2.7e-08	R	ACGADSYEMEEDGVR	K				File4192 Spectrum1337 scans: 3587
1	1	EGFR_HUMAN	Epidermal growth factor receptor OS=Homo sapiens GN=EGFR PE=1 SV=2	10682	137612	312	286	99	95	4961	1	1	1	852.826	1703.64	2	1703.64	-0.002	0	81.62	6.9e-09	R	ACGADSYEMEEDGVR	K	Oxidation (M)	0.000000001000000.0		File4192 Spectrum790 scans: 2876
1	1	EGFR_HUMAN	Epidermal growth factor receptor OS=Homo sapiens GN=EGFR PE=1 SV=2	10682	137612	312	286	99	95	5001	1	1	1	859.895	1717.78	2	1717.78	-0.001	1	60.07	2.3e-06	R	ECVDKCNLLEGEPR	E				File4192 Spectrum1702 scans: 4063
1	1	EGFR_HUMAN	Epidermal growth factor receptor OS=Homo sapiens GN=EGFR PE=1 SV=2	10682	137612	312	286	99	95	5002	1	1	1	573.599	1717.78	3	1717.78	-0.0003	1	27.39	0.009	R	ECVDKCNLLEGEPR	E				File4192 Spectrum1701 scans: 4062
1	1	EGFR_HUMAN	Epidermal growth factor receptor OS=Homo sapiens GN=EGFR PE=1 SV=2	10682	137612	312	286	99	95	5003	1	1	1	859.895	1717.78	2	1717.78	0.0001	1	76.88	1e-07	R	ECVDKCNLLEGEPR	E				File4192 Spectrum1750 scans: 4125
1	1	EGFR_HUMAN	Epidermal growth factor receptor OS=Homo sapiens GN=EGFR PE=1 SV=2	10682	137612	312	286	99	95	5157	1	1	1	888.924	1775.83	2	1775.83	0.0005	0	60.73	2e-06	K	TCPAGVMGENNTLVWK	Y				File4192 Spectrum3564 scans: 6481
1	1	EGFR_HUMAN	Epidermal growth factor receptor OS=Homo sapiens GN=EGFR PE=1 SV=2	10682	137612	312	286	99	95	5315	1	1	1	908.877	1815.74	2	1815.74	-0.0017	1	99.51	1.1e-10	R	ACGADSYEMEEDGVRK	C				File4192 Spectrum805 scans: 2895
1	1	EGFR_HUMAN	Epidermal growth factor receptor OS=Homo sapiens GN=EGFR PE=1 SV=2	10682	137612	312	286	99	95	5316	1	1	1	908.877	1815.74	2	1815.74	-0.0015	1	72.79	5.3e-08	R	ACGADSYEMEEDGVRK	C				File4192 Spectrum697 scans: 2758
1	1	EGFR_HUMAN	Epidermal growth factor receptor OS=Homo sapiens GN=EGFR PE=1 SV=2	10682	137612	312	286	99	95	5317	1	1	1	908.877	1815.74	2	1815.74	-0.0014	1	102.54	5.6e-11	R	ACGADSYEMEEDGVRK	C				File4192 Spectrum851 scans: 2959
1	1	EGFR_HUMAN	Epidermal growth factor receptor OS=Homo sapiens GN=EGFR PE=1 SV=2	10682	137612	312	286	99	95	5318	1	1	1	908.877	1815.74	2	1815.74	-0.0011	1	94.22	3.8e-10	R	ACGADSYEMEEDGVRK	C				File4192 Spectrum900 scans: 3025
1	1	EGFR_HUMAN	Epidermal growth factor receptor OS=Homo sapiens GN=EGFR PE=1 SV=2	10682	137612	312	286	99	95	5320	1	1	1	606.254	1815.74	3	1815.74	-0.0004	1	49.94	1e-05	R	ACGADSYEMEEDGVRK	C				File4192 Spectrum800 scans: 2890
1	1	EGFR_HUMAN	Epidermal growth factor receptor OS=Homo sapiens GN=EGFR PE=1 SV=2	10682	137612	312	286	99	95	5321	1	1	1	606.254	1815.74	3	1815.74	-0.0003	1	63.29	4.7e-07	R	ACGADSYEMEEDGVRK	C				File4192 Spectrum690 scans: 2750
1	1	EGFR_HUMAN	Epidermal growth factor receptor OS=Homo sapiens GN=EGFR PE=1 SV=2	10682	137612	312	286	99	95	5322	1	1	1	606.254	1815.74	3	1815.74	0.0001	1	67.57	1.7e-07	R	ACGADSYEMEEDGVRK	C				File4192 Spectrum751 scans: 2825
1	1	EGFR_HUMAN	Epidermal growth factor receptor OS=Homo sapiens GN=EGFR PE=1 SV=2	10682	137612	312	286	99	95	5325	1	1	1	606.254	1815.74	3	1815.74	0.0003	1	16.84	0.021	R	ACGADSYEMEEDGVRK	C				File4192 Spectrum1106 scans: 3291
1	1	EGFR_HUMAN	Epidermal growth factor receptor OS=Homo sapiens GN=EGFR PE=1 SV=2	10682	137612	312	286	99	95	5326	1	1	1	606.254	1815.74	3	1815.74	0.0003	1	6.22	0.24	R	ACGADSYEMEEDGVRK	C				File4192 Spectrum994 scans: 3143
1	1	EGFR_HUMAN	Epidermal growth factor receptor OS=Homo sapiens GN=EGFR PE=1 SV=2	10682	137612	312	286	99	95	5327	1	1	1	606.254	1815.74	3	1815.74	0.0005	1	13.5	0.045	R	ACGADSYEMEEDGVRK	C				File4192 Spectrum1052 scans: 3219
1	1	EGFR_HUMAN	Epidermal growth factor receptor OS=Homo sapiens GN=EGFR PE=1 SV=2	10682	137612	312	286	99	95	5328	1	1	1	606.254	1815.74	3	1815.74	0.0006	1	8.88	0.13	R	ACGADSYEMEEDGVRK	C				File4192 Spectrum246 scans: 2109
1	1	EGFR_HUMAN	Epidermal growth factor receptor OS=Homo sapiens GN=EGFR PE=1 SV=2	10682	137612	312	286	99	95	5329	1	1	1	606.254	1815.74	3	1815.74	0.0008	1	3.08	0.49	R	ACGADSYEMEEDGVRK	C				File4192 Spectrum1306 scans: 3542
1	1	EGFR_HUMAN	Epidermal growth factor receptor OS=Homo sapiens GN=EGFR PE=1 SV=2	10682	137612	312	286	99	95	5330	1	1	1	606.254	1815.74	3	1815.74	0.001	1	29.1	0.0012	R	ACGADSYEMEEDGVRK	C				File4192 Spectrum926 scans: 3057
1	1	EGFR_HUMAN	Epidermal growth factor receptor OS=Homo sapiens GN=EGFR PE=1 SV=2	10682	137612	312	286	99	95	5331	1	1	1	908.878	1815.74	2	1815.74	0.0013	1	99.75	1.1e-10	R	ACGADSYEMEEDGVRK	C				File4192 Spectrum754 scans: 2829
1	1	EGFR_HUMAN	Epidermal growth factor receptor OS=Homo sapiens GN=EGFR PE=1 SV=2	10682	137612	312	286	99	95	5332	1	1	1	606.255	1815.74	3	1815.74	0.0021	1	71.99	6.3e-08	R	ACGADSYEMEEDGVRK	C				File4192 Spectrum849 scans: 2956
1	1	EGFR_HUMAN	Epidermal growth factor receptor OS=Homo sapiens GN=EGFR PE=1 SV=2	10682	137612	312	286	99	95	5374	1	1	1	611.586	1831.74	3	1831.74	0	1	40.89	8.1e-05	R	ACGADSYEMEEDGVRK	C	Oxidation (M)	0.0000000010000000.0		File4192 Spectrum855 scans: 2964
[truncated: 984 more rows]

## Sheet: S14 HSC3_DMSO_Mascot_F023040
Supplemental Table 14 - EGFR Peptides from HSC-3 cells + DMSO (Mascot Search Results)
[truncated: 1,255 more rows]

[truncated: 1 more sheets: S15 HSC3_ICG001_Mascot_F023041]
